# Supplementary material for: Streptococcus salivarius subsp. thermophilus CCFM1312 enhanced mice resilience to activity-based anorexia
Source: Royal Society of Chemistry journal article supplement (doi:10.1039/d3fo04663j), 2024-01-01
Supplement: d3fo04663j1.xlsx [file d3fo04663j1.xlsx]

## Sheet: Figure1
Food Intake
Day	CTRL						FR										ABA										ABA+P
1	3.64	4.49	4.69		3.71	3.9	3.94	3.6	3.78	3.88	3.54	3.55	3.68	3.4	3.47	3.7	4.05	2.69	3.41	3.56	2.97	3.37	3.38	3.02	3.4	3.32	2.85	2.5	3.18	2.92	3.63	2.83	3.18	3.28	3.69	4.26
2	3.81	3.72	4.14	3.56	4.12	4.24	4.35	3.83	3.87	4.4	4.75	3.66	4.56	4.43	3.3	3.82	3.93	3.67	4.26	4.04	4.6	3.94	4.08	3.8	3.5	3.61	2.73	3.42	4.22	3.29	5.27	4	4.24	4.62	3.8	4.39
3	3.48	3.66	6.67	3.85	3.46	2.75	3.52	3.67	3.63	2.77	3.54	3.3	4.25	3.99	3.67	3.47	4.12	3.53	3.84	3.82	4.37	4.02	4.03	4.35	3.34	3.63	3.12	3.81	4	2.95	4.52	2.65	3.91	4.63	3.67	4.4
4	3.44	4.3	3.2	3.87	3.49	3.06	1.41	1.51	1.21	1.65	1.71	1.52	1.97	1.35	1.32	1.72	1.32	1.27	1.33	1.26	1.94	1.62	0.87	1.67	1.76	1.71	1.26	1.79	1.42	0.93	1.55	1.15	1.88	1.78	1.25	1.63
5	3.58	3.94	4.15	3.24	3.15	3.6	1.63	1.61	1.6	1.95	1.77	1.48	2.16	2.35	1.78	1.77	1.63	1.44	1.52	1.67	1.8	2.28	1.97	1.44	1.84	1.8	1.84	2.39	1.86	1.92	2.22	1.78	1.7	1.2	1.23	1.3
6	4.39	4.02	3.37	3.01	3.19	3.48	1.81	1.78	1.49	1.97	1.77	1.51	2.03	2.22	1.75	1.82	1.75	1.85	1.85	1.83	1.96	1.31	1.6	1.61	2.15		1.91	2.26	1.9	1.67	1.98	1.93	1.73	1.8	1.57	1.25
7	3.54	3.06	3.54	3.72	4.06	3.09	1.41	1.6	1.37	1.46	1.88	1.6	1.97	2.29	1.69	1.75	1.81	1.72	1.64	1.57	1.65	1.47	1.43	1.5	1.47		1.34	2.01	1.83	2.27	1.95	1.82	1.89	2.14		2.07
8	3.62	3.59	2.99	3.34	3.52	2.9	1.94	1.71	2.04	1.96	2.45	1.79	2.28	2.65	1.93	2.11	1.71	1.77	1.97	1.75	1.9	1.41	1.37	1.32	1.21		1.8		2.11	2.49	2.57	2.4	2.21	2.52		2.18
9	3.35	3.35	3.18	3.39	3.36	3.77	1.86	1.94	2.1	1.86	2.46	1.79	2.37	2.58	2.18	2.04	1.72	1.88	1.85	1.94	1.64	1.48	1.33	1.16	1.26		1.81	1.84	1.87	2.36	2.1	2.13	2.01	2.47		2.16
Bodyweight
Day	AL						FR										ABA										ABA+P
1	100.443	100.93	99.516	97.1316	99.7092	100.318	98.3871	98.8706	100.197	99.8999	97.9686	99.7316	98.3313	98.0686	98.9406	99.5823	98.3237	99.9355	98.2853	100.787	97.287	97.8158	98.514	99.1879	98.8928	98.8377	100.277	98.2694	99.1288	99.8363	96.0571	99.9388	98.4976	97.0131	99.5651	99.5371
2	99.6833	99.38	100.121	100.225	99.8434	101.452	101.179	99.8193	99.9014	101.041	101.878	99.9793	99.6424	99.3014	100.14	99.3437	100.809	99.5487	100.403	99.6066	100.148	100.472	100.209	98.2135	100.961	99.7094	99.5152	99.4579	100.04	101.029	100.971	100.735	99.8798	99.4026	99.4964	99.4109
3	99.8733	99.69	100.363	102.643	100.447	98.2296	100.434	101.31	99.9014	99.0589	100.153	100.289	102.026	102.63	100.919	101.074	100.867	100.516	101.311	99.6066	102.565	101.712	101.277	102.599	100.146	101.453	100.208	102.273	100.831	99.1347	102.971	99.3264	101.623	103.584	100.938	101.052
4	100.697	101.736	100.121	104.949	101.722	96.5586	96.7122	96.2277	94.933	94.8538	95.5538	95.0238	96.0667	97.5139	95.3428	96.3604	94.411	92.392	96.2276	97.3115	101.738	93.2704	97.3838	99.6056	95.8847	97.2284	94.0443	95.392	96.3938	94.6288	96.6286	91.4268	98.5577	100.657	99.4278	102.567
5	102.913	102.17	103.751	103.318	100.984	98.1699	93.0521	92.5683	91.739	92.4509	92.1042	91.1831	93.5042	94.6168	91.9848	93.4964	91.4445	89.2972	90.7807	93.7705	94.9979	90.2007	94.8095	93.4803	90.4324		91.482	91.201	91.8963	91.6113	92.1714	91.2456	94.4711	93.19	95.7885	96.7599
6	106.016	104.65	103.932	102.7	101.924	100.08	90.9429	89.8577	88.7224	89.0869	89.1146	87.4045	90.7032	90.6719	89.6462	89.7971	88.9295	83.8169	87.8152	87.7377	90.674	82.3495	91.6074	86.3805	87.4869	87.9079	87.9501	86.2594	88.3348	87.8696	87.5429	87.342	89.4231	89.0681	89.2653	90.7006
7	104.496	104.092	105.929	105.624	104.406	98.8263	88.7097	86.6727	85.5284	85.7229	84.9751	85.9798	88.7962	89.1309	86.648	87.4105	83.5125	83.1722	85.3944	83.4754	86.6045	77.6269	87.9029	81.7169	80.3426	83.8176	85.3186	81.0031	85.2775	86.6626	85.1429	86.1433	87.5	86.141	85.4756	86.7242
8	106.27	103.844	103.872	105.624	103.266	97.6925	89.7643	84.843	86.179	85.1222	86.6999	86.1656	88.7962	89.9938	84.6692	86.8735		81.5603		81.1148	78.5926	74.9705	85.1402	76.3573	77.2718	82.6106	82.41	88.4013	86.1232	86.1195	85.1429	86.2342	84.9159	85.4839	84.9185	83.8207
9	101.963	101.054	101.21	97.6378	101.32	94.9473	89.6402	86.5372	88.6041	86.9243	88.5972	89.2009	91.478	94.4319	89.5263	88.8425	73.3233	83.3656	84.4261	82.2951	83.2344	75.915		78.4455	80.844		83.3102	85.5172	86.4484	84.49		86.7464	86.0577	85.902	85.9088	84.6169

## Sheet: Figure2
Acyl-ghrelin and ghrelin in duodenum
Group	Acyl-ghrelin						Ghrelin
FR	0.957616	37.2104	30.1146	13.3789	22.3753	7.6948	19.1707	66.4763	62.9083	54.205	32.096	15.1366
ABA	39.4617	18.8292	82.4731	85.9278	65.797	87.4788	78.6502	47.9167	155.462	36.6846	129.589	184.395
ABA+P	49.334	27.997	3.9423	7.0209	19.3972	3.86909	45.6097	26.474	23.2578	50.8879	34.1917	18.9067
Ghrl gene expression in duodenmn				Pcsk1 gene expression in duodenmn				Goat4 gene expression in duodenmn
FR	ABA	ABA+P		FR	ABA	ABA+P		FR	ABA	ABA+P
0.135657	1.38268	0.662363		0.516118	1.20581	0.377163		0.2734	0.7185	0.2263
0.689268	1.84885	0.695168		0.693973	1.29676	0.438064		0.279	0.9927	0.3177
0.804882	1.90445	0.722402		0.80975	1.41351	0.459156		0.4168	1.5845	0.3185
1.44149	2.71346	0.741368		0.87939	1.52626	0.642453		0.6706	1.7476	0.3216
1.70622	3.75764	0.878647		1.07717	1.61888	0.660321		0.8065	2.8153	0.3268
1.90403	3.89713	0.882761		1.21397	1.70527	0.765752		0.8098	5.1732	0.4842
2.02574	4.26073	1.19081		1.63028	2.97401	0.957978		1.5479	5.8245	0.501
2.44071	5.4372	1.49283		1.81971	3.75149	1.10692		1.55	8.9231	0.8581
2.77353		1.71227				1.15488		2.487	10.397	1.7552
Ghrl gene expression in intestinal organoids					Pcsk1 gene expression in intestinal organoids					Goat4 gene expression in intestinal organoids
0	103	105	107		0	103	105	107		0	103	105	107
0.945	0.598	0.426	0.428		1.056	0.752	0.579	0.461		1.262	0.771	0.481	0.456
1.049	0.752	0.429	0.407		1.004	0.829	0.572	0.547		1.058	0.93	0.596	0.389
1.019	0.581	0.374	0.382		0.946	0.726	0.597	0.419		0.757	0.756	0.709	0.558

## Sheet: Figure3
C-fos+ counts in NTS
FR	ABA	ABA+P
22.6087	19.5122	28.8889
22.7414	21.671	29.7928
25.5452	25.2308	31.2155
Blood concentrations of ghrelin and acyl-ghrelin
Group	Acyl-ghrelin										ghrelin
FR	73.9231	62.3846	56.6154	73.1539	88.1539	87.3846	19.3077	45.8462	59.6923	63.1538	425.27	169.28	414.69	523.83	528.62	603.58	661.55	669.18	540.87	622.27	889.4	406.55
ABA	60.8462	130.462	55.0769	40.8462	70.0769	56.2308	62.7692	121.231	76.6154	57	297.13	787.84	1281.34	523.24	223.69	785.63	225.7	354.43	822.24	615.44	837.92	531.04
ABA+P	80.0769	77.3846	52.3846	56.6154	46.6154	73.9231	105.077	92	55.0769	36.2308	470.31	517.35	380.17	894.84		785.63	790.06	633.13	1112.24	739.44	560.67	787.84

## Sheet: Figure4
Agrp gene expression in hypothalamus				Npy gene expression in hypothalamus				AgRP (WB)
FR	ABA	ABA+P		FR	ABA	ABA+P		FR	ABA	ABA+P
0.459463	1.36175	0.27338		0.394002	1.01676	0.195217		0.752896	1.80355	1.48044
0.539149	1.57775	0.374238		0.539149	1.56049	0.27338		1.05594	2.48731	1.18166
0.624678	1.69285	0.618353		0.561	1.5647	0.32142		1.19116	2.20934	0.917044
0.791021	1.78818	0.777664		0.616707	2.2657	0.537702
0.850013	2.00048	0.811834		0.900197	3.02935	0.660435		NPY (WB)
1.09721	2.64826	0.891053		1.1584	3.84438	0.69641		FR	ABA	ABA+P
1.2058	2.94665	1.1826		1.23408	3.9175	0.899		0.765584	1.99301	1.81081
1.20996	3.66484	1.47214		1.35024	5.208	0.945164		1.44141	2.55584	1.54203
1.61631	4.3971	1.66696		1.49108	7.3848	2.13329		0.793001	2.37411	1.33445
DA in striatum				5-HT in striatum
FR	ABA	ABA+P		FR	ABA	ABA+P
0.019877	0.001688	0.019623		0.004141	0.002136	0.004572
0.020032	0.003256	0.024531		0.006442	0.002323	0.005349
0.024767	0.005191	0.037507		0.011626	0.003914	0.010955
0.025462	0.008374	0.053603		0.012096	0.003962	0.015572
0.029565	0.009284	0.06307		0.014028	0.00448	0.016157
0.030306	0.010887	0.067097		0.015164	0.005183	0.017289

## Sheet: Metabolomic analysis
Name	s1008	s1009	s1010	s1011	s1012	s1013	s1014	s1015	s1016	s1017	s1018	s1019	s1020	s1021	s1022	s1023	s1024	s1025	s1026	s1027	s1028	s1029	s1030	s1031	s1032	s1033	s1034	s1036
GROUP	FR	FR	FR	FR	FR	FR	FR	FR	FR	ABA	ABA	ABA	ABA	ABA	ABA	ABA	ABA	ABA	ABA	ABA+P	ABA+P	ABA+P	ABA+P	ABA+P	ABA+P	ABA+P	ABA+P	ABA+P
(+/-)-CP 47,497-C8-Homolog	1.96783e+08	1.94805e+08	3.82989e+08	3.8725e+08	5.32244e+07	1.27034e+08	9.23431e+07	1.41836e+08	3.47688e+08	3.89571e+08	3.84791e+08	3.32066e+08	5.54537e+08	1.19445e+08	2.66854e+07	5.37593e+08	1.06568e+08	1.28818e+07	4.7717e+08	2.66716e+08	4.36531e+07	5.33102e+08	3.47443e+08	4.77929e+08	4.17252e+08	5.56247e+07	4.13881e+07	7.16097e+07
(+/-)12(13)-DiHOME	3.3218e+09	2.61572e+09	1.89716e+09	2.49445e+09	2.29406e+09	1.54871e+09	3.34215e+09	1.64839e+09	3.51014e+09	3.64414e+09	4.05954e+09	1.88612e+09	3.34906e+09	1.92462e+09	2.71555e+09	1.81641e+09	5.08621e+09	5.70294e+09	3.38021e+09	4.25975e+09	4.72501e+09	2.61623e+09	3.43784e+09	3.49169e+09	2.11817e+09	2.18911e+09	1.95359e+09	1.76629e+09
(+/-)19(20)-DiHDPA	2.43912e+08	2.0439e+08	5.44444e+08	7.06845e+08	3.26548e+08	1.08406e+09	5.93563e+08	2.71473e+08	9.88032e+08	2.2722e+08	1.00404e+09	6.28148e+08	8.3607e+08	4.74457e+08	1.16637e+09	1.34918e+09	2.63357e+08	4.1691e+08	5.99158e+08	7.13991e+08	9.20818e+08	2.4636e+08	5.76335e+08	1.39812e+09	5.82353e+08	3.33326e+08	4.5535e+08	6.1918e+08
(+/-)5(6)-EET Ethanolamide	1.23302e+09	9.45503e+07	4.38478e+08	7.97712e+07	1.31118e+09	1.5723e+09	2.99335e+08	5.17666e+08	6.27764e+08	3.55817e+08	2.52267e+08	1.8501e+08	4.37913e+08	3.64393e+08	5.19419e+08	4.53847e+08	2.39576e+08	1.0031e+09	3.04785e+08	7.60084e+08	3.84361e+08	5.60542e+08	6.74293e+08	1.43354e+08	1.79875e+08	6.91871e+08	3.54287e+08	3.97845e+08
(+/-)9-HODE	6.74822e+08	6.06666e+08	7.57828e+08	5.34311e+08	7.88796e+08	6.35697e+08	5.70197e+08	5.3402e+08	7.72652e+08	7.01358e+08	9.49765e+08	8.09409e+08	8.39736e+08	1.25223e+09	6.65614e+08	7.87799e+08	6.33598e+08	7.52232e+08	7.32692e+08	6.39971e+08	6.4415e+08	7.15311e+08	6.79778e+08	6.32976e+08	8.01605e+08	8.94414e+08	6.46283e+08	2.19471e+09
(+/-)9-HpODE	1.00999e+10	1.58592e+10	8.33885e+09	1.18703e+10	7.11059e+09	1.30247e+10	5.60775e+09	4.56443e+09	4.08245e+09	9.61768e+09	1.74107e+10	1.35344e+10	1.42458e+10	7.71709e+09	1.02442e+10	1.66524e+10	1.91858e+10	1.41251e+10	2.66592e+10	7.82948e+09	1.12968e+10	1.53898e+10	8.52273e+09	1.13386e+10	1.26522e+10	4.78711e+09	1.23359e+10	1.11903e+10
(-)-Camphanic acid	2.35201e+09	2.99709e+09	2.36845e+09	2.73306e+09	3.46278e+09	3.36243e+09	2.84172e+09	3.55615e+09	2.40858e+09	3.46029e+09	3.82571e+09	2.1841e+09	2.84938e+09	3.68439e+09	1.69674e+09	2.83141e+08	1.78687e+09	4.94043e+09	3.71884e+09	2.58201e+09	4.25098e+09	3.10683e+09	2.52145e+09	2.97463e+09	1.93907e+09	2.73275e+09	3.16283e+09	3.50113e+09
(-)-Spiculisporic acid	8.17261e+08	7.07215e+08	7.51148e+08	2.01916e+09	7.88002e+08	6.38842e+08	1.05094e+09	7.23245e+08	1.10497e+09	4.93479e+08	1.06323e+09	8.54189e+08	1.5608e+09	7.42222e+08	7.68584e+08	1.3773e+09	8.28878e+08	3.11581e+08	4.8192e+08	5.92648e+08	3.34112e+08	1.18756e+09	6.20863e+08	2.18834e+09	1.02289e+09	1.06246e+09	1.25455e+09	7.52228e+08
(11E,15Z)-9,10,13-trihydroxyoctadeca-11,15-dienoic acid	2.35923e+07	6.91124e+07	2.96449e+07	5.75839e+07	5.2073e+07	4.73789e+07	2.21394e+07	2.99089e+07	3.00539e+07	2.72481e+07	1.23244e+08	4.09216e+07	2.20271e+08	2.55865e+08	4.63384e+07	1.77425e+08	4.30729e+07	3.24832e+07	1.30863e+08	3.45125e+07	1.05977e+08	8.64438e+07	2.08487e+07	3.07468e+08	4.09131e+08	2.58305e+07	5.25774e+07	8.12504e+07
(15Z)-9,12,13-Trihydroxy-15-octadecenoic acid	3.44801e+09	2.54724e+09	3.19913e+09	1.66564e+09	2.40812e+09	1.47477e+09	2.01612e+09	1.89096e+09	3.48564e+09	3.39902e+09	2.39608e+09	1.35184e+09	3.44779e+09	1.99855e+09	2.96256e+09	3.17844e+09	3.53938e+09	3.82575e+09	2.33212e+09	1.91795e+09	3.40265e+09	2.70219e+09	2.85698e+09	3.15059e+09	2.07855e+09	2.55376e+09	1.95547e+09	3.88683e+09
(1H-Indol-3-yl)(2,2,3,3-tetramethylcyclopropyl)methanone	1.29703e+07	1.54849e+07	2.76521e+07	2.19038e+07	1.59602e+07	2.41684e+07	1.32484e+07	2.25648e+07	1.47658e+07	1.78733e+07	3.18602e+07	2.05565e+07	3.64855e+07	1.83245e+07	2.80394e+07	2.84744e+07	1.42692e+07	3.53743e+07	1.50838e+07	2.7587e+07	3.84058e+07	2.52051e+07	1.35384e+07	1.47395e+07	1.23078e+07	1.92223e+07	2.10062e+07	2.42042e+07
(1R,2S,3R,4R)-3-(Isobutylamino)-4-(3-pyridinyl)-1,2-cyclopentanediol	3.48293e+08	4.29899e+08	4.35103e+08	4.1903e+08	4.18813e+08	4.66579e+08	3.33872e+08	4.4161e+08	3.41866e+08	5.82753e+08	6.75538e+08	4.69998e+08	7.39654e+08	1.28605e+09	6.27232e+08	3.79113e+08	3.89996e+08	5.67999e+08	5.14132e+08	5.46625e+08	5.68e+08	4.95813e+08	5.20872e+08	4.1031e+08	5.0827e+08	4.66481e+08	3.9462e+08	7.72681e+08
(2R)-2,3-Dihydroxypropanoic acid	2.41038e+09	2.3087e+09	2.44672e+09	2.03788e+09	1.9373e+09	1.97584e+09	1.76032e+09	2.24516e+09	1.78798e+09	1.40733e+09	2.01335e+09	2.34707e+09	1.52279e+09	2.43276e+09	3.19003e+09	2.98193e+09	2.06005e+09	1.89394e+09	1.79794e+09	1.05835e+09	2.24823e+09	1.55211e+09	1.19817e+09	1.59996e+09	8.11704e+08	1.43881e+09	1.72957e+09	2.32951e+09
(R)-3-Hydroxy myristic acid	5.36867e+08	2.69923e+08	2.676e+08	4.64318e+08	3.89678e+08	1.74548e+08	2.42054e+08	2.62194e+08	3.10351e+08	5.02085e+08	4.36805e+08	3.54507e+08	2.74925e+08	2.98318e+08	3.39341e+08	3.59905e+08	2.97767e+08	5.83682e+08	1.42175e+08	3.30254e+08	3.40159e+08	5.06098e+08	3.45566e+08	3.14802e+08	1.41575e+08	3.22254e+08	2.36812e+08	3.96025e+08
(R)-Equol	1.32642e+08	1.46455e+08	1.0361e+08	6.81288e+07	9.1421e+06	1.00936e+07	1.2381e+08	9.93448e+06	1.14357e+07	9.52304e+06	9.43651e+06	1.01854e+07	1.371e+08	1.01749e+08	2.58501e+07	6.99143e+07	9.05921e+07	1.28494e+08	1.55454e+08	1.00845e+07	7.86358e+07	2.60255e+08	1.79732e+08	1.09089e+08	8.56079e+06	2.36303e+08	9.93483e+06	1.77341e+08
10(11)-EpDPA	1.07865e+09	1.47586e+09	5.97329e+08	3.40767e+08	1.4694e+09	4.07418e+08	1.15577e+09	1.12863e+09	1.21456e+09	1.45539e+09	1.87537e+09	8.15889e+08	2.47012e+09	1.14374e+09	4.36771e+08	1.52694e+09	9.82565e+08	1.67028e+09	9.34007e+08	1.74532e+09	1.55719e+09	1.61175e+09	1.41868e+09	1.53449e+09	1.02185e+09	9.47655e+08	9.9341e+08	4.30754e+08
17(18)-DiHETE	1.63575e+08	2.75802e+08	4.44701e+08	1.1301e+08	1.71835e+08	2.97737e+08	2.07094e+08	2.55966e+08	5.67678e+08	2.84446e+08	3.12868e+08	4.26115e+08	3.28618e+08	2.60485e+08	2.48667e+08	2.6045e+08	2.58987e+08	4.29276e+08	2.02509e+08	1.19821e+08	2.7242e+08	2.06966e+08	2.87566e+08	2.23443e+08	7.25729e+08	1.05669e+09	1.86545e+08	2.14793e+08
9(10)-DiHOME	8.00173e+09	7.74258e+09	1.93451e+10	1.50895e+10	1.29706e+10	4.67191e+09	5.70011e+09	1.40489e+10	1.76325e+10	1.27839e+10	1.52599e+10	9.66801e+09	1.75761e+10	6.8163e+09	1.01617e+10	1.7156e+10	3.17588e+10	1.21521e+10	1.24178e+10	1.99439e+10	2.02796e+10	8.36672e+09	1.36094e+10	8.11901e+09	3.74349e+09	5.82262e+09	7.23428e+09	4.67704e+09
9-HpODE	6.55717e+07	9.42622e+07	1.00658e+08	8.90336e+07	6.3737e+07	9.65634e+07	1.18362e+08	6.47889e+07	9.24505e+07	8.70802e+07	1.33928e+08	1.0776e+08	9.5894e+07	8.12369e+07	1.52707e+08	5.6927e+07	1.47808e+08	1.02862e+08	9.50005e+07	4.60233e+07	8.84494e+07	1.10746e+08	8.75808e+07	1.1356e+08	8.83877e+07	1.01989e+08	9.38737e+07	1.01697e+08
1'-Naphthoyl-2-methylindole	5.94984e+09	4.83339e+09	4.39758e+09	2.83712e+09	3.56568e+09	2.0568e+09	5.86971e+09	4.42722e+09	2.91691e+09	1.08222e+10	1.88248e+10	9.78806e+09	4.40392e+09	8.22008e+09	5.59449e+09	1.49624e+10	2.06853e+10	3.89079e+09	9.34611e+09	6.39535e+09	3.97666e+09	8.82232e+09	1.44542e+10	6.04552e+09	7.65793e+09	1.06265e+10	3.37641e+09	4.73005e+09
1,3,4,10-Tetrahydro-9(2H)-acridinone	7.99564e+08	8.4123e+08	9.75367e+08	9.60642e+08	1.04001e+09	8.19373e+08	8.63561e+08	8.03613e+08	8.47744e+08	1.12191e+09	8.07246e+08	1.04358e+09	9.0606e+08	8.09229e+08	8.57334e+08	1.06984e+09	6.07378e+08	8.84854e+08	9.00067e+08	6.67773e+08	6.8573e+08	7.13787e+08	8.30414e+08	8.88951e+08	2.79539e+08	6.5843e+08	8.57753e+08	9.07947e+08
1,3-Dihydro-1,3,3-trimethyl-2H-indol-2-ylidene acetaldehyde	8.08787e+09	9.324e+08	1.83432e+09	1.05978e+09	1.52741e+09	1.13466e+09	1.71761e+09	1.20606e+09	3.89196e+09	4.8946e+09	1.27581e+09	1.02579e+10	2.15007e+09	6.3398e+08	1.19084e+09	3.16327e+09	3.64961e+09	1.45679e+09	1.47036e+09	1.47844e+09	2.44567e+09	1.63875e+09	5.08741e+09	2.42818e+09	3.84296e+09	1.81565e+09	1.77107e+09	1.23569e+09
1,4-dihydroxy-1,4-dimethyl-7-(propan-2-ylidene)-decahydroazulen-6-one	3.02925e+07	3.00937e+07	3.38266e+07	3.5526e+07	3.00268e+07	2.76306e+07	2.73964e+07	3.18008e+07	3.25326e+07	3.51344e+07	3.06142e+07	3.34929e+07	4.19101e+07	3.6458e+07	3.25625e+07	3.5641e+07	2.52915e+07	2.81765e+07	3.00864e+07	3.49433e+07	7.07611e+07	2.93505e+07	2.69655e+07	3.53938e+07	2.67631e+07	4.0164e+07	2.79129e+07	2.79792e+07
1,4-dihydroxyheptadec-16-en-2-yl acetate	8.46697e+08	9.13654e+08	1.15534e+09	9.9318e+08	1.75869e+09	6.58982e+08	6.45021e+08	1.0743e+09	8.90992e+08	1.12088e+09	9.35847e+08	1.17783e+09	1.47264e+09	3.42649e+08	6.52316e+08	1.17154e+09	3.05023e+09	1.39696e+09	9.56336e+08	1.16986e+09	2.04116e+09	7.7248e+08	1.63343e+09	1.09844e+09	5.87602e+08	7.56579e+08	7.09826e+08	4.10083e+08
1,5-Anhydro-D-glucitol	9.11286e+09	1.27869e+10	9.19321e+09	1.21681e+10	4.7725e+09	6.54178e+09	1.1864e+10	6.21582e+09	1.14564e+10	8.82892e+09	4.02813e+09	1.15806e+10	9.33463e+09	1.48605e+10	1.43115e+10	1.60332e+10	8.76603e+09	6.61358e+09	2.6505e+09	1.25512e+10	8.75532e+09	8.71302e+09	7.29932e+09	6.85135e+09	8.71218e+09	1.26976e+10	1.08272e+10	8.57757e+09
1,5-Isoquinolinediol	2.08437e+10	2.81181e+10	2.5102e+10	2.94411e+10	2.72295e+10	2.15556e+10	2.27144e+10	2.49465e+10	2.44775e+10	3.79753e+10	3.1733e+10	2.53383e+10	3.46243e+10	2.64452e+10	2.94802e+10	2.08401e+10	1.93067e+10	2.75743e+10	2.9838e+10	2.26345e+10	2.45697e+10	2.22947e+10	2.37253e+10	2.90958e+10	2.16659e+10	2.58488e+10	2.60739e+10	2.81211e+10
1,5-Naphthalenediamine	1.24743e+10	9.43529e+09	8.0504e+09	1.01094e+10	7.68983e+09	6.22731e+09	6.25411e+09	6.73035e+09	1.01433e+10	7.59e+09	5.81136e+09	7.05803e+09	7.61045e+08	1.06601e+10	1.1078e+10	1.09214e+10	2.35681e+09	1.84996e+09	8.36972e+09	1.90178e+09	2.15013e+09	1.99212e+09	3.84177e+09	2.21766e+09	1.26895e+09	1.18748e+10	8.65037e+09	1.08786e+10
1-(2,4-difluorobenzoyl)-4-piperidinecarboxylic acid	9.75314e+08	9.01107e+08	1.30325e+09	1.45365e+09	1.1153e+09	8.92347e+08	1.07803e+09	1.02199e+09	1.20978e+09	1.12083e+09	1.19368e+09	1.69533e+09	2.47756e+08	8.59671e+08	2.19974e+09	5.95832e+07	6.33873e+08	8.50396e+08	2.40429e+09	9.77145e+08	1.49577e+08	2.02084e+08	4.5908e+07	8.42999e+08	2.27192e+07	1.41167e+08	2.43906e+09	3.51774e+09
1-(Carboxymethyl)cyclohexanecarboxylic acid	6.84046e+08	7.5138e+08	7.49802e+08	7.5466e+08	7.11982e+08	8.45963e+08	6.54066e+08	8.58842e+08	7.15387e+08	9.723e+08	1.48966e+09	1.08314e+09	2.22021e+09	1.49177e+09	1.42832e+09	9.35146e+08	1.30676e+09	1.33629e+09	1.04951e+09	7.4843e+08	7.33996e+08	2.71717e+08	6.4984e+08	9.91818e+08	7.32529e+08	9.68478e+08	7.84791e+08	1.95586e+09
1-Isopropenyl-2,3-dihydro-1H-benzo[d]imidazol-2-one	4.91762e+08	8.09881e+08	7.51794e+08	2.10328e+09	3.28837e+08	5.01823e+08	3.49792e+08	7.42624e+08	1.40053e+08	9.76708e+08	5.93974e+08	6.47392e+08	3.89595e+08	4.98909e+08	1.07772e+09	1.04812e+09	6.55863e+08	4.38248e+08	1.2733e+09	6.24994e+08	6.54641e+08	5.47305e+08	5.14001e+08	2.92699e+08	3.2271e+08	7.23076e+08	4.12333e+08	2.81293e+08
1-Methylxanthine	2.2241e+09	9.68525e+08	2.52416e+09	5.37856e+09	4.56884e+09	3.8868e+09	3.60986e+09	4.45395e+09	4.31819e+09	5.36384e+09	5.15384e+09	5.90195e+09	5.42311e+09	4.49726e+09	4.19978e+09	2.4358e+09	3.20674e+09	3.91877e+09	3.25395e+09	3.58614e+09	2.62356e+09	4.07327e+09	4.86597e+09	4.78533e+09	3.96388e+09	4.70614e+09	4.44896e+09	5.3036e+09
1-Tetradecylamine	3.09956e+07	3.53132e+07	3.52727e+07	5.42056e+07	4.22621e+07	1.31582e+07	7.79015e+07	2.5442e+07	8.91592e+07	3.09389e+07	5.70325e+07	4.11885e+07	2.48079e+07	2.86627e+07	3.18392e+07	2.27738e+07	4.66531e+07	3.97403e+07	3.32402e+07	5.38465e+07	6.89985e+07	6.28471e+07	4.04151e+07	9.74908e+07	9.39499e+07	3.39141e+07	4.20383e+07	4.33596e+07
1-[3-(3,4-dichlorophenoxy)-2-hydroxypropyl]piperidine-4-carboxamide	4.46673e+09	7.05721e+08	1.81042e+09	7.52135e+09	5.64218e+09	2.51142e+09	1.70161e+09	1.36372e+09	8.4386e+09	6.26183e+08	1.36867e+09	1.91879e+09	1.29452e+09	1.57812e+09	3.66102e+09	1.65964e+09	9.38395e+08	1.61974e+09	1.21932e+09	2.28195e+09	8.91056e+09	9.84008e+08	6.05307e+09	7.20752e+09	6.17041e+09	8.11471e+09	1.6113e+09	4.12815e+08
1-[4-hydroxy-5-(hydroxymethyl)tetrahydrofuran-2-yl]pyrimidine-2,4(1H,3H)-dione	5.4742e+09	5.24603e+09	2.79778e+09	4.7469e+09	3.37189e+09	2.4352e+09	3.57582e+09	2.79263e+09	2.28139e+09	4.63588e+09	4.97989e+09	2.74875e+09	6.80994e+09	8.21375e+08	2.41155e+09	3.27946e+09	6.5525e+09	4.03522e+09	3.44124e+09	4.30441e+09	2.44399e+09	6.66227e+09	4.80483e+09	4.14254e+09	4.78162e+09	6.01827e+09	2.01664e+09	2.7396e+09
1-{4-[(3-{[5-(2-Hydroxy-2-propanyl)-1,2-oxazol-3-yl]methyl}-3-oxetanyl)amino]-1-piperidinyl}ethanone	2.85534e+08	4.48593e+08	5.35253e+08	1.0639e+09	5.23338e+08	4.3717e+08	2.59252e+08	4.07074e+08	8.49127e+08	6.49167e+08	4.23469e+08	2.84913e+08	1.13922e+09	6.49124e+08	1.45484e+09	4.41134e+08	9.68375e+08	1.14299e+09	1.43608e+08	1.67119e+09	8.76613e+08	9.04805e+08	9.17069e+08	8.70796e+08	8.97718e+08	1.86914e+08	9.1294e+08	5.18347e+08
1-{4-[(3S)-3-(5-Methyl-1H-benzimidazol-2-yl)-1-pyrrolidinyl]-1-piperidinyl}ethanone	2.09587e+08	7.22844e+08	5.22463e+08	7.21854e+08	2.75775e+08	4.19024e+08	5.78126e+08	6.87277e+08	4.46787e+08	9.0622e+08	3.46023e+08	3.90444e+08	2.94017e+08	7.18022e+08	7.84556e+08	7.90497e+08	2.6017e+08	4.49157e+08	5.06391e+08	2.78806e+08	4.68267e+08	3.1079e+08	6.10446e+08	4.57384e+08	2.90016e+08	6.10046e+08	8.9563e+08	1.18992e+09
10-HAD	1.21229e+08	2.67668e+08	1.75087e+08	2.55186e+08	2.7433e+08	3.56575e+08	5.20192e+08	1.80651e+08	1.74391e+08	4.75155e+08	6.33609e+08	3.79297e+08	2.2434e+09	3.77976e+08	5.61115e+08	2.27942e+08	9.3956e+08	9.42364e+08	7.99596e+08	6.39148e+08	6.803e+08	7.77176e+08	6.85666e+08	2.92036e+08	9.00197e+08	6.27822e+08	3.14908e+08	1.01256e+09
10-Propoxydecanoic acid	1.1872e+08	8.31665e+07	1.19283e+08	1.23235e+08	1.01012e+08	7.2054e+07	6.59429e+07	1.06813e+08	8.18918e+07	1.62541e+08	2.52099e+08	1.25711e+08	1.96789e+08	1.96309e+08	2.35707e+08	1.05768e+08	1.56591e+08	2.39752e+08	1.53844e+08	1.86602e+08	2.32897e+08	1.60846e+08	2.07839e+08	1.56508e+08	6.90513e+07	1.91571e+08	7.70858e+07	1.14e+08
11(Z),14(Z)-Eicosadienoic Acid	7.37488e+08	4.45371e+08	7.72089e+08	1.29185e+09	6.19649e+08	4.96617e+08	5.59845e+08	9.46199e+08	6.97386e+08	1.07305e+09	6.06074e+08	7.0103e+08	4.52366e+08	4.58654e+08	3.72867e+08	7.18917e+08	5.45637e+08	4.10959e+08	4.94323e+08	5.75543e+08	5.61072e+08	9.16637e+08	1.01717e+09	6.02037e+08	1.17676e+09	8.40535e+08	4.8037e+08	6.51832e+08
11(Z),14(Z)-Eicosadienoic acid	9.45209e+08	1.45292e+09	9.43293e+08	7.35911e+08	1.21823e+09	1.39243e+09	1.5468e+09	1.10915e+09	1.70055e+09	1.21582e+09	1.34773e+09	1.68203e+09	1.10549e+09	1.80619e+09	1.04738e+09	1.6235e+09	9.48939e+08	7.05582e+08	9.13275e+08	1.62731e+09	3.89291e+08	1.82656e+09	9.89007e+08	1.64358e+09	1.56677e+09	1.3095e+09	1.23917e+09	1.81626e+09
11-Prostaglandin E2	1.9238e+08	8.79782e+07	1.38993e+08	1.51168e+08	7.25363e+07	9.18142e+07	1.07305e+08	2.26187e+08	9.51448e+07	1.66958e+08	9.96858e+07	4.48272e+08	3.24688e+08	2.12051e+08	4.51569e+08	2.12823e+08	7.08373e+07	2.03302e+08	2.6025e+08	3.77114e+08	8.15138e+07	4.69691e+08	8.75844e+07	2.35374e+08	3.09596e+08	2.60973e+08	1.79154e+08	4.79139e+08
12-Hydroxydodecanoic acid	8.03141e+07	9.17032e+07	8.20927e+07	9.40985e+07	7.83091e+07	8.78548e+07	6.73716e+07	1.26846e+08	8.77033e+07	8.43149e+07	3.1009e+07	5.41585e+07	3.18668e+07	1.37065e+08	1.29597e+08	4.69621e+07	7.21546e+07	2.33895e+08	8.18155e+07	8.35866e+07	1.22297e+08	1.00128e+08	7.40563e+07	2.32385e+07	3.26555e+07	1.17954e+08	9.39654e+07	1.14137e+08
12-Oxo phytodienoic acid	4.7647e+08	5.2665e+08	5.86703e+08	5.03977e+08	6.23508e+08	5.17229e+08	5.30469e+08	5.51157e+08	5.79361e+08	7.37441e+08	6.04718e+08	5.45297e+08	8.41752e+08	7.57524e+08	6.70475e+08	7.03504e+08	7.55948e+08	6.96192e+08	5.55563e+08	6.50041e+08	5.35308e+08	6.97593e+08	4.66954e+08	8.45086e+08	5.06404e+08	8.22461e+08	5.37125e+08	6.44475e+08
12-oxo Phytodienoic Acid	2.82587e+09	2.73619e+09	1.78103e+09	2.24115e+09	3.0946e+09	2.40242e+09	2.1873e+09	2.13084e+09	2.05051e+09	2.60586e+09	2.28259e+09	2.15627e+09	2.41283e+09	2.52707e+09	2.61018e+09	2.72502e+09	2.50065e+09	4.88932e+09	1.44225e+09	2.02053e+09	3.92931e+09	2.53763e+09	2.51085e+09	1.99648e+09	9.30052e+08	2.90784e+09	1.65398e+09	1.20087e+09
13(S)-HOTrE	6.60016e+09	5.72118e+09	7.07073e+09	4.09319e+09	7.13909e+09	5.99379e+09	5.47819e+09	5.37293e+09	2.5049e+09	6.66012e+09	7.0764e+09	7.19377e+09	7.33038e+09	6.44248e+09	4.92871e+09	7.4606e+09	6.11473e+09	2.05382e+09	3.72257e+09	6.11155e+09	8.49773e+09	3.37516e+09	6.24791e+09	5.02136e+09	2.34251e+09	5.44815e+09	1.29255e+09	1.5904e+09
13,14-Dihydro-15-keto Prostaglandin A2	8.49358e+08	9.80142e+08	2.03868e+09	4.93976e+08	5.07724e+08	1.73197e+08	2.21011e+08	2.25578e+08	5.67766e+07	7.55379e+08	1.44561e+09	4.70223e+08	2.92591e+09	1.60901e+09	1.48411e+09	1.99425e+09	1.41808e+09	1.8175e+09	1.28967e+09	3.48603e+08	9.17671e+08	1.29356e+09	5.14644e+08	1.71901e+08	2.17587e+09	5.32867e+08	9.25941e+08	1.03381e+09
13Z,16Z-Docosadienoic Acid	4.29404e+07	1.75583e+07	1.21696e+07	3.82857e+07	2.40762e+07	3.20537e+07	3.06577e+07	2.3705e+07	3.25574e+07	3.79316e+07	4.07809e+07	4.13679e+07	2.02659e+07	5.10497e+07	5.48032e+07	4.40704e+07	6.11474e+07	2.81482e+07	4.50585e+07	1.92272e+07	3.73714e+07	4.71276e+07	5.30509e+07	5.44517e+07	4.24961e+07	2.64209e+07	4.00024e+07	7.17991e+07
14(Z)-Eicosenoic acid	4.98775e+08	4.15939e+08	5.91045e+08	4.858e+08	4.72607e+08	4.44169e+08	4.66757e+08	4.50156e+08	5.2208e+08	6.05372e+08	4.75263e+08	3.93128e+08	5.88063e+08	6.45032e+08	4.77689e+08	6.04381e+08	6.18458e+08	6.53197e+08	5.2304e+08	6.08501e+08	5.6185e+08	6.96647e+08	6.81138e+08	5.54106e+08	6.3488e+08	6.15812e+08	4.64502e+08	5.26946e+08
15(R),19(R)-hydroxy Prostaglandin F2	1.06824e+08	1.25766e+08	5.11762e+08	1.63145e+08	3.98889e+08	1.7046e+08	3.09243e+08	1.93682e+08	2.05374e+08	6.71624e+08	2.10612e+08	1.29041e+08	2.49138e+08	2.31229e+08	2.66773e+08	1.77217e+08	1.10692e+08	1.7278e+08	1.41818e+08	9.92208e+07	9.37701e+07	1.44067e+08	2.62694e+08	2.30316e+08	1.75111e+08	1.80219e+08	2.84169e+08	3.37476e+08
15-OxoEDE	5.6461e+08	3.9437e+08	2.90923e+08	2.36799e+08	6.53881e+08	6.52814e+08	4.99384e+08	4.18484e+08	3.45292e+08	6.09102e+08	7.40537e+08	2.67791e+08	5.38804e+08	5.40383e+08	1.8156e+08	3.18248e+08	4.90418e+08	3.08499e+08	2.67837e+08	5.4849e+08	6.06625e+08	6.13798e+08	5.55402e+08	8.03427e+08	5.18678e+08	3.90231e+08	3.76967e+08	2.67967e+08
16,17-Dihydroxykauran-18-oic acid	6.58375e+08	2.84547e+08	6.66404e+08	1.98297e+08	2.94696e+08	5.1815e+08	4.8902e+08	6.23914e+08	4.90257e+08	8.6535e+08	4.98353e+08	5.45497e+08	5.1261e+08	7.80631e+08	8.02712e+08	9.34407e+08	4.01462e+08	8.00379e+08	4.14465e+08	7.87094e+08	6.21849e+08	7.81071e+08	4.22418e+08	4.01535e+08	3.59366e+08	1.14128e+09	3.95192e+08	9.71646e+08
16-Heptadecyne-1,2,4-triol	7.89404e+07	9.60614e+07	2.49673e+08	4.11044e+07	9.98949e+07	8.08752e+07	7.95083e+07	1.62672e+08	6.59697e+07	1.35399e+08	8.49329e+07	1.09388e+08	8.80041e+07	8.3913e+07	7.26274e+07	1.40399e+08	8.66108e+07	1.29623e+08	1.04327e+08	3.46997e+07	1.55025e+08	1.12207e+08	1.30411e+08	6.99747e+07	4.60112e+07	8.34805e+07	6.54842e+07	3.60592e+07
16-Hydroxyhexadecanoic acid	6.04411e+09	6.42255e+09	6.32615e+09	8.22574e+09	8.35651e+09	5.63841e+09	4.74381e+09	6.31781e+09	7.00106e+09	1.47723e+10	7.82826e+09	1.06344e+10	9.0756e+09	4.61897e+09	4.65997e+09	1.04201e+10	1.20129e+10	6.94092e+09	7.59374e+09	9.24474e+09	7.95188e+09	1.29237e+10	7.43756e+09	7.76853e+09	3.84466e+09	6.38379e+09	5.56657e+09	1.26835e+10
18Glycyrrhetinic acid	2.82779e+08	3.02389e+08	2.19867e+08	2.54179e+08	7.52188e+07	7.49893e+07	5.51971e+07	1.17622e+08	1.36711e+08	2.19038e+08	8.22531e+07	8.64498e+07	1.54791e+08	5.3643e+07	1.47836e+08	8.33105e+07	2.56406e+08	1.2184e+08	1.93802e+08	3.14842e+08	2.52171e+08	1.57594e+08	3.37133e+08	1.40949e+08	4.96338e+08	8.15931e+07	1.87244e+08	2.97843e+08
2'-Deoxyadenosine	1.46832e+10	4.65025e+09	1.8361e+10	1.89224e+10	2.19332e+09	3.85894e+09	8.73482e+09	2.47373e+09	1.14021e+09	6.26066e+09	6.24582e+09	4.18126e+08	6.41209e+08	2.84818e+09	4.85877e+08	2.5121e+10	1.3012e+09	7.53787e+09	1.61521e+09	2.19671e+09	3.87016e+09	1.01692e+09	1.91793e+09	6.86105e+08	7.36659e+08	1.60896e+10	2.00428e+09	8.30568e+08
2'-Deoxyguanosine	1.17224e+10	3.00019e+09	7.17826e+09	4.60808e+09	1.18525e+09	1.41805e+09	2.80753e+09	1.19917e+09	1.15003e+09	2.12342e+09	2.79932e+09	5.34562e+08	6.21844e+09	5.10281e+08	1.30035e+09	2.7649e+09	7.99723e+09	3.51735e+09	3.04078e+09	3.50119e+09	1.06654e+09	3.64919e+09	3.03884e+09	8.42168e+08	2.81364e+09	2.98788e+09	9.77563e+08	2.08387e+09
2'-Deoxyinosine	6.09302e+10	5.77635e+10	4.07737e+10	5.70333e+10	3.85773e+10	4.29664e+10	4.67938e+10	4.68261e+10	3.95235e+10	6.40317e+10	6.44247e+10	1.57315e+10	6.19169e+10	1.5809e+10	3.06703e+10	4.99511e+10	5.1768e+10	4.72088e+10	1.26096e+10	4.21288e+10	2.50749e+10	5.15936e+10	5.49396e+10	3.65549e+10	3.64092e+10	6.22132e+10	2.49491e+10	3.74685e+10
2,2,6,6-Tetramethyl-4-piperidinol	1.65325e+09	1.19906e+09	4.23448e+08	5.17942e+08	4.60609e+08	1.41175e+09	4.29496e+08	9.43033e+08	5.63287e+08	1.51041e+09	4.18871e+08	3.41584e+08	4.24959e+08	5.70046e+08	1.30806e+09	4.6015e+08	4.88476e+08	9.909e+08	1.39293e+09	5.26342e+08	4.7127e+08	1.57509e+09	4.37846e+08	5.1464e+08	4.74666e+08	4.81484e+08	5.04509e+08	1.32459e+09
2,2-Bis(hydroxymethyl)propionic acid	2.64231e+09	4.31633e+09	8.97097e+09	4.06456e+09	7.14841e+09	8.95195e+09	9.60861e+09	3.96084e+09	9.24132e+09	3.50912e+09	5.66538e+09	3.06896e+09	3.65244e+09	2.50408e+10	1.0337e+10	3.67565e+09	2.83491e+09	4.12893e+09	2.12369e+09	3.29162e+09	9.51531e+09	3.20363e+09	4.51811e+09	3.48563e+09	2.0806e+09	1.95606e+10	6.53648e+09	2.70315e+09
2,3,4,9-Tetrahydro-1H-carboline-3-carboxylic acid	3.64463e+09	3.97621e+09	4.41686e+09	3.48408e+09	4.65825e+09	4.60401e+09	3.74207e+09	4.08884e+09	3.90872e+09	6.09044e+09	4.66161e+09	4.27518e+09	6.95471e+09	4.05395e+09	6.38363e+09	4.62714e+09	6.44274e+09	9.3008e+09	5.8622e+09	4.62745e+09	8.10025e+09	4.92886e+09	5.03122e+09	5.03632e+09	2.66128e+09	4.07749e+09	4.218e+09	6.87417e+09
2,3-Dihydro-1-benzofuran-2-carboxylic acid	9.60823e+09	6.78798e+09	6.83872e+09	5.93723e+09	5.66653e+09	4.09664e+09	5.12857e+09	7.11749e+09	1.23031e+10	7.65266e+09	4.36662e+09	5.09528e+09	6.50724e+09	9.76806e+09	1.35997e+10	1.33731e+09	7.94209e+09	5.17356e+09	7.29232e+09	1.19928e+10	6.72163e+09	6.11791e+09	8.44443e+09	7.49988e+09	7.86211e+09	7.42892e+09	5.90371e+09	1.10751e+10
2,3-Dinor-8-epi-prostaglandin	1.37349e+09	2.89998e+09	1.71929e+09	2.11343e+09	2.35747e+09	2.64514e+09	1.34762e+09	1.96972e+09	2.33965e+09	2.4052e+09	1.43856e+09	3.64097e+09	2.43779e+09	1.80179e+09	3.21482e+09	1.36284e+09	2.43841e+09	2.33617e+09	7.95114e+08	2.65217e+09	1.63417e+09	1.93295e+09	1.32036e+09	2.37366e+09	9.25939e+08	2.47387e+09	2.58289e+09	3.23737e+09
2,3-dihydro-2-spiro[1-(benzyl)piperidin-4-yl]-1,3-benzothiazole	1.66435e+09	1.8448e+09	1.35726e+09	1.70861e+09	1.2414e+09	1.9112e+09	1.20463e+09	8.97913e+08	2.23069e+09	2.63157e+09	1.64161e+09	2.0751e+09	2.06171e+09	2.31273e+09	2.06754e+09	7.60669e+08	3.85492e+08	1.70389e+09	1.63993e+09	3.51575e+09	1.26843e+09	4.82878e+09	1.81128e+09	1.96491e+09	2.29715e+09	1.13732e+09	3.28143e+09	6.12225e+09
2,3-dihydroxypropyl 12-methyltridecanoate	6.16857e+08	1.89748e+08	2.03927e+08	2.10946e+08	2.04637e+08	1.32966e+08	5.44402e+08	1.27318e+08	1.58928e+08	7.55742e+07	4.34735e+08	6.32536e+08	3.96193e+08	1.19375e+08	2.10846e+08	1.76816e+08	1.05739e+08	2.89626e+08	2.3638e+08	1.55336e+08	2.97018e+08	1.54965e+08	1.30907e+08	7.01295e+07	4.58518e+08	2.25229e+08	2.19373e+08	3.49123e+08
2,4,6-Trihydroxyacetophenone	1.61963e+09	1.79148e+09	1.53399e+09	2.033e+09	1.06952e+09	7.63257e+08	7.94191e+08	8.90092e+08	1.09959e+09	1.90341e+09	1.22655e+09	1.57732e+09	1.85069e+09	1.13054e+09	1.81762e+09	1.21306e+09	1.34788e+09	9.76062e+08	1.35407e+09	1.28725e+09	1.18057e+09	8.80559e+08	2.2339e+09	1.36075e+09	1.54746e+09	1.32046e+09	1.41341e+09	3.52754e+09
2,4-Diaminoanisole	2.97941e+08	1.00188e+09	3.50661e+08	3.48475e+08	1.20659e+09	1.01842e+09	5.43699e+08	8.23876e+08	5.16286e+08	5.48244e+08	1.88857e+09	5.36255e+08	5.44629e+08	1.06887e+09	5.83741e+08	4.25659e+08	5.38169e+08	9.7371e+08	1.06037e+09	1.35759e+09	1.87532e+09	3.45591e+08	6.36225e+08	7.16893e+08	9.87659e+08	8.91733e+08	6.08102e+08	4.36298e+08
2,4-Dihydroxybenzoic acid	1.17166e+08	1.70358e+08	1.02316e+08	1.09726e+08	3.39878e+08	1.52188e+08	1.91533e+08	6.46842e+07	2.1638e+08	1.68212e+08	2.27887e+08	1.27015e+08	4.32696e+08	4.07287e+08	1.39248e+08	3.42823e+08	1.80567e+08	5.88434e+08	7.60761e+07	1.24189e+08	4.4751e+08	3.98855e+08	6.0976e+07	1.28292e+08	2.74319e+08	1.63078e+08	1.00169e+08	9.49134e+07
2,4-Dimethylbenzaldehyde	4.6057e+08	8.41763e+08	7.16405e+08	8.7919e+08	9.84596e+08	1.18033e+09	9.34703e+08	5.73539e+08	7.24703e+08	4.4162e+08	8.34839e+08	1.18024e+09	9.4542e+08	1.01663e+09	8.98313e+08	6.00147e+08	7.10049e+08	9.11799e+08	7.36614e+08	8.77697e+08	9.00183e+08	5.76071e+08	6.03761e+08	5.75248e+08	1.07385e+09	6.77161e+08	8.45258e+08	4.75234e+08
2,4-Quinolinediol	1.4482e+09	7.56434e+08	1.07767e+09	1.01665e+09	1.25298e+09	9.02033e+08	6.55008e+08	5.9339e+08	6.15615e+08	8.45695e+08	9.35965e+08	6.29322e+08	6.49126e+08	1.17342e+09	2.01439e+09	1.02104e+09	7.15732e+08	6.0724e+08	8.88463e+08	7.96966e+08	5.65124e+08	9.61989e+08	5.69959e+08	2.09763e+09	4.472e+08	8.25914e+08	6.74576e+08	2.25085e+09
2,4-di-tert-Butylphenol	9.15811e+07	5.53637e+07	9.29022e+07	8.54302e+07	1.01738e+08	1.06442e+08	7.19586e+07	1.26515e+08	1.27038e+08	8.91511e+07	3.08786e+07	3.18088e+07	8.62755e+07	4.87527e+07	2.3863e+07	6.52578e+07	1.98882e+07	6.87476e+07	3.38108e+07	1.00466e+08	9.18774e+07	7.96802e+07	5.89796e+07	9.71886e+07	1.3011e+07	5.96463e+07	4.4761e+07	6.72051e+07
2,5-di-tert-Butylhydroquinone	1.79474e+08	1.96363e+08	2.91187e+08	1.48967e+08	1.78079e+08	2.90704e+08	1.96343e+08	2.30372e+08	1.82114e+08	1.71327e+08	2.63409e+08	1.96265e+08	3.03053e+08	2.26432e+08	2.03766e+08	2.39747e+08	1.82753e+08	2.05965e+08	3.49374e+08	2.69308e+08	1.76856e+08	3.83111e+08	1.70182e+08	2.52501e+08	2.21994e+08	3.11333e+08	2.026e+08	2.30412e+08
2,6-Di-tert-butyl-1,4-benzoquinone	2.3893e+08	3.51336e+09	3.46718e+09	2.99842e+09	2.83411e+09	2.71262e+08	2.90342e+09	3.54854e+09	3.33576e+09	1.6659e+09	2.45573e+09	3.11854e+09	2.33911e+09	3.33652e+09	3.78473e+09	3.52077e+09	1.29923e+09	3.14114e+09	3.33003e+09	3.491e+09	3.49869e+09	3.78264e+09	2.49336e+09	2.89931e+09	3.3777e+09	3.4187e+09	3.27518e+09	2.9774e+08
2,6-Xylidine	3.82621e+09	4.48349e+09	3.94184e+09	3.87129e+09	3.76995e+09	4.40666e+09	3.84553e+09	4.24597e+09	4.71235e+09	3.86642e+09	3.85962e+09	3.87312e+09	3.77858e+09	4.6191e+09	5.0291e+09	3.92576e+09	4.07346e+09	4.54303e+09	4.31914e+09	2.32884e+09	4.19302e+09	4.17655e+09	3.12982e+09	3.78651e+09	3.89061e+09	4.27885e+09	3.96672e+09	4.52861e+09
2-(1-Adamantyl)-6-{[(5-hydroxy-4-pentyl-4H-1,2,4-triazol-3-yl)thio]methyl}pyrimidin-4-ol	1.31339e+08	3.69066e+07	3.38095e+07	4.4034e+07	6.24437e+07	7.12827e+07	2.65391e+08	6.01825e+07	8.72412e+07	7.27346e+07	4.0373e+07	9.98567e+07	4.00788e+07	3.76754e+07	4.42419e+07	5.51039e+07	3.36869e+07	3.86163e+07	4.21033e+07	5.5437e+08	3.59136e+07	1.85394e+08	3.33918e+07	6.91174e+07	2.90075e+07	4.66874e+07	1.37596e+08	4.21101e+07
2-(1-Hydroxyethyl)promazine	5.59562e+08	5.65418e+08	4.60102e+08	4.62916e+08	4.22585e+08	4.92495e+08	1.02104e+09	2.92091e+08	2.04338e+08	4.58583e+08	4.88631e+08	1.15999e+09	4.64578e+08	6.25673e+08	6.54079e+08	3.82976e+08	6.07065e+08	1.51958e+09	6.05889e+08	4.06386e+08	1.44896e+09	4.8226e+08	5.11937e+08	5.19228e+08	4.31033e+08	1.47621e+09	1.18004e+09	4.30756e+08
2-(1-naphthylmethylidene)-1,2,3,4-tetrahydronaphthalen-1-one 1-(2,4-dinitrophenyl)hydrazone	1.1585e+08	7.63893e+07	1.42511e+08	7.63701e+07	1.50014e+08	1.57465e+07	1.52541e+07	3.97302e+07	2.65773e+07	1.36844e+07	2.63472e+07	1.66239e+07	1.25024e+07	1.29577e+07	2.36104e+07	2.90925e+08	1.01727e+07	4.08857e+07	2.35619e+07	9.89466e+06	1.4439e+07	1.05114e+07	3.00769e+07	6.63233e+07	8.97685e+06	1.62866e+07	1.20473e+07	3.01595e+07
2-(14,15-Epoxyeicosatrienoyl) glycerol	2.65707e+09	3.09238e+09	5.12315e+09	1.89299e+09	2.66439e+09	3.85785e+09	3.37259e+09	3.60367e+09	2.69376e+09	2.87727e+09	3.2055e+09	3.82521e+09	3.06873e+09	2.5276e+09	2.53882e+09	3.85942e+09	3.11831e+09	3.61386e+09	2.68955e+09	4.02958e+09	4.0727e+09	8.84821e+08	2.04928e+09	1.38428e+09	1.70946e+09	3.1401e+09	2.38761e+09	1.78524e+09
2-(2'-Hydroxy-3,5'-di-tert-butylphenyl)-5-chlorobenzotriazole	1.08736e+09	7.48792e+08	1.65031e+09	1.60301e+09	5.4915e+08	1.19542e+09	1.1286e+09	1.45001e+09	7.35034e+08	1.07554e+09	8.6007e+08	8.99566e+08	1.5263e+08	3.27593e+08	4.67285e+08	7.7708e+08	1.3934e+08	1.59027e+08	1.00162e+09	5.85522e+08	3.0896e+08	7.58736e+08	2.07366e+08	5.47024e+08	2.91803e+08	8.69164e+08	7.3773e+08	2.56304e+09
2-(2-amino-3-methylbutanamido)-3-phenylpropanoic acid	1.68888e+09	1.06563e+10	2.40151e+09	1.0776e+10	2.43112e+10	1.02651e+10	6.59941e+09	1.42761e+10	1.49124e+10	8.38088e+09	5.67361e+09	2.20625e+10	6.73719e+09	6.99904e+09	1.16498e+10	1.33329e+10	3.55692e+09	1.1489e+10	9.58917e+09	2.84411e+09	4.6263e+09	4.78291e+09	5.11741e+09	4.33961e+09	3.37601e+09	1.16576e+10	1.74291e+10	1.36282e+10
2-(2-hydroxy-3-methylbutanamido)-4-methylpentanoic acid	1.21128e+08	1.5634e+08	1.18555e+08	2.32963e+08	9.97873e+07	1.57407e+09	4.88121e+08	1.63589e+08	5.62691e+08	6.25889e+08	1.64539e+08	2.32106e+08	5.01023e+07	6.72355e+08	4.83909e+08	1.5114e+08	3.59973e+08	9.9108e+07	1.29239e+08	1.32032e+08	1.28901e+08	1.41919e+08	3.02161e+07	1.67129e+08	1.26129e+08	2.30217e+08	8.52028e+08	5.37356e+08
2-(8-Hydroxy-4a,8-dimethyldecahydro-2-naphthalenyl)acrylic acid	1.76102e+08	2.1263e+08	1.93524e+08	3.97933e+08	2.05442e+08	1.97485e+08	1.53996e+08	1.34376e+08	1.90811e+08	5.93423e+08	1.66717e+08	1.9691e+08	4.31574e+08	1.95368e+08	2.03208e+08	2.29743e+08	1.48951e+08	2.37577e+08	2.283e+08	4.0832e+08	1.67725e+08	2.32133e+08	1.87845e+08	1.89946e+08	3.25185e+08	3.33579e+08	2.49353e+08	2.56536e+08
2-(Acetylamino)hexanoic acid	9.11391e+08	6.91234e+09	9.80189e+08	5.5264e+08	4.98317e+08	3.55185e+09	1.17819e+09	2.00717e+09	6.31645e+09	7.10682e+08	2.02822e+08	1.52132e+09	5.82377e+08	6.0882e+09	4.37413e+09	2.6394e+08	4.32774e+08	4.72798e+08	1.10143e+09	3.26241e+09	9.29367e+08	3.53469e+08	1.66767e+08	1.82021e+09	3.37892e+09	4.1708e+09	2.16792e+09	4.02875e+08
2-(Phenylthio)-1-[4-(1H-pyrrol-1-yl)piperidino]ethan-1-one	4.8591e+09	5.27962e+09	3.81023e+09	3.73586e+09	3.68048e+09	5.27973e+09	4.04161e+09	5.08688e+09	4.46203e+09	4.86232e+09	4.03024e+09	3.87442e+09	3.81365e+09	5.10319e+09	5.7577e+09	4.19292e+09	4.50099e+09	4.49329e+09	7.27499e+09	4.78308e+09	4.76284e+09	5.05127e+09	3.78476e+09	3.81204e+09	4.6604e+09	4.73656e+09	4.62816e+09	5.57472e+09
2-(acetylamino)-3-(1H-indol-3-yl)propanoic acid	1.73072e+09	2.84686e+09	3.35498e+09	1.8443e+08	2.03977e+09	2.84251e+09	1.01495e+09	2.35422e+09	5.31272e+09	2.90772e+09	6.93828e+08	6.20595e+08	5.76919e+09	5.32374e+09	7.03555e+09	1.02097e+09	5.03338e+08	4.17806e+09	5.82816e+08	4.37391e+09	7.2575e+09	2.71378e+09	3.80008e+09	3.79474e+09	2.35359e+09	5.03953e+09	7.17115e+09	9.73807e+08
2-Amino-1,3,4-octadecanetriol	8.49993e+10	8.27701e+10	1.7915e+11	9.12858e+10	7.85064e+10	9.5184e+10	8.29477e+10	9.80813e+10	8.60979e+10	7.41262e+10	8.68812e+10	7.82992e+10	8.81125e+10	6.89807e+10	4.41841e+10	8.25698e+10	8.07216e+10	6.16998e+10	9.04538e+10	8.70706e+10	7.75157e+10	9.48224e+10	6.6139e+10	9.47091e+10	8.24982e+10	7.74119e+10	7.09144e+10	7.89569e+10
2-Anisic acid	1.8827e+10	7.92034e+09	2.44353e+10	5.32928e+10	3.07655e+10	1.75057e+09	1.12289e+10	8.14682e+09	6.28399e+09	1.24544e+10	6.52458e+10	3.21046e+10	1.58519e+10	6.64977e+09	4.87084e+09	2.11306e+10	2.21302e+09	1.44212e+10	3.55177e+10	1.79372e+09	1.76964e+09	1.57995e+09	9.34379e+09	4.00007e+10	1.1744e+09	2.49847e+09	1.88779e+10	8.4264e+10
2-Arachidonoyl glycerol	1.9228e+09	2.46402e+08	1.66479e+09	1.46499e+09	6.08214e+08	5.91272e+08	8.92834e+08	1.65399e+09	1.27521e+09	8.07512e+08	1.47122e+09	9.78121e+08	2.29018e+09	6.28934e+08	1.63127e+09	9.53127e+08	1.6919e+09	2.79354e+08	1.35884e+09	1.60242e+09	1.87793e+09	1.18708e+09	8.21084e+08	1.24974e+09	5.45789e+08	5.61039e+08	1.28891e+09	1.02972e+09
2-Hydroxy-4-methylthiobutanoic acid	8.82459e+09	2.7006e+10	5.80462e+09	9.47773e+09	2.06614e+10	4.21294e+10	1.32013e+10	3.81349e+10	1.77352e+10	1.30549e+10	1.05446e+10	1.87494e+10	4.95201e+09	1.00745e+10	1.3331e+10	1.49084e+10	2.00134e+10	2.11671e+10	1.99799e+10	7.31829e+09	3.98916e+10	1.01383e+10	6.54117e+09	1.17063e+10	1.21575e+10	2.51667e+10	1.45486e+10	1.09137e+10
2-Hydroxycaproic acid	5.13484e+10	1.6198e+11	4.09712e+10	4.97967e+10	8.85931e+10	5.45247e+11	9.22741e+10	1.10466e+11	6.38019e+10	6.52964e+10	5.80606e+10	1.25206e+11	1.88718e+10	9.79339e+10	6.04702e+10	1.01437e+11	4.7933e+10	1.64799e+11	6.6061e+10	1.97726e+10	1.80186e+11	3.40238e+10	5.16642e+10	6.41545e+10	1.78931e+10	1.30342e+11	1.31251e+11	1.20328e+11
2-Hydroxyvaleric acid	2.29798e+10	6.27251e+10	2.10913e+10	2.31367e+10	3.77289e+10	1.4845e+11	4.02243e+10	7.14808e+10	5.89596e+10	2.77024e+10	3.04203e+10	2.69734e+10	2.01937e+10	2.92382e+10	4.19546e+10	2.49689e+10	4.76169e+10	6.1966e+10	5.24136e+10	1.83374e+10	8.25434e+10	3.6388e+10	1.83686e+10	2.8211e+10	1.70991e+10	6.32733e+10	3.4486e+10	2.39194e+10
2-Mercaptoethanol	2.38033e+10	3.46034e+10	2.24791e+10	2.28219e+10	2.57325e+10	3.92927e+10	2.61243e+10	3.16466e+10	3.64611e+10	3.02683e+10	3.92442e+10	2.29004e+10	5.72917e+10	2.00887e+10	2.18152e+10	2.09121e+10	2.73623e+10	4.63852e+10	4.0746e+10	7.31727e+10	4.34781e+10	5.91012e+10	2.76905e+10	5.28868e+10	3.98033e+10	3.44102e+10	3.1739e+10	2.03424e+10
2-Methylbenzoic acid	7.94247e+09	1.14439e+10	7.12366e+09	1.06361e+10	1.79936e+10	1.9834e+10	8.79016e+09	1.23663e+10	7.41928e+09	8.84668e+09	1.5806e+10	1.26107e+10	8.88445e+09	3.97081e+09	7.11605e+09	1.50317e+10	1.15575e+10	7.68747e+09	1.79061e+10	1.2923e+10	9.49527e+09	1.02348e+10	1.17708e+10	8.40321e+09	1.23377e+10	8.80942e+09	2.0985e+10	3.63171e+10
2-Naphthalenesulfonic acid	3.36048e+07	4.28824e+07	9.0637e+07	1.01501e+08	1.08446e+08	4.35347e+08	4.26163e+07	3.07061e+07	1.33163e+08	3.57904e+07	2.1018e+07	2.6803e+07	3.43921e+07	1.59686e+08	1.13372e+08	3.96788e+07	3.08707e+08	6.43888e+07	2.98205e+07	4.26073e+07	3.31925e+07	5.70944e+07	9.78648e+07	7.70312e+07	8.11378e+07	1.11523e+08	4.40369e+07	1.68833e+07
2-Naphthylamine	8.7522e+09	6.61571e+09	8.29633e+09	7.29805e+09	5.52353e+09	4.58642e+09	3.05853e+09	4.98771e+09	4.46348e+09	5.73488e+09	4.30604e+09	5.33557e+09	2.4484e+09	7.59215e+09	7.62104e+09	7.73711e+09	3.08461e+09	2.65387e+09	6.37999e+09	1.96281e+09	2.03594e+09	2.08259e+09	2.97949e+09	1.46575e+09	1.74735e+09	8.16122e+09	6.26241e+09	8.47423e+09
2-Oxindole	2.4721e+08	3.69778e+08	3.80743e+08	3.02857e+08	3.83849e+08	3.12564e+08	2.44264e+08	3.94881e+08	4.24559e+08	2.98424e+08	3.40457e+08	3.51532e+08	3.78557e+08	3.78075e+08	3.84526e+08	3.71154e+08	3.75021e+08	3.43274e+08	3.98507e+08	3.34907e+08	4.50166e+08	1.74405e+08	3.45618e+08	3.198e+08	3.94085e+08	3.695e+08	2.30179e+08	1.27928e+08
2-Oxobutyric acid	5.51133e+09	8.9386e+09	4.77499e+09	4.36873e+09	6.66788e+09	5.25651e+09	4.20086e+09	4.82804e+09	4.82542e+09	5.21119e+09	6.45441e+09	4.34436e+09	8.13471e+09	6.65316e+09	5.79419e+09	6.27076e+09	1.01884e+10	1.02388e+10	9.70092e+09	6.77898e+09	1.34379e+10	1.4679e+10	5.43522e+09	9.33748e+09	6.64371e+09	7.52847e+09	3.11086e+09	3.93484e+09
2-Pyridylacetic acid	3.60751e+08	4.2141e+08	5.05284e+08	4.41518e+08	4.01769e+08	4.92468e+08	5.01902e+08	5.20465e+08	4.51342e+08	5.78593e+08	8.87012e+08	4.96852e+08	1.29699e+09	8.47145e+08	7.19364e+08	1.86283e+08	6.93293e+08	7.32768e+08	4.03043e+08	7.11593e+08	4.88643e+08	5.99748e+08	5.39585e+08	7.98106e+08	5.95784e+08	5.90815e+08	5.17353e+08	1.01922e+09
2-[(1S,2S,4aR,8aS)-1-hydroxy-4a-methyl-8-methylidene-decahydronaphthalen-2-yl]prop-2-enoic acid	4.17308e+09	1.00445e+10	1.78383e+10	2.11165e+10	1.35371e+10	9.78803e+09	1.50124e+10	1.1679e+10	3.02462e+09	8.47294e+09	1.53783e+10	1.83729e+10	1.51243e+10	9.50406e+09	3.76452e+09	1.94553e+10	1.02523e+10	5.56248e+09	1.41695e+10	3.85442e+09	4.4822e+09	1.72391e+10	7.15811e+09	1.55179e+10	7.89446e+09	3.54726e+09	3.49299e+09	1.18871e+10
2-[(1S,4S,5S)-4-(Hydroxymethyl)-5-isopropyl-2-methyl-2-cyclohexen-1-yl]-1-[4-(2-methoxyphenyl)-1-piperazinyl]ethanone	3.50322e+08	8.42594e+08	1.17597e+09	3.87829e+08	7.84655e+08	1.88205e+09	1.25462e+09	1.90501e+09	5.31483e+08	2.78463e+09	2.03425e+09	7.33815e+08	6.30313e+08	1.35665e+09	1.89534e+09	1.7878e+09	1.88574e+09	7.90795e+08	2.65513e+09	2.26041e+09	2.64602e+09	3.08227e+09	5.06419e+08	1.83403e+09	1.73019e+09	1.05923e+09	6.54606e+08	7.24162e+08
2-[(2S,3R,4S,5R)-5-(Acetamidomethyl)-3,4-dihydroxytetrahydro-2-furanyl]-N-(4-fluorobenzyl)acetamide	6.43976e+07	7.36308e+07	8.46862e+07	6.23046e+07	7.19107e+07	5.64923e+07	4.9408e+07	9.14471e+07	1.80541e+08	4.62876e+07	1.72502e+08	6.45591e+07	4.432e+07	5.72147e+07	7.21501e+07	8.73367e+07	1.05571e+08	7.40863e+07	6.62614e+07	1.19404e+08	5.04063e+07	1.26973e+08	3.37284e+07	6.38068e+07	1.35443e+08	4.62576e+07	1.54895e+08	4.24966e+08
2-[(2S,4aR,8aS)-2-Hydroxy-4a-methyl-8-methylenedecahydro-2-naphthalenyl]acrylic acid	9.87841e+06	5.23686e+07	4.37705e+07	1.10665e+08	2.22015e+07	5.24212e+07	3.01009e+07	9.59467e+07	6.77755e+07	5.1809e+07	7.0839e+07	3.33657e+07	1.41825e+08	2.51436e+07	8.76916e+07	2.05737e+07	6.27881e+07	2.38593e+07	6.79899e+07	5.11949e+07	7.49277e+07	1.74411e+08	7.08835e+07	5.51548e+07	5.80013e+07	8.75885e+07	4.00924e+07	6.65085e+07
2-[(5-Amino-1,3,4-thiadiazol-2-yl)thio]-N-(8-methyl-8-azabicyclo[3.2.1]oct-3-yl)acetamide	2.46552e+08	1.08581e+08	3.53406e+08	7.69312e+07	3.66016e+08	4.387e+08	2.27934e+08	3.96516e+08	4.8587e+08	4.04923e+08	7.98205e+07	7.1004e+08	7.87769e+07	3.71264e+07	7.44379e+07	2.32845e+08	2.16512e+07	5.43167e+07	1.18595e+08	1.15278e+08	1.32391e+08	2.64639e+07	6.33671e+07	1.01483e+07	1.43074e+08	2.21283e+08	3.58653e+08	3.06467e+08
2-[(5R,8S,8aS)-3,8-dimethyl-2-oxo-1,2,4,5,6,7,8,8a-octahydroazulen-5-yl]prop-2-enoic acid	1.1047e+08	4.203e+08	1.0476e+08	5.01222e+08	3.69926e+08	1.33755e+08	6.9327e+08	8.80443e+07	1.56036e+08	1.06358e+08	4.1294e+08	1.74533e+08	1.55134e+08	1.31579e+08	3.02669e+08	1.58023e+08	6.11812e+07	4.24388e+08	2.93739e+08	1.24488e+08	8.10952e+07	1.27821e+08	1.70098e+08	1.80924e+08	2.74824e+08	3.70355e+08	3.21844e+08	4.22027e+08
2-[(Dimethylamino)methylidene]indan-1-one	3.55037e+08	2.27231e+08	3.75106e+08	2.69806e+08	2.53727e+08	2.63039e+08	2.22693e+08	2.43673e+08	3.22313e+08	3.61352e+08	2.9606e+08	3.13322e+08	2.79464e+08	2.10531e+08	1.52571e+08	4.19943e+08	2.11007e+08	2.39333e+08	2.03225e+08	3.55379e+08	3.89198e+07	4.05861e+08	2.35766e+08	3.91738e+08	2.62767e+08	2.46603e+08	1.75847e+08	3.05287e+08
2-benzyl-6-hydroxy-2-azabicyclo[2.2.2]octan-3-one	4.93166e+08	6.66454e+08	7.71691e+08	8.17491e+08	3.32394e+08	5.63688e+08	5.40027e+08	6.5047e+08	4.9748e+08	8.77131e+08	6.9317e+08	9.71084e+08	9.95643e+08	5.58842e+08	6.98166e+08	5.83104e+08	5.10146e+08	4.88196e+08	6.13108e+08	6.06147e+08	9.9776e+08	9.64431e+08	7.1224e+08	1.00812e+09	5.85327e+08	3.64223e+08	5.66058e+08	7.19286e+08
2-hydroxy-6-[(8Z,11Z)-pentadeca-8,11,14-trien-1-yl]benzoic acid	6.98017e+08	1.90241e+08	1.19986e+08	9.1884e+07	2.21219e+08	5.44763e+08	3.14191e+08	1.86178e+08	1.37687e+08	2.55451e+08	1.93031e+08	2.38488e+08	4.23219e+08	1.33674e+08	1.0178e+08	1.41586e+08	1.41886e+08	5.37305e+08	1.68847e+08	9.15616e+07	2.7364e+08	6.42028e+08	2.52474e+08	1.29688e+08	9.05689e+07	2.80977e+08	1.31477e+08	1.08826e+08
2-methyl-3-(2-thienyl)-3,3a,4,5-tetrahydro-2H-benzo[g]indazole	1.80701e+08	1.83696e+08	3.9056e+08	1.82998e+08	4.71255e+08	3.31064e+08	1.41384e+08	2.58628e+08	3.64627e+08	1.36441e+08	3.12063e+08	8.81457e+08	3.41307e+08	1.2583e+08	2.01892e+09	3.10936e+08	1.0543e+08	1.76642e+08	9.87715e+08	1.47438e+08	1.71381e+08	2.2089e+08	1.95078e+08	2.19355e+08	4.80401e+08	1.15268e+08	6.0016e+08	9.31001e+08
2-phenyl-4H-furo[2,3-h]chromen-4-one	6.44538e+08	6.43731e+08	4.90738e+08	4.4333e+08	5.31538e+08	4.29944e+08	4.81797e+08	4.27056e+08	5.17815e+08	4.79031e+08	4.13006e+08	5.49817e+08	4.27586e+08	6.59145e+08	4.70359e+08	5.46228e+08	5.20791e+08	8.74215e+08	1.43323e+08	2.92158e+08	6.12464e+08	4.51534e+08	3.70396e+08	4.61203e+08	2.82794e+08	3.78049e+08	5.46265e+08	4.85213e+08
2-{(3R,4S)-3-[(5-Butyl-1,2-oxazol-3-yl)methyl]-4-piperidinyl}-1-(4-phenyl-1-piperazinyl)ethanone	2.80263e+07	4.36868e+07	2.11902e+07	2.42553e+07	3.76759e+07	3.64905e+07	2.3246e+07	1.93561e+07	2.16518e+07	4.54023e+07	6.75857e+07	2.02688e+07	1.8151e+07	3.83795e+07	2.95661e+07	2.05143e+07	2.0201e+07	2.63974e+07	1.96832e+07	2.27e+07	1.95711e+07	6.61033e+07	1.79504e+07	2.43365e+07	3.55459e+07	3.44699e+07	8.88416e+07	6.97823e+07
2-{[5-(1-ethyl-3-methyl-1H-pyrazol-5-yl)-1,3,4-oxadiazol-2-yl]thio}-1-(4-methylphenyl)ethan-1-one	1.0899e+09	4.45109e+08	5.42719e+08	1.13006e+09	1.03601e+09	1.11178e+09	1.08885e+09	1.14764e+09	2.35979e+09	7.29139e+08	5.54179e+08	1.25637e+09	6.22259e+08	2.9572e+08	1.30757e+09	3.48777e+08	3.14344e+08	1.1919e+08	3.00679e+08	1.74151e+09	1.39871e+09	1.11299e+09	1.04096e+09	1.34806e+09	2.60593e+08	1.21811e+09	1.52638e+09	3.26559e+08
25N-NBOMe	1.97512e+08	3.61503e+08	6.26192e+08	3.35125e+08	3.04827e+08	6.67235e+08	5.21932e+08	3.36655e+08	2.21194e+08	1.69822e+09	3.56126e+08	3.05716e+08	9.36032e+08	2.83863e+08	1.23246e+09	1.02471e+09	4.1947e+08	6.98923e+08	7.67319e+08	6.20482e+08	1.66604e+08	1.33146e+09	2.52912e+08	2.19184e+09	2.48436e+09	1.2087e+09	1.29333e+09	1.37742e+09
3,12-Dihydroxy-13-methoxypodocarpa-8,11,13-trien-7-one	4.87972e+07	5.02013e+07	6.08983e+07	6.59677e+07	8.72081e+07	2.39936e+08	1.2738e+08	7.03079e+07	9.21481e+07	2.56257e+07	5.34492e+07	4.18679e+07	1.11489e+08	6.82312e+08	7.82096e+07	4.52894e+07	3.49355e+07	1.85956e+07	5.18217e+07	4.12835e+07	5.37206e+07	9.79995e+07	3.11469e+07	3.28636e+08	5.99799e+07	1.65879e+08	1.33868e+08	2.2175e+08
3,3-Dimethylglutaric acid	3.56181e+08	9.41783e+08	3.34881e+08	2.90461e+08	5.13805e+08	4.9707e+08	1.93039e+08	8.25694e+08	2.27582e+08	6.81738e+08	8.11503e+08	1.94943e+08	3.09822e+08	8.60029e+08	4.00501e+08	4.37135e+08	6.94283e+08	1.07233e+10	3.15398e+08	2.0091e+08	4.48757e+08	5.57855e+08	4.45094e+08	6.68149e+08	8.41558e+08	4.43176e+09	8.34719e+08	3.66838e+08
3,3-dimethyl-5-oxo-5-(2-piperidinoanilino)pentanoic acid	4.40712e+08	5.99605e+08	4.70422e+08	4.04764e+08	4.68396e+08	4.09525e+08	5.33034e+08	5.18842e+08	7.36807e+08	4.91121e+08	4.64691e+08	2.14852e+07	7.9352e+08	3.98928e+08	4.1848e+08	4.98317e+07	2.53167e+08	1.17608e+09	3.3171e+08	8.64401e+08	7.22788e+08	6.81591e+08	7.20234e+08	8.11279e+08	7.06546e+08	4.74412e+08	5.7515e+08	6.86839e+08
3,4-Dihydroxybenzenesulfonic acid	3.25299e+07	4.25186e+07	6.25922e+07	7.59184e+08	3.06425e+08	3.46397e+08	3.24691e+08	2.38674e+08	3.14344e+08	2.32752e+09	2.80674e+07	1.74508e+09	4.17554e+07	3.74717e+07	3.34683e+07	2.40664e+07	4.92237e+07	2.99086e+07	6.18109e+07	1.14894e+09	1.01259e+09	2.04815e+09	1.02554e+09	7.9601e+07	4.61396e+07	3.39482e+08	7.01222e+08	1.70201e+08
3,4-Dihydroxyphenylpropionic acid	4.4698e+10	8.26411e+10	2.8026e+10	2.45518e+10	1.27924e+11	1.39094e+11	5.34346e+10	8.08146e+10	4.17509e+10	3.48244e+10	3.29442e+10	3.12293e+10	4.99848e+10	4.52909e+10	4.5675e+10	3.1409e+10	3.67639e+10	5.35576e+10	5.13231e+10	3.64816e+10	1.71177e+10	9.40617e+09	1.62697e+10	5.13796e+10	3.17941e+09	2.4979e+10	1.5488e+11	2.36268e+11
3,5-Dihydroxybenzoic acid	5.42401e+09	6.68337e+09	3.95272e+09	3.01063e+09	9.8695e+09	3.19556e+09	5.03622e+09	4.72854e+09	6.77699e+09	4.0063e+09	7.0938e+09	4.40215e+09	5.54016e+09	1.85786e+10	6.09488e+09	6.57509e+09	2.96531e+09	6.72039e+09	5.82119e+09	2.16274e+09	5.43164e+09	3.23613e+09	3.5406e+09	2.05699e+09	3.61968e+09	3.8986e+09	3.27056e+09	3.01211e+09
3,5-di-tert-Butyl-4-hydroxybenzyl alcohol	6.81632e+07	4.49464e+07	6.46351e+07	2.75081e+07	4.69267e+07	7.04063e+07	5.33552e+07	7.00233e+07	2.59551e+07	4.18738e+07	8.44486e+07	6.12886e+07	5.99926e+07	5.99187e+07	1.1286e+08	8.91487e+07	4.92111e+07	1.01838e+08	9.2431e+07	5.14364e+07	1.19128e+08	6.68805e+07	4.65951e+07	7.06168e+07	4.49645e+07	5.82015e+07	7.09792e+07	6.90261e+07
3,8,9-trihydroxy-10-propyl-3,4,5,8,9,10-hexahydro-2H-oxecin-2-one	1.3154e+10	2.3224e+09	1.80519e+10	2.19649e+10	1.40878e+10	4.74978e+09	2.70171e+10	1.34118e+10	1.39938e+10	3.13703e+10	1.11338e+10	2.96743e+10	1.47519e+10	5.80474e+09	9.38697e+09	6.60127e+09	6.37917e+09	1.64036e+10	6.40335e+09	4.79611e+09	1.40575e+09	1.09343e+10	1.34285e+10	1.88796e+10	1.23092e+10	2.89084e+10	3.03699e+10	1.04795e+10
3-(3-methylbut-2-en-1-yl)-3H-purin-6-amine	2.46281e+09	1.30792e+09	1.76417e+09	2.13266e+09	1.12454e+09	3.28295e+08	6.14894e+08	6.8496e+08	5.21283e+08	1.40401e+09	1.80501e+09	1.68051e+09	2.43793e+09	3.52774e+09	1.90213e+09	1.29811e+09	1.17788e+09	1.79348e+09	2.33742e+09	1.7271e+09	1.43402e+09	1.63476e+09	1.54172e+09	1.529e+09	1.18596e+09	6.17196e+08	4.87739e+08	1.39985e+09
3-(4,5-diphenyl-1H-imidazol-2-yl)pyridine	9.7329e+08	8.51177e+08	5.82453e+08	8.48122e+08	5.14805e+08	8.0249e+08	4.23308e+08	7.41373e+08	7.76032e+08	8.61867e+08	6.17219e+08	9.54489e+08	2.08326e+08	7.97826e+08	6.04509e+08	1.02733e+09	3.1276e+08	1.5583e+08	6.14423e+08	3.7179e+07	2.37405e+08	7.22131e+07	2.49499e+08	1.87225e+08	8.6733e+07	4.69842e+08	6.13699e+08	5.44578e+08
3-(4-Hydroxyphenyl)propionic acid	3.44351e+10	1.7818e+11	3.76704e+10	1.86017e+11	4.50093e+10	4.82232e+10	4.35073e+10	4.15299e+10	2.83037e+10	3.1437e+11	2.47021e+11	1.52052e+11	3.87563e+11	1.88795e+11	2.86923e+11	2.11425e+11	2.46854e+11	3.31968e+11	3.15697e+11	1.98521e+11	2.72116e+11	2.61698e+11	1.67106e+11	2.33559e+11	1.59057e+11	1.64828e+11	5.82306e+10	1.66422e+11
3-(4-acetylanilino)-1-(4-fluorophenyl)prop-2-en-1-one	8.03191e+08	7.12528e+08	7.53548e+08	7.40619e+08	5.9351e+08	9.14705e+08	6.0131e+08	9.82604e+08	1.70864e+09	6.66222e+08	1.27102e+09	9.34858e+08	3.94782e+08	2.4642e+09	8.47988e+08	8.35287e+08	6.88656e+08	8.88153e+08	9.62213e+08	4.35887e+08	4.07292e+08	1.93709e+09	4.64714e+08	5.89705e+08	5.22335e+08	8.39748e+08	1.13949e+09	7.29314e+10
3-(allylsulfanyl)-4-[4-(benzyloxy)phenyl]-5-methyl-4H-1,2,4-triazole	5.22726e+07	3.77817e+07	3.6781e+07	6.02343e+07	4.18506e+07	5.02252e+07	2.98942e+07	3.92247e+07	8.93614e+07	3.26873e+07	3.34518e+07	7.27029e+07	3.0633e+07	3.46816e+07	3.60255e+07	4.78296e+07	2.53826e+07	3.23955e+07	4.51752e+07	2.77457e+07	3.28854e+07	2.05623e+08	2.57018e+07	3.8107e+07	2.43455e+07	3.35754e+07	8.5333e+07	3.62993e+07
3-(tert-Butyl)-1-(4-fluorobenzyl)-N-(2-furylmethyl)-1H-pyrazole-5-carboxamide	9.36264e+08	7.25447e+08	8.94018e+08	3.94461e+08	7.1543e+08	7.83684e+08	3.30336e+08	5.05627e+08	5.5599e+08	1.20428e+09	1.01573e+09	1.06708e+09	1.16849e+09	6.57277e+08	6.89353e+08	1.05532e+09	5.87026e+08	8.32616e+08	8.17666e+08	5.22316e+08	6.24829e+08	4.88429e+08	1.21012e+09	7.17411e+08	7.11281e+08	7.85217e+08	7.16714e+08	1.34003e+09
3-(tert-butyl)-1-methyl-N-(6-quinoxalinyl)-1H-pyrazole-5-carboxamide	7.18341e+08	1.19458e+09	6.48155e+08	6.04312e+08	4.45409e+08	5.94121e+08	3.98909e+08	4.97221e+08	4.3782e+08	5.11329e+08	4.72732e+08	4.72257e+08	1.42117e+08	3.29541e+08	1.70684e+09	4.83378e+08	1.83612e+08	3.64519e+08	1.45539e+08	6.12287e+08	5.52985e+08	3.32673e+08	5.17509e+08	1.08305e+09	3.22762e+08	1.57251e+08	2.3518e+08	2.14951e+08
3-Acetamidophenol	9.46211e+08	9.01904e+08	8.84571e+08	9.92852e+08	9.2674e+08	9.38113e+08	8.78783e+08	9.93091e+08	1.1707e+09	9.34912e+08	9.13108e+08	9.02151e+08	9.41792e+08	1.12383e+09	1.07225e+09	9.08132e+08	9.69501e+08	9.80263e+08	1.06928e+09	1.10857e+09	9.45995e+08	1.0341e+09	5.55152e+08	9.42956e+08	7.88359e+08	8.84104e+08	8.09866e+08	9.56382e+08
3-Acetyl-11-keto-boswellic acid	1.05089e+09	1.16101e+10	6.24292e+08	7.49464e+08	9.01334e+08	8.55363e+08	8.9312e+08	7.01001e+08	1.72509e+09	4.48039e+08	9.85304e+08	9.08487e+08	3.17513e+09	7.92218e+08	9.40943e+08	9.91653e+08	4.13059e+08	1.17155e+10	1.32981e+09	9.0516e+08	2.90186e+09	8.8138e+08	8.1982e+08	8.02385e+08	7.75857e+08	1.08048e+10	1.11245e+09	6.33505e+08
3-Aminophenol	1.68532e+09	2.99951e+09	2.7753e+09	1.9396e+09	1.1256e+09	1.69363e+09	1.85531e+09	1.73603e+09	1.32866e+09	1.6081e+09	1.13384e+09	1.87239e+09	1.94872e+09	2.28486e+09	1.80765e+09	1.56206e+09	2.44759e+09	1.30962e+09	1.48271e+09	1.59326e+09	1.6833e+09	1.60625e+09	1.55838e+09	1.68087e+09	1.24721e+09	2.28042e+09	1.54508e+09	1.16524e+09
3-Coumaric acid	1.92063e+09	2.67596e+09	1.43972e+09	2.65076e+09	1.43622e+09	1.59471e+09	1.52036e+09	2.2909e+09	2.76103e+09	1.48443e+09	1.57227e+09	1.95956e+09	2.56529e+09	7.76614e+09	5.94358e+09	1.72495e+09	3.33447e+09	5.61193e+09	4.16555e+09	8.49307e+09	3.85043e+09	2.83615e+09	4.34326e+09	4.9523e+09	2.30554e+09	2.31854e+09	2.17265e+09	2.2925e+09
3-Hydroxybenzoic acid	1.8329e+10	1.26521e+10	1.36473e+10	1.12068e+10	1.50547e+10	1.48864e+10	1.31986e+10	1.76465e+10	1.20881e+10	2.07212e+10	2.45701e+10	2.10372e+10	1.35904e+09	2.24074e+10	2.17863e+10	2.42269e+09	5.96954e+09	4.34e+10	2.23891e+09	1.19209e+10	2.70286e+10	9.85658e+09	2.87639e+09	1.41111e+10	8.6543e+09	1.91313e+10	1.87035e+10	2.91365e+10
3-Hydroxybenzyl alcohol	3.30969e+09	1.15948e+10	1.0885e+09	2.64936e+09	1.42977e+10	2.14123e+09	5.01033e+09	7.952e+09	5.6983e+09	5.6277e+09	1.1971e+10	8.53973e+09	2.86776e+09	1.65505e+09	5.69261e+09	5.55323e+09	1.17526e+09	6.49835e+09	6.10967e+09	1.41042e+09	3.47977e+09	1.27055e+09	1.34272e+09	8.93402e+09	2.38221e+09	2.26895e+09	3.93015e+09	3.11725e+10
3-Hydroxybutyric acid	2.3765e+10	2.31558e+10	1.82227e+10	4.95982e+09	1.87623e+10	1.83556e+10	6.16522e+09	4.85759e+09	2.43241e+10	2.06451e+09	5.46695e+09	4.86517e+09	1.75821e+09	3.05828e+10	4.75023e+09	5.1997e+09	5.48392e+09	5.30441e+09	4.43215e+09	2.53001e+10	8.48866e+09	4.58003e+09	1.09814e+10	5.66251e+09	4.71868e+09	2.6525e+10	1.55672e+09	2.45968e+09
3-Hydroxydecanoic acid	9.31085e+08	7.38714e+08	7.43709e+08	1.03702e+09	1.08346e+09	7.06177e+08	5.73636e+08	5.86231e+08	8.00676e+08	6.75271e+08	9.24052e+08	9.58583e+08	1.00754e+09	4.83538e+08	4.65097e+08	3.09148e+08	3.17841e+08	5.43242e+08	8.15747e+08	5.63604e+08	3.927e+08	2.86694e+08	7.22176e+08	9.8002e+08	7.39457e+08	8.39911e+08	7.88775e+08	1.96495e+08
3-Indoxyl sulphate	1.58474e+07	2.93771e+07	1.69274e+07	7.88498e+08	1.61954e+08	2.03464e+08	5.31125e+07	1.58609e+08	2.70349e+07	2.09849e+09	2.74883e+07	1.36823e+08	9.0573e+07	6.05921e+07	4.39376e+07	2.05206e+07	1.0988e+08	3.07611e+07	3.35323e+07	3.1992e+08	5.5563e+08	3.89039e+09	7.26028e+08	1.39964e+08	1.39779e+07	1.46159e+08	8.92804e+07	4.08629e+07
3-Methoxyphenylacetic acid	4.80235e+08	3.14727e+08	3.99573e+08	6.09675e+08	6.9733e+08	2.79011e+08	5.58465e+08	4.24116e+08	6.34737e+08	2.83488e+08	7.36921e+08	6.83611e+08	5.13452e+08	7.30292e+08	1.50292e+09	5.1488e+08	6.90821e+08	4.80562e+08	3.04284e+08	6.79104e+08	5.13975e+08	4.96917e+08	2.0465e+08	5.10873e+08	4.0958e+08	5.77272e+08	3.22835e+08	3.61571e+08
3-Methyl-5-(5,5,8a-trimethyl-2-methylene-7-oxodecahydro-1-naphthalenyl)pentyl acetate	2.28857e+08	2.3802e+08	2.42919e+08	2.83119e+08	2.56421e+08	2.84118e+08	2.49657e+08	1.46251e+08	2.42983e+08	3.29817e+08	2.89673e+08	2.43903e+08	3.44116e+08	1.89877e+08	1.83939e+08	3.48715e+08	2.51996e+08	2.74283e+08	2.42412e+08	3.81066e+08	2.87214e+08	2.65914e+08	3.36541e+08	2.55413e+08	2.67349e+08	1.52883e+08	3.61102e+08	2.49981e+08
3-Methyl-pyrrolidinopropiophenone	1.53947e+09	2.21315e+09	3.67823e+09	2.73783e+09	3.3048e+09	3.32659e+09	2.00329e+09	2.21252e+09	2.21043e+09	3.1858e+09	2.19685e+09	3.02367e+09	3.36946e+09	7.4057e+08	1.10983e+09	2.31394e+09	1.72242e+09	2.09075e+09	2.1672e+09	2.75785e+09	4.54051e+09	2.80262e+09	1.86351e+09	1.94942e+09	1.00282e+09	1.75257e+09	1.37772e+09	8.86583e+08
3-Methyladenine	4.43534e+09	5.01869e+09	1.32352e+10	5.79482e+09	4.34376e+09	2.72557e+09	3.61777e+09	2.83156e+09	1.7746e+09	4.93209e+09	4.91034e+09	5.85937e+09	5.67987e+09	1.52272e+10	5.25178e+09	4.84022e+09	6.25991e+09	3.61241e+09	3.28759e+09	3.29513e+09	1.06247e+10	3.1392e+09	7.85323e+09	4.40231e+09	3.63587e+09	3.65711e+09	2.99648e+09	4.01135e+09
3-Methyladipic acid	6.84958e+08	1.07547e+09	9.1656e+08	2.90461e+08	1.51973e+09	1.19252e+09	1.11942e+09	1.15028e+09	1.35137e+09	6.81738e+08	8.11503e+08	2.24163e+09	6.22598e+08	5.38263e+08	1.70601e+09	4.37135e+08	1.48606e+09	9.52075e+09	2.09286e+09	9.40904e+08	1.99357e+09	1.73974e+09	4.45094e+08	1.29932e+09	1.14346e+09	3.81253e+09	1.76149e+09	7.64296e+08
3-Methylsalicylic acid	4.62478e+08	8.89476e+08	5.04472e+08	7.40671e+08	6.89189e+08	4.14185e+08	4.36998e+08	7.10297e+08	4.71496e+08	8.00457e+08	1.0871e+09	8.73053e+08	8.22164e+08	5.44532e+08	7.42336e+08	1.06186e+09	7.48143e+08	8.85653e+08	1.11135e+09	7.31456e+08	8.70259e+08	6.81358e+08	4.9372e+08	6.62644e+08	9.13688e+08	5.2699e+08	8.81236e+08	1.38743e+09
3-Methylxanthine	1.03527e+09	3.5972e+08	1.05387e+09	1.97142e+09	1.77622e+09	1.94979e+09	1.59234e+09	1.94564e+09	1.65289e+09	2.07268e+09	2.2548e+09	2.37855e+09	2.3889e+09	1.74275e+09	1.57115e+09	1.13633e+09	1.32596e+09	1.8133e+09	1.50601e+09	1.69939e+09	1.31312e+09	1.84424e+09	2.22478e+09	2.14099e+09	1.78718e+09	1.82877e+09	1.93951e+09	2.51374e+09
3-Phenyllactic acid	3.97771e+10	1.02973e+11	2.53385e+10	5.18447e+10	1.05433e+11	2.18861e+11	8.01696e+10	1.25038e+11	7.48317e+10	4.48265e+10	4.69191e+10	6.16441e+10	1.43767e+10	4.58748e+10	5.00486e+10	6.82474e+10	2.89535e+10	8.97037e+10	5.43155e+10	1.85399e+10	1.22005e+11	2.51961e+10	3.96619e+10	2.65749e+10	1.38663e+10	7.14448e+10	7.70626e+10	6.15252e+10
3-[2,6-Dinitro-4-(trifluoromethyl)anilino]-2-azepanone	8.5996e+07	1.54469e+08	2.90091e+08	1.62674e+08	4.48227e+08	3.8868e+08	6.03333e+08	2.937e+08	3.27954e+08	3.30088e+08	2.17708e+08	3.94467e+08	2.33379e+08	4.27456e+08	4.65746e+08	2.95211e+08	2.56911e+08	3.65536e+08	2.34003e+08	2.91307e+08	2.98592e+08	2.62597e+08	2.21652e+08	1.56054e+08	1.34234e+08	7.27913e+07	1.37394e+09	3.27286e+08
3-[2-(Benzyloxy)-3,6-dimethoxyphenyl]-1H-pyrazole	7.02212e+07	1.66511e+08	8.60931e+07	4.17482e+07	3.41272e+07	8.64756e+07	1.27782e+08	1.02803e+08	6.42539e+07	8.48392e+07	4.5922e+07	1.15167e+08	1.50568e+08	1.29167e+08	2.00709e+08	3.57606e+07	1.64267e+08	4.04563e+08	1.31345e+08	9.49678e+07	1.18129e+08	6.60437e+07	1.28106e+08	7.85869e+07	1.16007e+08	2.74431e+08	9.00477e+07	1.31399e+08
3-amino-2-phenyl-2H-pyrazolo[4,3-c]pyridine-4,6-diol	1.32004e+08	1.39045e+08	4.75401e+08	1.79107e+08	2.30785e+08	1.75271e+08	2.27404e+08	2.80383e+08	3.00377e+08	2.62297e+08	1.31604e+09	7.28921e+08	3.44472e+09	4.83515e+08	1.18904e+09	9.63496e+08	3.57892e+09	3.28584e+09	1.83723e+09	7.23275e+08	3.12638e+08	2.38387e+09	2.80219e+09	2.04666e+09	5.38989e+08	2.01482e+09	1.42732e+09	1.63224e+09
3-hydroxy-8-methoxy-3-methyl-1,2,3,4,7,12-hexahydrotetraphene-1,7,12-trione	6.95901e+07	3.50995e+08	6.21567e+07	2.56971e+08	5.43683e+07	1.99579e+08	9.48231e+07	1.97479e+08	9.8408e+07	1.83939e+08	1.51292e+08	8.68992e+07	8.16812e+07	1.05136e+08	3.01938e+08	2.40634e+08	2.67535e+08	5.03547e+07	1.64125e+08	6.34046e+07	4.468e+07	6.62683e+07	9.18922e+07	8.51808e+07	1.48145e+08	1.68698e+08	6.04663e+07	6.28927e+07
3-tert-Butyladipic acid	2.10358e+09	3.38815e+09	1.67725e+09	2.54006e+09	2.47479e+09	3.10843e+09	4.2023e+09	3.76944e+09	2.25961e+09	4.5331e+09	8.20374e+09	3.88253e+09	1.98539e+10	4.04248e+09	1.80469e+10	1.62035e+10	1.12651e+10	8.71397e+09	8.44497e+09	3.53097e+09	6.27948e+09	6.9286e+09	4.16309e+09	3.77498e+09	3.08771e+09	5.63413e+09	5.13591e+09	8.81113e+09
4'-Methoxy-pyrrolidinopropiophenone	6.96169e+08	1.90307e+08	2.79602e+08	3.26824e+08	3.38898e+08	4.23171e+08	2.0865e+08	3.60545e+08	4.14616e+08	2.97623e+08	2.19828e+08	3.17584e+08	5.59448e+08	2.73817e+08	3.01273e+08	2.94891e+08	2.14348e+08	2.91416e+08	7.81993e+08	3.10827e+08	2.79386e+08	3.08128e+08	3.49256e+08	2.8196e+08	1.63152e+08	3.57766e+08	3.21396e+08	5.63881e+08
4,6-dimethyl-2-morpholinonicotinonitrile	1.84518e+08	4.01843e+08	2.68988e+08	3.53788e+08	5.72194e+08	2.46211e+08	3.37811e+08	3.27259e+08	3.8185e+08	8.04031e+08	2.83028e+08	5.54961e+08	4.74614e+08	4.08216e+08	3.62426e+08	4.17736e+08	3.456e+08	6.63311e+08	2.98756e+08	3.2555e+08	3.98344e+08	2.56308e+08	3.08203e+08	4.56216e+08	2.5926e+08	3.11425e+08	4.74126e+08	6.34964e+08
4,7-dihydroxy-4-(hydroxymethyl)-3,4a,8,8-tetramethyl-1,4,4a,5,6,7,8,8a-octahydronaphthalen-1-one	3.3787e+08	3.10521e+08	4.85727e+08	5.71633e+08	4.23799e+08	4.30341e+08	1.61798e+08	1.93766e+08	3.05569e+07	3.07567e+07	5.0756e+08	5.42846e+08	2.17733e+08	2.42012e+07	1.41618e+08	1.59093e+08	8.0662e+07	8.03026e+07	6.24572e+07	1.46054e+08	4.34881e+07	5.23142e+07	3.8761e+07	4.67738e+07	2.35734e+07	2.93256e+07	2.00945e+07	2.68577e+07
4-(2,6-dimethylphenyl)-5-(7-oxabicyclo[2.2.1]hept-2-yl)-2,4-dihydro-3H-1,2,4-triazole-3-thione	3.66571e+08	4.68378e+08	4.51536e+08	2.42015e+08	6.31714e+08	9.78441e+08	3.42153e+08	2.91579e+08	8.74343e+08	5.81271e+08	2.63984e+08	2.90444e+08	7.81238e+08	5.97331e+08	4.01059e+08	4.43626e+08	2.57359e+08	3.4623e+08	5.23035e+08	1.33091e+09	8.28963e+08	2.11925e+08	3.84342e+08	3.04379e+08	1.72004e+08	3.50581e+08	6.56436e+08	1.4591e+09
4-(4,5-dihydro-1H-imidazol-2-yl)-2,6-dimethylmorpholine hydrobromide	6.33043e+08	1.34173e+09	1.04908e+09	2.02804e+09	2.80295e+09	1.8052e+09	1.83655e+09	1.86615e+09	1.64097e+09	3.7977e+09	9.86093e+08	2.36994e+09	2.28136e+09	1.19752e+09	2.31434e+09	1.60637e+09	2.12617e+09	3.82266e+09	1.85408e+09	1.42633e+09	1.92169e+09	1.20377e+09	1.96715e+09	1.30725e+09	1.15596e+09	1.83618e+09	2.30959e+09	2.35433e+09
4-(Methylthio)-6-(4-pyridyl)-1,3,5-triazin-2-amine	8.724e+09	4.7954e+09	1.37503e+08	3.25267e+09	2.5631e+08	1.83221e+08	4.70815e+09	5.08373e+09	5.79788e+09	5.65299e+08	3.94003e+09	5.45073e+09	2.28777e+09	9.11917e+09	4.73315e+09	7.42738e+09	2.6398e+09	1.42469e+09	4.59658e+09	2.30051e+09	5.49352e+08	1.69661e+09	1.78831e+09	1.41213e+09	2.17409e+09	7.32111e+09	3.61852e+09	1.19567e+09
4-(ethoxymethylidene)-7-methoxy-2-phenyl-1,2,3,4-tetrahydroisoquinoline-1,3-dione	3.10302e+08	3.60368e+08	1.73823e+07	1.31156e+08	3.63674e+08	2.50106e+08	2.4098e+08	2.68722e+08	1.93838e+07	1.74413e+07	3.15881e+08	9.69195e+08	1.4532e+07	1.88371e+07	7.01115e+08	4.44542e+08	1.28606e+07	2.40925e+08	2.22284e+09	1.27728e+08	2.93628e+08	2.2011e+08	6.44578e+07	3.0523e+08	2.45966e+08	1.22128e+08	2.58169e+09	1.00604e+10
4-(hydroxymethyl)benzoic acid	2.89835e+09	1.24287e+09	1.13732e+10	5.05984e+10	1.74021e+09	1.78513e+09	1.02326e+09	2.03813e+09	1.27834e+09	2.59214e+10	3.63159e+10	1.47039e+09	4.61419e+10	1.67879e+09	1.88668e+09	7.17311e+10	1.76723e+09	2.14153e+09	2.06379e+09	1.76418e+09	1.51363e+09	1.91539e+09	1.6946e+10	2.60495e+09	1.41017e+09	1.97921e+09	8.64317e+08	1.61591e+10
4-(methylthio)-6-phenyl-2-(3-pyridyl)pyrimidine-5-carbonitrile	2.96067e+09	2.35139e+09	1.37093e+09	2.08e+09	2.07119e+09	1.5219e+09	2.29987e+09	1.69747e+08	1.88875e+09	2.03745e+09	1.58692e+09	1.46e+09	2.44521e+09	3.42088e+09	1.68111e+09	4.01653e+09	6.39053e+09	2.7418e+09	1.1447e+09	1.65943e+09	1.72823e+09	2.9121e+09	3.22154e+09	1.34575e+09	1.00073e+09	3.10751e+09	8.87617e+08	3.10855e+09
4-(octyloxy)benzoic acid	2.40948e+08	2.75989e+08	2.79597e+08	3.69266e+08	2.72177e+08	4.51655e+08	1.22804e+08	2.11115e+08	3.3795e+08	2.19304e+08	2.83188e+08	2.80542e+08	3.54434e+08	3.34998e+08	3.04817e+08	4.31598e+08	3.32333e+08	4.93501e+08	3.49722e+08	4.2843e+08	2.44282e+08	3.59035e+08	2.89518e+08	3.26537e+08	3.86541e+08	2.44413e+08	3.56828e+08	1.81965e+08
4-(pentyloxy)benzene-1-carbohydrazide	8.58481e+08	1.15917e+09	7.51839e+08	8.88394e+08	1.17131e+09	1.13511e+09	7.48528e+08	9.11528e+08	9.48782e+08	9.70151e+08	9.17022e+08	8.28296e+08	1.11198e+09	1.29523e+09	1.79494e+09	8.16689e+08	1.28355e+09	1.19597e+09	8.8133e+08	1.87477e+09	1.00783e+09	9.15315e+08	1.29865e+09	1.03998e+09	6.16259e+08	1.39706e+09	1.31796e+09	1.91776e+09
4-Chlorophenol	2.9209e+09	4.56415e+09	2.31591e+09	3.9203e+09	4.61864e+09	4.65408e+09	4.12632e+09	4.06626e+09	1.36374e+09	6.09882e+09	5.92455e+09	5.80196e+09	5.19512e+09	5.25078e+09	5.42027e+09	6.08924e+09	3.47638e+09	3.71158e+09	5.84279e+09	3.17352e+09	3.77618e+09	4.1685e+09	3.67036e+09	5.03179e+09	3.79535e+09	3.0808e+09	5.25118e+09	5.17051e+09
4-Dodecylbenzenesulfonic acid	4.72648e+09	4.48119e+09	6.21435e+09	4.99344e+09	4.3554e+09	4.80349e+09	4.55222e+09	2.78758e+10	4.36037e+09	4.84161e+09	4.63315e+09	4.61585e+09	5.15882e+09	3.7873e+09	4.44655e+09	4.96819e+09	4.26511e+09	4.91181e+09	4.40913e+09	4.46723e+09	4.31068e+09	5.16227e+09	3.1744e+09	4.48066e+09	4.78818e+09	5.87053e+09	3.70674e+09	3.89828e+09
4-Ethylphenol	4.68856e+09	1.65366e+10	1.06427e+08	2.20589e+10	1.07513e+08	1.16496e+08	8.42147e+07	6.32274e+09	1.1918e+08	3.71905e+10	2.42841e+10	1.76844e+10	4.38896e+10	1.8515e+10	3.12457e+10	2.54686e+10	2.40101e+10	3.54164e+10	3.42094e+10	2.26323e+10	2.64212e+10	2.52515e+10	1.62087e+10	2.71264e+10	1.54986e+10	1.56284e+10	3.00216e+09	6.37559e+09
4-Ethynylaniline	8.962e+09	6.76922e+09	8.59792e+09	7.27793e+09	5.62487e+09	4.7887e+09	4.73803e+09	5.03395e+09	7.44996e+09	5.96314e+09	4.3231e+09	5.34724e+09	2.17027e+09	7.24156e+09	2.84456e+09	7.74783e+09	2.87558e+09	2.05608e+09	5.86529e+09	1.33673e+09	1.67122e+09	1.5999e+09	2.69756e+09	2.5616e+09	2.04571e+09	8.5446e+09	6.31655e+09	8.16802e+09
4-Hexyloxyaniline	7.62746e+08	7.56361e+08	7.93634e+08	8.28904e+08	7.701e+08	7.04678e+08	7.24481e+08	8.69818e+08	8.59503e+08	8.97994e+08	7.59954e+08	7.75103e+08	1.08323e+09	7.17117e+08	8.46887e+08	9.71999e+08	6.18222e+08	8.40427e+08	8.9697e+08	7.59293e+08	8.37214e+08	7.74119e+08	8.59733e+08	1.1422e+09	9.75112e+08	6.96062e+08	8.66494e+08	8.18267e+08
4-Hydroxybenzaldehyde	1.42371e+10	2.00233e+10	1.68542e+10	3.1167e+10	1.52354e+10	1.31523e+10	1.15457e+10	1.64403e+10	1.87427e+10	2.08666e+10	3.04956e+10	1.52862e+10	3.59437e+10	1.91316e+10	3.41178e+10	2.47322e+10	3.48106e+10	1.73304e+10	2.58882e+10	2.22901e+10	2.57826e+10	1.9114e+10	1.72329e+10	2.40557e+10	2.41986e+10	2.31107e+10	1.63759e+10	2.69124e+10
4-Hydroxybenzoic acid	3.766e+09	6.44822e+09	4.83619e+09	4.9229e+09	5.5019e+09	4.43183e+09	6.01075e+09	5.26766e+09	3.86379e+09	9.49658e+09	8.49565e+09	3.5302e+09	4.44455e+09	5.69308e+09	9.32991e+09	5.09582e+09	3.05361e+09	1.462e+10	3.96221e+09	4.89407e+09	1.24566e+10	3.90732e+09	2.83441e+09	6.75159e+09	4.38242e+09	8.77657e+09	4.66056e+09	9.82373e+09
4-Hydroxyphenylacetic acid	1.94844e+10	2.64336e+10	8.03977e+09	2.02103e+10	2.49716e+10	1.0138e+10	9.96881e+09	2.75397e+10	8.94991e+09	7.50147e+09	2.25018e+10	5.12334e+10	1.20027e+10	6.22932e+09	9.79581e+09	1.86219e+10	2.22282e+10	2.92082e+10	4.38085e+10	3.18965e+10	2.20944e+10	1.79662e+10	6.78971e+09	2.86282e+10	3.24624e+10	1.01097e+10	3.8126e+10	4.25625e+10
4-Hydroxyphenylpyruvic acid	8.17004e+08	1.30174e+09	8.78529e+08	3.83518e+08	2.0855e+09	1.52532e+09	5.13226e+08	8.18148e+08	7.22414e+08	6.69317e+08	7.07562e+08	4.8254e+08	5.43748e+08	7.44856e+08	7.47536e+08	6.42351e+08	5.77737e+08	1.35303e+09	7.8097e+08	5.36051e+08	7.36227e+08	5.4068e+08	4.64135e+08	5.94944e+08	2.80152e+08	4.5258e+08	2.44071e+09	2.58081e+09
4-Indolecarbaldehyde	8.71603e+09	1.77984e+10	1.09946e+10	2.37939e+10	8.60594e+09	1.25691e+10	7.63139e+09	1.57566e+10	1.3214e+10	1.95019e+10	1.3643e+10	1.20967e+10	1.47082e+10	1.40343e+10	2.333e+10	1.80472e+10	1.87484e+10	1.1336e+10	1.87574e+10	1.52755e+10	2.1512e+10	1.19525e+10	1.09307e+10	1.78329e+10	1.25892e+10	1.48821e+10	9.35249e+09	1.03973e+10
4-Methoxybenzaldehyde N-[6-(tert-butyl)thieno[3,2-d]pyrimidin-4-yl]hydrazone	6.4032e+09	8.29129e+09	1.49932e+09	9.66702e+09	7.6497e+09	4.24053e+09	6.31822e+09	9.945e+07	5.66283e+08	6.43636e+07	4.27612e+09	6.51869e+09	9.78673e+07	7.74561e+09	2.16968e+09	5.25207e+09	3.55295e+09	3.08575e+09	2.64194e+09	7.73869e+09	5.84017e+09	4.38813e+09	5.88444e+09	7.34881e+09	8.77684e+09	6.50218e+09	4.23226e+09	4.26179e+09
4-Methyl-5-thiazoleethanol	4.05286e+09	4.28722e+09	6.26562e+09	8.61751e+09	1.17578e+10	3.5002e+10	2.08287e+10	1.10853e+10	2.32272e+10	6.14966e+09	6.95865e+09	1.00883e+10	6.82785e+09	3.26908e+09	7.8624e+09	4.9368e+09	1.08155e+10	1.16017e+10	5.38755e+09	3.14735e+10	5.46003e+09	5.15055e+09	4.27337e+09	5.43309e+09	5.1841e+09	6.74617e+09	5.62681e+09	7.46544e+09
4-Methylbenzophenone	2.95128e+07	2.1905e+07	2.10065e+07	2.24908e+07	1.80969e+07	2.53612e+07	1.94236e+07	3.04822e+07	2.12963e+07	3.49545e+07	2.32413e+07	3.29376e+07	2.53286e+07	2.30605e+07	2.39563e+07	2.41861e+07	2.02903e+07	1.75876e+07	2.6237e+07	3.11052e+07	2.09688e+07	2.91911e+07	1.8835e+07	2.09453e+07	2.43747e+07	3.1944e+07	3.48046e+07	2.90143e+07
4-Methylcatechol	3.70521e+08	5.36518e+08	3.53149e+08	5.67924e+08	6.41004e+08	2.81265e+08	3.3667e+08	4.24636e+08	4.07907e+08	4.50632e+08	1.3161e+09	5.19181e+08	3.42757e+08	3.18074e+08	5.01032e+08	3.49838e+08	2.67537e+08	4.32132e+08	5.58729e+08	5.7503e+08	4.02081e+08	2.99599e+08	2.15941e+08	7.91972e+08	2.45925e+08	2.80707e+08	3.26684e+08	1.17828e+09
4-Methylhippuric acid	1.59872e+09	1.69671e+09	1.74295e+09	2.1597e+09	1.50526e+09	1.25679e+09	1.75082e+09	2.20145e+09	2.23935e+09	2.32353e+09	1.35795e+09	1.50698e+09	1.50553e+09	2.55834e+09	2.76528e+09	2.71063e+09	2.03804e+09	1.76383e+09	1.63689e+09	1.25743e+09	8.51549e+08	1.36493e+09	1.82513e+09	1.04443e+09	1.10404e+09	2.52649e+09	1.70261e+09	1.74786e+09
4-Methylphenol	1.16473e+10	1.59615e+10	1.47944e+10	4.49626e+10	1.785e+10	6.98475e+09	6.23832e+09	1.57369e+10	5.11954e+09	9.88275e+09	4.3954e+10	2.99506e+10	2.98481e+10	4.38713e+09	6.11404e+09	3.92911e+10	1.64495e+10	1.8979e+10	2.63187e+10	1.80786e+10	1.75147e+10	1.4856e+10	9.71086e+09	2.38623e+10	1.89783e+10	6.22639e+09	2.42221e+10	5.07208e+10
4-Oxoproline	7.1764e+09	2.84031e+09	3.94057e+09	4.84405e+09	4.70707e+09	7.36702e+09	4.41153e+09	4.22945e+09	9.24132e+09	5.14196e+09	5.66538e+09	5.24491e+09	3.02795e+09	7.96487e+09	6.07236e+09	5.42741e+09	3.60129e+09	3.57388e+09	5.277e+09	2.65273e+09	9.51531e+09	2.58978e+09	2.16135e+09	2.53236e+09	2.4327e+09	6.23021e+09	6.53648e+09	6.26855e+09
4-Pentylaniline	7.65531e+08	7.73751e+08	6.89209e+08	6.40424e+08	6.53421e+08	7.46179e+08	6.23193e+08	7.71584e+08	7.49561e+08	7.96599e+08	6.8315e+08	6.62122e+08	6.46779e+08	8.15473e+08	8.93871e+08	7.29778e+08	7.19557e+08	6.94384e+08	8.44092e+08	7.91676e+08	7.34171e+08	7.75936e+08	6.20325e+08	1.42379e+08	6.82578e+08	7.15664e+08	7.13433e+08	8.62072e+08
4-Phenolsulfonic acid	2.35114e+08	2.5387e+07	6.69139e+08	4.07736e+08	4.83923e+08	5.11856e+08	1.47828e+09	8.83698e+08	6.59202e+09	3.57857e+08	4.74756e+07	6.80242e+08	1.28397e+08	1.18367e+09	4.23138e+08	2.53603e+07	1.72986e+08	7.01363e+07	8.92789e+08	3.86919e+08	9.20217e+07	2.62425e+09	1.83068e+10	1.68979e+07	4.26191e+07	1.7904e+10	1.17761e+08	1.48687e+08
4-Phenylbutyric acid	5.93808e+07	6.06085e+07	7.64512e+07	8.20219e+07	5.71184e+07	6.50092e+07	5.74555e+07	7.01463e+07	9.76859e+07	4.01339e+08	9.05064e+07	8.13132e+07	9.60902e+07	1.24586e+08	7.07103e+07	1.4982e+08	6.12245e+07	6.0762e+07	2.65346e+08	1.43287e+08	2.92088e+08	1.06708e+08	7.52733e+07	8.88755e+07	1.3924e+08	9.51082e+07	6.84226e+07	1.68443e+08
4-Pyridoxic acid	1.3322e+10	8.78946e+09	1.29514e+10	1.87412e+10	1.03689e+10	7.12788e+09	1.36488e+10	1.37652e+10	8.34157e+09	2.05797e+10	2.23154e+10	1.42533e+10	2.75389e+10	1.03982e+10	1.0016e+10	1.88711e+10	7.19773e+09	1.15609e+10	1.57765e+10	7.92163e+09	1.25387e+10	1.5141e+10	1.29346e+10	1.17466e+10	5.22929e+09	1.6982e+10	1.16926e+10	3.56981e+10
4-[(5-hydroxy-3-methyl-1-phenyl-1H-pyrazol-4-yl)methylidene]-3-methyl-1-phenyl-4,5-dihydro-1H-pyrazol-5-one	5.43121e+07	1.95203e+08	5.76423e+07	2.44636e+08	1.92915e+08	1.54869e+08	1.90589e+08	6.05328e+08	2.38484e+08	2.26453e+08	2.06178e+08	2.81385e+08	3.28838e+08	1.82264e+08	3.48465e+08	1.51995e+08	1.78361e+08	4.54736e+08	3.18756e+08	3.65585e+08	3.76802e+08	2.32478e+08	2.61005e+08	3.23286e+08	1.28202e+08	2.31629e+08	2.74286e+08	1.45219e+08
4-[(dimethylamino)methylene]-5-phenyl-2,4-dihydro-3H-pyrazol-3-one	6.17423e+08	7.13774e+08	6.29001e+08	8.71864e+08	6.4006e+08	7.01398e+08	6.713e+08	6.97373e+08	6.05187e+08	7.25969e+08	7.39166e+08	5.8086e+08	6.36878e+08	4.99578e+08	7.96919e+08	5.56237e+08	6.41518e+08	7.02749e+08	5.90084e+08	4.98503e+08	6.90175e+08	3.91894e+08	6.01223e+08	5.56562e+08	2.08362e+08	5.50895e+08	5.14967e+08	5.61755e+08
4-[2-(2,3-Dihydroxy-5,6,8a-trimethyloctahydro-2H-spiro[naphthalene-1,2'-oxiran]-5-yl)ethyl]-5-hydroxy-2(5H)-furanone	1.27569e+08	2.28755e+08	2.10562e+08	2.91285e+08	1.40214e+08	2.2031e+08	1.99148e+08	2.64249e+08	1.95397e+08	6.36471e+08	1.66287e+08	2.42813e+08	4.08127e+08	2.82351e+08	2.45793e+08	3.34655e+08	2.08054e+08	1.89462e+08	2.57191e+08	5.6305e+08	1.61523e+08	1.30178e+09	2.20364e+08	3.28732e+08	6.79067e+08	2.64696e+08	5.4543e+08	5.23389e+08
4-[4-morpholino-6-(1,2,3,4-tetrahydroquinolin-1-yl)-1,3,5-triazin-2-yl]morpholine	3.66603e+09	3.79081e+09	2.33161e+09	1.89675e+09	3.92912e+09	1.82388e+09	3.20371e+09	2.10163e+09	2.14548e+09	4.9165e+08	1.98455e+09	1.60379e+09	3.50804e+09	3.25798e+09	3.96372e+09	2.50529e+09	3.99539e+09	3.33319e+09	2.66851e+09	2.12761e+09	4.68941e+09	3.40822e+09	1.52534e+09	1.80468e+09	2.92248e+09	2.45623e+09	1.92238e+09	1.06086e+09
4-ethoxy-6,7-dimethoxyquinazoline	1.33463e+07	1.2273e+09	1.30534e+07	6.18519e+07	1.39747e+07	1.06235e+09	3.29845e+07	1.50733e+07	1.48869e+07	1.64842e+09	1.29853e+09	2.05724e+07	1.26149e+09	3.10987e+07	1.24372e+09	1.70879e+07	1.04594e+09	2.09094e+07	5.68057e+07	9.00708e+08	2.71938e+07	1.11844e+09	9.85462e+06	2.26188e+07	7.52657e+08	1.71829e+07	1.13976e+09	1.02775e+09
4-oxo-4,5,6,7-tetrahydrobenzo[b]furan-3-carboxylic acid	4.88007e+09	5.9983e+09	3.93385e+09	1.02327e+09	7.77762e+09	4.6444e+09	4.50181e+09	5.29799e+09	5.38032e+09	5.14273e+08	5.55305e+08	6.93662e+08	3.61623e+08	9.87573e+08	8.94301e+08	7.77274e+08	1.43597e+09	1.93142e+08	8.38197e+08	5.60249e+08	5.77086e+08	3.64643e+08	2.52961e+08	6.04369e+08	3.3324e+09	5.83262e+08	6.85957e+09	1.53547e+10
4-sec-Butylphenol	5.5389e+08	6.92477e+08	6.06975e+08	8.343e+08	5.8937e+08	6.29744e+08	4.08019e+07	2.10333e+07	5.57528e+08	7.48042e+08	2.65561e+07	7.07914e+08	1.96931e+07	5.93642e+08	1.41048e+07	1.65171e+07	1.1501e+07	4.2483e+07	9.56415e+06	6.12689e+08	2.93358e+07	1.38041e+07	1.30516e+07	1.92713e+07	1.14482e+07	2.02652e+07	8.20968e+08	2.20008e+07
4-{5-[(3S)-1-Isopropyl-3-pyrrolidinyl]-1,3,4-oxadiazol-2-yl}pyridine	1.03374e+09	1.85956e+08	1.59421e+08	1.60658e+09	1.87911e+09	1.11833e+09	2.07098e+08	2.65542e+08	1.82397e+08	1.89944e+09	2.40329e+09	1.65577e+09	8.00309e+09	1.80437e+09	4.29851e+09	1.98301e+08	1.74677e+09	3.88625e+09	4.91861e+09	1.92081e+09	2.18883e+09	6.94874e+08	1.36585e+09	2.19047e+09	1.4909e+09	1.80086e+09	1.44825e+09	2.73284e+09
4-{6-[2-(4-carboxyphenyl)-1H-benzo[d]imidazol-5-yl]-1H-benzo[d]imidazol-2-yl}benzoic acid	7.20913e+07	6.22318e+07	2.93772e+07	5.15004e+07	2.26723e+08	9.78577e+07	1.17089e+08	2.05745e+08	2.30523e+08	7.52313e+07	1.35014e+08	1.37663e+08	2.23556e+08	5.64621e+07	1.68959e+08	1.87102e+08	6.60666e+07	2.91536e+08	1.75341e+07	1.34326e+08	1.75245e+08	1.08921e+08	1.79957e+08	1.37024e+08	9.16484e+07	1.01043e+08	2.18534e+08	1.38049e+08
5'-S-Methyl-5'-thioadenosine	4.22351e+09	4.96146e+08	4.22333e+09	4.06996e+09	3.68538e+09	2.71409e+09	3.48906e+09	4.31413e+09	6.14235e+09	2.94746e+09	5.1434e+09	6.66204e+09	7.31234e+09	5.4509e+09	4.463e+08	1.0078e+10	7.90672e+08	5.23275e+09	1.07475e+10	6.91394e+09	4.74028e+09	6.46229e+09	3.57478e+09	5.56247e+09	3.60769e+09	1.52453e+09	6.93545e+09	6.2496e+09
5(Z),8(Z),11(Z)-Eicosatrienoic acid ethanolamide	1.81503e+08	2.05016e+08	1.34739e+08	2.0944e+08	2.31854e+08	2.53265e+08	1.74511e+08	2.62755e+08	4.61875e+08	1.14732e+08	1.54722e+08	1.09285e+08	1.87394e+08	3.26761e+08	5.96437e+07	1.1689e+08	8.2544e+07	1.33185e+08	8.46521e+07	3.55783e+08	1.27201e+08	2.0463e+08	1.95557e+08	1.54399e+08	8.68304e+07	3.24496e+08	4.53341e+08	7.99388e+07
5,5'-[(6Z)-6-Tetradecene-1,14-diyl]bis(1,3-benzenediol)	3.38159e+10	3.70659e+10	3.50724e+10	3.99451e+10	2.317e+10	2.20865e+10	1.85049e+10	2.32511e+10	3.94145e+10	2.36448e+10	5.20177e+10	5.01075e+10	6.99065e+10	5.02881e+10	3.88791e+10	4.1765e+10	5.4706e+10	2.24344e+09	6.362e+10	5.85755e+10	4.61916e+10	6.58917e+10	4.55678e+10	4.40812e+10	4.19944e+10	1.89906e+10	1.19784e+10	1.02599e+10
5,7-dihydroxy-3-(4-hydroxyphenyl)-4H-chromen-4-one	3.01734e+09	1.74564e+09	7.06793e+09	1.45442e+09	1.12698e+10	7.77445e+09	6.72724e+09	1.42338e+09	1.9299e+10	1.76663e+09	2.62095e+10	6.11887e+09	1.20696e+09	6.5945e+09	4.62128e+08	1.29936e+09	4.19025e+09	3.40617e+09	4.64931e+08	2.06155e+09	1.21128e+10	1.06154e+10	4.19087e+09	1.73912e+09	2.32959e+09	5.29286e+09	6.61867e+09	1.24982e+09
5-(1-Adamantyl)-4H-1,2,4-triazole-3-thiol	1.44076e+09	3.44387e+09	3.47497e+09	1.47691e+09	4.94302e+09	3.25258e+09	7.73222e+08	5.45021e+08	4.24988e+09	2.95581e+09	4.75637e+09	2.63763e+09	1.46719e+09	5.51783e+09	4.79417e+09	7.40757e+08	7.83438e+09	2.1724e+09	1.63818e+08	7.12263e+09	7.60883e+09	8.33604e+09	1.34574e+10	3.62941e+09	1.49017e+10	3.56162e+09	9.37656e+09	2.45979e+09
5-({[3-chloro-5-(trifluoromethyl)-2-pyridyl]methyl}thio)-4-pentyl-4H-1,2,4-triazol-3-ol	7.75558e+09	5.00668e+09	7.86011e+09	1.16373e+10	4.45968e+09	6.37169e+09	1.41388e+10	9.19961e+09	8.16062e+09	1.1552e+10	7.22693e+09	7.7383e+09	6.91016e+09	1.48262e+10	1.56498e+10	7.36826e+09	1.1084e+10	8.66471e+09	7.68117e+09	6.05183e+09	8.33052e+09	6.82392e+09	8.66209e+09	6.71719e+09	1.00822e+10	6.32555e+09	8.52214e+09	7.55732e+09
5-Aminovaleric acid	7.76186e+10	7.1604e+10	9.71053e+10	7.73995e+10	5.64679e+10	4.61508e+10	4.58103e+10	5.36241e+10	2.1471e+11	6.47432e+10	1.06891e+11	5.87491e+10	4.6959e+10	9.65136e+10	9.40471e+10	8.35027e+10	5.43888e+10	2.71567e+10	1.21173e+11	2.72438e+10	4.01307e+10	4.12225e+10	3.86214e+10	2.1664e+10	2.41795e+10	8.67022e+10	7.5624e+10	9.87377e+10
5-Fluoro CUMYL-P7AICA	2.04222e+08	2.20485e+08	1.09507e+09	1.36122e+08	3.1012e+08	3.27048e+08	2.48799e+08	1.29512e+08	2.10027e+08	2.15075e+08	2.78181e+08	2.52966e+08	6.01432e+08	2.88116e+08	7.06516e+08	1.17872e+08	1.32195e+09	9.38418e+08	3.37906e+08	1.37544e+08	8.99329e+08	3.29602e+08	4.31649e+08	1.55158e+08	5.29045e+08	2.58674e+08	2.3639e+08	1.39439e+09
5-Fluoro SDB-006	1.13894e+09	6.59985e+08	7.76201e+08	1.46093e+09	1.20351e+09	7.26137e+08	2.67654e+08	7.13115e+08	7.72697e+08	1.73878e+09	1.85036e+09	9.98432e+08	1.31207e+09	1.18936e+09	1.70242e+09	1.12934e+09	1.82717e+08	3.68615e+08	6.30085e+08	2.43317e+08	2.05909e+08	3.37772e+08	2.61957e+08	1.50863e+09	9.86038e+08	9.08258e+08	1.04805e+09	1.38131e+09
5-Fluoro-3,5-AB-PFUPPYCA	8.56368e+08	1.07972e+09	9.45493e+08	1.25426e+09	1.08208e+09	1.85473e+09	1.10917e+09	1.51327e+09	9.1976e+08	1.06494e+09	1.65811e+09	2.19207e+09	1.14443e+09	1.01838e+09	1.26617e+09	1.10514e+09	9.99358e+08	1.62735e+09	8.66964e+08	8.28094e+08	9.03477e+08	7.23666e+08	9.12491e+08	8.67266e+08	1.15704e+09	8.08053e+08	1.02107e+09	1.22998e+09
5-Henicosyl-1,3-benzenediol	5.24874e+07	3.424e+07	8.39372e+07	7.2049e+07	6.57888e+07	4.78803e+07	5.00028e+07	4.5535e+07	4.71998e+07	4.88929e+07	5.59386e+07	6.76761e+07	9.99596e+07	2.36211e+07	4.65535e+07	5.90847e+07	5.17368e+07	7.47556e+07	6.09163e+07	7.18399e+07	5.93734e+07	6.70677e+07	5.70548e+07	5.01324e+07	6.78765e+07	5.97203e+07	3.07348e+07	3.60113e+07
5-Hydroxyindole-3-acetic acid	8.91777e+10	1.4398e+11	1.03882e+11	1.17142e+11	1.36282e+11	1.24759e+11	1.25957e+11	1.28254e+11	1.18031e+11	1.95319e+11	1.54807e+11	1.12482e+11	1.78538e+11	1.74709e+11	1.47039e+11	1.46491e+11	1.4538e+11	2.16093e+11	1.64998e+11	1.35816e+11	2.12654e+11	1.85771e+11	1.09157e+11	1.65256e+11	1.10156e+11	1.6728e+11	1.51557e+11	1.2738e+11
5-Hydroxylysine	1.50025e+09	1.90596e+09	1.57654e+09	1.60715e+09	1.67409e+09	1.47586e+09	1.37026e+09	1.58401e+09	2.37206e+09	1.33489e+09	2.72535e+08	3.63987e+08	1.72898e+08	1.21674e+09	2.62662e+09	1.44855e+09	1.31023e+09	1.94989e+09	4.64121e+08	7.62505e+08	1.45555e+09	1.51007e+08	1.70023e+08	1.45811e+08	1.38517e+08	2.98743e+08	2.96268e+08	2.92943e+08
5-Methoxyindole	8.88097e+09	1.27235e+10	9.8083e+09	1.1891e+10	1.26743e+10	1.0304e+10	1.16456e+10	1.14093e+10	1.17257e+10	1.6179e+10	1.32351e+10	9.19247e+09	1.47037e+10	1.40769e+10	1.45606e+10	1.50349e+10	1.05405e+10	1.62574e+10	1.37838e+10	1.08665e+10	1.55214e+10	1.33824e+10	1.06133e+10	1.3573e+10	8.47726e+09	1.42742e+10	1.23126e+10	1.03894e+10
5-Methyl-1-phenyl-4-[1-(thien-2-oyl)pyrazol-5-yl]pyrazole	2.59015e+09	1.77412e+09	1.97556e+09	1.56057e+09	1.79512e+09	1.30766e+09	2.82535e+09	2.43947e+09	1.01902e+09	3.31291e+09	2.33968e+09	1.7585e+09	1.73428e+09	3.83393e+09	2.17139e+09	3.27309e+09	3.7949e+09	3.00247e+09	2.15038e+09	1.71022e+09	3.55166e+09	3.68519e+09	2.61438e+09	1.91687e+09	9.89086e+08	1.47675e+09	1.319e+09	1.39756e+09
5-[(10Z)-14-(3,5-dihydroxyphenyl)tetradec-10-en-1-yl]benzene-1,3-diol	1.83201e+09	2.84212e+09	1.92702e+09	1.73437e+09	4.93516e+09	1.49733e+09	1.46533e+09	1.31727e+09	1.98784e+09	1.79606e+09	2.98082e+09	2.13848e+09	2.72661e+09	2.10008e+09	2.16359e+09	2.08527e+09	1.71557e+09	1.23204e+09	3.50986e+09	4.27214e+09	3.2161e+09	3.76777e+09	5.27881e+09	3.42385e+09	1.72224e+09	1.36609e+09	1.54098e+09	1.3004e+09
5-[(1S,2R,4aR)-5-(Hydroxymethyl)-1,2,4a-trimethyl-1,2,3,4,4a,7,8,8a-octahydro-1-naphthalenyl]-3-methylpentanoic acid	4.14585e+08	2.60784e+08	2.72076e+08	3.02428e+08	1.94637e+08	2.57086e+08	2.27177e+08	2.06426e+08	1.20253e+08	2.42803e+08	3.11952e+08	2.52277e+08	3.29573e+08	3.60623e+08	2.47386e+08	3.29012e+08	1.82269e+08	2.62144e+08	1.01771e+08	1.48983e+08	1.82651e+08	3.60136e+08	2.51839e+08	2.89012e+08	2.98033e+08	3.96657e+08	2.9528e+08	2.68895e+08
5-[(3Z)-5-Hydroxy-3-methyl-3-penten-1-yl]-1,4a-dimethyl-6-methylenedecahydro-1-naphthalenecarboxylic acid	1.57973e+08	1.00691e+08	1.20948e+08	2.79639e+07	7.24485e+07	1.12013e+08	8.96486e+07	1.21416e+08	1.69638e+08	1.90287e+08	1.15758e+08	1.14373e+08	1.28373e+08	1.26078e+08	1.80804e+08	2.0215e+08	1.02011e+08	1.40305e+08	1.22044e+08	8.23269e+07	2.18145e+08	9.54507e+07	1.55918e+08	1.38782e+08	9.11015e+07	1.53882e+08	2.96775e+08	2.31955e+08
5-[(Z)-Pentadec-8-enyl]benzene-1,3-diol	3.39431e+07	3.71227e+07	3.70432e+07	5.4865e+07	4.60962e+07	6.1716e+07	3.53255e+07	3.17733e+07	5.49183e+07	4.55846e+07	2.08167e+07	6.18817e+07	1.57157e+07	3.51173e+07	2.76444e+07	6.04112e+07	2.2054e+07	2.17847e+07	3.55436e+07	3.20589e+07	2.34597e+07	3.8706e+07	3.01434e+07	5.23559e+07	3.27884e+07	3.93853e+07	5.67693e+07	4.3987e+07
5-[({(2R,4S,5R)-5-[1-Methyl-3-(2-thienyl)-1H-pyrazol-5-yl]-1-azabicyclo[2.2.2]oct-2-yl}methyl)amino]-5-oxopentanoic acid	1.50215e+09	2.88309e+09	4.74859e+08	2.34678e+09	2.16529e+09	2.2796e+09	4.57231e+08	2.16472e+09	1.76255e+09	5.17647e+08	2.24119e+09	2.13886e+09	2.81782e+09	3.2606e+09	2.2991e+09	8.37407e+08	8.76653e+08	1.89581e+09	8.08158e+08	2.27784e+09	1.68769e+09	2.78662e+09	1.50505e+09	1.785e+09	2.88585e+09	1.53014e+09	2.02753e+09	1.86095e+09
5-amino-N'-{[4-(benzyloxy)phenyl]methylene}-1-phenyl-1H-pyrazole-4-carbohydrazide	9.20379e+08	7.30209e+07	1.04932e+08	1.65087e+08	1.12249e+08	2.84897e+07	7.86432e+07	1.89779e+08	1.23634e+08	1.12331e+08	1.96873e+08	1.22054e+07	1.84711e+08	8.64682e+07	6.86533e+07	5.60534e+08	2.30037e+07	8.34821e+06	1.00378e+08	1.54034e+08	7.05923e+07	6.41263e+07	1.89049e+08	1.18966e+08	2.8936e+07	5.23819e+07	1.93151e+07	2.15722e+07
5-hydroxy-2,2,6,6-tetramethyl-4-{2-methyl-1-[2,4,6-trihydroxy-3-(2-methylpropanoyl)phenyl]propyl}cyclohex-4-ene-1,3-dione	8.25379e+09	1.20704e+10	1.11089e+10	1.11065e+10	1.12096e+10	1.1576e+10	1.0937e+10	1.1418e+10	1.05947e+10	1.35791e+10	6.54087e+09	1.03826e+10	1.59899e+10	1.22758e+10	1.39206e+10	6.58285e+09	1.08026e+10	1.37657e+10	1.12818e+10	1.23403e+10	1.40513e+10	1.23347e+10	1.17961e+10	1.1937e+10	1.1803e+10	1.16791e+10	1.23275e+10	1.18496e+10
5-morpholino-2,4(1H,3H)-pyrimidinedione	3.53015e+07	1.33926e+08	1.91554e+08	7.1898e+07	4.59511e+08	7.90939e+08	1.28686e+08	1.79007e+08	2.28284e+08	4.45791e+07	2.99967e+07	5.80957e+07	2.49496e+07	3.71945e+07	8.07015e+07	3.72175e+07	2.82664e+07	3.25139e+07	4.55909e+07	3.20494e+08	2.62476e+08	3.3929e+07	2.36349e+07	1.48224e+08	7.94853e+07	4.11428e+07	3.95643e+07	1.12502e+08
5-Dihydrotestosterone	1.95106e+08	3.19947e+08	2.28762e+08	2.73047e+08	3.08005e+08	4.96823e+08	2.72544e+08	2.49112e+08	2.44805e+08	2.65952e+08	1.88654e+08	2.26004e+08	2.47619e+08	7.98547e+07	1.32845e+08	1.54021e+08	2.34775e+08	1.81028e+08	2.39519e+08	2.72301e+08	3.52563e+08	2.59883e+08	2.06176e+08	2.58484e+08	1.48574e+08	1.44992e+08	2.18977e+08	1.33047e+08
6 -Hydroxycortisol	3.15489e+09	3.29351e+08	3.90995e+09	4.32257e+08	3.65392e+08	3.40412e+08	1.6214e+08	4.91388e+08	2.09687e+09	3.31318e+08	8.56944e+08	9.28799e+07	4.7271e+08	5.06352e+09	3.23172e+08	1.94217e+08	2.4981e+08	3.2397e+08	3.04586e+08	7.89497e+08	4.37625e+08	4.1408e+08	2.63975e+08	2.97899e+08	2.62301e+08	2.48622e+08	4.87108e+08	2.90224e+08
6,7-dihydro-5H-dibenzo[d,f][1,3]diazepin-6-one	8.33275e+07	1.12606e+08	6.98558e+07	7.65926e+07	7.61503e+07	8.49879e+07	6.97641e+07	7.08891e+07	8.625e+07	9.06999e+07	8.77056e+07	1.40403e+08	7.88478e+07	5.42681e+07	7.39911e+07	8.75194e+07	5.57993e+07	8.00516e+07	1.10431e+08	5.69956e+07	4.84066e+07	5.00696e+07	4.04907e+07	5.63935e+07	6.46097e+07	7.2739e+07	6.99365e+07	6.10166e+07
6-(3,4,5-Trimethoxystyryl)-2,3,4,5-tetrahydropyridazin-3-one	1.77795e+08	1.57726e+08	1.66806e+08	1.63944e+08	1.3138e+08	1.25284e+08	1.20996e+08	1.38609e+08	1.67428e+08	1.47475e+08	1.24957e+08	1.40843e+08	7.3167e+07	1.78899e+08	1.87711e+08	1.849e+08	9.68016e+07	7.29468e+07	1.68726e+08	5.97411e+07	6.18551e+07	6.48233e+07	1.02869e+08	7.14225e+07	6.43918e+07	1.85887e+08	1.50838e+08	1.87601e+08
6-(3-Pyridyl)-1,3,5-triazine-2,4-diamine	6.23046e+07	6.35339e+07	2.00637e+08	1.57169e+08	7.41876e+07	8.54967e+07	1.21483e+08	5.4759e+07	6.38422e+07	9.63477e+07	1.07784e+08	7.44329e+07	3.0847e+08	1.56202e+07	7.30328e+07	7.27818e+07	1.09147e+08	7.25986e+07	7.82159e+07	1.77868e+08	6.12205e+07	2.39007e+08	1.0844e+08	2.01937e+08	3.44915e+08	1.3893e+08	5.60134e+07	7.50206e+07
6-(trifluoromethoxy)quinolin-4-ol	1.34087e+11	3.47191e+11	1.69163e+11	1.38549e+11	1.73604e+11	2.67388e+11	1.5825e+11	2.87219e+11	1.71671e+11	3.35561e+11	2.42704e+11	1.51745e+11	3.62309e+11	2.18721e+11	2.43525e+11	1.19498e+11	2.07504e+11	2.62612e+11	2.03087e+11	2.4173e+11	2.65188e+11	4.12994e+11	1.82149e+11	2.81881e+11	2.47136e+11	2.09429e+11	2.01818e+11	1.96007e+11
6-Gingerol	2.96565e+08	3.89616e+08	2.50366e+08	2.19595e+08	2.89047e+08	2.19398e+08	2.43777e+08	2.39014e+08	2.86131e+08	5.07466e+08	4.5266e+08	5.32555e+08	2.28318e+08	1.97805e+08	7.80934e+08	5.22729e+08	4.12367e+08	3.49016e+08	2.44618e+08	1.50343e+08	2.87003e+08	2.35304e+08	2.52118e+08	4.06067e+08	2.0735e+08	2.15644e+08	2.93076e+08	1.41573e+08
6-Hydroxy-1-(hydroxymethyl)-5-{2-[2-(hydroxymethyl)-1-pyrrolidinyl]-2-oxoethyl}-1,4a-dimethyldecahydro-2-naphthalenyl phenylcarbamate	2.14464e+09	1.66047e+09	1.07356e+09	1.12236e+09	5.62788e+08	7.34257e+08	6.57871e+08	1.00039e+09	2.12586e+09	5.29742e+09	4.36709e+09	1.42692e+09	2.1357e+09	6.03108e+08	8.17528e+08	1.66495e+09	7.94437e+08	6.58518e+08	3.96178e+09	1.54372e+09	1.07007e+09	7.38942e+08	8.52511e+09	5.43513e+09	1.10909e+09	1.26385e+09	4.97277e+08	8.80954e+08
6-Hydroxycaproic acid	4.08714e+10	3.95762e+10	2.12515e+10	3.32007e+10	1.03159e+11	1.95252e+10	5.08795e+10	3.95767e+10	4.54716e+10	3.13181e+10	1.87942e+10	4.90884e+10	1.33113e+10	5.74956e+10	2.86092e+10	5.00887e+10	5.23516e+09	1.62808e+10	1.82187e+10	5.85958e+09	6.80843e+09	6.35673e+09	1.80121e+10	2.42588e+10	3.71708e+09	7.32039e+09	4.66187e+10	5.38427e+10
6-Hydroxypicolinic acid	5.51938e+08	2.11581e+09	6.2723e+08	8.41288e+08	2.96781e+09	1.60782e+09	1.42486e+09	1.35976e+09	1.39896e+09	1.5656e+09	1.69096e+09	1.96688e+09	1.32648e+09	2.06082e+09	1.76049e+09	1.08961e+09	1.94444e+09	2.86704e+09	2.32988e+09	1.5733e+09	4.01621e+09	2.60924e+09	2.26295e+09	3.01021e+09	2.04061e+09	2.18334e+09	1.57477e+09	1.28551e+09
6-Methyl[1,2,4]triazolo[4,3-b]pyridazin-8-ol	5.85358e+08	8.89751e+08	1.13571e+09	9.87006e+08	1.39521e+09	1.1383e+09	9.94029e+08	7.63991e+08	7.88375e+08	9.65003e+08	7.81079e+08	1.05419e+09	8.23901e+08	1.17346e+09	1.09936e+09	1.18814e+09	6.21718e+08	1.36519e+09	1.12827e+09	7.53172e+08	7.23256e+08	6.80239e+08	1.51865e+09	1.1007e+09	6.33004e+08	1.08992e+09	1.42449e+09	1.83556e+09
6-[(dimethylamino)methylidene]-6,7,8,9-tetrahydro-5H-benzo[a]cyclohepten-5-one	1.85295e+09	2.61725e+09	2.29346e+09	2.77232e+09	1.89222e+09	2.22185e+09	1.81436e+09	1.9719e+09	3.08012e+09	3.73035e+09	2.88707e+09	2.30118e+09	3.06135e+09	1.73072e+09	2.93375e+09	2.26036e+09	1.15639e+09	3.26979e+09	2.07415e+09	3.03857e+09	3.65391e+09	2.57563e+09	3.02119e+09	1.84105e+09	6.29966e+08	3.1837e+09	1.84276e+09	1.39936e+09
6-amino-1-(2-methylphenyl)-1,2,3,4-tetrahydropyrimidine-2,4-dione	2.65298e+08	3.97515e+08	3.45942e+08	6.20014e+08	3.16512e+08	3.12415e+08	3.35799e+08	4.43532e+08	3.76494e+08	5.54613e+08	3.90777e+08	2.85291e+08	3.95918e+08	3.0526e+08	3.44853e+08	5.79023e+08	4.2462e+08	4.78293e+08	2.4984e+08	6.61422e+08	4.97388e+08	3.16029e+08	3.16011e+08	3.5766e+08	2.1843e+08	3.92746e+08	3.00799e+08	8.58364e+08
6-anilino-1,3-dimethyl-1,2,3,4-tetrahydropyrimidine-2,4-dione	4.20445e+08	6.05214e+08	4.88837e+08	6.12629e+08	5.36129e+08	4.83315e+08	4.38467e+08	5.92778e+08	5.53776e+08	5.7326e+08	5.38353e+08	4.01976e+08	6.33514e+08	4.10775e+08	6.74025e+08	5.57201e+08	4.57475e+08	6.03989e+08	4.87879e+08	5.11356e+08	5.85432e+08	3.9472e+08	4.47073e+08	3.9279e+08	3.52943e+08	4.05837e+08	4.3627e+08	4.89878e+08
6-cyclohexyl-5-(cyclohexylimino)-4-thia-6-azaspiro[2.4]heptan-7-one	1.6546e+09	8.85047e+08	1.1698e+09	6.25144e+08	1.17065e+09	3.45088e+09	9.22849e+08	1.94324e+09	2.67874e+09	1.2989e+09	2.36696e+09	2.00906e+09	9.11499e+08	2.63425e+09	1.10061e+09	1.23727e+09	1.97807e+09	3.93502e+09	2.00467e+09	9.57646e+08	3.5344e+09	1.99503e+09	9.88209e+08	2.30684e+09	1.82186e+09	1.58177e+09	8.72474e+08	2.00465e+09
8(S),15(S)-DiHETE	6.77656e+08	6.72999e+08	7.5969e+08	4.78135e+08	5.93308e+08	6.2151e+08	5.24699e+08	5.31617e+08	4.21835e+08	6.70663e+08	8.33495e+08	6.94659e+08	9.85618e+08	4.83443e+08	6.86272e+08	7.04012e+08	5.343e+08	8.8658e+08	7.08311e+08	5.69103e+08	8.86424e+08	8.77174e+08	6.77944e+08	6.08044e+08	3.93831e+08	7.06873e+08	4.70512e+08	4.37649e+08
8(S)-Hydroxy-(5Z,9E,11Z,14Z)-eicosatetraenoic acid	1.87011e+09	1.40297e+09	3.74204e+08	2.47056e+08	1.19251e+09	5.77454e+08	2.94251e+08	1.28914e+09	2.98161e+08	4.33528e+08	6.86708e+08	1.19711e+09	1.42849e+09	9.01967e+08	1.98712e+08	7.60691e+08	2.39946e+08	7.60565e+08	1.48842e+09	4.14736e+08	2.04172e+08	9.1054e+08	7.60668e+08	1.8151e+09	1.20749e+09	1.83347e+09	6.68297e+08	1.59326e+08
8-(4-Sulfophenyl) octanoic acid	4.2451e+08	2.89751e+08	4.26615e+08	6.09294e+08	2.78884e+08	2.99035e+08	3.63453e+08	2.62964e+08	4.50531e+08	3.21126e+08	3.21143e+08	4.08557e+08	2.60553e+08	3.02396e+08	3.94836e+08	2.95963e+08	2.17742e+08	3.58744e+08	2.4099e+08	3.21993e+08	2.4269e+08	4.17628e+08	5.79039e+08	4.47218e+08	2.83467e+08	3.5813e+08	3.39598e+08	8.41897e+08
8-[(4-methyl-5-phenyl-4H-1,2,4-triazol-3-yl)sulfanyl]-6,7-dihydro-5H-cyclopenta[d][1,2,4]triazolo[1,5-a]pyrimidine	9.04982e+09	1.76579e+09	8.54071e+09	9.43569e+09	1.84399e+09	8.36615e+08	6.18291e+09	4.77791e+09	5.88332e+09	1.38443e+10	8.6898e+09	2.73684e+09	5.7403e+09	3.2245e+09	4.22614e+09	1.55372e+10	8.60491e+09	3.48366e+09	1.4372e+10	4.21616e+09	2.61961e+09	7.41151e+09	1.68196e+10	3.24654e+09	2.98719e+09	2.71264e+09	1.1671e+09	2.04628e+09
8-iso Prostaglandin	1.70322e+09	3.90871e+09	2.30962e+09	4.9513e+09	6.27103e+09	3.41081e+09	6.36927e+09	1.85807e+09	2.78361e+09	2.05069e+09	9.10657e+09	1.98421e+09	4.20312e+09	3.60732e+09	6.11983e+09	4.58217e+09	3.61008e+09	7.52193e+09	4.05937e+09	2.89263e+09	2.96434e+09	6.00911e+09	5.21735e+09	5.3635e+09	3.13204e+09	4.77802e+09	1.62541e+09	1.52693e+09
8-methyl-1,3-diphenyl-5-piperidino-1,2,3,4,7,8-hexahydropyrido[2,3-d]pyrimidine-2,4,7-trione	6.03717e+08	3.62169e+08	4.09621e+08	3.15558e+08	2.60093e+08	2.58891e+08	2.68247e+08	2.57219e+08	4.16485e+08	3.11296e+08	3.91167e+08	3.84197e+08	4.3525e+08	4.24793e+08	7.66063e+08	2.39361e+08	7.53307e+08	5.7275e+08	3.65406e+08	3.3643e+08	7.89215e+08	3.1076e+08	5.00935e+08	5.2515e+08	4.81838e+08	3.77055e+08	3.02465e+08	3.66796e+08
8-{3-Oxo-2-[(2E)-2-penten-1-yl]-1-cyclopenten-1-yl}octanoic acid	2.41953e+09	1.22111e+09	1.53883e+09	9.02059e+08	1.61612e+09	1.67068e+09	2.13416e+09	1.23772e+09	1.79355e+09	1.91291e+09	1.33976e+09	1.82567e+09	2.0341e+09	1.90352e+09	1.35849e+09	1.13067e+09	1.12185e+09	1.98004e+09	1.74644e+09	1.57296e+09	1.53612e+09	1.60467e+09	1.50584e+09	1.45039e+09	1.59366e+09	1.79625e+09	2.24234e+09	1.93144e+09
8Z,11Z,14Z-Eicosatrienoic acid	9.40962e+09	6.34358e+09	8.5632e+09	9.52379e+09	5.40829e+09	5.54109e+09	6.21964e+09	4.58296e+09	7.4835e+09	4.49833e+09	4.95896e+09	9.06933e+09	4.05869e+09	6.41671e+09	3.4359e+09	6.57549e+09	4.06071e+09	2.74852e+09	4.72488e+09	6.21056e+09	5.89289e+09	5.62769e+09	3.93204e+09	7.03029e+09	9.33771e+09	6.81891e+09	5.90524e+09	6.52185e+09
9(Z),11(E),13(E)-Octadecatrienoic Acid methyl ester	2.95162e+08	4.09221e+08	3.26623e+08	3.11831e+08	3.90965e+08	5.10087e+08	3.28216e+08	3.48627e+08	3.31587e+08	3.28586e+08	2.35768e+08	3.14591e+08	2.99508e+08	1.01794e+08	1.54074e+08	2.36251e+08	3.93309e+08	2.38854e+08	3.40288e+08	2.98026e+08	3.42389e+08	3.1747e+08	2.31018e+08	4.15248e+08	3.18663e+08	2.32836e+08	2.68671e+08	2.36113e+08
9-Oxo-10(E),12(E)-octadecadienoic acid	1.13244e+09	7.75423e+08	9.21139e+08	8.56118e+08	8.73298e+08	8.47967e+08	8.1664e+08	8.1558e+08	7.79016e+08	1.13446e+09	1.10879e+09	9.80134e+08	1.20243e+09	9.04821e+08	9.12346e+08	9.75115e+08	1.12475e+09	1.43781e+09	6.80535e+08	7.11865e+08	1.47345e+09	9.72936e+08	1.05627e+09	7.22832e+08	6.58502e+08	1.02253e+09	6.95328e+08	6.02118e+08
9-hydroxy-2,10,10-trimethyltricycloundec-6-ene-6-carboxylic acid	4.47076e+08	4.81056e+08	4.68046e+08	5.22333e+08	1.97783e+08	2.33248e+08	7.46858e+08	3.47254e+08	4.52107e+08	1.27561e+08	8.61047e+08	3.13585e+08	1.83518e+08	1.41392e+08	1.67157e+08	8.71023e+08	1.72146e+08	2.53346e+08	2.51778e+08	7.0403e+08	2.73135e+08	2.35892e+07	2.91905e+08	1.73479e+08	3.94774e+08	3.10517e+08	1.7867e+08	4.02861e+08
Linolenic Acid	1.24426e+08	2.13494e+08	1.19041e+08	1.38553e+08	1.08013e+08	1.42396e+08	2.62087e+08	2.41409e+08	1.00911e+08	1.65131e+08	1.50223e+08	9.37769e+07	8.45067e+07	1.34074e+08	1.70238e+08	1.46932e+08	1.31959e+09	1.25645e+08	3.6365e+08	3.01623e+08	7.24149e+08	1.35283e+09	1.51196e+09	1.29542e+09	3.20401e+08	1.73262e+08	1.75404e+08	1.42541e+08
17-6-keto Prostaglandin	4.51333e+08	4.87379e+08	8.29699e+08	4.476e+08	4.16958e+08	3.81153e+08	4.16801e+08	4.12514e+08	4.95651e+08	6.46887e+08	5.79681e+08	4.31667e+08	5.88672e+08	4.56939e+08	3.66038e+08	8.92496e+08	3.84532e+08	4.86613e+08	3.68004e+08	5.89793e+08	4.36918e+08	4.51109e+08	4.40233e+08	7.80096e+08	5.00881e+08	5.72553e+08	8.39996e+08	7.30627e+08
ALK	1.08605e+09	1.95193e+09	9.94318e+08	9.30122e+08	1.59598e+09	3.27505e+09	1.38398e+09	1.83479e+09	1.37845e+09	5.24311e+08	1.08178e+09	3.68935e+09	2.57643e+08	9.36174e+08	1.20405e+09	1.63121e+09	4.46283e+08	2.57066e+08	2.52012e+09	1.84711e+08	2.08285e+08	1.91527e+08	1.48705e+08	2.77183e+08	3.08037e+08	1.7114e+09	1.13654e+09	9.05926e+08
AUDA	4.66988e+08	4.61481e+08	6.90208e+08	7.57363e+08	5.96551e+08	6.93081e+08	8.71522e+08	6.68299e+08	8.29473e+08	4.26156e+08	4.90278e+08	5.26473e+08	9.56088e+08	4.23522e+08	4.53329e+08	5.47984e+08	4.09308e+08	3.7287e+08	5.41956e+08	7.37389e+08	3.4324e+08	9.52391e+08	6.16016e+08	9.99497e+08	1.00517e+09	4.82469e+08	4.8789e+08	7.81172e+08
Acetildenafil	2.87916e+08	7.77333e+08	8.95744e+08	8.00952e+08	5.08161e+08	1.21793e+09	1.83174e+09	2.18535e+09	9.71751e+08	1.3284e+09	5.07807e+08	7.25634e+08	1.15771e+09	9.41278e+07	9.6091e+08	2.14631e+08	4.73903e+08	1.10709e+09	6.60896e+08	7.88145e+08	1.36751e+09	3.14633e+08	6.48816e+08	4.5482e+08	5.74432e+08	3.52366e+08	5.16541e+08	4.0988e+08
Acetylcholine	9.74832e+08	6.03963e+09	8.29842e+09	6.39082e+09	5.54373e+08	5.70422e+09	1.20661e+09	5.92051e+08	6.70658e+08	2.37442e+09	7.59305e+09	8.7455e+09	3.85294e+09	1.47944e+10	9.67534e+09	8.82626e+09	6.04529e+09	3.82474e+09	4.70691e+09	5.41096e+08	3.28691e+09	2.49609e+09	4.7797e+09	4.2356e+09	5.6034e+09	6.15117e+09	8.21504e+09	5.79273e+09
Acetylvardenafil	2.21404e+08	2.65812e+08	2.38767e+08	1.85299e+08	3.76684e+08	2.46565e+08	2.61676e+08	2.72495e+08	1.67168e+08	3.05538e+08	3.62211e+08	2.38476e+08	4.36648e+08	2.39986e+08	1.72713e+08	3.07959e+08	2.20341e+08	2.22805e+08	2.88806e+08	1.62093e+08	3.03428e+08	2.58317e+08	1.73779e+08	1.88934e+08	1.24512e+08	2.43715e+08	2.00966e+08	1.99518e+08
Adenine	6.12513e+10	1.35082e+10	1.80256e+11	5.96122e+10	9.2375e+09	1.36803e+10	2.73639e+10	1.09062e+10	8.33689e+09	1.42128e+10	2.15487e+10	3.96276e+09	4.74601e+09	1.79884e+11	9.82475e+09	1.12107e+11	3.99653e+10	5.35961e+10	1.36587e+10	3.22101e+09	2.60643e+10	3.13804e+09	5.78926e+09	3.34267e+09	9.85457e+09	5.80645e+10	2.49817e+09	1.51308e+10
Adenosine	4.8452e+09	1.5598e+09	3.26738e+09	2.31757e+09	1.31277e+09	3.27032e+08	2.5909e+09	1.5455e+09	5.17415e+08	1.96454e+09	1.72729e+09	1.24628e+09	2.18534e+09	2.4206e+09	3.05928e+09	3.32548e+09	1.77414e+09	2.34908e+09	1.83121e+09	1.37517e+09	2.39103e+09	8.87954e+08	8.94422e+08	1.18473e+09	2.2173e+09	5.5735e+09	1.34041e+09	2.02944e+09
Adrenic acid	3.66071e+09	3.26573e+09	3.48962e+09	2.30145e+09	2.89248e+09	3.48674e+09	3.44258e+09	2.29138e+09	4.33547e+09	4.55749e+09	6.9514e+09	5.62726e+09	6.62489e+09	4.72405e+09	3.09802e+09	5.70792e+09	4.62867e+09	2.33358e+09	2.54007e+09	4.80132e+09	2.65231e+09	4.86892e+09	3.98143e+09	5.29919e+09	4.88724e+09	4.80965e+09	3.1967e+09	2.58058e+09
Alachlor ESA	2.24395e+09	2.63355e+09	2.69894e+09	2.52705e+09	2.15883e+09	2.54065e+09	1.8371e+09	2.30952e+09	2.51444e+09	3.05243e+09	2.35401e+09	2.77756e+09	3.50266e+09	2.4187e+09	2.50779e+09	2.9843e+09	2.10949e+09	2.91152e+09	2.28535e+09	3.06684e+09	2.52595e+09	3.10177e+09	2.84263e+09	2.92362e+09	2.64649e+09	2.39987e+09	2.6069e+09	3.77131e+09
Allopurinol	3.76041e+10	5.4974e+10	2.20612e+10	4.16597e+10	3.21479e+10	4.47477e+10	3.8036e+10	3.23362e+10	2.62529e+10	3.63517e+10	3.25479e+10	2.54022e+10	2.70333e+10	3.50172e+10	4.09662e+10	2.96996e+10	2.93245e+10	2.11003e+10	4.84703e+10	2.7174e+10	1.86061e+10	3.177e+10	2.7018e+10	2.76929e+10	2.51309e+10	4.69811e+10	2.37299e+10	3.62152e+10
Allyl 2-(1H-benzimidazol-2-yl)-2-cyano-N-phenylethanimidothioate	7.38842e+08	1.29387e+09	9.82598e+08	7.52503e+08	7.49937e+08	5.13657e+08	8.11668e+08	7.74483e+08	7.54072e+08	1.3612e+09	2.21917e+09	9.44883e+08	1.27014e+09	2.04208e+09	1.29026e+09	2.79752e+09	1.31428e+09	1.52766e+09	1.14038e+09	1.34548e+09	1.19952e+09	1.20525e+09	1.46523e+09	1.20839e+09	1.48808e+09	9.53678e+08	1.183e+09	1.67016e+09
Ambrosic acid	6.94005e+08	7.56717e+08	9.56526e+08	5.30876e+08	8.51602e+08	7.32799e+08	8.60479e+08	9.19753e+08	8.27015e+08	1.39233e+09	1.06247e+09	1.29933e+09	9.68542e+08	2.68574e+09	1.73468e+09	7.48352e+08	1.4378e+09	1.05222e+09	1.58415e+09	1.08965e+09	1.04831e+09	9.37121e+08	5.77953e+08	9.18296e+08	1.31971e+09	8.98161e+08	1.1111e+09	3.01214e+09
Anandamide (AEA)	9.24501e+08	8.37562e+08	9.70254e+08	4.69182e+08	1.27395e+09	1.31626e+09	3.00238e+08	1.46307e+09	1.52634e+09	4.84751e+08	3.69947e+08	4.49799e+08	6.79114e+08	3.2342e+08	2.87634e+08	5.18084e+08	5.09708e+08	6.19558e+08	4.15936e+08	1.95792e+09	4.88611e+08	7.51749e+08	9.9044e+08	4.11313e+08	3.65616e+08	1.29707e+09	1.10109e+09	3.73162e+08
Aniline	2.10933e+08	2.24123e+08	2.10373e+08	1.77208e+08	1.64686e+08	2.12213e+08	1.71137e+08	2.13007e+08	2.06497e+08	2.01171e+08	1.68251e+08	1.51887e+08	1.62176e+08	2.18545e+08	2.34693e+08	1.95578e+08	1.81855e+08	2.006e+08	2.55236e+08	2.27994e+08	1.93469e+08	2.00986e+08	1.5512e+08	1.65508e+08	1.67544e+08	2.09787e+08	1.91018e+08	2.56557e+08
Apigenin	2.56785e+08	3.1419e+08	3.10459e+08	5.20915e+08	5.35461e+08	5.23089e+08	3.22575e+08	3.13596e+08	1.97436e+09	1.78978e+08	1.1037e+09	2.50637e+08	2.2165e+08	3.86006e+08	1.06881e+08	2.40609e+08	2.62463e+08	3.19171e+08	2.63518e+08	1.5257e+08	1.05278e+09	5.31067e+08	2.008e+08	1.64757e+08	2.45943e+08	3.74671e+08	6.70977e+08	2.60252e+08
Apocynin	7.96191e+07	1.2788e+08	1.37919e+08	1.03485e+08	1.22302e+08	2.09501e+08	1.30807e+08	1.85605e+08	8.76272e+07	1.33702e+08	1.43088e+08	1.297e+08	1.60329e+08	5.52902e+07	1.05579e+08	1.53372e+08	7.90234e+07	1.12431e+08	1.11896e+08	1.30699e+08	1.14215e+08	1.29101e+08	6.302e+07	1.65894e+08	1.01478e+08	9.56785e+07	1.38295e+08	1.59025e+08
Arachidic acid	3.97336e+07	3.26462e+07	4.03272e+07	2.64187e+07	3.15755e+07	2.65887e+07	3.28372e+07	2.89875e+07	2.92116e+07	3.00598e+07	4.19143e+07	2.99238e+07	5.11742e+07	4.30386e+07	3.79728e+07	4.12396e+07	3.49627e+07	3.1913e+07	4.31484e+07	4.67743e+07	2.98292e+07	5.17127e+07	3.50868e+07	2.82233e+07	3.28359e+07	3.01716e+07	4.06512e+07	2.52061e+07
Arachidonic acid	6.38647e+10	4.64181e+10	5.68616e+10	4.03746e+10	3.29118e+10	5.83833e+10	2.1846e+10	2.45426e+10	4.66604e+10	3.13818e+10	2.89835e+10	4.23466e+10	3.68094e+10	2.46138e+10	2.45649e+10	1.94379e+10	3.37939e+10	2.47999e+10	3.86417e+10	4.132e+10	2.63275e+10	4.29455e+10	2.98636e+10	5.54364e+10	6.29856e+10	5.87022e+10	2.9589e+10	2.53511e+10
Arachidonoyl serinol	1.57835e+08	2.34243e+08	1.83669e+08	2.47883e+08	3.33194e+08	3.12413e+08	2.01987e+08	2.44378e+08	3.0804e+08	2.80249e+08	3.01291e+08	2.82025e+08	3.50222e+08	1.50876e+08	2.39278e+08	2.44092e+08	2.3841e+08	4.38913e+08	1.8908e+08	2.3068e+08	3.50876e+08	2.36506e+08	2.60523e+08	1.88112e+08	1.33602e+08	1.74834e+08	1.72029e+08	1.50401e+08
Arachidoyl glycine	2.69945e+08	2.60255e+08	3.03986e+08	1.66553e+08	1.76756e+08	1.26157e+08	1.7235e+08	1.55986e+08	2.02063e+08	3.37127e+08	5.73334e+08	5.87611e+08	1.51928e+08	3.95576e+08	6.4035e+08	3.32364e+08	2.56614e+08	2.23056e+08	3.19329e+08	1.62676e+08	1.19211e+08	2.28401e+08	2.96232e+08	1.6851e+08	1.86102e+08	2.65864e+08	3.42349e+08	7.65857e+08
Asiatic acid	5.54263e+08	1.1236e+09	3.93338e+07	3.53266e+08	6.39958e+07	2.73819e+08	3.52843e+08	3.80566e+08	4.0902e+08	1.7375e+08	4.83837e+07	5.89546e+07	8.25837e+08	1.01593e+08	1.33434e+08	2.20338e+08	3.52418e+08	7.50507e+08	2.62697e+08	1.80444e+08	1.00831e+08	2.48592e+08	1.72221e+08	8.36488e+07	1.30499e+08	6.2533e+08	1.29215e+08	1.70899e+08
Atomoxetine	5.35976e+08	5.24661e+08	5.82803e+08	6.186e+08	5.34902e+08	2.70726e+08	3.06171e+08	4.84687e+08	5.60808e+08	6.39755e+08	5.07229e+08	4.94068e+08	4.3367e+08	3.9729e+08	4.11016e+08	5.94478e+08	2.75015e+08	2.81969e+08	4.37337e+08	6.06841e+08	1.95517e+08	3.73912e+08	5.4253e+08	6.00618e+08	4.80625e+08	4.34206e+08	4.81543e+08	7.53882e+08
Azelaic acid	2.14562e+10	2.08836e+10	2.00891e+10	2.18679e+10	2.29597e+10	2.44683e+10	2.30061e+10	2.43762e+10	2.53071e+10	2.99515e+10	3.67212e+10	2.89755e+10	3.43375e+10	3.27181e+10	4.39699e+10	2.76684e+10	3.18833e+10	4.10269e+10	3.00846e+10	2.28124e+10	3.30944e+10	3.01366e+10	2.38689e+10	3.20279e+10	2.89543e+10	2.84998e+10	3.53507e+10	4.41765e+10
BB-22 3-Carboxyindole metabolite	8.51789e+07	4.35118e+07	1.00393e+08	7.45131e+07	8.03293e+07	5.31962e+07	4.63752e+07	5.80542e+07	7.24806e+07	9.0804e+07	8.68763e+07	1.15152e+08	1.16673e+08	3.55055e+07	5.20003e+07	9.62369e+07	3.96047e+07	5.77151e+07	7.7005e+07	7.34031e+07	9.75732e+07	8.90178e+07	4.87083e+07	8.87114e+07	3.58762e+07	6.69393e+07	6.91204e+07	6.00516e+07
Benzothiazole	9.50474e+08	9.17113e+08	8.5521e+08	6.59519e+08	8.12714e+08	9.67902e+08	7.87212e+08	8.74458e+08	8.9949e+08	1.0119e+09	9.3278e+08	8.05077e+08	8.56219e+08	1.44764e+09	1.08359e+09	1.00254e+09	9.36163e+08	9.16108e+08	1.02455e+09	9.45825e+08	9.81743e+08	8.70789e+08	7.16483e+08	9.20306e+08	7.6486e+08	9.13062e+08	9.38674e+08	9.30916e+08
Bilirubin	2.60943e+08	2.22035e+08	1.89359e+09	6.5205e+07	3.10008e+08	2.25478e+08	3.7136e+07	2.34168e+08	4.97178e+08	7.00843e+07	1.84427e+08	1.4411e+07	2.23595e+08	3.80097e+07	9.54683e+07	9.21598e+07	2.26123e+07	1.21781e+08	3.76546e+07	4.49322e+08	4.70903e+07	1.80441e+08	1.59569e+08	1.52696e+08	1.83592e+08	7.27441e+07	9.63137e+07	2.04928e+08
Bis(2-ethylhexyl) amine	2.91196e+08	2.65363e+08	3.07897e+08	2.5836e+08	3.03851e+08	2.93668e+08	3.31836e+08	2.88003e+08	3.26152e+08	2.92583e+08	2.63917e+08	2.53479e+08	2.59033e+08	3.12471e+08	3.11362e+08	2.85744e+08	2.67352e+08	2.68419e+08	3.06136e+08	3.0718e+08	2.65794e+08	2.72456e+08	2.15898e+08	2.63328e+08	2.54524e+08	2.75541e+08	2.67289e+08	1.76531e+08
Bis(3,5,5-trimethylhexyl) phthalate	1.09524e+08	8.66175e+07	1.70302e+08	1.20349e+08	1.0992e+09	1.33745e+08	8.43468e+07	7.78952e+07	1.02966e+08	1.03551e+08	1.67511e+08	1.23908e+08	1.29629e+08	1.91887e+08	2.74375e+08	1.37042e+08	8.79374e+07	9.08879e+07	9.4332e+07	1.20166e+08	1.48259e+08	2.09305e+08	2.16981e+08	2.39272e+08	1.61499e+08	1.27851e+08	2.15745e+08	3.44218e+08
Bis(4-ethylbenzylidene)sorbitol	6.84822e+10	1.30539e+11	8.18403e+10	1.16754e+11	1.16508e+11	1.43912e+11	1.15125e+11	7.87784e+10	8.03688e+10	6.341e+10	8.90661e+10	1.34831e+11	1.08779e+11	1.20115e+11	1.52262e+11	7.79716e+10	1.24483e+11	1.34267e+11	1.3475e+11	1.19769e+11	1.35922e+11	7.38273e+10	7.14728e+10	6.25594e+10	1.17713e+11	1.1708e+11	9.19974e+10	6.68192e+10
Butein	4.77797e+08	2.80387e+09	6.83101e+07	5.92535e+07	2.44668e+09	2.75667e+09	3.64362e+09	1.45287e+08	1.00138e+08	1.68038e+08	2.60489e+09	6.22188e+07	2.56027e+07	1.57709e+08	2.10545e+08	1.53052e+08	1.79049e+08	1.07717e+09	4.67911e+07	2.29838e+08	1.13708e+09	2.34644e+09	1.08645e+09	1.49999e+07	5.36662e+07	1.05695e+09	1.91693e+09	7.01815e+07
Butylisopropylamine	3.89106e+10	3.95757e+10	2.95474e+10	2.89766e+10	3.94017e+10	3.528e+10	3.31171e+10	7.52913e+10	3.55358e+10	7.35182e+10	3.65027e+10	2.73852e+10	2.64762e+10	4.12521e+10	4.69763e+10	3.98113e+10	9.79832e+10	6.87957e+10	4.05306e+10	3.07626e+10	7.14932e+10	3.53565e+10	3.28613e+10	2.89953e+10	2.85037e+10	2.93766e+10	3.84108e+10	4.19279e+10
CAPSO	1.6581e+07	1.67858e+07	1.93664e+07	2.12356e+07	1.56907e+07	2.33909e+07	2.52539e+07	3.73195e+07	1.70999e+07	1.29472e+07	1.87576e+07	1.98251e+07	1.76963e+07	2.24632e+07	2.82222e+07	1.19099e+07	1.63836e+07	2.52286e+07	1.95306e+07	2.46807e+07	1.90223e+07	1.98206e+07	1.79038e+07	2.58114e+07	2.52235e+07	1.41311e+07	1.65233e+07	2.08838e+07
CMPF	3.69033e+09	4.44357e+08	3.16319e+09	4.6545e+09	1.66435e+09	1.79407e+08	2.48943e+09	1.23486e+09	3.74627e+09	3.52387e+09	3.54074e+09	1.48868e+09	4.25728e+09	3.2107e+09	1.33477e+09	3.45928e+09	2.65035e+08	3.03763e+09	1.50693e+08	1.11933e+09	5.12218e+07	1.52919e+09	3.07139e+09	2.64775e+09	3.61976e+08	3.73505e+07	4.47093e+07	4.81531e+09
CP 47,497-C6-Homolog	1.19744e+08	4.24373e+07	1.96245e+08	1.17902e+07	4.70298e+07	7.2091e+07	2.47076e+07	2.56597e+07	6.65047e+07	3.67144e+07	1.1642e+08	9.17925e+07	4.52416e+07	2.28593e+07	7.70637e+06	4.18812e+07	5.81343e+06	3.36285e+07	2.96421e+07	2.61395e+07	3.94189e+07	6.99302e+06	4.23807e+07	6.74123e+07	8.50646e+07	1.0108e+08	6.33779e+06	1.15197e+07
CP 47,497-C8-Homolog C-8-hydroxy metabolite	2.66882e+08	2.55914e+08	2.61426e+08	2.6235e+08	3.28453e+08	2.82864e+08	2.46853e+08	3.86683e+08	2.45047e+08	3.38446e+08	4.41091e+08	4.23873e+08	4.42625e+08	3.15627e+08	3.26583e+08	3.33769e+08	5.50741e+08	6.42948e+08	3.83311e+08	2.91462e+08	5.46199e+08	6.18708e+08	3.72315e+08	4.58992e+08	3.27803e+08	3.57748e+08	3.67645e+08	3.34871e+08
Cafestol	2.46802e+10	1.99218e+10	1.76242e+10	1.57582e+10	1.97958e+10	1.97245e+10	1.73023e+10	1.70719e+10	1.64532e+10	2.14524e+10	2.48363e+10	2.24586e+10	2.95846e+10	2.14e+10	2.00641e+10	2.29104e+10	2.71031e+10	2.70176e+10	1.55571e+10	2.13564e+10	2.90278e+10	2.20136e+10	1.00919e+10	1.96222e+10	1.07226e+10	1.76887e+10	9.58501e+09	8.5856e+09
Caffeic acid	4.26357e+09	1.40753e+10	5.70091e+09	1.55155e+09	2.21641e+10	7.44722e+09	1.0522e+10	1.35241e+10	5.12946e+09	3.01679e+09	5.59378e+09	3.87574e+09	2.12143e+09	4.26765e+09	5.24181e+09	4.70844e+09	3.40884e+09	2.23923e+09	4.24369e+09	3.24472e+09	4.22657e+09	1.69014e+09	1.9902e+09	4.59306e+09	3.35417e+09	3.81287e+09	1.39534e+10	3.85048e+10
Cannabigerol	4.98602e+08	6.82813e+08	5.17785e+08	5.81694e+08	5.81204e+08	6.43864e+08	5.61861e+08	4.99359e+08	5.38335e+08	5.46369e+08	5.8898e+08	4.23304e+08	5.88566e+08	4.90324e+08	4.85403e+08	6.0042e+08	4.55177e+08	6.3368e+08	6.30875e+08	6.95208e+08	6.24164e+08	6.26145e+08	5.60566e+08	4.08255e+08	3.36061e+08	6.26633e+08	4.75292e+08	2.9948e+08
Cantharidin	4.41826e+07	2.16639e+07	5.6962e+07	8.51868e+06	1.1609e+08	7.15906e+07	6.10353e+07	4.76863e+07	6.73238e+07	3.28743e+07	3.40074e+07	8.03869e+07	6.01557e+07	1.05636e+07	1.34484e+08	2.70555e+07	6.25167e+07	1.01271e+08	5.57169e+07	1.0708e+08	2.60538e+07	1.3479e+07	2.22396e+08	2.96076e+08	2.86197e+07	1.4395e+08	7.87143e+07	6.54621e+07
Carvedilol	5.49056e+07	3.00542e+09	1.91038e+07	6.88234e+07	1.79399e+07	2.02904e+07	2.52037e+07	1.85947e+07	1.86029e+07	1.7984e+07	1.34335e+10	3.47492e+07	4.3859e+08	4.44643e+08	1.76206e+11	8.4716e+07	1.1889e+09	1.29921e+11	1.3735e+11	2.31904e+08	1.3036e+11	1.80641e+11	1.4533e+07	6.07912e+07	6.71995e+08	2.04832e+07	2.01818e+07	1.74666e+07
Catechol	1.78366e+09	1.48944e+09	1.41114e+09	7.47798e+08	7.90458e+08	7.82143e+08	1.33414e+09	4.01566e+08	1.24691e+09	1.52733e+09	1.67726e+09	1.97758e+09	1.19437e+09	7.13588e+08	1.3987e+09	1.61754e+09	4.07777e+08	1.96048e+09	1.42133e+09	1.11463e+09	1.11691e+09	1.52657e+09	8.40118e+08	1.96017e+09	1.35604e+09	7.0598e+08	1.98606e+09	3.95313e+09
Chlorogenic acid	8.4103e+07	5.81943e+07	1.60135e+09	4.46164e+07	7.9293e+07	1.19674e+08	5.61779e+07	6.76574e+07	2.13848e+09	5.18706e+07	4.68397e+07	4.40519e+07	4.51564e+07	4.42343e+07	4.62682e+07	4.55429e+07	4.17207e+07	5.48587e+07	9.03043e+07	5.57152e+07	5.9129e+07	5.81795e+07	5.01225e+07	9.36047e+07	4.52371e+07	5.02505e+07	1.29256e+08	6.14514e+07
Chlorproethazine	4.53664e+08	9.88956e+08	1.21398e+07	5.39227e+08	1.30244e+09	1.48506e+09	7.75602e+08	7.50935e+08	1.42222e+07	1.94898e+07	8.20638e+08	8.82299e+08	1.79719e+07	4.26859e+07	1.01514e+09	9.07264e+08	1.11736e+07	6.23887e+08	3.14518e+09	7.11836e+08	7.45743e+08	6.38821e+08	2.005e+08	4.95347e+08	7.80207e+08	5.07293e+08	2.70701e+09	6.54323e+09
Cholest-4-en-3-one	3.12791e+09	3.07691e+09	4.45869e+09	3.35363e+09	4.10755e+09	3.10348e+09	4.33359e+09	2.96432e+09	5.75238e+09	2.89283e+09	4.96669e+09	3.55022e+09	4.63844e+09	2.44309e+09	3.88801e+09	4.55926e+09	3.96944e+09	2.98926e+09	3.15393e+09	5.59597e+09	3.23255e+09	5.09859e+09	4.88037e+09	4.75328e+09	5.7736e+09	3.36259e+09	2.72373e+09	2.9871e+09
Cholic acid	2.80174e+09	3.34502e+09	1.64226e+09	4.07156e+09	3.12745e+09	3.52252e+09	3.30824e+09	1.28048e+09	2.95401e+09	7.60102e+09	3.51549e+09	1.01887e+10	9.24197e+09	7.07624e+09	8.07213e+09	1.31772e+10	9.28495e+09	2.59053e+09	1.04816e+10	1.18135e+10	5.07018e+09	1.10154e+10	4.90703e+09	9.48257e+09	2.90286e+09	5.79e+09	3.77631e+09	2.30974e+09
Choline	4.34223e+10	3.96108e+10	4.1374e+10	5.94385e+10	2.90754e+10	6.53396e+10	2.48568e+10	3.61478e+10	3.41074e+10	2.27952e+10	1.99358e+10	4.02575e+10	1.18755e+10	1.97262e+10	1.31702e+10	2.574e+10	1.65218e+10	1.55954e+10	1.96971e+10	1.52662e+10	1.25968e+10	1.21837e+10	3.08087e+10	2.34248e+10	6.53439e+10	2.72284e+10	6.36107e+09	9.69159e+09
Cilastatin	1.88477e+08	2.72098e+08	2.02604e+08	2.3769e+08	1.40639e+08	1.19308e+08	1.78679e+08	1.39311e+08	6.16277e+08	2.037e+08	2.32486e+08	1.67188e+08	3.78246e+08	2.64184e+08	1.78002e+08	3.21722e+08	2.1446e+08	2.32898e+08	2.16882e+08	2.25384e+08	1.21002e+08	2.01908e+08	1.82501e+08	1.85062e+08	4.55083e+08	1.66335e+08	2.23047e+08	2.92207e+08
Ciprostene	1.0971e+08	1.39345e+08	2.20602e+08	7.07752e+07	7.70902e+07	6.52174e+07	6.48062e+07	1.57339e+08	2.65906e+08	8.06487e+07	1.01039e+08	2.0925e+08	8.04281e+07	7.05173e+07	6.81053e+07	7.99478e+07	9.43287e+08	9.00926e+07	9.78166e+07	4.18101e+08	1.08081e+08	7.68597e+07	6.20047e+07	3.83358e+08	5.95497e+07	7.44921e+08	7.74375e+07	2.60946e+08
Citroflex A-4	4.80023e+08	3.14726e+08	3.32104e+08	2.80671e+08	2.54529e+08	4.67127e+08	4.97578e+08	3.19773e+08	3.82395e+08	3.01198e+08	4.09644e+10	8.96744e+08	3.61266e+08	2.84568e+08	3.72947e+08	2.98201e+08	2.97943e+08	3.10323e+08	3.29511e+08	3.21129e+08	3.15685e+08	4.67085e+08	3.22187e+08	3.10819e+08	3.06088e+08	3.07718e+08	3.4407e+08	3.26509e+08
Corchorifatty acid F	3.27836e+09	3.47765e+09	5.65714e+09	2.82366e+09	2.37196e+09	2.41619e+09	2.93934e+09	3.02122e+09	2.50902e+09	4.37466e+09	2.83537e+09	1.05516e+10	3.75191e+09	3.02992e+09	4.44886e+09	3.68308e+09	3.39248e+09	4.75164e+09	5.74062e+09	2.20718e+09	3.94108e+09	4.00139e+09	2.61729e+09	2.98053e+09	3.06246e+09	3.1747e+09	8.41236e+09	1.2313e+10
Corticosterone	1.27571e+08	1.03687e+08	1.20432e+08	1.86347e+08	1.64731e+08	1.2288e+08	7.87795e+07	1.34129e+08	1.75e+08	1.41302e+08	1.92185e+08	1.30334e+08	1.07835e+08	2.09204e+08	9.30236e+07	9.74536e+07	1.14238e+08	1.57778e+08	6.6917e+07	1.32995e+08	1.43613e+08	2.8683e+07	1.02832e+08	1.17658e+08	7.23456e+07	1.68161e+08	1.24049e+08	1.50057e+08
Creatine	1.24661e+08	7.18288e+07	3.00514e+08	3.51014e+07	2.99222e+08	3.40357e+08	1.18087e+08	2.85273e+08	2.54917e+08	3.50756e+08	1.3259e+07	9.21194e+07	1.5386e+07	1.66458e+07	1.67969e+07	1.55277e+07	1.32385e+07	1.37926e+07	1.39983e+07	1.13507e+07	1.28629e+07	1.31736e+07	1.07875e+07	1.10623e+07	4.94839e+07	1.45787e+07	2.59259e+08	6.71312e+08
Creatinine	1.05601e+10	1.68972e+10	1.89366e+11	1.01545e+10	1.61722e+11	2.06881e+11	3.95967e+10	2.90051e+11	2.40568e+11	2.47646e+11	1.57905e+10	1.55418e+11	6.73948e+09	4.99435e+09	7.21625e+09	1.20733e+11	8.60465e+09	7.10996e+09	6.1834e+09	5.29372e+09	4.50689e+09	1.43708e+10	8.03472e+09	9.34453e+09	9.97367e+09	1.07662e+10	1.86092e+11	1.52218e+11
Crotonic acid	1.0179e+10	9.43447e+09	1.02618e+10	9.57747e+09	8.95585e+09	8.98199e+09	8.80293e+09	9.33383e+09	1.20693e+10	1.04123e+10	6.92173e+09	9.67236e+09	8.35574e+09	1.13206e+10	9.70359e+09	9.05369e+09	7.18829e+09	7.74337e+09	9.73997e+09	8.10775e+09	2.73437e+09	7.63707e+09	6.86611e+09	3.13368e+09	7.16593e+09	8.46897e+09	9.41915e+09	1.16489e+10
Cyclo(leucylprolyl)	7.00094e+08	5.73241e+08	8.56501e+08	6.52639e+08	8.19934e+08	6.32909e+08	6.3713e+08	6.11358e+08	8.72746e+08	6.92897e+08	1.06857e+09	1.12286e+09	5.87357e+08	9.34103e+08	4.22493e+08	5.44282e+08	4.83468e+08	8.57493e+08	6.24849e+08	5.55379e+08	7.72834e+08	7.75902e+08	6.44924e+08	9.14607e+08	3.60634e+08	5.38972e+08	5.34411e+08	7.46125e+08
Cyclohexanecarboxylic acid	4.33629e+08	1.82459e+08	3.56302e+08	1.64323e+08	1.95113e+08	1.16701e+08	3.85625e+08	1.09489e+08	1.53935e+08	1.54665e+08	7.63461e+08	3.50222e+08	2.99179e+08	4.29075e+08	1.52209e+08	1.48202e+08	4.24757e+08	4.61443e+08	2.36872e+08	3.09912e+08	2.06588e+08	2.51171e+08	3.8624e+08	2.36519e+08	1.58083e+08	9.25214e+08	2.655e+08	6.50559e+08
D-(+)-Camphor	7.94796e+08	8.12779e+08	7.76777e+08	7.84479e+08	6.67513e+08	8.65946e+08	6.21362e+08	7.60757e+08	7.31608e+08	7.80985e+08	6.66084e+08	6.70462e+08	6.43999e+08	7.47855e+08	8.16705e+08	7.37195e+08	7.59269e+08	8.03006e+08	8.86042e+08	8.8132e+08	7.37437e+08	8.75051e+08	6.3286e+08	7.396e+08	7.85053e+08	7.82807e+08	7.05383e+08	9.07216e+08
D-(+)-Proline	3.92205e+10	3.91011e+10	3.92224e+10	3.10368e+10	2.76628e+10	2.50063e+10	1.29361e+10	2.72196e+10	3.60569e+10	2.66923e+10	2.56669e+10	3.19735e+10	1.4431e+10	5.29438e+10	4.26396e+10	4.31043e+10	2.17134e+10	2.91831e+10	3.47785e+10	1.78915e+10	1.14048e+10	1.6994e+10	1.08955e+10	1.8086e+10	1.78607e+10	4.28091e+10	3.05345e+10	4.55651e+10
D-(+)-Tryptophan	5.54275e+10	4.47098e+10	5.55373e+10	4.80042e+10	3.71136e+10	3.13477e+10	3.25168e+10	3.31015e+10	4.58931e+10	3.39122e+10	2.6604e+10	3.64405e+10	8.99398e+09	4.61623e+10	5.24457e+10	4.42105e+10	2.22239e+10	1.9618e+10	4.47405e+10	1.16819e+10	1.40974e+10	1.63678e+10	1.9811e+10	1.1869e+10	1.3966e+10	5.62561e+10	4.12665e+10	5.15029e+10
D-(-)-Lyxose	1.11714e+10	4.01359e+09	1.1649e+10	9.02851e+09	8.66763e+09	6.91473e+09	1.02149e+10	8.29519e+09	9.85504e+09	9.63778e+09	7.83658e+09	9.02945e+09	1.16673e+10	1.76708e+10	1.21877e+10	1.45988e+10	1.075e+10	9.42934e+09	6.19006e+09	9.82649e+09	9.37999e+09	1.14336e+10	9.39358e+09	1.29592e+10	8.19049e+09	1.22105e+10	4.05101e+09	4.80297e+09
D-Carnitine	5.50258e+09	4.72284e+09	2.29946e+09	2.56468e+09	4.03948e+09	2.99796e+09	2.96082e+09	4.0203e+09	4.99765e+09	6.31932e+08	1.94537e+09	2.35694e+09	8.44654e+08	8.40152e+08	2.48544e+09	1.91359e+09	1.22873e+09	1.25862e+09	1.354e+09	1.79769e+09	3.69303e+08	1.20741e+09	1.02741e+09	2.38588e+09	8.03543e+08	1.1415e+09	1.31782e+09	1.24103e+09
DL-2-(acetylamino)-3-phenylpropanoic acid	1.02714e+09	5.79264e+08	7.26031e+08	1.38067e+08	7.88054e+08	8.64283e+08	4.10775e+08	9.98083e+08	2.0474e+09	8.09888e+08	3.12163e+08	1.9895e+08	8.74232e+08	1.73899e+09	2.23729e+08	2.57609e+08	1.27774e+08	4.66613e+08	1.15062e+09	9.70283e+08	1.15467e+08	5.01565e+08	1.36591e+09	5.79325e+08	1.62371e+08	7.77035e+08	1.06741e+09	8.69004e+08
DL-4-Hydroxyphenyllactic acid	1.97039e+10	3.36795e+10	5.78233e+09	1.07962e+10	2.7624e+10	5.98138e+10	2.36086e+10	4.73409e+10	2.38723e+10	2.28352e+10	1.42452e+10	2.08323e+10	2.53269e+10	1.42674e+10	1.9913e+10	2.99557e+10	1.31667e+10	2.5258e+10	1.20846e+10	1.21604e+10	3.99187e+10	4.01367e+09	1.00022e+10	6.85316e+09	5.05089e+09	2.9886e+10	1.48718e+10	1.11856e+10
DL-Arginine	4.10855e+09	3.34124e+10	2.82613e+11	1.33754e+11	1.97137e+11	1.9897e+11	4.24498e+09	3.88982e+09	2.23222e+10	1.72717e+11	5.14905e+09	1.34613e+10	4.74239e+09	9.49254e+09	8.38505e+10	2.19367e+10	6.22451e+10	4.63306e+09	3.92447e+09	2.74791e+09	4.71604e+09	4.65123e+09	6.39732e+09	3.67735e+09	4.6147e+09	2.18866e+10	1.21441e+11	2.83502e+11
DL-Lactic Acid	3.17914e+10	9.48375e+10	2.37992e+10	2.09165e+10	6.43042e+10	1.61582e+11	4.93306e+10	4.1166e+10	4.99505e+10	1.43051e+10	3.15987e+10	4.21989e+10	1.54712e+10	4.62482e+10	4.96372e+10	1.75041e+10	3.59133e+10	5.54368e+10	3.39116e+10	1.77615e+10	5.12545e+10	3.23922e+10	1.40927e+10	2.96381e+10	1.49018e+10	6.14295e+10	4.57637e+10	3.61064e+10
DL-Leucineamide	3.7934e+10	1.23397e+10	1.58447e+10	6.58739e+09	1.54578e+10	4.76398e+09	6.29542e+09	1.06909e+10	6.66571e+09	1.80067e+10	2.07006e+10	1.49041e+10	1.14812e+10	1.56696e+10	1.84247e+10	1.75167e+10	2.21032e+09	1.94396e+10	1.71594e+10	3.45605e+10	5.78221e+09	1.84389e+10	1.72456e+10	1.51306e+09	1.20008e+10	1.07186e+10	1.74574e+10	1.00819e+10
DL-Malic acid	5.1919e+08	1.03267e+09	2.04063e+08	3.05606e+08	8.93404e+08	5.04061e+08	2.17856e+08	2.40259e+08	3.96813e+08	4.78106e+08	1.03504e+09	7.64452e+08	2.01205e+08	4.28594e+08	9.04137e+08	2.82321e+08	7.49648e+08	9.48232e+08	2.36813e+08	4.06017e+08	3.95804e+08	3.74412e+08	6.61103e+08	3.56185e+08	2.54896e+08	7.6867e+08	1.53469e+08	9.251e+07
DL-Mandelic acid	7.19914e+09	2.8143e+10	4.41122e+09	1.39964e+10	4.27315e+09	7.47459e+09	4.4996e+09	2.75397e+10	9.00362e+09	1.69903e+09	1.28082e+10	3.77023e+10	2.97196e+09	3.19117e+09	1.0356e+10	5.08707e+09	2.95855e+10	3.24451e+10	2.48972e+10	1.85031e+10	3.06824e+10	2.66555e+10	3.52184e+09	2.93815e+09	3.10939e+10	1.06748e+10	4.26326e+10	2.82079e+10
DL-Tryptophan	5.45323e+11	3.95124e+11	5.0953e+11	4.47239e+11	3.22478e+11	2.48629e+11	2.6041e+11	2.76822e+11	4.34838e+11	3.17373e+11	2.4127e+11	2.78234e+11	7.78045e+10	4.4509e+11	4.66406e+11	4.73737e+11	1.63757e+11	1.15052e+11	3.44368e+11	6.89892e+10	9.21669e+10	7.93876e+10	1.54068e+11	8.03175e+10	2.65827e+10	5.05101e+11	3.55856e+11	4.59885e+11
DL-Methoxyphenylacetic acid	2.44279e+08	2.44039e+08	2.4283e+08	7.45253e+08	2.83324e+08	3.25822e+08	5.84535e+08	4.38573e+08	4.57695e+08	8.39414e+08	7.78176e+08	4.90284e+08	3.53669e+08	3.50203e+08	3.7908e+08	2.8936e+08	3.37734e+08	3.48384e+08	6.07219e+08	5.78962e+08	3.92733e+08	7.37734e+08	6.25487e+08	2.99277e+08	2.40021e+08	5.6357e+08	2.67221e+08	4.0741e+08
DL-Leucine	2.10576e+11	1.72833e+11	1.91021e+11	1.97346e+11	1.49863e+11	9.83407e+10	1.17843e+11	1.40647e+11	1.88965e+11	1.28101e+11	1.20094e+11	1.40262e+11	5.66289e+10	1.98442e+11	2.02681e+11	1.80214e+11	7.58148e+10	5.93113e+10	1.62085e+11	4.35469e+10	3.93833e+10	5.61711e+10	7.27674e+10	4.38459e+10	3.88287e+10	2.16127e+11	1.74282e+11	2.18604e+11
DLK	1.23559e+09	5.36569e+08	7.8983e+08	6.39151e+08	1.15773e+09	6.77168e+08	1.05321e+09	6.7128e+08	1.36884e+09	3.54519e+08	7.86316e+08	7.64927e+08	1.43475e+08	1.31713e+09	7.22647e+08	9.1831e+08	2.03286e+08	1.83302e+08	1.06505e+09	1.39872e+08	1.10905e+09	1.49994e+08	8.678e+07	1.03084e+08	1.32246e+08	6.83671e+08	3.27708e+08	5.99869e+08
Daidzein	4.92484e+09	2.30575e+09	2.8939e+09	3.41212e+09	1.97026e+10	1.58043e+10	9.86278e+09	1.28996e+10	3.29012e+10	1.52579e+10	3.65055e+10	1.41194e+10	1.29555e+09	3.60277e+09	1.94599e+09	6.68645e+09	3.98682e+09	5.1176e+09	1.25894e+09	1.76086e+10	2.41482e+10	1.19876e+10	2.66594e+09	2.47929e+09	1.24517e+09	2.11052e+09	1.33642e+10	1.12921e+09
Deoxycholic Acid	1.96783e+08	1.94805e+08	3.82989e+08	3.8725e+08	5.32244e+07	1.27034e+08	9.23431e+07	1.41836e+08	3.47688e+08	3.89571e+08	3.84791e+08	3.32066e+08	5.54537e+08	1.19445e+08	2.66854e+07	5.37593e+08	1.06568e+08	1.09847e+07	4.7717e+08	2.66716e+08	5.13222e+07	5.33102e+08	3.47443e+08	4.77929e+08	4.17252e+08	5.56247e+07	4.13881e+07	7.16097e+07
Deoxycholic acid	6.83353e+10	6.59612e+10	1.13124e+10	6.86828e+10	5.84879e+10	5.78185e+10	5.01074e+10	5.51495e+10	7.35989e+10	7.52529e+10	7.4253e+10	6.84128e+10	8.14038e+10	3.97552e+10	5.27343e+10	8.63039e+10	6.68714e+10	1.17525e+10	9.43574e+10	8.72534e+10	4.83496e+10	9.53206e+10	6.19531e+10	8.00284e+10	7.00125e+10	4.98827e+10	2.88737e+10	3.21707e+10
Dextrorphan	3.13846e+08	2.75665e+08	6.35797e+08	2.82404e+08	3.62887e+08	2.14193e+08	2.18834e+08	3.53695e+08	2.60298e+08	4.54459e+08	3.6237e+08	4.93574e+08	4.13467e+08	1.19566e+08	1.6852e+08	4.67096e+08	3.0936e+08	3.33697e+08	2.86858e+08	2.94079e+08	4.83605e+08	4.43729e+08	3.49378e+08	2.39554e+08	9.18037e+07	2.86884e+08	2.34373e+08	9.08665e+07
Di(2-ethylhexyl) phthalate	7.38462e+07	1.15458e+08	2.25699e+07	4.519e+07	6.56855e+07	1.29674e+08	5.25682e+07	9.63801e+07	4.24848e+07	3.27866e+07	7.81061e+07	4.07465e+07	1.40398e+07	7.01149e+06	4.86527e+07	8.55382e+07	1.28762e+08	6.15361e+07	1.50294e+08	3.06027e+07	2.62994e+08	6.99297e+07	1.14327e+08	1.00814e+08	2.17585e+07	5.34296e+07	5.55245e+07	5.77646e+07
Dibutylone	4.93355e+08	1.28185e+09	1.45683e+09	3.6949e+08	3.494e+08	2.75393e+08	8.81656e+08	4.1107e+08	6.72237e+08	1.68332e+09	6.45109e+08	2.56289e+08	8.66606e+08	8.46901e+08	3.47036e+08	8.02451e+08	2.86319e+08	7.85947e+08	1.69374e+09	1.59516e+08	2.92193e+08	3.10378e+08	7.24551e+08	2.57339e+08	2.98854e+08	4.63706e+08	4.5111e+08	1.07176e+09
Didecyldimethylammonium	5.75436e+09	6.24298e+09	8.70462e+09	1.02024e+10	7.80476e+09	9.30788e+09	7.20128e+09	8.05017e+09	6.57959e+09	6.86811e+09	6.43464e+09	7.71707e+09	9.25526e+09	3.55504e+09	7.36704e+09	7.52246e+09	6.69347e+09	5.70308e+09	7.69468e+09	7.91347e+09	5.9727e+09	7.42292e+09	3.95706e+09	6.80069e+09	4.9703e+09	5.20613e+09	5.86468e+09	5.49298e+09
Diethyl phosphate	2.23161e+08	2.56949e+08	3.97703e+08	3.73768e+08	2.09863e+08	2.06732e+08	2.21552e+08	2.3883e+08	3.33519e+08	5.20017e+08	2.40515e+08	2.05951e+08	5.74096e+08	1.41165e+08	1.72934e+08	2.96251e+08	3.9717e+08	2.39431e+08	3.25584e+08	5.99448e+08	3.04235e+08	6.14266e+08	3.1417e+08	4.5879e+08	2.87806e+08	4.45488e+08	3.07239e+08	2.22649e+08
Difenoxurone	2.39565e+08	2.28364e+08	2.02353e+08	2.1221e+08	1.4674e+08	2.17638e+08	1.04783e+08	1.38236e+08	2.2678e+08	4.04185e+08	3.20444e+08	2.12813e+08	1.08536e+08	2.91471e+08	6.84241e+08	2.86602e+08	1.82583e+08	8.05887e+07	1.53266e+08	1.47306e+08	1.87625e+08	9.80996e+07	2.15523e+08	9.84944e+07	1.07708e+08	2.59763e+08	1.96454e+08	2.1953e+08
Dimefuron	3.82082e+07	2.34827e+08	4.86366e+07	1.09143e+08	3.76019e+07	9.10301e+07	1.48879e+08	1.79675e+08	1.4688e+07	2.01656e+08	6.35348e+09	1.59861e+08	9.90145e+09	8.0067e+09	6.37334e+08	4.82053e+08	6.44534e+09	7.20302e+09	7.86477e+09	4.5605e+08	4.57234e+08	7.17044e+09	4.999e+09	3.18569e+08	8.73366e+09	5.59949e+08	1.63527e+08	1.65709e+08
Dimethylsildenafil	8.34458e+08	3.19097e+08	5.61744e+08	7.25122e+08	5.4549e+08	4.9865e+08	5.72669e+08	7.25496e+08	8.35643e+08	6.80143e+08	2.08076e+08	2.34056e+08	5.27644e+08	5.90649e+08	5.30859e+08	6.53916e+08	6.68135e+07	6.31965e+08	2.48106e+08	7.71968e+08	5.62931e+08	1.57667e+08	7.62738e+08	5.32134e+08	6.05857e+07	5.17102e+08	8.10413e+08	6.80758e+08
Dimetotiazine	2.24802e+07	1.18963e+07	2.54232e+07	1.278e+07	1.25927e+07	1.22994e+07	1.03562e+07	1.3318e+07	2.69055e+07	3.78231e+07	1.06287e+07	1.33799e+07	6.16216e+07	3.55832e+07	2.50961e+07	1.22657e+07	8.7269e+06	3.02926e+07	1.17846e+07	6.74383e+07	1.79537e+07	9.20826e+06	2.27381e+07	5.22891e+07	9.40949e+06	3.01693e+07	1.97592e+07	3.11995e+07
Dioctyldimethylammonium chloride	4.93519e+08	2.75115e+08	2.10016e+08	3.75053e+08	2.11711e+08	5.53454e+08	1.83082e+08	5.28168e+08	2.61417e+08	5.73668e+08	4.39587e+08	1.86928e+08	3.49024e+08	4.70119e+08	2.30219e+08	5.98143e+08	9.99927e+07	5.30214e+08	2.53515e+08	2.42617e+08	5.24863e+08	2.22175e+08	3.85778e+08	3.60165e+08	2.94865e+08	4.36346e+08	4.7833e+08	6.93675e+08
Diphenylamine	1.65798e+09	1.65568e+09	1.42619e+09	1.31303e+09	1.21141e+09	1.56281e+09	1.23937e+09	1.65428e+09	1.47675e+09	1.57009e+09	1.38967e+09	1.33974e+09	1.18408e+09	1.72128e+09	1.81871e+09	1.50804e+09	1.444e+09	1.50491e+09	1.79948e+09	1.56994e+09	1.55316e+09	1.57236e+09	1.25415e+09	1.42355e+09	1.38927e+09	1.47707e+09	1.58223e+09	1.81802e+09
Docosahexaenoic Acid	5.4587e+07	1.32368e+07	1.16906e+08	9.70664e+07	1.00655e+08	2.26892e+07	6.88529e+07	1.00942e+08	8.1359e+07	6.57892e+07	2.85071e+07	2.95174e+07	2.51339e+07	8.47939e+07	9.54815e+07	2.26091e+07	8.81684e+06	8.87986e+06	9.01208e+07	1.05696e+08	1.34643e+08	2.27909e+07	7.16526e+07	1.68263e+07	8.70709e+07	1.11274e+08	9.17209e+07	6.90892e+07
Docosahexaenoic acid	3.84075e+10	2.77427e+10	3.38951e+10	2.41688e+10	2.10223e+10	3.11862e+10	1.98414e+10	2.18199e+10	2.47888e+10	2.17481e+10	2.79266e+10	2.3889e+10	3.03063e+10	1.6617e+10	2.08876e+10	2.18016e+10	2.30521e+10	2.4428e+10	2.77073e+10	2.94574e+10	2.7075e+10	2.99134e+10	2.20423e+10	3.00655e+10	3.80668e+10	3.61654e+10	1.96693e+10	1.6325e+10
Docosahexaenoic acid ethyl ester	3.74315e+10	3.16294e+10	4.96411e+10	4.40548e+10	3.10162e+10	2.67671e+10	2.42687e+10	2.62123e+10	4.35334e+10	4.677e+10	4.68665e+10	4.48815e+10	6.00108e+10	1.69635e+10	2.32032e+10	5.59147e+10	3.49832e+10	3.07631e+09	5.78457e+10	5.45031e+10	2.18978e+10	6.37799e+10	4.15919e+10	5.62335e+10	4.50068e+10	2.15923e+10	1.225e+10	1.29594e+10
Docosahexaenoyl Ethanolamide	6.69363e+08	6.35692e+08	6.52203e+08	3.28832e+08	6.47035e+08	6.13844e+08	2.15222e+08	7.03302e+08	9.0239e+08	6.00258e+08	2.53385e+08	3.79285e+08	6.16796e+08	3.82886e+08	3.85781e+08	4.90281e+08	3.8752e+08	6.06134e+08	3.8517e+08	9.3115e+08	6.41107e+08	1.01306e+09	6.62564e+08	2.86686e+08	3.66437e+08	6.96997e+08	5.21618e+08	3.20094e+08
Docosatrienoic acid	3.45246e+08	1.39145e+08	2.01768e+08	6.88896e+08	3.74718e+08	2.06111e+08	2.2264e+08	5.24892e+08	2.86031e+08	5.13478e+08	2.86498e+08	2.80194e+08	1.38123e+08	1.98278e+08	1.88705e+08	3.9907e+08	4.3991e+08	3.46109e+08	3.38072e+08	1.50015e+08	3.87063e+08	4.82261e+08	5.74594e+08	3.1153e+08	4.39213e+08	2.63602e+08	2.08077e+08	3.44241e+08
Dodecamethylcyclohexasiloxane	3.78364e+08	4.7233e+08	3.35933e+08	2.96994e+08	3.23305e+08	3.57293e+08	1.395e+08	3.71969e+08	3.01419e+08	3.88424e+08	3.36984e+08	3.95435e+08	3.27796e+08	1.51154e+08	5.04779e+08	3.6887e+08	3.60411e+08	3.78159e+08	2.17755e+08	4.32382e+08	4.20801e+08	4.29105e+08	3.61893e+08	4.23968e+08	4.27678e+08	4.25572e+08	3.56043e+08	2.28974e+08
Dodecanedioic acid	1.91291e+10	2.22524e+09	1.34891e+09	1.14842e+09	8.91226e+08	1.07151e+09	1.16486e+09	1.54213e+09	1.05082e+09	1.82846e+09	3.21268e+10	1.64685e+09	1.9898e+10	1.85488e+09	2.97783e+10	2.93421e+10	2.13389e+10	2.3471e+09	3.13128e+10	1.1259e+09	1.96048e+09	6.19847e+09	9.76347e+09	1.53232e+09	1.11765e+10	1.61277e+09	2.09505e+09	3.1674e+10
Dodecyl sulfate	3.44439e+09	3.15322e+09	3.60308e+09	3.28119e+09	2.71719e+09	3.64136e+09	3.33812e+09	6.12259e+09	3.17964e+09	2.68998e+09	2.70798e+09	2.88791e+09	2.58376e+09	2.68827e+09	2.66351e+09	3.13067e+09	2.57624e+09	3.14928e+09	2.6021e+09	2.91193e+09	2.36765e+09	3.68143e+09	2.06075e+09	7.907e+09	4.16519e+09	2.53155e+09	2.9787e+09	2.05454e+09
Dodecyltrimethylammonium	1.12041e+08	9.66417e+07	1.76572e+08	1.45366e+08	1.31541e+08	1.86308e+08	1.63976e+08	2.65513e+08	1.09836e+08	1.19642e+08	1.4361e+08	1.34364e+08	1.04986e+08	1.0563e+08	1.29376e+08	1.3289e+08	1.26471e+08	1.04003e+08	1.34793e+08	1.21675e+08	1.42564e+08	2.27016e+08	1.20057e+08	1.19117e+08	1.69487e+08	1.27229e+08	9.085e+07	1.10805e+08
Drospirenone	5.32723e+08	3.05458e+08	1.97962e+08	3.32763e+08	1.84424e+08	8.63497e+08	1.90733e+08	1.77937e+08	1.48493e+08	2.79839e+08	5.03357e+08	1.45503e+08	4.09787e+08	1.73697e+08	2.19159e+08	3.25386e+08	2.46646e+08	1.95133e+08	2.70419e+08	1.75951e+08	2.09138e+08	2.06284e+08	1.737e+08	2.81729e+08	2.92366e+08	2.68001e+08	2.87707e+08	2.02963e+08
EKK	2.25531e+08	1.08382e+08	1.32343e+08	2.0002e+08	2.34738e+08	2.22589e+08	2.67435e+08	1.14695e+08	5.49606e+08	2.02177e+08	8.34637e+07	6.62834e+08	3.66231e+07	2.23653e+08	1.36762e+08	2.83156e+08	3.88873e+07	4.48529e+07	6.65127e+08	5.00046e+07	3.13832e+07	4.81115e+07	3.46009e+07	3.7134e+07	3.80045e+07	3.44715e+08	7.89753e+07	6.88163e+07
Ebastine	1.92955e+07	7.20053e+06	1.41505e+07	8.05309e+07	1.81257e+07	7.03681e+06	2.54873e+08	4.67065e+06	8.90043e+06	1.91604e+08	6.56778e+06	1.62989e+08	2.75006e+08	7.24061e+06	1.10885e+07	4.86695e+06	4.97626e+06	1.42128e+07	1.00271e+07	2.00587e+08	2.60783e+07	9.47615e+06	1.12037e+08	1.63489e+08	5.62266e+07	2.25321e+08	9.4764e+07	4.77191e+07
Enalaprilat	5.12092e+07	6.46878e+07	4.58822e+07	5.12589e+07	5.56993e+07	7.19358e+07	5.14701e+07	6.43263e+07	5.73694e+07	7.51816e+07	6.16792e+07	6.80141e+07	2.42327e+08	4.68224e+07	6.0724e+07	5.59612e+07	4.97779e+07	5.31216e+07	6.11299e+07	1.6191e+08	9.52177e+07	5.97925e+07	1.01322e+08	4.38888e+07	7.34151e+07	5.69138e+07	1.31311e+08	8.46126e+07
Equol	7.22965e+09	8.02221e+09	4.84874e+09	4.10789e+09	8.99639e+07	6.79924e+08	8.37979e+09	4.1406e+07	3.88752e+07	5.36613e+07	4.06605e+07	3.524e+07	1.51094e+10	5.60916e+09	4.61999e+09	3.56816e+09	1.09506e+10	1.46315e+10	1.12901e+10	4.1922e+07	8.78055e+09	1.65923e+10	9.59298e+09	5.56974e+09	2.12408e+09	1.29729e+10	8.18808e+07	7.02671e+09
Eriodictyol	1.85417e+08	1.41407e+09	1.86475e+07	4.44084e+07	1.30547e+09	1.52568e+09	1.0569e+09	3.50237e+07	3.54241e+07	8.36463e+07	2.96882e+09	4.01185e+07	7.65142e+08	1.08269e+09	3.47608e+09	1.42451e+08	1.86551e+09	2.12517e+09	9.01426e+07	2.4475e+08	1.27097e+09	1.20381e+09	1.58148e+09	2.54454e+08	2.54569e+09	1.59044e+09	1.56413e+09	5.25383e+07
Erucamide	2.87434e+09	5.27324e+09	7.67518e+09	9.6887e+09	2.39637e+09	5.52116e+09	3.56896e+09	4.25707e+09	6.60996e+09	4.9936e+09	2.77396e+09	2.98734e+09	6.11923e+09	3.78067e+09	4.65184e+09	5.90169e+09	3.02162e+09	2.66276e+09	4.52977e+09	3.24993e+09	3.76024e+09	1.17528e+10	3.34767e+09	3.29878e+09	1.15267e+10	5.37837e+09	3.90388e+09	6.62575e+09
Erucic acid	7.74674e+07	4.82312e+07	8.25699e+07	3.80089e+07	4.68766e+07	5.44662e+07	5.35909e+07	6.04809e+07	5.08233e+07	5.71909e+07	7.25007e+07	6.72252e+07	7.61037e+07	7.29038e+07	5.58925e+07	7.73186e+07	9.57201e+07	6.78076e+07	5.70389e+07	8.74267e+07	6.26879e+07	9.47981e+07	5.80575e+07	7.81821e+07	7.02801e+07	7.85695e+07	5.37092e+07	6.72204e+07
Etamiphylline	1.41019e+09	2.81842e+09	1.14604e+09	1.05679e+09	1.18959e+09	2.53502e+09	1.57385e+09	1.09198e+09	1.77649e+09	1.45119e+09	1.87149e+09	1.92007e+09	3.59604e+09	1.64336e+09	1.4206e+09	4.64727e+09	7.55997e+08	3.81964e+09	1.29277e+09	2.15891e+09	9.63105e+08	1.05472e+09	7.80417e+08	1.05883e+10	6.4674e+08	1.36392e+09	6.63955e+08	1.26126e+09
Ethoxyquin	6.15134e+09	7.60625e+09	7.22194e+09	7.19605e+09	6.85116e+09	6.8589e+09	6.643e+09	6.03239e+09	7.97201e+09	8.02277e+09	6.87886e+09	6.5729e+09	1.02089e+10	4.77533e+09	6.64728e+09	6.61573e+09	9.61111e+09	7.46735e+09	1.04923e+10	6.83637e+09	6.71885e+09	9.35e+09	8.97965e+09	9.0232e+09	1.9224e+10	6.16285e+09	7.50087e+09	1.0395e+10
Ethyl 1-{3-[(2-thienylcarbonyl)amino]benzyl}piperidine-4-carboxylate	5.82988e+08	2.75446e+08	2.91365e+08	7.3946e+07	2.63554e+09	1.35126e+09	1.82381e+09	1.4825e+09	2.12387e+09	4.16833e+08	7.88714e+07	1.42879e+09	1.04224e+08	7.6273e+07	6.07466e+08	2.16731e+07	2.28429e+08	2.68079e+08	5.39563e+08	2.04261e+09	6.24627e+08	2.79583e+08	2.26245e+09	3.65004e+09	3.06683e+07	2.9698e+09	1.75009e+09	5.26138e+08
Ethyl 3-methyl-5,6-dihydroimidazo[2,1-b][1,3]thiazole-2-carboxylate	1.96649e+08	2.8756e+08	2.38782e+08	3.09387e+08	2.5972e+08	2.85373e+08	2.95069e+08	1.6707e+08	4.38366e+08	4.54047e+08	4.9701e+08	8.05067e+08	1.28436e+08	4.16986e+08	5.89125e+08	7.10067e+08	7.92177e+07	2.66093e+08	5.04952e+08	3.96088e+07	1.8972e+08	1.75527e+08	4.25666e+08	3.74646e+07	1.65694e+08	4.90532e+08	6.44185e+08	6.41977e+08
Ethyl oleate	6.12389e+07	1.14552e+08	3.26956e+07	7.45503e+07	3.61296e+08	3.25451e+08	6.10617e+07	2.21729e+08	3.63976e+08	2.37621e+08	1.14513e+08	3.31972e+08	2.74584e+07	7.51465e+07	2.71373e+07	2.68302e+08	3.06399e+07	2.03544e+08	1.7398e+08	6.7676e+07	1.82892e+08	4.66278e+07	2.2671e+08	1.81565e+08	3.04536e+07	6.16516e+07	1.71257e+08	5.37452e+07
Ethyl palmitoleate	1.2355e+09	1.33082e+09	1.38367e+09	1.31166e+09	1.40256e+09	1.46392e+09	6.88321e+08	1.42624e+09	1.5296e+09	1.4976e+09	1.36507e+09	1.17467e+09	1.27248e+09	1.21701e+09	1.37906e+09	1.24125e+09	1.1202e+09	1.18511e+09	1.2637e+09	9.54094e+08	1.37689e+09	1.51237e+09	1.29674e+09	1.37378e+09	2.98302e+09	1.26471e+09	1.25411e+09	1.88236e+09
Ethyl-D-glucuronide	1.1223e+09	1.29507e+09	1.0594e+08	1.29864e+09	7.05892e+08	1.20213e+09	1.24422e+09	1.37994e+09	1.12252e+09	1.71954e+09	1.48616e+09	1.51529e+09	1.82104e+09	3.99175e+08	1.46585e+09	1.21828e+09	1.6273e+09	1.64709e+09	1.17899e+09	1.66926e+09	1.65112e+09	1.68656e+09	1.69322e+09	1.6291e+09	1.37821e+09	8.70958e+08	1.14375e+09	1.40721e+09
FLK	4.00064e+08	1.14951e+08	9.39106e+07	2.30287e+08	2.12588e+08	1.54716e+08	1.76564e+08	2.76899e+08	3.19402e+08	2.69237e+08	1.95693e+08	5.11715e+08	1.34422e+08	2.94547e+08	2.80858e+08	5.36021e+08	1.25047e+08	1.64708e+08	2.91702e+08	9.16597e+07	7.52544e+07	5.99474e+07	7.17451e+07	6.00061e+07	1.18685e+08	2.01997e+08	1.23527e+09	4.16407e+08
FNK	3.49252e+08	5.42279e+08	6.42088e+08	8.43714e+08	3.44692e+08	1.21332e+09	3.35095e+08	1.13271e+09	6.79656e+08	1.47828e+09	6.23713e+08	2.06673e+09	1.49755e+08	5.00912e+08	4.11443e+08	9.35145e+08	4.34005e+08	8.0956e+08	1.27031e+09	4.35246e+08	4.23028e+08	4.21501e+08	5.85277e+08	3.42753e+08	3.64596e+08	4.60028e+08	9.39996e+08	1.26991e+09
Ferulic acid	4.43951e+10	2.51406e+10	2.82907e+10	3.22523e+10	2.83386e+10	1.27313e+10	1.6216e+10	2.36358e+10	3.98999e+10	3.50578e+10	3.30284e+10	1.11664e+09	1.95762e+10	4.93531e+10	3.84877e+10	3.02664e+10	3.40429e+10	2.34436e+10	2.16704e+10	2.5916e+10	4.35939e+10	3.24205e+10	4.11653e+10	1.77029e+10	7.35247e+08	2.61173e+10	7.45126e+08	1.44013e+10
Fexofenadine	5.54725e+08	2.93831e+09	7.93276e+08	1.83249e+07	2.06231e+08	5.59673e+07	9.40541e+08	8.90907e+08	7.53482e+08	6.27092e+08	4.32452e+07	1.14791e+09	2.67233e+08	8.68384e+08	1.16804e+09	4.14394e+08	8.35411e+08	5.58343e+08	4.80182e+08	1.40031e+09	1.85675e+09	5.72297e+08	5.11099e+08	7.66981e+08	9.282e+08	3.8429e+08	4.19972e+08	2.54512e+08
Fluoxetine	1.94298e+08	1.01511e+08	7.13908e+08	2.21526e+08	2.15841e+08	1.47715e+08	1.0111e+08	2.36133e+08	1.17955e+09	1.27079e+09	1.10465e+08	1.18664e+08	4.37607e+08	1.88861e+08	2.67744e+08	1.54005e+08	1.99253e+08	2.68307e+08	1.2454e+08	8.51568e+07	9.43839e+07	1.00172e+08	1.45825e+08	9.97707e+07	7.30897e+07	8.07615e+07	1.02173e+08	3.01322e+08
Flupirtine	5.99339e+07	6.71067e+07	6.26534e+07	4.63625e+07	7.42849e+07	5.7615e+07	8.50615e+07	5.77959e+07	3.65788e+07	1.24423e+08	1.04765e+08	1.28259e+08	1.21858e+08	7.20758e+07	9.16132e+07	6.2035e+07	8.17656e+07	7.11231e+07	7.6603e+07	5.60582e+07	8.45732e+07	3.87954e+07	5.32745e+07	6.70385e+07	4.99452e+07	6.16225e+07	5.74239e+07	1.01575e+08
GLK	9.47281e+09	8.53892e+09	7.22999e+09	7.61529e+09	7.97505e+09	6.13616e+09	6.44775e+09	6.99431e+09	1.20831e+10	6.09304e+09	5.53774e+09	1.14257e+10	1.37575e+09	8.81829e+09	9.45036e+09	1.25158e+10	1.85621e+09	9.69798e+08	1.07126e+10	4.10847e+08	8.96007e+08	1.03054e+09	9.70155e+08	8.60968e+08	8.76755e+08	1.01191e+10	5.03756e+09	7.18236e+09
Gabapentin	9.88415e+08	1.81772e+09	9.64392e+08	2.04265e+09	7.30283e+08	1.03541e+09	1.17831e+09	1.1868e+09	7.53735e+08	2.2728e+09	2.063e+09	4.65449e+09	1.68224e+09	2.21088e+09	1.74436e+09	2.12892e+09	2.11981e+09	1.47966e+09	2.95039e+09	1.73008e+09	7.21132e+08	8.18986e+08	1.12499e+09	1.93347e+09	7.82808e+08	1.2888e+09	7.96244e+08	1.36762e+09
Genistein	5.77539e+09	3.02976e+09	1.33228e+10	2.83838e+09	2.32953e+10	1.69592e+10	1.40075e+10	3.27314e+09	4.36407e+10	3.09111e+09	6.17063e+10	1.35609e+10	3.11906e+09	1.39125e+10	1.07076e+09	2.96212e+09	1.52314e+10	1.17345e+10	1.05211e+09	3.88808e+09	4.04217e+10	2.56381e+10	8.80568e+09	4.69807e+09	5.2564e+09	1.20629e+10	1.35442e+10	2.08717e+09
Geranylgeranyl pyrophosphate	5.17721e+08	5.80099e+08	4.64865e+08	7.77535e+08	6.50048e+08	3.77321e+08	9.34561e+07	2.39118e+08	4.09554e+08	1.78387e+08	7.18964e+08	5.78414e+08	1.16223e+09	4.95076e+08	5.47873e+08	7.02238e+08	2.4875e+08	3.33895e+08	5.72439e+08	4.85514e+08	4.33496e+08	4.89781e+08	6.01384e+08	5.80553e+08	5.84786e+08	4.83114e+08	6.10122e+08	5.38746e+08
Glycerophospho-N-palmitoyl ethanolamine	4.24147e+08	5.84406e+08	3.39623e+08	4.49232e+08	3.50884e+08	5.12697e+08	4.01449e+08	2.95921e+08	2.41422e+08	4.13747e+08	2.62901e+08	3.60655e+08	3.3173e+08	2.30459e+08	2.37205e+08	3.40572e+08	3.24131e+08	7.18992e+08	2.64775e+08	3.05345e+08	2.11933e+08	2.51985e+08	4.69764e+08	2.18928e+08	1.23425e+08	4.43864e+08	2.326e+08	1.84152e+08
Glycine	1.73723e+09	1.29817e+09	1.3868e+09	1.55398e+09	9.03577e+08	1.28648e+09	1.34452e+09	1.41812e+09	1.6387e+09	9.83922e+08	8.80121e+08	1.52147e+09	4.53795e+08	1.9264e+09	2.09299e+09	2.06511e+09	6.73932e+08	3.69447e+08	1.11769e+09	8.26539e+08	4.72379e+08	9.40274e+08	5.7741e+08	7.29188e+08	4.02804e+08	2.31162e+09	1.99519e+09	1.84508e+09
Glycocholic acid	3.46242e+09	1.54702e+09	2.82062e+09	2.70157e+09	1.73071e+09	6.14148e+08	9.36684e+08	1.21607e+09	3.14174e+09	2.84067e+09	2.13075e+09	2.44355e+09	1.03593e+09	8.55383e+08	1.56386e+09	4.1967e+09	1.72959e+09	3.6334e+07	3.44942e+09	1.22394e+09	3.51185e+08	2.76459e+09	1.10005e+09	2.41201e+09	1.15174e+09	9.4117e+08	3.65599e+08	1.26147e+09
Glycyl-L-leucine	3.31186e+10	4.00067e+10	3.70067e+10	4.61019e+10	2.40533e+10	3.21928e+10	3.50858e+10	3.40477e+10	3.87791e+10	3.74195e+10	2.43779e+10	4.34763e+10	1.04982e+10	5.36193e+10	3.52776e+10	5.59013e+10	1.68022e+10	1.24672e+10	3.80422e+10	6.88748e+09	6.2635e+09	8.728e+09	1.02804e+10	8.06142e+09	6.24403e+09	2.8554e+10	4.04585e+10	3.86536e+10
Guanidinosuccinic acid	9.7311e+09	9.44853e+09	6.73803e+09	4.25392e+09	7.69703e+09	4.95844e+09	7.78817e+09	7.43206e+09	6.22434e+09	1.26477e+10	1.18873e+10	4.87884e+09	7.73297e+09	8.26939e+09	1.08936e+10	1.14249e+10	1.07502e+10	1.03302e+10	1.47586e+10	6.30757e+09	6.67519e+09	1.44503e+10	1.1287e+10	5.46394e+09	9.07227e+09	1.45545e+10	1.00813e+10	1.73459e+10
Guanine	1.32332e+10	4.34231e+09	1.87907e+10	5.5612e+09	2.32693e+09	2.78905e+09	3.28258e+09	2.59833e+09	2.45064e+09	2.19833e+09	3.47727e+09	1.84772e+09	5.41358e+09	5.34718e+09	1.08469e+10	5.12917e+09	8.15674e+09	4.05098e+09	4.6816e+09	5.62828e+09	3.57708e+09	4.33693e+09	2.79564e+09	2.20229e+09	3.14388e+09	4.45842e+09	3.41052e+09	5.34515e+09
Guanosine	1.8655e+08	6.58769e+07	8.20397e+07	8.36773e+07	4.56047e+07	2.66855e+07	6.9015e+07	3.77378e+07	3.17956e+07	6.19401e+07	5.60815e+07	4.6283e+07	9.5993e+07	1.19106e+08	1.37245e+08	1.00179e+08	5.35965e+08	7.12298e+07	1.69323e+07	3.95924e+07	5.12788e+07	9.37978e+07	9.85242e+07	2.8469e+07	4.57906e+07	2.71318e+08	5.37475e+07	8.48874e+07
HU-210	1.04956e+08	1.078e+08	9.80618e+07	9.1546e+07	1.50739e+08	1.67495e+08	1.6358e+08	1.80134e+08	1.11448e+08	1.22645e+08	1.16912e+08	1.126e+08	1.60348e+08	3.97039e+07	1.06533e+08	1.40066e+08	1.19528e+08	1.65353e+08	1.15423e+08	1.62906e+08	1.42553e+08	1.60741e+08	7.65646e+07	1.15125e+08	7.45695e+07	1.53153e+08	6.38473e+07	5.78723e+07
Helvolic acid	2.60858e+09	4.87724e+09	2.8276e+08	3.79011e+09	6.29053e+08	6.05138e+08	3.97459e+08	1.33377e+09	7.00419e+08	1.61666e+08	2.98175e+08	7.90783e+08	1.66603e+09	4.58899e+08	4.09539e+08	1.3109e+08	4.30675e+09	1.64909e+09	5.17229e+08	6.08121e+08	1.21041e+09	1.88075e+09	2.06336e+09	5.1603e+08	3.3248e+09	1.55143e+09	7.85035e+08	1.00162e+09
Hexadecanamide	5.42944e+08	4.82278e+08	6.11304e+08	7.24031e+08	4.22673e+08	6.62563e+08	3.92466e+08	4.54494e+08	4.96792e+08	2.96609e+08	4.14541e+08	7.53383e+08	3.39902e+08	2.66207e+08	3.22847e+08	4.33503e+08	2.93014e+08	3.98968e+08	4.03092e+08	2.84226e+08	3.50957e+08	3.39149e+08	3.06749e+08	3.89367e+08	3.22739e+08	3.6702e+08	2.35862e+08	3.00251e+08
Hexadecanedioic acid	1.30957e+09	2.87418e+09	1.30788e+09	1.58093e+09	1.55479e+09	2.23189e+09	1.22037e+09	1.77664e+09	1.03445e+09	1.53953e+09	2.46076e+09	2.32643e+09	2.33527e+09	2.03903e+09	2.04878e+09	2.13781e+09	1.9456e+09	3.55092e+09	3.22308e+09	1.55306e+09	2.87556e+09	1.56336e+09	1.06176e+09	1.81038e+09	2.22777e+09	1.38865e+09	3.39332e+09	3.4187e+09
Hexanoylcarnitine	2.16082e+09	1.89151e+09	5.50331e+07	1.01393e+08	2.09255e+09	1.28361e+08	1.5525e+09	2.49e+09	3.22077e+09	1.51134e+08	6.78531e+07	1.42374e+08	1.94463e+08	1.31047e+08	1.48682e+08	1.56791e+08	1.10083e+08	1.80337e+08	9.17804e+07	1.9722e+09	1.50392e+08	1.56534e+08	1.63798e+08	9.50873e+07	9.98624e+07	9.44131e+07	1.91946e+08	1.97023e+08
Histamine	2.41036e+10	3.31381e+10	2.22454e+09	3.69878e+10	4.3633e+10	1.986e+09	3.35034e+10	4.39956e+10	5.80775e+10	8.84797e+10	2.87911e+10	3.40845e+10	1.02387e+09	3.65368e+10	6.11407e+10	5.27306e+10	4.95471e+10	4.69355e+10	3.71753e+10	2.39894e+10	2.32524e+10	2.72979e+10	4.34536e+10	2.57863e+10	1.99381e+10	4.22349e+10	3.73233e+10	5.11669e+10
Hydrocinnamic acid	9.52723e+08	1.08633e+09	1.68344e+09	1.03383e+09	8.24028e+08	1.44292e+09	1.57993e+09	1.26272e+09	6.46371e+08	1.82691e+09	1.64294e+09	6.26733e+08	2.65081e+09	1.69792e+09	1.02442e+09	1.40264e+09	2.22675e+09	2.41154e+09	8.80336e+09	1.92895e+09	3.16751e+09	2.57146e+09	3.84177e+09	1.80345e+09	1.70163e+09	1.78299e+09	1.09428e+09	1.5137e+09
Hydrolyzed fumonisin B1	5.16232e+09	4.73301e+09	6.89187e+09	5.85491e+09	4.59256e+09	5.91422e+09	4.84092e+09	6.40525e+09	4.99275e+09	4.06852e+09	6.10893e+09	4.88787e+09	5.65913e+09	4.04186e+09	4.11984e+09	4.65629e+09	5.6377e+09	3.6287e+09	6.12292e+09	5.64946e+09	4.76327e+09	6.38789e+09	4.47194e+09	6.6336e+09	5.71681e+09	4.58981e+09	4.25434e+09	4.65732e+09
Hypoxanthine	7.15946e+10	8.07855e+10	6.62929e+10	7.19482e+10	6.93055e+10	6.08371e+10	6.92042e+10	5.91698e+10	4.72081e+10	8.65068e+10	8.72458e+10	6.9515e+10	8.78513e+10	9.0763e+10	8.2095e+10	9.33637e+10	1.0516e+11	8.42507e+10	8.24657e+10	7.17983e+10	8.24424e+10	9.79021e+10	8.6591e+10	8.84217e+10	6.90177e+10	1.03395e+11	6.39605e+10	8.69392e+10
ILK	1.78767e+09	1.24712e+09	2.35044e+09	1.31458e+09	1.42042e+09	7.14326e+08	1.0114e+09	9.30235e+08	3.78099e+09	5.78949e+09	2.54528e+09	1.88902e+09	1.00855e+09	9.33197e+08	1.0516e+09	2.46919e+09	7.19853e+08	7.42068e+08	1.40269e+09	5.97955e+08	6.28479e+08	4.42922e+08	6.43341e+08	7.3848e+08	5.36415e+08	1.10535e+09	1.24408e+09	3.03536e+09
INH	3.51578e+08	5.11792e+08	2.68636e+08	6.78746e+08	4.61686e+08	5.72503e+08	4.57268e+08	5.91113e+08	4.02897e+08	5.11741e+08	4.04378e+08	9.34826e+08	1.49742e+08	2.94131e+08	2.67205e+08	6.0506e+08	2.79953e+08	4.58443e+07	4.8887e+08	3.756e+07	3.20769e+07	4.9809e+07	8.77898e+07	7.14341e+07	3.65976e+07	1.03689e+08	5.61288e+08	3.81012e+08
IRH	1.14811e+08	9.66585e+07	9.94098e+07	1.01394e+08	8.44314e+07	8.95816e+07	7.67976e+07	8.79713e+07	9.70804e+07	8.89782e+07	7.67956e+07	9.89749e+07	4.9466e+07	9.83981e+07	1.05355e+08	1.04439e+08	5.11419e+07	5.13703e+07	8.9976e+07	1.00822e+08	4.30831e+07	6.24663e+07	5.51238e+07	3.9155e+07	3.66445e+07	1.11152e+08	9.30767e+07	1.0332e+08
Imatinib	5.61155e+08	7.74208e+08	5.70843e+08	2.20114e+08	1.71127e+08	1.08632e+09	7.33969e+08	4.21847e+08	5.56663e+08	1.73163e+08	1.70912e+08	4.28935e+08	3.33829e+08	6.77553e+08	1.42498e+09	5.25236e+08	5.15229e+08	3.67308e+08	1.63234e+09	3.16416e+08	4.93135e+08	6.04872e+08	2.50898e+08	5.03057e+08	2.04357e+08	6.23207e+08	8.15451e+07	6.70277e+07
Imidazoleacetic acid	1.18336e+10	2.24221e+10	8.97362e+09	1.36892e+10	1.81548e+10	1.95944e+10	1.36082e+10	1.61845e+10	1.07076e+10	2.80881e+10	2.50635e+10	1.57329e+10	2.15814e+10	8.25983e+09	7.97564e+09	1.56259e+10	1.68392e+10	2.2813e+10	1.66425e+10	1.81575e+10	1.88779e+10	1.94526e+10	3.11214e+10	3.36723e+10	1.47879e+10	1.95082e+10	1.16663e+10	1.33259e+10
Imidazosagatriazinone	2.35758e+08	6.64918e+07	4.53897e+08	1.71673e+08	8.58737e+07	4.38339e+08	1.99878e+08	9.50186e+07	3.59552e+07	3.19899e+07	6.45593e+07	3.3057e+08	2.46156e+07	5.81959e+07	9.20761e+07	1.32694e+08	2.53511e+07	3.0869e+07	1.3132e+08	3.8244e+07	2.55978e+07	3.37811e+07	2.13465e+07	2.80244e+07	2.96755e+07	3.41823e+07	1.60657e+08	3.40619e+07
Indole-3-acetic acid	2.75854e+09	4.68365e+09	2.4879e+09	5.17633e+09	2.88225e+09	2.62171e+09	2.1333e+09	3.99584e+09	2.84641e+09	5.06679e+09	4.18463e+09	2.00413e+09	3.9746e+09	1.71765e+09	5.32531e+09	4.08647e+09	5.38108e+09	7.78114e+09	3.94853e+09	3.2237e+09	1.08088e+10	3.89435e+09	3.05775e+09	3.35565e+09	2.47091e+09	2.52268e+09	3.37958e+09	2.74023e+09
Indole-3-lactic acid	1.41958e+10	1.68582e+10	2.56416e+09	1.36267e+10	1.58551e+10	2.18537e+10	1.26197e+10	1.84991e+10	1.29531e+10	3.40484e+10	8.86572e+09	8.86562e+09	1.8477e+09	3.99233e+09	1.14924e+10	5.55272e+09	3.94523e+09	3.21233e+10	4.12769e+09	5.34714e+09	1.84243e+10	3.15983e+09	3.81611e+09	1.32752e+09	1.66518e+09	1.72258e+10	9.85884e+09	3.11989e+09
Ipronidazole	2.08793e+08	3.83143e+08	3.1857e+08	4.6819e+08	2.0476e+08	3.89843e+08	2.65017e+08	3.07093e+08	3.52819e+08	4.71205e+08	7.68342e+08	4.15933e+08	1.02477e+09	7.22669e+08	3.56706e+08	3.39509e+08	6.78525e+08	1.09895e+09	3.89281e+08	6.74442e+08	2.52596e+08	3.22704e+08	2.89933e+08	5.48188e+08	2.36981e+08	5.23123e+08	2.25476e+08	1.14733e+09
Irganox 1098	1.37601e+08	1.83675e+08	2.42346e+08	2.13973e+08	1.97876e+08	2.40876e+08	2.26618e+08	2.25688e+08	2.75335e+08	2.25329e+08	1.02551e+08	5.51718e+07	1.53751e+08	2.63457e+08	4.51162e+08	2.05547e+08	1.28817e+08	1.44308e+08	2.82383e+08	1.75238e+08	2.93793e+08	1.46841e+08	9.61541e+07	1.08098e+08	1.25995e+08	9.08296e+07	3.8672e+08	3.71499e+08
Isobutyraldehyde	8.02416e+09	6.73353e+08	6.20155e+08	6.59753e+08	5.15088e+08	7.31853e+08	5.24098e+08	3.02905e+09	1.36431e+09	4.54911e+09	3.67573e+09	5.2938e+08	5.45467e+08	9.24196e+08	6.91104e+08	4.68277e+09	2.02845e+09	1.48649e+09	6.79468e+08	1.68981e+09	1.20407e+09	1.65441e+09	1.73562e+09	1.64896e+09	6.53473e+08	4.46273e+09	5.63378e+08	4.95804e+09
Isobutyric acid	1.1342e+11	1.1644e+11	1.61169e+11	1.82215e+11	1.37169e+11	7.84835e+10	1.41692e+11	1.42828e+11	1.25987e+11	2.24091e+11	1.63409e+11	7.92596e+10	1.42584e+11	1.00472e+11	1.13153e+11	1.88186e+11	8.85407e+10	1.68146e+11	1.53279e+11	9.75461e+10	1.51853e+11	1.56636e+11	1.58839e+11	1.26375e+11	8.89123e+10	1.45404e+11	1.12668e+11	1.44696e+11
Isocytosine	1.23353e+10	1.31549e+10	1.85582e+09	2.95034e+09	7.61298e+09	8.18111e+09	3.5623e+09	4.99571e+09	3.04203e+09	2.38905e+09	2.49471e+09	4.72362e+09	3.14054e+09	1.70389e+10	5.03692e+09	6.81665e+09	7.00124e+09	5.19091e+09	2.6279e+09	7.9387e+09	6.71886e+09	2.78164e+09	2.18577e+09	3.14094e+09	1.2161e+09	3.81506e+09	2.23748e+09	1.20431e+09
Isoleucine	4.63942e+11	4.00536e+11	3.73637e+11	3.40537e+11	2.83547e+11	2.55879e+11	2.80817e+11	2.9877e+11	4.02121e+11	2.76749e+11	2.18916e+11	2.89605e+11	9.01569e+10	4.2875e+11	4.18393e+11	3.23445e+11	1.9046e+11	1.24128e+11	3.05493e+11	9.21228e+10	8.8735e+10	1.25026e+11	1.49495e+11	8.79306e+10	1.02611e+11	5.39719e+11	3.50617e+11	3.8727e+11
Isophthalic acid	1.04057e+09	1.24457e+09	9.83029e+08	8.49667e+08	1.599e+09	1.13619e+09	1.13634e+09	2.41323e+09	1.13415e+09	1.06695e+09	9.55223e+08	1.04621e+09	8.08721e+08	1.11159e+09	1.282e+09	9.87163e+08	4.38481e+09	1.50221e+09	1.6015e+09	1.25112e+09	1.33739e+09	1.34204e+09	2.45943e+09	1.19658e+09	1.1967e+09	1.40231e+09	2.85212e+09	2.73343e+09
Isoquinoline	4.16456e+09	2.27088e+09	4.28348e+09	3.14417e+09	2.73148e+09	2.23806e+09	2.12567e+09	2.6175e+09	3.70502e+09	2.6384e+09	1.85721e+09	2.85433e+09	6.66807e+08	3.84404e+09	3.25324e+09	3.22228e+09	1.75859e+09	8.40585e+08	3.71016e+09	6.56232e+08	6.85834e+08	6.53473e+08	2.03073e+09	1.17787e+09	6.49038e+08	4.09919e+09	2.59668e+09	3.74803e+09
Isorhapontigenin	2.40929e+09	4.4218e+08	1.58841e+09	9.81611e+09	6.52986e+08	5.2244e+08	4.92198e+08	1.93946e+10	3.41119e+08	2.89591e+10	8.18686e+08	4.52923e+10	5.30719e+09	1.02596e+08	1.02518e+09	1.9318e+10	4.39045e+07	5.14463e+08	5.03782e+09	2.6976e+09	3.75889e+08	8.5583e+08	1.35586e+08	5.32769e+08	1.91495e+08	7.72226e+07	5.87068e+08	5.50877e+08
Isovanillic acid	9.34838e+08	8.73908e+08	5.36185e+08	9.54941e+08	3.40242e+09	3.80347e+09	5.4978e+09	4.96732e+09	3.73293e+09	1.23627e+09	6.42931e+08	2.56364e+09	9.07012e+08	6.33188e+08	1.0891e+09	7.43722e+08	1.80862e+09	1.23897e+09	5.72298e+08	2.15396e+09	1.92736e+09	1.51491e+09	2.86362e+09	3.16173e+09	8.18318e+08	9.86291e+09	9.35041e+08	1.13806e+09
JWH-203	7.73521e+08	2.34163e+08	2.99204e+08	7.26189e+08	1.26061e+09	8.2115e+08	1.1775e+09	5.03722e+08	1.48065e+09	1.0977e+08	1.56979e+08	8.38178e+08	2.80344e+07	7.85384e+07	4.36546e+08	2.55492e+08	4.19337e+07	1.15373e+08	2.40133e+08	1.91478e+08	1.53904e+08	9.89004e+07	3.67396e+08	5.85518e+07	3.10796e+07	5.65485e+08	9.82923e+08	1.23344e+08
Jasmonic acid	2.13946e+09	2.85413e+09	1.91046e+09	2.54144e+09	2.02893e+09	1.91402e+09	1.95875e+09	2.36922e+09	1.88385e+09	3.40241e+09	7.45511e+08	1.98782e+09	9.64717e+08	2.68504e+09	3.18053e+09	2.4907e+09	1.92394e+09	3.05035e+09	6.3729e+08	2.51713e+09	2.89331e+09	2.8222e+09	8.5185e+08	3.22292e+09	1.15963e+09	2.86321e+09	2.6539e+09	3.58596e+09
Kanosamine	8.00785e+09	4.73314e+09	1.06361e+10	4.35903e+09	1.41028e+09	3.20807e+09	5.16792e+09	3.4861e+09	2.93292e+09	3.2355e+09	2.75924e+09	1.17729e+09	4.23113e+09	2.48524e+09	5.78972e+09	3.20781e+09	1.60912e+09	2.59189e+09	2.7957e+08	3.49169e+09	9.24538e+08	1.65247e+08	2.63639e+09	2.24391e+09	7.72209e+08	3.82421e+09	5.02391e+09	7.12553e+08
Kynurenic acid	6.3931e+09	8.77654e+09	7.64922e+09	8.41803e+09	7.96473e+09	6.33822e+09	6.81339e+09	7.66213e+09	7.51756e+09	7.9098e+09	9.32431e+09	7.85874e+09	1.88818e+10	8.25012e+09	9.92635e+09	8.27316e+09	6.42348e+09	8.17772e+09	8.65867e+09	7.13026e+09	7.70016e+09	6.95933e+09	6.8905e+09	8.83981e+09	6.65743e+09	7.93265e+09	7.84847e+09	8.215e+09
L-(+)-Arginine	6.45827e+08	2.66765e+09	2.26361e+10	1.1302e+10	1.67907e+10	1.49921e+10	1.54426e+09	6.32194e+08	1.30212e+09	1.30255e+10	5.66718e+08	2.86755e+09	3.77916e+08	8.6219e+08	4.56597e+09	3.03586e+09	3.3532e+09	6.43484e+08	1.77986e+09	2.0829e+08	7.36302e+08	3.34578e+08	6.68578e+08	2.59037e+08	6.34189e+08	2.70817e+09	8.60619e+09	3.55253e+10
L-(+)-Citrulline	1.19347e+10	1.38945e+10	2.67949e+09	8.42105e+09	1.90941e+09	1.58563e+09	1.36257e+10	1.25238e+10	9.28015e+09	2.7928e+08	5.13246e+09	6.65056e+09	3.30771e+09	9.80428e+09	7.461e+09	8.29457e+09	2.81127e+09	2.78507e+09	1.06115e+10	1.72744e+09	1.59806e+09	2.90507e+09	1.32692e+09	1.11207e+09	2.7875e+09	7.42565e+09	3.2555e+09	2.58428e+09
L-(-)-Methionine	3.723e+10	6.3786e+10	3.16747e+10	4.33675e+10	3.67358e+10	5.17462e+10	3.93116e+10	4.30277e+10	4.98416e+10	2.74076e+10	2.21379e+10	3.37817e+10	3.93343e+09	5.59796e+10	6.82306e+10	2.73539e+10	2.64461e+10	1.06742e+10	6.09694e+10	1.52907e+10	1.0965e+10	1.72024e+10	1.10585e+10	1.33682e+10	1.88153e+10	5.54354e+10	3.99592e+10	4.27799e+10
L-Aspartic acid	2.12824e+10	1.33689e+10	1.50617e+10	1.36545e+10	1.51806e+10	9.89514e+09	1.66162e+10	1.04855e+10	1.59633e+10	1.11512e+10	8.68842e+09	1.59392e+10	2.87148e+09	3.00386e+10	2.23902e+10	2.28981e+10	8.22395e+09	4.3975e+09	1.12279e+10	2.92473e+09	3.39593e+09	3.58591e+09	4.96047e+09	2.32314e+09	2.50441e+09	1.52209e+10	1.70862e+10	2.22116e+10
L-Cysteinesulfinic acid	9.58532e+08	1.4554e+09	1.08076e+09	1.55821e+09	1.1745e+09	9.96255e+08	1.165e+09	1.38367e+09	1.47146e+09	1.4621e+09	1.54521e+09	1.62038e+09	7.13751e+08	9.94485e+08	1.24226e+09	1.15402e+09	1.336e+09	9.19136e+08	1.11999e+09	2.1237e+09	9.09422e+08	1.49955e+09	7.73752e+08	1.72563e+09	1.13664e+09	1.52824e+09	1.09169e+09	1.98316e+09
L-Glutamic acid	4.6814e+10	3.79133e+10	4.02776e+10	3.47399e+10	3.21498e+10	2.66114e+10	3.31487e+10	2.75167e+10	4.0094e+10	3.53081e+10	4.00934e+10	4.36291e+10	1.95145e+10	6.2531e+10	5.67721e+10	4.88219e+10	3.21425e+10	2.39947e+10	4.14639e+10	1.67555e+10	2.03025e+10	2.04237e+10	1.87828e+10	1.81002e+10	1.86143e+10	4.20695e+10	4.80116e+10	6.20361e+10
L-Histidine	7.32997e+10	1.87843e+10	5.53899e+10	3.51807e+10	8.70817e+09	1.37373e+10	2.40795e+10	1.06776e+10	1.35934e+10	6.00638e+09	1.10178e+10	1.01648e+10	5.25805e+09	2.25508e+10	3.08413e+10	2.87262e+10	4.57564e+09	5.77577e+09	1.60622e+10	5.25731e+09	6.0155e+09	5.27224e+09	4.7759e+09	5.25026e+09	5.8579e+09	2.25117e+10	2.83894e+10	2.96622e+10
L-Isoleucine	1.9449e+09	1.80119e+09	2.17145e+09	2.56121e+09	2.90897e+09	2.23097e+09	2.50089e+09	2.6915e+09	3.60156e+09	3.1252e+09	2.17143e+09	2.68907e+09	2.24271e+09	2.85946e+09	1.66746e+09	1.26377e+09	1.62016e+09	1.86614e+09	2.10449e+09	2.88842e+09	1.79741e+09	2.53365e+09	1.2076e+09	1.91184e+09	1.57036e+09	9.1344e+08	1.54721e+09	1.55405e+09
L-Lysine	9.45673e+10	9.31858e+10	8.62817e+10	8.01686e+10	5.23101e+10	6.59445e+10	6.65312e+10	6.44087e+10	8.72442e+10	6.23531e+10	6.69746e+10	8.42625e+10	3.03789e+10	1.00031e+11	1.1283e+11	1.02427e+11	4.46156e+10	2.47987e+10	1.00825e+11	2.66561e+10	2.36555e+10	2.67646e+10	4.00488e+10	2.59614e+10	3.01681e+10	9.87479e+10	8.36956e+10	1.17389e+11
L-Phenylalanine	1.16711e+12	1.15097e+12	1.09e+12	1.25939e+12	8.93817e+11	7.69236e+11	8.32949e+11	834842795999	1.15531e+12	8.64286e+11	9.34982e+11	9.46821e+11	3.25643e+11	1.39851e+12	1.36159e+12	1.50414e+12	5.46042e+11	3.63592e+11	1.02183e+12	2.62469e+11	2.68603e+11	3.156e+11	7.24865e+11	2.72238e+11	3.0323e+11	1.20204e+12	9.31041e+11	1.16603e+12
L-Saccharopine	1.69132e+08	1.66046e+08	1.8444e+08	2.09531e+08	6.99735e+07	1.06303e+08	1.68191e+08	1.41902e+08	2.14747e+08	3.05754e+08	1.34927e+08	2.61011e+08	2.59518e+08	2.15012e+08	1.5298e+08	2.73069e+08	5.52337e+08	2.20361e+08	3.34645e+08	1.74727e+08	1.19818e+08	9.95331e+07	8.37745e+07	9.81525e+07	4.48509e+08	8.18846e+07	1.08722e+08	2.57531e+08
L-Threonine	5.51254e+08	4.69644e+08	2.13995e+08	3.08448e+08	3.62321e+08	8.30775e+08	2.85534e+08	6.08353e+08	6.26876e+08	1.82853e+08	1.75378e+08	3.7297e+08	3.58872e+07	5.51261e+08	4.10288e+08	4.13587e+08	4.19955e+07	3.54525e+07	6.23396e+08	3.48575e+07	3.67723e+07	4.49438e+07	8.11864e+07	5.95541e+07	3.92765e+07	3.17466e+08	4.47978e+08	4.35314e+08
L-Tyrosine	7.19425e+10	7.10618e+10	6.03203e+10	6.10641e+10	5.38126e+10	5.67296e+10	4.90863e+10	6.49102e+10	6.63472e+10	5.42111e+10	3.90513e+10	5.50666e+10	1.65228e+10	6.78296e+10	6.9517e+10	5.06764e+10	3.49032e+10	2.4236e+10	5.10342e+10	1.97324e+10	2.02757e+10	2.58199e+10	3.14395e+10	2.02936e+10	2.10133e+10	7.6824e+10	5.47458e+10	6.37789e+10
L-Valine	3.33407e+10	2.38519e+10	1.69679e+11	2.59161e+10	2.35608e+10	4.28809e+10	2.0765e+10	2.739e+10	1.50059e+11	2.37998e+10	6.40419e+10	2.28496e+10	6.30419e+10	3.68375e+10	3.17789e+10	2.81278e+10	2.91313e+10	3.05753e+10	1.0364e+11	1.30704e+10	4.01307e+10	1.6055e+10	3.13614e+10	1.27806e+10	2.73889e+10	2.73511e+10	2.91186e+10	3.54214e+10
LLK	2.66676e+09	2.61936e+09	2.79483e+09	1.34271e+09	1.68564e+09	2.76088e+09	1.53016e+09	2.05375e+09	3.50823e+09	7.66013e+08	4.54642e+09	6.18496e+09	1.04137e+09	4.38061e+09	3.22551e+09	4.7212e+09	1.37341e+09	4.86293e+08	4.41985e+09	3.11666e+08	4.51193e+08	3.39485e+08	7.5365e+08	4.06458e+08	5.35986e+08	4.43241e+09	3.62037e+09	4.18641e+09
LNK	5.15621e+08	7.59444e+08	4.08875e+08	4.41381e+08	7.75158e+08	7.15153e+08	4.63327e+08	5.67715e+08	1.03516e+09	4.22649e+08	4.88678e+08	1.34383e+09	7.65399e+07	5.04773e+08	9.08777e+08	5.94122e+08	2.80855e+08	7.68332e+07	1.16237e+09	1.58653e+08	1.67369e+08	8.34986e+07	7.1378e+07	8.91346e+07	9.03147e+07	8.71396e+08	4.50826e+08	5.59953e+08
LPH	4.39884e+08	5.36703e+08	4.4798e+08	1.26064e+09	4.57284e+08	7.64846e+08	5.2601e+08	1.15648e+09	3.57349e+08	4.4119e+08	8.46474e+08	1.42819e+09	1.71652e+08	2.98267e+08	4.5533e+08	6.85246e+08	1.74913e+08	1.97578e+08	1.56559e+09	8.6786e+07	8.83818e+07	1.28239e+08	9.81507e+07	1.19137e+08	3.63382e+08	3.24926e+08	3.72488e+08	2.89582e+08
LSD-d3	2.13147e+08	2.10174e+08	1.17967e+08	1.18477e+08	1.09075e+08	1.03898e+08	1.58364e+08	1.40986e+08	2.11335e+08	1.3005e+08	1.78611e+08	1.50971e+08	1.12089e+08	5.35676e+08	2.62648e+08	2.77785e+08	2.35295e+08	1.42251e+08	2.15973e+08	1.8863e+08	1.62573e+08	1.99723e+08	8.70714e+07	1.03472e+08	7.62061e+07	2.20113e+08	2.53654e+08	2.15147e+08
Labdanolic acid	1.26222e+08	1.13332e+08	6.94193e+07	1.15632e+08	1.82726e+08	1.20123e+08	1.68151e+08	1.38271e+08	1.90082e+08	1.5771e+08	1.62491e+08	2.16878e+08	1.9482e+08	1.41134e+08	8.34865e+07	2.01373e+08	1.40887e+08	8.11708e+07	1.05765e+08	1.23526e+08	1.32967e+08	1.93022e+08	1.0489e+08	1.61307e+08	1.09986e+08	1.78901e+08	1.4504e+08	1.63994e+08
Lactamide	2.54148e+09	3.14637e+09	1.02137e+09	1.68911e+09	2.12621e+09	1.34172e+10	2.6189e+09	3.08554e+09	3.44258e+09	7.86326e+08	1.34227e+09	2.25549e+09	9.32247e+08	2.32565e+09	2.89988e+09	2.74252e+09	2.79084e+08	7.12435e+08	1.87019e+09	2.11137e+08	6.80306e+08	5.7969e+08	4.47255e+08	7.91488e+08	5.29483e+08	1.79261e+09	2.34055e+09	2.18882e+09
Lauric acid	1.14855e+10	1.26062e+10	1.30013e+10	1.1891e+10	1.01051e+10	1.13769e+10	1.06221e+10	1.10486e+10	1.09756e+10	1.09072e+10	1.70432e+10	9.30225e+09	1.74588e+10	1.3201e+10	1.48981e+10	1.24176e+10	1.3735e+10	1.55072e+10	1.4982e+10	1.17747e+10	1.36313e+10	1.51258e+10	1.23831e+10	1.32727e+10	1.59322e+10	1.08715e+10	1.24287e+10	1.81051e+10
Leucylproline	1.06686e+11	1.34309e+11	1.17535e+11	1.79379e+11	1.45081e+11	1.97939e+11	1.14836e+11	1.3273e+11	1.34187e+11	8.87769e+10	7.36875e+10	1.62595e+11	1.97936e+11	1.0373e+11	1.06377e+11	1.1489e+11	64771470061	5.43048e+10	4.40826e+11	3.91956e+10	2.62131e+10	2.33087e+10	2.53659e+10	4.79287e+10	3.33549e+10	1.20026e+11	1.47911e+11	1.47973e+11
Levodropropizine	2.39431e+11	2.44384e+11	1.45881e+11	2.58687e+11	2.4315e+11	1.6485e+11	2.10328e+11	6.90095e+08	5.49447e+09	1.18852e+09	2.64091e+11	1.91188e+11	2.98456e+11	2.0465e+11	1.98159e+11	2.69047e+11	1.75822e+11	2.02841e+11	1.98757e+11	2.14028e+11	3.38085e+09	3.19639e+11	2.54439e+11	2.54893e+11	1.43796e+11	2.2288e+11	7.85832e+10	1.85411e+09
Levorphanol	5.4261e+09	5.46464e+09	1.3057e+10	9.49061e+09	5.88389e+09	9.31952e+09	7.13698e+09	7.81959e+09	7.38371e+09	1.12328e+10	3.93657e+09	3.92077e+09	1.67197e+10	2.08842e+09	5.12285e+09	7.76094e+09	5.67636e+09	6.38464e+09	7.65117e+09	1.06845e+10	1.12507e+10	1.12462e+10	7.29792e+09	1.27766e+10	1.23154e+10	6.61742e+09	4.90123e+09	4.14459e+09
Linoleic Acid	2.63072e+08	2.36531e+08	2.54488e+08	2.16383e+08	2.28747e+08	3.25104e+08	1.95737e+08	2.97716e+08	2.80529e+08	2.96389e+08	2.37812e+08	2.54573e+08	2.24578e+08	5.12729e+08	3.24686e+08	2.41113e+08	2.29214e+09	4.10607e+08	3.21822e+08	6.0627e+08	1.33586e+09	2.36879e+09	2.68767e+09	3.34905e+09	1.06127e+09	2.36116e+08	2.56074e+08	3.64011e+08
Linoleic acid	9.66517e+10	1.04825e+11	9.90841e+10	9.2675e+10	9.02335e+10	8.59819e+10	8.39136e+10	8.57535e+10	1.00582e+11	9.84001e+10	9.57291e+10	9.54646e+10	1.00653e+11	1.07012e+11	9.77431e+10	1.07445e+11	8.23733e+10	9.61062e+10	1.04109e+11	1.04434e+11	1.04084e+11	9.84097e+10	8.67714e+10	9.11816e+10	7.68056e+10	1.06338e+11	9.77482e+10	8.48954e+10
Linoleoyl ethanolamide	1.11152e+10	2.87075e+09	5.37913e+09	4.59747e+09	4.33727e+09	7.35285e+09	3.15498e+09	9.53529e+09	1.81711e+10	5.60127e+09	3.06006e+09	3.27108e+09	5.9756e+09	2.02868e+09	2.04099e+09	3.90636e+09	5.33443e+09	5.62678e+09	3.17055e+09	7.66729e+09	5.52975e+09	5.90312e+09	6.73631e+09	3.27575e+09	2.31636e+09	3.32399e+09	2.3149e+09	2.25473e+09
Lithocholic Acid	9.58815e+09	8.54332e+09	1.35862e+10	1.13442e+10	8.64864e+09	8.03278e+09	7.71992e+09	7.77171e+09	1.21727e+10	1.25937e+10	1.24914e+10	9.4739e+09	8.98823e+09	8.02158e+09	7.42234e+09	1.16982e+10	1.13416e+10	2.48212e+09	1.52273e+10	1.04138e+10	9.70962e+09	1.30992e+10	9.79516e+09	1.14396e+10	9.58364e+09	5.08463e+09	5.02624e+09	4.55328e+09
Lurasidone	2.98246e+09	2.49504e+07	5.32957e+07	4.24137e+09	4.19893e+09	4.82234e+08	7.545e+07	4.81086e+09	4.72706e+09	1.62952e+07	2.37427e+08	1.38831e+09	3.98655e+07	4.23823e+07	3.43922e+09	2.5934e+08	1.22156e+07	4.53534e+09	1.33013e+08	3.43998e+07	1.38935e+07	2.5349e+09	3.28546e+09	2.42865e+08	2.02425e+07	2.43248e+09	7.99309e+07	6.04273e+07
Luteolin	3.27219e+08	7.24955e+08	7.06108e+09	4.88207e+08	5.74643e+08	7.70735e+09	9.59125e+08	5.03469e+08	3.02011e+08	3.36636e+08	2.51271e+09	5.56145e+08	2.91021e+09	2.57539e+09	2.18589e+09	2.14333e+08	2.6935e+09	1.84231e+09	8.12561e+08	1.18836e+08	2.57588e+09	7.49364e+08	1.37736e+09	9.0214e+07	1.60571e+09	6.03061e+08	6.42935e+09	1.01585e+08
MBZP	1.52926e+09	1.53579e+09	1.75145e+09	1.52867e+09	1.35809e+09	1.48047e+09	1.45226e+09	1.72028e+09	1.87873e+09	2.1121e+09	1.57706e+09	1.63298e+09	2.86798e+09	1.40373e+09	1.61265e+09	1.58658e+09	9.09484e+08	1.85016e+09	1.8013e+09	1.8202e+09	1.50771e+09	1.71783e+09	2.08481e+09	1.89495e+09	1.86815e+09	1.38438e+09	1.85512e+09	1.64925e+09
MCOPPB	3.15584e+08	3.39358e+08	3.31442e+08	2.77338e+08	2.65135e+08	3.58593e+08	5.22716e+08	2.69789e+08	2.62612e+08	2.29177e+08	2.913e+08	5.44153e+08	9.26202e+08	9.99529e+07	1.39281e+08	4.2005e+08	1.35825e+08	1.0725e+08	6.69583e+08	2.38633e+08	5.09493e+08	1.75852e+08	2.0483e+08	4.96063e+08	3.94784e+08	3.61322e+08	8.16625e+08	4.21724e+08
Manidipine	3.84774e+08	1.96716e+08	4.17256e+08	3.27595e+08	2.71347e+08	2.36631e+08	2.40447e+08	2.19627e+08	2.72326e+08	2.74902e+08	3.01249e+08	1.90868e+08	2.82171e+08	2.38766e+08	2.20907e+08	3.6838e+08	3.27662e+08	2.88534e+08	2.28954e+08	2.77439e+08	3.51043e+08	3.23859e+08	2.75008e+08	3.022e+08	1.95959e+08	2.27403e+08	1.85361e+08	2.22197e+08
Methionine	2.31384e+09	8.77887e+08	1.21308e+09	1.39299e+09	7.38789e+08	1.3361e+09	7.94859e+08	2.17544e+09	2.29966e+09	1.49728e+09	1.19773e+09	2.69712e+09	6.64881e+08	1.59498e+09	2.39685e+09	1.57076e+09	1.16266e+09	1.64216e+09	1.69377e+09	4.75037e+08	6.22531e+08	6.1409e+08	6.78508e+08	8.06967e+08	3.03818e+08	1.80508e+09	1.31455e+09	1.2788e+09
Methyl 4-{[1,3-dihydroxy-1-(4-hydroxy-3-methoxyphenyl)-2-propanyl]oxy}-3-methoxybenzoate	6.29393e+07	2.19998e+07	8.43693e+07	2.27187e+07	1.46675e+09	6.19013e+08	8.86931e+07	1.09472e+09	6.2205e+08	3.85281e+09	2.66071e+07	1.24727e+09	5.40405e+07	1.8985e+07	2.12076e+08	4.75111e+07	2.33984e+07	1.45257e+08	3.72789e+08	1.80688e+08	4.22387e+07	3.07098e+07	1.32443e+08	1.33144e+08	5.3173e+07	2.35485e+08	5.41296e+09	8.83732e+07
Methyl-1-(cyclohexylmethyl)-1H-indole-3-carboxylate	1.25914e+08	1.51176e+08	1.28415e+08	1.62132e+08	7.90154e+07	7.77523e+07	1.40641e+08	2.98473e+08	1.17554e+08	1.76644e+08	8.81872e+07	8.59608e+07	1.41992e+08	2.43055e+08	2.99071e+08	8.48455e+07	7.68334e+07	1.92135e+08	9.52289e+07	3.68308e+08	1.8564e+08	8.14408e+07	9.92504e+07	2.83963e+08	2.23836e+08	1.34427e+08	2.0166e+08	1.99518e+08
Methyl-3-aminobenzoate	2.45689e+09	3.1161e+09	2.88713e+09	2.82685e+09	2.3706e+09	2.41433e+09	2.47324e+09	3.02973e+09	3.47859e+09	2.50711e+09	2.47772e+09	2.43854e+09	2.41627e+09	3.02754e+09	2.61543e+09	2.52367e+09	1.93225e+09	2.23498e+09	2.38957e+09	2.31113e+09	2.21419e+09	2.1493e+09	1.71403e+09	2.93992e+09	2.02779e+09	2.24316e+09	2.78229e+09	3.48116e+09
Methylmalonic acid	3.69901e+09	6.20363e+09	3.89276e+09	4.78201e+09	6.8982e+09	1.06351e+10	4.924e+09	7.426e+09	8.69068e+09	6.74516e+09	7.14368e+09	6.25184e+09	6.48055e+09	4.47209e+09	5.59317e+09	5.1088e+09	8.00451e+09	3.58964e+10	5.99688e+09	4.9754e+09	6.07489e+09	4.63056e+09	5.66685e+09	6.58542e+09	5.55172e+09	1.52026e+10	5.23834e+09	6.03331e+09
Metolachlor morpholinone	4.26519e+10	1.38347e+10	4.41787e+10	3.79017e+10	3.82502e+10	3.88914e+10	7.28464e+09	4.10317e+10	5.08346e+10	4.79065e+10	1.16307e+10	4.21146e+09	4.32962e+10	3.2632e+10	2.88849e+10	3.5949e+09	1.85977e+09	2.78431e+10	1.97182e+10	2.99202e+10	2.89582e+10	1.06358e+10	3.0851e+10	4.86304e+10	1.8174e+09	3.32895e+10	3.78934e+10	5.62332e+10
Metronidazole	4.57768e+07	1.75233e+07	1.65584e+07	1.22103e+08	2.1052e+08	2.21522e+08	1.49039e+10	1.82093e+07	2.57021e+07	5.06622e+07	1.91576e+08	1.96385e+07	6.57156e+08	2.40292e+07	6.64066e+09	1.88108e+07	4.12252e+08	2.01613e+08	2.50338e+07	1.44253e+07	1.58554e+08	1.16629e+07	1.92848e+07	8.28866e+07	9.49094e+08	1.40476e+08	1.55879e+07	1.91457e+07
Milbemectin A3	2.21327e+08	1.19205e+08	2.21355e+08	1.54523e+08	1.70434e+08	1.69957e+08	1.84661e+08	8.66576e+07	2.74597e+08	8.05039e+07	1.1974e+08	2.2188e+08	6.40366e+07	1.20496e+08	6.87076e+07	1.59024e+07	4.11747e+07	1.23014e+08	2.22546e+07	1.25913e+08	1.97879e+08	1.66459e+08	1.44605e+08	1.50272e+08	1.51968e+08	1.84526e+08	1.91719e+08	1.66808e+08
Mono(2-ethylhexyl) phthalate (MEHP)	3.27265e+08	2.16e+08	4.4295e+08	2.69816e+08	2.25093e+09	1.78673e+08	1.79264e+08	2.41946e+08	2.5068e+08	3.26707e+08	3.12607e+08	3.46638e+08	2.91462e+08	1.8694e+08	1.75289e+08	3.79263e+08	8.04618e+07	2.47774e+08	2.61499e+08	3.14789e+08	3.54208e+08	2.75341e+08	2.1487e+08	4.02996e+08	1.97095e+08	3.04549e+08	4.48572e+08	2.33517e+08
Monomethyl phthalate	3.25144e+09	6.06981e+09	2.47831e+09	1.33837e+09	3.21768e+09	3.11861e+09	2.72809e+09	5.27321e+09	4.50195e+09	3.16911e+09	6.24025e+09	4.29278e+09	2.60248e+09	5.11315e+09	5.49441e+09	5.37617e+09	3.50423e+09	8.16764e+08	4.37563e+09	2.46502e+09	4.28619e+09	1.13059e+09	2.27305e+09	5.02195e+09	3.33325e+09	3.86195e+09	6.2366e+09	9.71718e+09
Moxonidine	5.32523e+08	2.02524e+09	5.29633e+08	4.52032e+08	6.50143e+08	6.57372e+08	5.25667e+08	5.2433e+08	5.56337e+08	1.60681e+09	7.67641e+08	2.2334e+08	1.52641e+09	8.46853e+08	8.06648e+08	5.54574e+08	2.73373e+08	1.1028e+09	1.81357e+09	6.96456e+08	6.13523e+08	3.49341e+08	1.10723e+09	3.40156e+08	2.6934e+08	8.14297e+08	5.43005e+08	6.9584e+08
Myriocin	1.43514e+10	1.37293e+10	8.44303e+07	1.72944e+08	1.97244e+10	1.17438e+08	1.4777e+10	1.64636e+10	2.58479e+10	8.09772e+07	4.35586e+07	5.40257e+07	3.72232e+08	7.46657e+07	9.20073e+07	7.11035e+07	3.69866e+07	7.75653e+08	4.32922e+07	2.22042e+10	5.00881e+07	1.06282e+08	2.03601e+08	4.26015e+08	8.3903e+08	7.09907e+07	7.87491e+07	1.11886e+08
Myristic acid	1.87183e+10	2.33958e+10	1.81444e+10	2.17044e+10	2.03738e+10	1.82382e+10	1.73023e+10	2.07127e+10	1.54152e+10	3.07839e+10	3.04819e+10	2.16208e+10	3.40384e+10	3.14469e+10	3.43333e+10	2.74034e+10	3.19879e+10	3.3648e+10	2.75994e+10	2.71537e+10	2.83053e+10	2.90634e+10	2.80508e+10	2.52294e+10	2.34633e+10	2.40166e+10	1.89406e+10	3.17135e+10
Myristyl sulfate	1.85591e+09	1.71966e+09	2031903578	1.84447e+09	1.58507e+09	2.06298e+09	1.93093e+09	3.85298e+09	1.84953e+09	1.65869e+09	1.51701e+09	1.7739e+09	1.61716e+09	1.52192e+09	1.62596e+09	1.65874e+09	1.57466e+09	1.98292e+09	1.6356e+09	1.8211e+09	1.23265e+09	2.15165e+09	1.14238e+09	3.2571e+09	2.41691e+09	1.66243e+09	1.49759e+09	1.53233e+09
N'',N'''-di[2-chloro-4-(dimethylamino)benzylidene]carbonic dihydrazide	3.55395e+08	1.08561e+09	1.57316e+08	5.55716e+08	3.4833e+08	3.2519e+08	5.10279e+08	4.58156e+08	4.29728e+08	1.19312e+09	4.04282e+08	9.38048e+08	2.63549e+08	6.66579e+08	5.8681e+08	4.90328e+08	3.19593e+08	4.75936e+08	2.96463e+08	4.63738e+08	4.34684e+08	3.89086e+08	3.64431e+08	4.31985e+08	5.44748e+08	1.04034e+09	6.04416e+08	2.43075e+08
N'-(4,5-dihydronaphtho[1,2-d][1,3]thiazol-2-yl)-N,N-dimethyliminoformamide	4.03575e+07	3.63278e+07	3.94312e+07	9.0984e+07	5.64021e+07	1.17893e+08	1.3283e+08	5.98385e+07	4.53943e+08	2.06981e+08	4.15548e+07	5.0771e+07	1.47796e+08	5.27253e+07	1.0789e+08	9.90791e+07	4.92953e+07	1.44233e+08	1.51832e+08	6.37102e+07	8.16295e+07	1.28081e+08	6.0468e+07	4.09337e+07	2.26848e+07	1.29594e+08	3.83858e+08	4.13133e+08
N'-(cyclohexylcarbonyl)-4-methyl-1,2,3-thiadiazole-5-carbohydrazide	3.1691e+07	4.40634e+07	4.69259e+07	2.75706e+07	6.91528e+07	7.68905e+07	1.63981e+07	1.42028e+08	2.69209e+07	3.23738e+08	1.43862e+07	2.11903e+07	1.63078e+07	7.1967e+07	3.15864e+07	1.42208e+08	1.69369e+07	1.14766e+07	2.05424e+07	1.09469e+07	4.90799e+07	5.87436e+07	1.18569e+07	4.04978e+07	1.11084e+07	2.01742e+07	3.95355e+08	9.39273e+07
N'-Cyano-N-[2-(trifluoromethyl)phenyl]pyrrolidine-1-carboximidamide	2.09205e+09	3.58224e+09	2.78949e+09	3.1557e+09	2.62054e+09	2.18103e+09	2.28444e+09	2.38208e+09	2.55914e+09	8.41515e+09	7.20913e+09	4.68989e+09	6.64666e+09	4.15247e+09	4.47599e+09	3.77959e+09	3.68061e+09	5.59141e+09	2.58116e+09	7.57648e+09	4.31372e+09	4.46479e+09	3.34271e+09	5.31719e+09	3.36391e+09	5.50616e+09	3.74575e+09	1.10161e+10
N'-hydroxy-3-nitrobenzenecarboximidamide	1.04792e+09	6.94276e+08	3.9413e+08	1.56796e+09	7.87376e+08	2.24063e+09	8.37043e+08	1.25432e+09	2.94755e+08	1.94964e+09	2.87872e+09	1.01347e+09	8.52247e+08	1.01019e+09	4.49782e+09	3.82922e+09	5.6748e+08	1.81739e+09	2.20795e+09	7.45614e+08	4.06133e+09	9.14448e+08	1.04438e+09	1.18402e+09	1.45302e+09	6.38957e+08	1.90404e+09	1.27864e+09
N'1-(2-Cyano-3-fluorophenyl)-N'1-methylethanimidohydrazide	3.15296e+09	1.47851e+09	2.67491e+09	2.50494e+09	6.4177e+08	5.94471e+08	1.48273e+09	5.45941e+08	1.10793e+09	6.43485e+08	1.29121e+09	1.63277e+09	7.0608e+07	1.03653e+09	1.05036e+09	2.8442e+09	3.17226e+08	6.10823e+08	2.01947e+09	3.50687e+08	1.37488e+08	1.9015e+08	7.8448e+08	1.77907e+08	2.70062e+08	3.04087e+09	2.08876e+09	2.60518e+09
N'2-benzylidene-5-hex-1-ynylfuran-2-carbohydrazide	7.19546e+07	3.9148e+07	1.08666e+07	2.20782e+07	1.15917e+07	2.50496e+07	2.86568e+07	2.7636e+07	2.26093e+07	1.96011e+07	6.16451e+07	1.73042e+08	1.31584e+07	1.28197e+07	1.2919e+07	1.12581e+07	1.02854e+07	4.00046e+07	1.48252e+07	1.95677e+07	1.22277e+07	6.19102e+07	1.45305e+07	1.00093e+07	2.08013e+07	2.33848e+07	8.51336e+07	1.18923e+07
N,N'-Diphenylguanidine	4.62951e+09	4.92689e+09	4.79039e+09	4.27115e+09	4.20829e+09	4.87496e+09	4.12174e+09	4.81056e+09	4.87351e+09	4.69496e+09	1.04454e+10	4.19678e+09	4.28752e+09	5.17233e+09	5.65853e+09	4.64356e+09	4.71258e+09	4.70511e+09	5.0709e+09	4.90825e+09	4.71348e+09	5.27076e+09	3.87612e+09	4.56731e+09	4.77187e+09	4.75323e+09	4.53291e+09	5.35366e+09
N,N-Diisopropylethylamine (DIPEA)	1.10661e+10	1.32718e+10	1.15507e+10	9.93427e+09	9.12871e+09	1.94336e+10	1.36557e+10	1.34716e+10	1.64815e+10	1.37788e+10	9.39004e+09	7.9091e+09	1.27361e+10	9.71462e+09	1.01355e+10	9.1844e+09	8.80795e+09	1.20224e+10	1.35478e+10	1.71239e+10	1.26964e+10	1.39532e+10	9.61503e+09	1.44571e+10	1.09903e+10	1.04361e+10	8.65817e+09	6.80109e+09
N,N-Dimethyl-4-{5-[(3S)-1-(1-methyl-4-piperidinyl)-3-pyrrolidinyl]-1,3,4-oxadiazol-2-yl}aniline	5.55316e+08	9.44632e+08	5.29062e+08	7.00487e+08	6.74601e+08	7.66569e+08	7.91175e+08	7.75117e+08	6.08113e+08	7.83889e+08	9.53318e+08	5.35894e+08	7.60649e+08	7.15119e+08	1.11758e+09	7.91102e+08	8.36362e+08	2.02389e+09	1.16286e+09	7.42297e+08	1.42642e+09	7.88841e+08	8.74692e+08	8.32609e+08	7.29973e+08	9.31423e+08	8.19238e+08	1.14133e+09
N,N-Dimethylaniline	8.7904e+09	6.3726e+09	5.82116e+09	5.65749e+09	5.55196e+09	6.26028e+09	5.52468e+09	9.21722e+09	6.50732e+09	5.87171e+09	5.80336e+09	5.669e+09	5.85003e+09	7.03994e+09	7.58761e+09	5.95786e+09	5.97582e+09	6.031e+09	6.62398e+09	6.54938e+09	5.99341e+09	6.45068e+09	4.7861e+09	5.66759e+09	5.8291e+09	6.1418e+09	5.62692e+09	6.85857e+09
N,N-Dimethyldecylamine N-oxide	3.3052e+08	3.67763e+08	2.75463e+08	3.68578e+08	2.92921e+08	3.72117e+08	3.50123e+08	3.55132e+08	2.83505e+08	2.63775e+08	3.21306e+08	2.62337e+08	2.93269e+08	3.14015e+08	4.05458e+08	2.56223e+08	3.25736e+08	1.11165e+09	2.8209e+08	3.26183e+08	2.87086e+08	3.24787e+08	2.50425e+08	2.32692e+08	3.90585e+08	2.57186e+08	2.50677e+08	2.35372e+08
N,N-dimethyl-9H-purin-6-amine	3.32106e+09	3.47666e+09	5.77992e+09	2.66416e+09	2.37421e+09	8.85285e+08	1.82975e+09	7.49406e+08	5.86886e+08	1.96414e+09	4.79097e+09	4.84375e+09	6.52656e+09	7.1083e+09	3.23007e+09	6.72213e+09	1.04074e+10	4.94078e+09	7.75039e+08	2.94561e+09	4.44367e+09	4.31916e+09	4.81236e+09	3.70642e+09	2.93809e+09	1.10833e+10	1.51925e+09	1.95645e+09
N-(1,3,4,6,7,11b-hexahydro-2H-pyrido[2,1-a]isoquinolin-2-yl)-N-methylmethanesulfonamide	1.27549e+09	1.96902e+09	2.16471e+08	8.81809e+08	1.25807e+09	1.06783e+09	9.7799e+08	1.08663e+09	8.46954e+07	9.90698e+08	5.09773e+08	1.25808e+09	8.0547e+08	1.15084e+09	1.36416e+08	7.3228e+08	1.5741e+08	1.75495e+09	3.29199e+08	7.65814e+08	5.06982e+08	3.58307e+08	7.24675e+08	5.68623e+08	4.2314e+08	7.7929e+08	3.00826e+08	1.21414e+08
N-(2-furylmethylidene)-(4-{[(2-furylmethylidene)amino]methyl}cyclohexyl)methanamine	5.5318e+08	9.28009e+08	7.18112e+08	5.71603e+08	1.15218e+09	9.65743e+08	6.01073e+08	6.71787e+08	4.41323e+08	2.62411e+08	4.15215e+08	4.13337e+08	1.67588e+08	7.58224e+08	9.51616e+08	4.78782e+08	2.06061e+08	1.73364e+08	2.2819e+08	1.33561e+08	3.34045e+08	1.25769e+08	1.6054e+08	1.16782e+08	1.60823e+08	7.52596e+08	6.86251e+08	7.71102e+08
N-(2-hydroxyphenyl)acetamide	1.10262e+09	8.83494e+08	8.14531e+08	1.22996e+09	9.52642e+08	3.66608e+09	8.87546e+08	1.26278e+09	1.08847e+09	9.74362e+08	8.36943e+08	5.44107e+08	1.68814e+09	1.34222e+09	1.52985e+09	7.76363e+08	1.4202e+09	1.49144e+09	1.26013e+09	1.678e+09	1.36028e+09	1.269e+09	1.42278e+09	1.14004e+09	7.86085e+08	1.07699e+09	2.88403e+09	1.13262e+09
N-(4-Cyanobenzyl)-2-[(1S,4S,5S)-5-isopropyl-4-{[(isopropylcarbamoyl)amino]methyl}-2-methyl-2-cyclohexen-1-yl]acetamide	1.40718e+09	1.41385e+09	1.86681e+09	2.42103e+09	1.76551e+09	1.61149e+09	9.34406e+08	1.28282e+09	1.41315e+09	2.09502e+09	2.05946e+09	1.89956e+09	3.62723e+09	9.82573e+08	1.35307e+09	3.21604e+09	3.66402e+09	3.0052e+08	2.35599e+09	3.59179e+09	1.05201e+09	3.87709e+09	4.13721e+09	2.54678e+09	1.87468e+09	2.39902e+09	7.80281e+08	7.21947e+08
N-(4-chlorophenyl)-N'-cyclohexylthiourea	1.73072e+09	2.84686e+09	3.35498e+09	1.8443e+08	2.03977e+09	2.84251e+09	1.01495e+09	2.35422e+09	5.07522e+09	2.90772e+09	1.26844e+08	2.91095e+08	5.76919e+09	5.32374e+09	3.28233e+08	1.02097e+09	5.03338e+08	4.11698e+09	4.73767e+08	4.37391e+09	6.45935e+08	2.71378e+09	3.15809e+09	2.12507e+09	1.02848e+09	3.28232e+09	3.75864e+09	5.28788e+08
N-(4-fluorophenyl)-N'-(2-piperidinophenyl)urea	7.78776e+07	8.39304e+07	3.1099e+07	4.38341e+07	8.43469e+07	8.33351e+07	9.19023e+07	7.16845e+07	6.75035e+07	1.23431e+08	4.75543e+07	4.27225e+07	1.4394e+08	8.00632e+07	1.01101e+08	1.33083e+08	4.90479e+07	1.6126e+08	5.97063e+07	1.61347e+08	5.86723e+07	8.23338e+07	4.97565e+07	9.75403e+07	5.46715e+07	6.79785e+07	3.31971e+07	2.17108e+08
N-(4-methoxy-1-methyl-1H-indazol-3-yl)-5-methyl-3-isoxazolecarboxamide	1.81129e+08	2.82345e+08	2.54078e+08	8.77305e+08	9.5517e+08	1.30625e+09	2.90185e+08	8.47035e+07	2.88965e+09	9.59284e+07	3.66553e+07	3.94574e+08	2.46913e+07	3.95721e+08	9.96567e+08	1.00488e+08	8.62035e+08	1.099e+09	4.72764e+08	6.03187e+07	6.53936e+07	3.11392e+08	1.05022e+09	3.2232e+09	2.75017e+08	8.89161e+08	6.29648e+08	3.80919e+08
N-(8-Methyl-8-azabicyclo[3.2.1]oct-3-yl)-2-(phenylsulfonyl)acetamide	1.73149e+09	1.59825e+09	8.67282e+08	1.49406e+09	2.15345e+09	2.41097e+09	2.17332e+09	2.37095e+09	1.22553e+09	1.70622e+09	2.13713e+09	3.07077e+09	3.82272e+09	2.17292e+09	1.91847e+09	1.66341e+09	1.57277e+09	1.00822e+09	1.49289e+09	1.56635e+09	1.67926e+09	1.52986e+09	2.23718e+09	3.69791e+09	1.30846e+09	1.45135e+09	1.49816e+09	1.95408e+09
N-({(2R,4S,5R)-5-[3-(4-Methoxyphenyl)-1-methyl-1H-pyrazol-5-yl]-1-azabicyclo[2.2.2]oct-2-yl}methyl)acetamide	3.95555e+09	1.28594e+10	1.87213e+10	1.29353e+10	1.67646e+10	1.61215e+10	1.54993e+10	4.86405e+09	1.68402e+10	2.20299e+10	1.72601e+10	1.77725e+10	1.88743e+10	1.78965e+10	2.44003e+10	1.66729e+09	1.86441e+10	2.39327e+10	1.10663e+10	1.63096e+10	1.10974e+10	1.23501e+10	1.50798e+10	1.20704e+10	1.54742e+10	1.97244e+10	1.82827e+10	4.92585e+09
N-({(2R,4S,5R)-5-[6-(2-Furyl)-2-methyl-4-pyrimidinyl]-1-azabicyclo[2.2.2]oct-2-yl}methyl)-2-(2-thienyl)acetamide	9.93686e+09	2.11007e+10	1.75708e+07	3.9433e+09	1.50891e+10	1.68323e+10	1.24387e+10	1.37545e+10	2.02542e+07	1.68655e+07	1.75507e+10	8.37828e+09	1.72148e+07	6.20393e+09	4.01844e+09	2.02551e+10	1.50361e+07	1.03702e+09	1.76274e+09	5.76072e+09	1.34789e+09	2.5017e+09	2.8327e+09	1.27776e+10	1.22712e+10	5.95735e+09	1.97326e+10	8.94593e+09
N-Acetyl-D-alloisoleucine	2.12356e+10	6.52903e+09	5.70294e+09	1.95312e+09	9.60227e+09	2.01007e+10	8.21029e+09	1.92407e+09	1.44999e+10	6.27808e+09	5.37839e+09	4.25249e+09	1.73477e+10	9.82763e+09	1.26639e+10	4.1833e+09	1.66644e+09	7.65173e+09	6.64068e+09	1.46817e+10	2.75242e+10	2.01644e+09	1.47278e+10	8.80588e+09	2.95353e+09	1.38106e+10	2.42235e+10	4.97742e+09
N-Acetyl-DL-glutamic acid	7.62032e+08	3.81157e+08	1.06016e+09	1.13135e+09	4.3659e+08	6.43681e+08	9.56808e+08	7.74641e+08	1.19279e+09	4.2119e+08	1.18663e+09	1.87717e+09	1.03975e+09	7.42969e+08	1.47049e+09	1.20154e+09	3.99087e+08	6.25241e+08	1.12703e+09	1.05826e+09	1.09068e+09	7.17672e+08	1.13772e+09	8.00002e+08	4.30376e+08	1.4054e+09	2.25614e+09	1.97627e+09
N-Acetyl-DL-tryptophan	2.63148e+09	3.47227e+09	3.94844e+09	1.66174e+08	3.10881e+09	4.29185e+09	1.57256e+09	3.20081e+09	7.43873e+09	3.84664e+09	4.74976e+08	6.16188e+08	4.68006e+09	5.72841e+09	2.50779e+09	1.17592e+09	4.80848e+08	5.31156e+09	7.94339e+08	5.55857e+09	3.02351e+09	2.0295e+09	4.91604e+09	3.63313e+09	2.32028e+09	5.45534e+09	6.39803e+09	7.79253e+08
N-Acetyl-L-carnosine	2.09626e+08	3.51122e+08	1.89379e+08	2.14866e+08	3.97245e+08	3.50243e+08	4.17458e+08	3.00087e+08	4.17564e+08	7.25073e+08	3.0263e+08	8.94767e+08	3.16483e+08	1.21129e+08	2.09565e+08	4.7653e+08	1.54823e+08	3.24786e+08	8.35171e+08	2.94047e+08	1.05818e+08	4.07667e+07	2.84586e+08	1.57267e+08	1.95372e+08	1.06411e+08	2.94361e+08	9.11806e+08
N-Acetyl-L-cysteine	3.52099e+10	1.18439e+09	1.10881e+10	7.71163e+08	1.38824e+10	2.26299e+10	1.11655e+09	1.46582e+10	3.54785e+10	2.44494e+10	1.3229e+09	4.47108e+08	1.93489e+10	1.10125e+10	3.48194e+10	4.98872e+08	1.51e+08	2.18313e+10	5.52825e+08	3.55041e+10	2.86224e+10	1.21561e+09	2.32512e+10	1.08398e+10	1.74935e+08	3.14128e+10	2.69553e+10	5.7851e+09
N-Acetyl-L-leucine	4.26277e+09	6.23641e+09	2.62708e+09	8.52583e+08	5.80184e+08	5.81542e+08	4.39501e+09	5.39032e+09	7.34101e+09	1.12139e+09	1.76827e+09	5.37186e+09	8.20934e+08	5.12887e+09	6.15052e+09	9.56972e+08	6.95461e+08	1.8596e+09	4.05347e+09	5.44562e+09	2.45938e+09	5.13549e+08	1.42693e+09	4.80413e+09	1.38597e+09	7.05753e+09	7.14457e+09	1.22593e+09
N-Acetyl-L-methionine	4.04908e+10	2.13454e+10	1.22456e+10	1.19149e+10	2.74505e+10	5.39844e+10	1.82464e+10	2.88161e+10	4.0882e+10	1.35659e+10	9.71337e+09	1.65696e+10	1.05305e+10	3.31882e+10	3.09777e+10	8.44285e+09	5.77345e+09	7.35719e+09	2.27177e+10	2.8999e+10	2.96016e+10	1.00333e+10	1.07415e+10	1.36157e+10	5.03067e+09	2.28492e+10	3.36188e+10	1.80353e+10
N-Acetyl-L-phenylalanine	5.60594e+09	6.40201e+09	5.696e+09	7.00541e+08	2.45072e+08	2.23494e+09	7.26871e+09	6.89778e+09	1.19364e+10	9.92457e+08	1.33572e+08	2.20696e+09	4.46621e+08	5.97546e+09	6.82152e+09	4.39024e+08	1.08245e+08	5.04478e+09	4.56322e+09	4.41998e+09	4.72066e+09	9.95109e+07	3.0238e+09	6.73663e+09	4.35051e+09	8.69711e+09	1.52087e+10	2.82119e+08
N-Acetyl-L-tyrosine	3.60666e+09	3.47813e+09	2.20388e+09	3.10021e+08	3.28645e+09	1.22043e+09	1.93361e+09	4.39375e+09	3.61396e+09	2.749e+09	1.41467e+09	2.49766e+09	2.54006e+09	7.36452e+09	1.19183e+09	1.66488e+09	1.94256e+09	2.28642e+09	2.33557e+09	4.46695e+09	2.21086e+09	2.74963e+09	1.19752e+09	3.00105e+09	6.7352e+08	1.75346e+09	7.87105e+09	4.07382e+09
N-Acetylalanine	4.32055e+09	5.2888e+09	4.58007e+09	7.64681e+09	4.70403e+09	1.23514e+10	4.53773e+09	8.2135e+09	1.18117e+10	3.56948e+09	3.41496e+09	3.13341e+09	3.11821e+09	4.61336e+09	7.11262e+09	3.3667e+09	2.95387e+09	3.24763e+09	3.99523e+09	2.40931e+09	2.79271e+09	2.70349e+09	4.46497e+09	3.15798e+09	1.78267e+09	3.94752e+09	2.62192e+09	3.61887e+09
N-Acetylhistamine	1.82728e+10	3.35452e+10	3.21093e+10	2.83387e+10	2.09032e+10	2.80219e+10	2.42505e+10	2.88406e+10	2.68309e+10	1.08957e+10	2.66944e+10	2.59431e+10	3.76855e+10	2.66784e+10	3.18936e+10	3.2149e+10	8.7629e+09	2.85271e+10	2.48508e+10	2.9847e+10	3.48631e+10	1.84154e+10	1.22363e+10	3.49677e+10	2.56174e+10	1.79393e+10	3.48206e+10	2.56356e+10
N-Acetylornithine	2.46894e+09	7.47863e+09	2.62609e+09	2.74933e+09	2.9075e+09	5.76982e+09	4.55272e+09	4.77768e+09	5.45302e+09	4.74584e+09	2.23531e+09	5.81798e+09	8.08497e+08	8.00257e+09	5.91001e+09	4.32814e+09	2.31635e+09	1.02316e+09	6.37586e+09	1.0427e+09	1.10578e+09	1.19225e+09	8.61702e+08	1.03383e+09	1.10622e+09	3.68069e+09	5.41046e+09	4.90952e+09
N-Acetylvaline	1.93383e+10	1.04021e+10	1.14905e+10	3.99432e+09	8.1701e+09	1.25398e+10	1.43525e+10	4.06564e+09	1.94626e+10	7.46078e+09	1.52106e+10	4.98115e+09	1.29452e+10	1.28542e+10	1.81571e+10	3.72863e+09	7.47719e+09	6.63911e+09	1.82128e+10	1.48426e+10	1.35866e+10	4.2155e+09	8.11327e+09	1.09612e+10	3.7574e+09	1.00883e+10	1.62923e+10	8.7611e+09
N-Arachidonoyl taurine	1.01694e+09	7.80767e+08	1.26103e+09	7.66137e+08	7.06004e+08	7.62805e+08	5.90977e+08	9.02371e+08	9.94169e+08	9.08234e+08	1.91368e+09	1.34734e+09	7.42818e+08	5.80445e+08	1.76683e+08	1.17898e+09	3.42928e+08	3.59004e+08	7.60852e+08	1.06245e+09	6.94579e+08	9.5259e+08	6.81003e+08	9.60562e+08	9.48754e+08	7.75548e+08	1.80555e+08	2.66641e+08
N-Benzyl-3-[(2S,5aS,8aR)-6-(1H-imidazol-2-ylmethyl)-1-methyl-5-oxodecahydropyrrolo[3,2-E][1,4]diazepin-2-yl]propanamide	6.07135e+09	1.81534e+10	8.58352e+09	1.26171e+10	1.00453e+10	4.44075e+09	4.92678e+09	6.95166e+09	8.35388e+09	5.25998e+09	2.0266e+10	1.41654e+10	2.46328e+10	8.48312e+10	3.98804e+10	7.42551e+09	2.76944e+10	1.52707e+10	1.84359e+10	2.76603e+10	4.12476e+10	1.8573e+10	1.28207e+10	1.05678e+10	1.35409e+10	8.59204e+09	8.88727e+09	1.57807e+10
N-Butylbenzenesulfonamide	4.18896e+08	7.66574e+07	5.81931e+07	2.25957e+08	4.61386e+07	5.54701e+07	5.39466e+07	4.18756e+07	1.59737e+08	2.95622e+08	2.09736e+08	6.51407e+07	1.76256e+08	4.75104e+07	7.02902e+07	3.85793e+08	5.20284e+08	1.90799e+08	8.61437e+07	6.26866e+08	6.50598e+07	4.86424e+08	6.33239e+07	2.77455e+08	7.69164e+07	2.86096e+08	4.49724e+08	4.9149e+07
N-Desethyl acetildenafil	7.81564e+08	4.66156e+08	1.01035e+09	2.6561e+08	8.65158e+08	8.37503e+08	6.80291e+08	6.43194e+08	6.50011e+08	7.60473e+08	4.98019e+08	6.57029e+08	1.00608e+09	1.21046e+09	7.5969e+08	9.85263e+08	8.34858e+08	9.03782e+07	8.22968e+07	6.49346e+08	8.60269e+08	9.03908e+08	5.36181e+08	3.7199e+08	3.59178e+08	8.3691e+08	1.01677e+09	7.52967e+08
N-Ethyl-N-methylcathinone	4.76688e+08	5.29554e+08	4.39176e+08	4.47687e+08	4.20955e+08	5.15846e+08	4.19586e+08	4.90041e+08	5.02022e+08	4.69078e+08	4.23101e+08	4.09388e+08	4.17451e+08	5.22079e+08	6.12023e+08	4.6317e+08	4.83064e+08	4.82996e+08	5.27517e+08	4.9831e+08	4.8713e+08	4.65677e+08	4.0096e+08	4.62955e+08	4.83336e+08	5.10674e+08	4.56108e+08	5.37879e+08
N-Ethylpentylone	2.37175e+09	4.49229e+08	2.57185e+09	2.36784e+09	2.49837e+09	2.47288e+09	5.03359e+08	2.25341e+09	2.90027e+09	3.06018e+09	4.45827e+08	4.79725e+08	3.13623e+09	2.27691e+09	1.24667e+09	2.97399e+08	1.10337e+08	1.23955e+09	5.19783e+08	2.50439e+09	1.22941e+09	4.30683e+08	1.58916e+09	3.33615e+09	1.50695e+08	1.98633e+09	2.23834e+09	3.47962e+09
N-Formylmethionine	6.48949e+09	9.47602e+09	4.85537e+09	6.0751e+09	5.37517e+09	1.25071e+10	6.60541e+09	1.07479e+10	1.27803e+10	3.87107e+09	3.23226e+09	4.67164e+09	3.65415e+09	1.61553e+10	1.39228e+10	2.43374e+09	3.9376e+09	1.10948e+09	7.14218e+09	7.78528e+09	5.20258e+09	3.09664e+09	2.74067e+09	3.91126e+09	2.33795e+09	5.43657e+09	5.94758e+09	3.55825e+09
N-Isobutyrylglycine	2.19101e+09	4.99211e+09	2.85707e+09	1.73834e+09	2.39343e+09	5.03756e+09	3.00718e+09	2.1419e+09	4.17561e+09	2.58012e+09	2.43538e+09	2.08775e+09	3.60589e+09	5.87054e+09	6.44948e+09	2.24377e+09	2.28698e+09	3.20996e+09	4.98312e+09	3.62517e+09	2.94658e+09	2.19499e+09	1.84716e+09	3.26896e+09	2.33442e+09	3.75627e+09	3.48874e+09	3.68582e+09
N-Isovalerylglycine	1.8934e+09	2.34904e+09	1.65742e+09	7.70541e+08	2.90393e+09	2.60859e+09	4.17392e+09	1.11683e+09	2.77376e+09	1.31055e+09	5.13216e+08	1.73486e+09	1.46239e+09	1.44707e+09	3.39272e+09	5.37133e+08	1.23209e+09	1.15518e+09	1.66877e+09	1.88361e+09	4.01847e+09	4.56107e+08	2.69036e+09	2.27908e+09	4.35311e+08	3.41085e+09	2.48102e+09	1.36205e+09
N-Methyl-2-pyrrolidone	1.96204e+10	1.57694e+10	2.9728e+10	1.16076e+10	1.29428e+10	1.80343e+10	9.97193e+09	1.571e+10	3.00644e+10	1.67543e+10	2.75578e+10	1.34636e+10	1.78184e+10	1.64871e+10	1.50295e+10	1.72529e+10	1.12754e+10	1.49539e+10	3.85231e+10	1.26884e+10	1.1951e+10	1.83703e+10	1.16584e+10	5.69083e+09	9.42964e+09	9.8475e+09	1.97934e+10	2.12616e+10
N-Methyldioctylamine	2.97827e+08	3.43895e+08	2.39106e+08	2.13465e+08	3.11007e+08	3.25863e+08	2.10937e+08	2.14352e+08	3.04943e+08	1.55797e+08	1.96249e+08	1.51139e+08	2.00123e+08	2.31537e+08	2.8726e+08	2.05539e+08	1.89825e+08	1.60336e+08	2.89154e+08	2.17253e+08	3.09516e+08	1.96564e+08	1.62029e+08	1.6072e+08	2.68186e+08	2.72884e+08	2.05047e+08	2.30495e+08
N-Octyl-2-pyrrolidone	3.36345e+08	3.89493e+08	4.46157e+08	3.38072e+08	2.72418e+08	1.34107e+08	1.95459e+08	2.47531e+08	3.16562e+08	4.23921e+08	2.7032e+08	2.80804e+08	5.03882e+08	3.02219e+08	3.44399e+08	3.65381e+08	3.15285e+08	1.03352e+08	1.47968e+08	3.39016e+08	3.1042e+08	4.0057e+08	3.39821e+08	4.6131e+08	3.16063e+08	3.73696e+08	2.44345e+08	1.45437e+08
N-Oleoyl dopamine	3.29574e+08	1.96705e+08	3.00351e+08	2.47658e+08	1.1876e+08	1.62258e+08	1.41265e+08	1.05471e+08	1.90097e+08	1.98816e+08	3.66102e+08	1.48895e+08	1.72327e+08	8.23703e+07	9.23294e+07	2.35896e+08	1.58469e+08	1.58558e+08	1.17408e+08	1.43454e+08	1.10929e+08	1.83635e+08	1.6583e+08	1.21235e+08	1.34653e+08	2.89476e+08	1.40891e+08	3.24253e+08
N-[3-(2,6-dimethylmorpholino)propyl]-2,3,4,5,6-pentamethylbenzenesulfonamide	2.4805e+08	3.77426e+08	5.37108e+08	4.48031e+08	3.18542e+08	7.15071e+08	3.16661e+08	2.86311e+08	2.00555e+08	9.7573e+08	8.90452e+08	1.13562e+09	5.20928e+08	4.34643e+08	4.23379e+08	6.37597e+08	3.94403e+08	2.32074e+08	1.46063e+09	4.47771e+08	2.60372e+08	3.9551e+08	2.04527e+08	1.21158e+08	3.68146e+08	7.53848e+08	1.81512e+08	1.84661e+08
N-benzyl-N-[2-(benzylsulfanyl)-7-(diethylamino)pyrimido[4,5-d]pyrimidin-4-yl]amine	3.21139e+09	4.36372e+09	4.05985e+09	4.03254e+09	4.10192e+09	3.87495e+09	3.65354e+09	4.12129e+09	4.1669e+09	4.64141e+09	4.5114e+09	3.88326e+09	5.41322e+09	4.46649e+09	1.43238e+09	4.6058e+09	3.90873e+09	1.80447e+09	3.91533e+09	4.6537e+09	5.01662e+09	4.44885e+09	4.23185e+09	2.51109e+09	4.15178e+09	3.94219e+09	3.66284e+09	4.30806e+09
N-butyl-2-methyl-5-(piperidinosulfonyl)-3-furamide	8.5213e+08	1.06623e+09	1.21939e+09	1.00318e+09	6.86034e+08	8.39178e+08	7.41152e+08	7.16808e+08	1.06929e+09	1.42363e+09	1.34785e+09	9.83677e+08	1.78029e+09	1.21747e+09	1.19368e+09	7.7988e+08	1.01267e+09	1.45898e+09	1.03773e+09	1.35437e+09	1.24177e+09	1.00919e+09	1.56503e+09	1.27071e+09	1.16062e+09	1.0511e+09	8.59852e+08	1.15805e+09
N-cyclohexyl-N'-(2-fluorobenzyl)urea	5.2878e+07	2.70072e+07	2.01608e+07	1.9448e+07	6.35915e+07	1.04273e+08	5.71717e+07	5.75244e+07	8.46075e+07	4.77155e+07	1.66614e+07	1.34383e+08	1.0535e+07	4.20203e+07	5.38055e+07	4.99264e+07	1.53942e+07	1.13003e+07	7.72081e+07	1.06624e+07	7.91045e+06	1.06537e+07	1.56766e+07	1.09787e+07	8.65043e+06	1.5797e+08	6.75837e+07	5.34291e+07
N-{(1S,2S,8S,8aS)-8-Hydroxy-1,4a-dimethyl-7-[(2S)-1-oxo-1-(1-piperidinyl)-2-propanyl]decahydro-2-naphthalenyl}methanesulfonamide	1.68958e+09	1.89253e+09	2.16327e+09	1.92552e+09	1.79114e+09	2.08763e+09	1.65124e+09	2.08128e+09	2.28732e+09	2.34293e+09	2.2125e+09	1.86195e+09	3.15279e+09	2.20978e+09	2.34648e+09	2.46137e+09	3.19234e+09	2.79e+09	2.24047e+09	2.98206e+09	1.99143e+09	2.24804e+09	2.09747e+09	4.47747e+09	1.51403e+09	2.28088e+09	2.01092e+09	2.91191e+09
N-{(1S,4S)-4-[1-(3-Chloro-4-methylphenyl)-3,5-dimethyl-1H-pyrazol-4-yl]-2-cyclopenten-1-yl}-2-phenoxyacetamide	5.33137e+09	1.88887e+08	9.41201e+08	6.87182e+07	1.46481e+09	2.40786e+09	7.54427e+07	1.81283e+09	5.85185e+09	5.08005e+09	8.34482e+07	4.02208e+07	2.42133e+09	1.15594e+09	2.98323e+09	1.71423e+08	1.77902e+08	2.69739e+09	1.78788e+08	7.57093e+09	2.30348e+09	1.22456e+08	2.58631e+09	8.03579e+08	6.43888e+07	3.7562e+09	3.59707e+09	5.44368e+08
N-{[(1S,4S,6S)-6-Isopropyl-3-methyl-4-{[5-(1-methyl-1H-imidazol-5-yl)-1,3,4-oxadiazol-2-yl]methyl}-2-cyclohexen-1-yl]methyl}-6-methoxy-3-pyridinamine	8.36067e+08	7.73237e+08	8.1172e+08	7.23202e+08	6.00902e+08	3.56127e+08	3.33161e+08	4.14428e+08	8.74117e+08	8.85769e+08	7.57337e+08	7.20704e+08	5.97965e+08	2.91167e+08	3.56735e+08	2.21463e+08	9.06869e+08	9.05663e+08	1.09609e+09	3.44045e+08	2.72362e+08	1.17142e+09	5.72597e+08	2.61532e+08	3.29974e+08	3.09193e+08	3.42009e+08	4.76787e+08
N-{[(2R,4S,5R)-5-{[Methyl(phenyl)amino]methyl}-1-azabicyclo[2.2.2]oct-2-yl]methyl}-2-thiophenesulfonamide	8.99983e+09	9.92774e+08	1.03858e+09	3.15884e+09	8.40874e+09	9.42216e+09	6.79259e+08	8.64213e+09	9.20173e+09	8.27807e+09	6.83911e+08	1.18562e+08	1.70797e+09	1.32952e+09	8.58445e+09	1.90708e+08	4.47171e+07	6.62838e+09	8.60528e+08	8.78667e+09	6.77159e+09	5.69774e+08	1.71904e+09	7.13846e+08	2.72877e+07	6.95665e+09	7.70379e+09	1.9989e+08
N1,N1-dicyclohexyl-3-(1-naphthyl)acrylamide	4.58087e+09	5.17495e+09	7.35377e+09	5.42638e+09	6.08675e+09	6.06609e+09	4.1011e+09	4.47159e+09	6.94182e+09	7.14929e+09	5.82e+09	6.31355e+09	7.01746e+09	3.57151e+09	3.48767e+09	5.81865e+09	5.2819e+09	4.22985e+09	5.08163e+09	6.61058e+09	1.18197e+10	6.2922e+09	4.32338e+09	6.57088e+09	5.19969e+09	3.68195e+09	3.51504e+09	2.85761e+09
N1,N1-dipropyl-4-(3-azabicyclo[3.2.2]non-3-ylcarbonyl)benzene-1-sulfonamide	6.46407e+09	5.37589e+09	5.09874e+09	9.13598e+09	5.01107e+09	7.52723e+09	5.34603e+09	7.25156e+09	9.04016e+09	7.64999e+09	1.14446e+10	9.01303e+09	8.99434e+09	5.71564e+09	8.62299e+09	8.6799e+09	6.83278e+09	6.99684e+09	8.01675e+09	9.34408e+09	6.15026e+09	7.89619e+09	5.29233e+09	9.20178e+09	1.02306e+10	8.01855e+09	6.36025e+09	8.9357e+09
N1-(1H-1,2,3-benzotriazol-5-yl)-3,4,5-trimethoxybenzamide	8.00499e+07	8.35874e+07	9.01727e+08	3.08719e+08	2.06774e+08	3.50747e+08	3.21404e+08	1.11689e+08	9.72617e+08	1.27501e+09	2.97201e+07	5.7472e+08	6.06838e+07	6.01261e+07	6.52932e+07	1.19085e+08	1.5264e+08	8.62155e+07	3.77109e+08	1.29468e+08	4.07912e+08	2.73489e+08	1.89766e+08	4.87075e+07	7.38092e+07	1.6345e+08	3.41321e+08	1.58036e+09
N1-(2-oxoazepan-3-yl)-N2-(3-pyridylmethyl)ethanediamide	3.22653e+08	3.31045e+08	2.93022e+08	4.55538e+08	3.50344e+08	3.28768e+08	3.43179e+08	4.30552e+08	4.04398e+08	3.45869e+08	3.1212e+08	3.57753e+08	4.80721e+08	3.44203e+08	1.22136e+07	1.5457e+07	3.1481e+08	3.42753e+08	1.27957e+08	3.65421e+08	3.40469e+08	2.66309e+08	4.55629e+08	4.01174e+08	2.41819e+08	3.07678e+08	3.8418e+08	3.58837e+08
N1-(2-{2-[2-(acetylamino)phenoxy]ethoxy}phenyl)acetamide	2.45389e+08	4.19986e+08	2.44648e+08	6.84784e+08	1.99654e+09	5.83693e+08	5.05497e+08	9.08478e+08	1.3538e+09	5.96856e+08	4.51384e+08	9.13763e+08	2.52675e+08	4.59509e+08	5.92983e+08	5.26136e+08	6.79526e+08	1.57352e+09	1.71228e+08	1.43028e+08	7.17206e+08	3.90879e+08	2.84998e+08	2.43666e+08	3.38421e+08	1.03197e+09	8.14111e+08	3.86942e+08
N1-(3-pyridyl)-2,3,4,5,6-pentamethylbenzene-1-sulfonamide	8.61633e+08	8.52116e+08	9.55183e+08	8.75165e+08	7.79461e+08	8.64658e+08	8.21004e+08	9.25269e+08	1.10563e+09	1.25567e+09	1.4294e+09	1.16185e+09	1.59374e+09	1.3419e+09	7.23683e+08	9.61716e+08	8.98359e+08	7.96208e+08	9.09843e+08	1.56118e+09	7.83132e+08	1.02021e+09	9.37087e+08	1.63725e+09	9.56156e+08	1.16809e+09	1.10294e+09	1.98676e+09
N1-[4-(1,3-Oxazol-5-yl)phenyl]cyclopropane-1-carboxamide	1.83787e+09	3.27079e+09	2.57211e+09	2.06442e+09	2.82652e+09	2.74335e+09	2.68693e+09	3.42201e+09	3.89882e+09	3.50994e+09	2.16513e+09	3.81569e+09	2.40255e+09	2.81641e+09	2.21966e+09	2.93909e+09	1.82588e+09	2.97471e+09	3.38317e+09	2.16606e+09	2.4021e+09	2.65274e+09	2.53344e+09	2.23573e+09	1.80877e+09	2.42272e+09	3.63903e+09	2.97951e+09
N1-[4-(trifluoromethyl)phenyl]-2-phenylbutanamide	2.46682e+09	4.46892e+08	2.64349e+08	6.43176e+08	3.16918e+09	3.16517e+09	2.6732e+09	3.22811e+09	2.39816e+09	3.92353e+09	3.27946e+08	8.33026e+09	5.47484e+08	3.54074e+08	2.38044e+09	4.9337e+08	1.64922e+09	1.41031e+09	6.83985e+09	4.32204e+09	5.3077e+08	7.28908e+08	2.19353e+09	3.66385e+09	2.88566e+08	3.10389e+09	4.23723e+09	1.05799e+10
N1-[5-(tert-butyl)-3-methyl-3,6-dihydro-2H-1,3,4-thiadiazin-2-yliden]-4-methoxyaniline	1.47633e+09	1.60266e+08	3.52017e+08	2.64052e+09	4.35319e+08	6.45249e+08	6.56067e+08	9.47447e+08	1.82694e+09	1.39923e+09	9.75723e+07	1.25541e+09	1.8021e+09	9.1557e+08	1.02541e+09	8.12654e+08	7.35321e+08	3.54206e+08	1.16025e+09	1.13903e+09	1.69153e+09	8.12125e+08	4.16112e+08	5.15209e+09	6.99426e+08	1.1441e+09	9.22479e+08	1.2782e+09
N1-{4-methyl-2-[(3,4,5-trimethoxybenzylidene)amino]phenyl}acetamide	1.54177e+08	1.22958e+08	1.46854e+08	1.39956e+08	1.37642e+08	1.63906e+08	7.75571e+07	1.79966e+08	2.72826e+08	4.56782e+08	6.6656e+07	3.14906e+07	2.42194e+08	1.57096e+08	9.97412e+07	4.21932e+07	3.44947e+07	8.34497e+07	2.42429e+08	2.11697e+08	1.15869e+08	3.84755e+07	1.75556e+08	1.43786e+08	4.99779e+07	2.61113e+08	2.16336e+08	2.20775e+08
N2-ethyl-N4-isopropyl-6-(methylthio)-1,3,5-triazine-2,4-diamine	4.3804e+09	4.52998e+09	4.23394e+09	3.76985e+09	3.67368e+09	4.77977e+09	3.90667e+09	4.76404e+09	4.5479e+09	4.38765e+09	3.95582e+09	3.76065e+09	3.83242e+09	5.07948e+09	5.63977e+09	4.14604e+09	4.30296e+09	4.4309e+09	5.12028e+09	4.62029e+09	4.42364e+09	4.8132e+09	3.84313e+09	4.01256e+09	4.64016e+09	4.52448e+09	4.35104e+09	5.55112e+09
N3,N4-Dimethyl-L-arginine	9.37191e+09	5.35869e+09	1.2728e+10	4.9216e+09	9.02096e+09	9.5881e+09	1.309e+10	1.53908e+10	1.37336e+10	1.27236e+10	5.89825e+09	7.6877e+09	4.72363e+09	5.85418e+09	6.06906e+09	6.97012e+09	5.40933e+09	4.55709e+09	3.80802e+09	4.26255e+09	7.52972e+09	4.85518e+09	7.31517e+09	4.12914e+09	6.36161e+09	9.40383e+09	1.03545e+10	7.87643e+09
N4-Acetylsulfadiazine	1.97731e+08	3.8668e+08	2.51004e+08	3.43358e+08	1.97159e+08	2.8328e+08	3.86424e+08	2.94809e+08	2.35472e+08	9.29784e+08	1.03147e+09	7.64024e+08	1.47206e+09	5.46287e+08	3.93815e+08	3.36679e+08	5.16679e+08	5.77348e+08	4.54547e+08	7.81433e+08	2.46028e+08	6.87305e+08	2.22897e+08	9.83384e+08	2.64455e+08	9.21123e+08	4.22923e+08	1.634e+09
N6-Cyclopropyl-3-[4-(trifluoromethyl)phenyl][1,2,4]triazolo[4,3-b]pyridazin-6-amine	2.0588e+10	7.27696e+09	1.06839e+10	1.99225e+10	5.13642e+09	7.18505e+09	1.12683e+10	9.72718e+09	1.02698e+10	2.30185e+10	1.69808e+10	1.92844e+10	4.10002e+09	1.20635e+10	1.99769e+10	3.22518e+10	1.50292e+10	3.12596e+09	2.41992e+10	5.16828e+09	3.31016e+09	7.89753e+09	1.86847e+10	6.13133e+09	5.81055e+09	2.43599e+10	7.44402e+09	9.05347e+09
N6-Me-dA	3.45376e+09	6.05852e+09	1.77811e+09	4.69024e+09	2.59473e+09	1.84774e+09	3.10107e+09	1.87318e+09	1.4882e+09	7.48201e+09	5.13946e+09	6.84881e+08	7.14624e+08	4.36545e+08	7.69599e+08	1.63819e+09	6.30729e+09	2.67951e+09	2.52668e+09	3.69546e+08	2.35908e+09	2.69059e+08	5.35041e+08	2.13216e+08	3.27978e+09	3.16242e+09	3.67795e+08	7.97463e+08
N6-Methyladenine	5.92738e+09	6.98687e+09	5.3154e+09	7.64162e+09	5.90325e+09	4.86793e+09	5.30583e+09	3.53353e+09	2.84594e+09	6.88778e+09	6.21991e+09	2.04348e+09	1.77953e+09	6.2313e+09	2.79586e+09	5.92237e+09	7.38153e+09	5.6398e+09	4.02347e+09	8.14589e+08	6.78371e+09	6.45699e+08	1.17302e+09	7.60763e+08	4.3844e+09	3.99778e+09	1.3604e+09	2.91504e+09
Nandrolone glucuronide	3.53721e+09	2.98954e+09	4.63066e+09	2.89245e+09	4.01424e+09	3.87427e+09	8.90182e+08	2.79013e+09	3.64161e+09	2.98675e+09	4.15956e+09	3.32954e+09	3.85806e+09	5.02196e+09	1.55658e+09	4.04225e+09	9.02838e+08	5.4382e+09	2.84653e+09	3.86131e+09	3.13345e+09	4.97361e+09	3.07277e+09	1.93686e+09	4.08114e+09	4.58436e+09	4.61743e+09	6.04294e+09
Naringenin	1.82463e+09	1.67543e+10	3.00919e+08	3.93479e+08	1.666e+10	2.93751e+10	2.9232e+10	9.60905e+08	3.92508e+08	1.25423e+09	1.28628e+10	2.79963e+08	5.02933e+08	1.3037e+09	2.51591e+09	8.99045e+08	2.83754e+09	1.32466e+10	7.98134e+08	2.86403e+09	1.4639e+10	2.58314e+10	1.01522e+10	9.03937e+07	3.01079e+08	1.13248e+10	1.22402e+10	4.47624e+08
Neosaxitoxin	1.06384e+10	1.61118e+09	1.06228e+10	3.84993e+09	5.50223e+09	9.82226e+08	1.14325e+10	1.09628e+10	1.03824e+10	1.93018e+10	1.43019e+10	7.18573e+09	1.17042e+10	6.71248e+09	5.06362e+09	1.52029e+10	8.25766e+09	3.58701e+09	1.42085e+10	6.45402e+09	5.61105e+09	1.5082e+10	1.86864e+10	7.05435e+09	3.63305e+09	4.74308e+09	1.66848e+09	1.511e+09
Nicotinamide 1-oxide	1.73182e+10	8.3679e+09	1.1825e+10	5.34867e+09	3.88176e+09	8.08778e+09	7.30963e+09	7.47736e+09	7.88777e+09	4.50601e+09	5.61218e+09	3.68784e+09	4.02549e+09	3.45585e+10	5.2063e+09	6.97539e+09	6.32122e+09	2.05197e+09	9.49747e+09	1.23471e+10	1.80829e+09	1.7511e+10	3.45231e+09	2.17989e+09	1.54507e+10	1.07227e+10	1.03951e+10	1.03268e+10
Nicotinic acid	1.80361e+10	1.85297e+10	1.92101e+10	2.22664e+10	2.32558e+10	2.42758e+10	2.3661e+10	2.68007e+10	2.49389e+10	2.78197e+10	1.88687e+10	2.64201e+10	2.63506e+10	2.75642e+10	2.89038e+10	2.52324e+10	2.29009e+10	2.78155e+10	3.39164e+10	2.12744e+10	2.99853e+10	2.67269e+10	1.72019e+10	2.48592e+10	1.74839e+10	2.36565e+10	2.17739e+10	2.61947e+10
Nicotinyl alcohol	7.14347e+08	7.91049e+08	2.41236e+09	7.55165e+08	7.5908e+08	7.73314e+08	6.72766e+08	7.48981e+08	9.0962e+08	7.80753e+08	2.52391e+09	8.22447e+08	7.0628e+08	9.19247e+08	9.29888e+08	7.86851e+08	6.8369e+08	7.12723e+08	7.85606e+08	2.52606e+09	6.8854e+08	7.01459e+08	1.90684e+09	2.20677e+09	6.60751e+08	6.64369e+08	7.22414e+08	8.46243e+08
Nipecotic acid	5.18398e+10	5.35088e+10	4.72954e+10	8.0361e+10	4.00246e+10	3.00838e+10	3.98842e+10	3.54664e+10	5.20551e+10	3.71216e+10	3.78578e+10	5.06018e+10	2.35586e+10	8.82437e+10	6.26841e+10	8.80974e+10	2.94434e+10	2.36882e+10	5.91621e+10	1.81142e+10	1.91503e+10	2.16828e+10	2.60474e+10	1.88276e+10	2.03812e+10	5.41164e+10	4.84096e+10	6.52384e+10
Nootkatone	1.167e+09	3.75511e+09	5.68163e+09	4.11789e+09	4.17511e+09	3.66455e+09	3.43248e+09	4.15221e+09	2.01369e+09	4.69519e+09	3.48877e+09	4.37801e+09	4.26551e+09	3.45201e+09	3.33028e+09	5.68348e+09	3.00327e+09	3.52471e+09	3.50393e+09	3.83352e+09	3.40583e+09	4.04518e+09	3.8158e+09	3.99526e+09	3.82293e+09	3.7207e+09	3.75627e+09	4.53867e+09
Noracetildenafil	7.74675e+08	4.93875e+08	9.80069e+08	5.47466e+08	7.91429e+08	5.44975e+08	4.76967e+08	4.86959e+08	5.54428e+08	8.10676e+08	9.78249e+08	7.82915e+08	1.42403e+09	6.52703e+08	5.92943e+08	8.9641e+08	7.13507e+08	5.17263e+08	8.05757e+08	6.81123e+08	7.51726e+08	7.65675e+08	5.61636e+08	8.68473e+08	5.548e+08	5.78085e+08	7.14106e+08	3.22239e+08
O-Arachidonoyl ethanolamine	4.24039e+09	1.00175e+09	1.77714e+09	1.46383e+09	1.87188e+09	3.59505e+09	1.0714e+09	5.76756e+09	6.38599e+09	1.92956e+09	1.24974e+09	1.47656e+09	3.26345e+09	7.43355e+08	7.88568e+08	1.57781e+09	2.54726e+09	2.15292e+09	1.1793e+09	9.2261e+07	3.87748e+09	9.75186e+07	3.28837e+09	1.09372e+09	9.88135e+08	1.20847e+09	9.18432e+08	7.09844e+08
Octadecanamine	1.89136e+09	2.20705e+09	2.43588e+09	2.76317e+09	2.7335e+09	2.67163e+09	2.18674e+09	2.58614e+09	2.24219e+09	2.6265e+09	2.43732e+09	2.84002e+09	2.83842e+09	1.5921e+09	2.85072e+09	2.73598e+09	2.11973e+09	2.51529e+09	2.44773e+09	2.29541e+09	2.57315e+09	2.19756e+09	1.81325e+09	2.51513e+09	1.76442e+09	1.98027e+09	2.28741e+09	1.84499e+09
Octyl hydrogen phthalate	7.56727e+09	7.4566e+09	7.2079e+09	6.42254e+09	6.00691e+09	7.59468e+09	6.1243e+09	7.89982e+09	7.70494e+09	7.79041e+09	7.0309e+09	5.98837e+09	6.25065e+09	9.051e+09	8.05739e+09	7.44877e+09	6.98536e+09	7.02523e+09	8.64651e+09	7.06353e+09	7.41138e+09	7.63525e+09	7.34026e+09	7.10358e+09	7.81396e+09	7.54747e+09	8.34174e+09	8.92092e+09
Oleamide	1.26634e+09	9.92177e+08	1.66957e+09	1.49013e+09	1.22617e+09	1.54274e+09	1.0252e+09	1.26549e+09	1.13982e+09	9.86656e+08	1.17239e+09	1.50692e+09	1.06464e+09	9.09792e+08	7.54975e+08	1.43553e+09	1.13166e+09	1.23981e+09	1.27607e+09	1.30699e+09	1.41006e+09	1.36381e+09	1.38833e+09	1.31661e+09	1.86377e+09	1.17768e+09	8.20682e+08	1.02215e+09
Oleanolic acid	6.20371e+08	2.48944e+09	4.3458e+07	3.67559e+08	4.25929e+08	1.27725e+08	4.02368e+08	2.59197e+08	1.73929e+08	4.57125e+07	9.04284e+07	1.50079e+08	1.47426e+09	2.19675e+07	2.77439e+07	8.82073e+07	1.90993e+08	2.67587e+09	9.6717e+07	6.92152e+07	1.02146e+08	4.1036e+08	9.69545e+07	4.19257e+07	6.41068e+07	2.17972e+09	5.33675e+07	1.41291e+07
Oleoyl ethanolamide	8.16903e+09	2.52155e+09	4.14625e+09	3.55008e+09	3.66092e+09	7.97436e+09	2.34202e+09	1.15974e+10	1.29968e+10	4.74992e+09	2.38487e+09	3.2275e+09	6.30261e+09	1.75982e+09	1.66e+09	3.61309e+09	4.5407e+09	5.10086e+09	2.31999e+09	6.59375e+09	7.21897e+09	7.04082e+09	5.85993e+09	2.607e+09	2.24994e+09	2.98889e+09	2.08744e+09	1.8357e+09
Oleoyl-L-lysophosphatidic acid	2.17824e+08	7.52624e+08	4.48455e+08	6.83273e+08	4.17792e+08	7.26636e+08	4.74475e+08	8.49673e+08	2.69261e+08	8.52179e+08	4.47898e+08	2.5527e+08	1.00254e+09	8.43861e+07	1.07081e+09	3.97571e+08	9.53289e+08	2.13222e+09	5.39701e+08	6.40055e+08	1.61743e+09	6.66522e+08	7.4033e+08	5.09348e+08	4.07645e+08	2.45691e+08	4.40594e+08	4.71952e+08
Orbencarb	1.59957e+08	1.38055e+08	6.27307e+07	1.04969e+08	2.78901e+08	2.11549e+08	1.26486e+08	2.7831e+08	8.0174e+08	6.69164e+08	1.29405e+08	6.16748e+07	8.72136e+07	1.54082e+08	4.07693e+07	2.74193e+08	2.68732e+08	1.45365e+08	8.89327e+07	7.64136e+07	3.14442e+08	7.08672e+07	8.27537e+08	1.11029e+08	2.21167e+07	2.26198e+08	8.46212e+07	3.31915e+07
Ornithine	8.73277e+09	7.10713e+09	5.81803e+08	4.4531e+09	9.14902e+08	1.55735e+09	4.47077e+09	5.76768e+09	6.40519e+09	9.15856e+08	4.60318e+09	6.26734e+09	2.01468e+09	7.58498e+09	7.3758e+09	6.86149e+09	2.39075e+09	1.18515e+09	7.02629e+09	1.57456e+09	1.31176e+09	1.58898e+09	2.1877e+09	1.70788e+09	2.28991e+09	7.309e+09	3.59784e+09	1.92359e+09
Oxohongdenafil	1.01779e+09	8.07935e+08	8.63303e+08	1.00723e+09	7.74002e+08	8.73645e+08	1.13108e+09	1.09607e+09	7.76382e+08	8.07367e+08	1.12825e+09	1.12293e+09	1.14693e+09	6.18238e+08	1.10245e+09	1.00571e+09	5.23157e+08	6.03465e+08	6.28833e+08	6.75257e+08	6.08376e+08	6.53161e+08	7.07881e+08	1.09692e+09	1.27688e+09	8.09792e+08	9.105e+08	7.45065e+08
Oxomemazine	7.42404e+08	6.72503e+08	9.06405e+08	3.92301e+08	1.33256e+08	6.62166e+07	4.07082e+08	2.76085e+08	5.27454e+08	3.43813e+08	3.08326e+08	3.72367e+08	1.80591e+08	3.47915e+08	2.34108e+08	3.66687e+08	4.0919e+08	1.71435e+08	6.73052e+08	2.70213e+08	3.84146e+08	2.1881e+08	4.34256e+08	1.71053e+08	1.64815e+08	1.58951e+08	1.60588e+08	1.52833e+08
Oxprenolol	6.96527e+08	9.65441e+08	8.82992e+08	8.63408e+08	6.71145e+08	7.23779e+08	6.77975e+08	8.19762e+08	8.93966e+08	9.11719e+08	8.28123e+08	8.27041e+08	1.14202e+09	7.82711e+08	8.46619e+08	1.16999e+09	5.81429e+08	9.44434e+08	5.59935e+08	9.53679e+08	9.79456e+08	8.0893e+08	8.59981e+08	1.01459e+09	9.35901e+08	5.76253e+08	8.89195e+08	1.00771e+09
PD 0200347	1.95282e+08	1.54329e+09	1.4593e+09	1.36078e+09	1.35576e+09	6.30495e+08	1.29848e+09	2.00664e+09	2.0741e+09	2.37998e+09	2.97147e+09	2.30304e+09	1.8731e+10	1.45545e+10	1.89795e+09	1.77113e+10	1.01688e+09	1.18801e+09	2.71055e+09	1.32005e+09	4.92854e+08	1.45273e+09	7.48122e+08	1.50636e+09	1.481e+09	6.29187e+08	1.60902e+09	1.92906e+09
PEG Monolaurate n4	1.68958e+09	2.01871e+09	2.28356e+09	1.98866e+09	1.79114e+09	2.08763e+09	1.65124e+09	3.11857e+09	3.69406e+09	2.34293e+09	1.52526e+09	4.11418e+09	5.31612e+09	3.79293e+09	1.15264e+09	4.24643e+09	3.19234e+09	4.56078e+09	3.54659e+09	4.43317e+09	3.55402e+09	2.24804e+09	3.751e+09	4.47747e+09	2.74588e+09	3.75417e+09	1.97685e+09	2.91191e+09
PLK	2.07688e+09	2.11978e+10	1.43879e+10	4.31744e+09	1.14077e+10	1.31333e+09	1.72258e+10	3.7523e+09	2.49082e+10	2.31126e+09	1.66356e+09	3.3052e+09	3.78945e+08	5.70109e+09	2.14137e+09	5.9741e+09	6.08838e+08	1.11104e+09	4.44765e+09	3.36981e+08	3.74935e+08	5.25469e+09	5.95938e+08	2.71629e+08	3.97465e+09	3.2954e+09	1.1264e+09	2.41555e+09
PNK	1.23444e+07	2.40743e+07	5.12378e+07	1.79674e+07	2.03281e+07	1.23048e+07	1.04498e+07	1.56372e+07	1.02863e+07	2.51205e+07	1.19852e+07	1.43379e+07	7.76213e+07	1.2955e+07	3.14029e+07	1.59518e+07	9.19457e+06	2.15666e+07	1.47438e+07	1.59689e+07	9.27135e+06	1.26666e+07	4.34472e+07	1.75031e+07	8.82439e+06	1.85092e+07	2.52342e+07	1.18808e+07
PPG Acrylate n5	9.74899e+09	1.02965e+10	1.25044e+10	1.02652e+10	8.43442e+09	9.1073e+09	8.18487e+09	9.90125e+09	1.19762e+10	1.28441e+10	1.0483e+10	9.06576e+09	1.34911e+10	1.16337e+10	9.17347e+09	1.09623e+10	1.0131e+10	9.36255e+09	9.46014e+09	1.31049e+10	9.02452e+09	9.46471e+09	1.09093e+10	1.17414e+10	1.4328e+10	1.11332e+10	1.17058e+10	1.37101e+10
PQH	3.7232e+09	4.12019e+09	2.56295e+09	6.38647e+09	3.91031e+09	3.92313e+09	3.87849e+09	4.21892e+09	1.91968e+09	4.54465e+09	4.95243e+09	4.16366e+09	5.37225e+09	5.0531e+09	5.31374e+09	4.44946e+09	4.17924e+09	4.3592e+09	9.72767e+08	4.28239e+09	4.04241e+09	3.46535e+09	3.97178e+09	4.56165e+09	4.17442e+09	4.32513e+09	4.77184e+09	5.24021e+09
PTI-1	6.08706e+08	7.79e+08	8.8979e+08	8.61166e+08	5.84595e+08	5.80691e+08	6.50269e+08	8.6851e+08	5.62803e+08	1.01865e+09	3.16554e+09	8.66954e+08	1.87175e+09	2.06524e+09	1.56806e+09	8.63338e+08	1.19956e+09	1.18906e+09	1.51404e+09	1.5508e+09	1.44788e+09	1.44716e+09	9.89346e+08	1.77058e+09	1.60243e+09	1.8891e+09	9.36891e+08	2.201e+09
Palmitelaidic acid methyl ester	1.25486e+08	1.8357e+08	1.11848e+08	2.05224e+08	1.59092e+08	1.5324e+08	6.72658e+07	1.94279e+08	1.97713e+08	1.80887e+08	1.29657e+08	1.76652e+08	1.39126e+08	1.98819e+08	2.16231e+08	1.21622e+08	1.81343e+08	1.52582e+08	2.27107e+08	2.10233e+08	1.78162e+08	1.8813e+08	2.23259e+08	9.03511e+07	3.59584e+08	1.73449e+08	2.09193e+08	2.18374e+08
Palmitoleic acid	1.12868e+10	2.2482e+10	1.22002e+10	1.30412e+10	1.55303e+10	1.78887e+10	1.57082e+10	1.46288e+10	1.91375e+10	1.57395e+10	1.50762e+10	1.21077e+10	1.90956e+10	1.963e+10	2.13986e+10	1.90886e+10	1.6286e+10	2.12297e+10	1.864e+10	1.5185e+10	2.12635e+10	1.67746e+10	1.50508e+10	1.46316e+10	1.06652e+10	1.27106e+10	1.63214e+10	2.15101e+10
Palmitoyl ethanolamide	5.4018e+09	1.62252e+09	2.0281e+09	2.50026e+09	2.63512e+09	3.98643e+09	2.19438e+09	9.27067e+09	5.17217e+09	3.0781e+09	1.83338e+09	2.42966e+09	4.09305e+09	1.37079e+09	1.06208e+09	2.45462e+09	3.39753e+09	3.60543e+09	1.47014e+09	3.06658e+09	7.50537e+09	4.03764e+09	4.23234e+09	1.89833e+09	1.82144e+09	2.33282e+09	1.92586e+09	1.22571e+09
Palmitoylcarnitine	3.3881e+09	1.60577e+09	5.21664e+09	2.54293e+09	2.76859e+09	8.16016e+09	8.92844e+08	3.29855e+09	1.56611e+10	2.03553e+09	1.19404e+09	3.79339e+09	1.90363e+09	2.20963e+09	5.38642e+08	8.0249e+08	6.04655e+08	6.16849e+08	8.13774e+08	1.59327e+09	3.62568e+09	1.75245e+09	2.93894e+09	2.28151e+09	2.663e+09	1.85316e+09	1.30308e+09	8.98203e+08
Pantothenic acid	5.96682e+10	5.45141e+10	3.33037e+10	6.33668e+09	5.17796e+10	5.63862e+10	5.69581e+10	6.89946e+10	6.14747e+10	3.78957e+10	4.46323e+10	7.3579e+10	3.06168e+10	6.88007e+10	7.52171e+10	5.58633e+10	4.13229e+10	3.95658e+10	5.42848e+10	3.96707e+10	5.64201e+10	3.43023e+10	5.54305e+09	5.57031e+10	3.45011e+10	6.44137e+10	5.91918e+10	5.89742e+10
Penbutolol	1.07387e+09	9.31952e+08	9.59186e+08	1.08359e+09	1.01064e+09	1.01621e+09	9.70914e+08	1.25744e+09	1.68857e+09	9.31709e+08	9.54134e+08	9.82603e+08	6.51861e+08	8.05455e+08	7.7304e+08	1.03751e+09	4.64401e+08	7.98776e+08	8.53326e+08	8.34985e+08	7.91654e+08	7.56635e+08	9.40366e+08	8.82263e+08	7.76032e+08	1.0273e+09	1.32398e+09	9.35758e+08
Pentadecanoic acid	3.45431e+09	4.01456e+09	3.65231e+09	4.08528e+09	5.05236e+09	3.67523e+09	4.06488e+09	3.79291e+09	2.3411e+09	8.62194e+09	5.51082e+09	7.37684e+09	8.38618e+09	5.7077e+09	9.55765e+09	8.0987e+09	1.34782e+10	1.09096e+10	5.00768e+09	8.72912e+09	9.8807e+09	1.19217e+10	7.48666e+09	7.82267e+09	8.40184e+09	8.1305e+09	3.78373e+09	1.11286e+10
Perindopril	9.04187e+08	5.4534e+08	4.80684e+08	5.79439e+08	6.73739e+08	3.66904e+08	6.78957e+08	9.00446e+08	4.51972e+08	1.30071e+09	1.30205e+09	8.49765e+08	9.63753e+08	9.2331e+08	8.10895e+08	1.05591e+09	9.82995e+08	1.05423e+09	8.96786e+08	1.24154e+09	8.08115e+08	8.77251e+08	8.38208e+08	7.99234e+08	4.27791e+08	2.12322e+08	8.45598e+08	4.5403e+08
Phenacetin	2.31159e+09	5.00112e+08	5.77439e+08	5.9291e+08	6.11239e+08	5.63554e+08	3.11726e+08	1.30317e+09	7.26193e+08	5.64868e+08	5.90178e+08	6.05446e+08	5.8281e+08	5.12699e+08	1.1766e+09	2.51668e+09	4.25816e+08	5.66205e+08	2.04114e+08	5.31412e+08	4.73725e+08	7.14093e+08	4.33708e+08	3.41799e+08	1.26418e+09	1.10613e+09	1.71234e+09	1.09656e+09
Phendimetrazine	2.11656e+08	3.87935e+08	2.66243e+08	1.50566e+08	3.37034e+08	2.49164e+08	8.07266e+07	2.1046e+08	2.03146e+08	3.18134e+08	1.00145e+08	5.43013e+07	2.84471e+08	1.49801e+08	3.29356e+08	8.68227e+07	8.88531e+07	2.32819e+08	3.97596e+08	3.70482e+08	2.04232e+08	1.2894e+08	2.1487e+08	2.81702e+08	8.09113e+07	2.94359e+08	2.98089e+08	2.62595e+08
Phenol	1.56336e+09	7.31997e+08	7.21436e+08	1.68536e+09	9.63404e+08	1.00241e+09	3.95111e+08	7.79791e+08	6.45288e+08	1.05848e+09	9.88202e+08	1.0606e+09	9.16174e+08	1.4032e+09	1.41638e+09	7.31324e+08	8.96251e+08	1.75865e+09	6.27927e+08	5.77338e+08	2.04301e+09	6.63503e+08	3.80827e+08	1.1674e+09	8.53765e+08	1.14999e+09	3.89274e+08	3.79969e+09
Phenylacetaldehyde	1.15933e+10	1.23359e+10	9.55686e+08	2.48217e+10	4.36919e+09	8.46512e+09	3.07504e+09	1.49394e+10	3.10721e+09	4.26782e+10	1.73814e+10	2.07279e+10	4.51098e+10	1.43259e+10	3.30873e+10	3.13017e+10	1.79868e+10	3.12307e+10	3.66089e+10	2.40677e+10	2.14446e+10	1.88228e+10	1.22638e+10	3.00915e+10	1.21401e+10	1.21435e+10	2.84018e+09	1.53323e+10
Phenylglyoxylic acid	5.22141e+09	5.87674e+09	6.16842e+09	5.86694e+09	2.40714e+09	2.20442e+09	2.46145e+09	3.97477e+09	3.48436e+09	4.57975e+09	1.89827e+09	2.31543e+09	5.6008e+09	3.31099e+09	6.461e+09	3.7729e+09	5.36685e+09	2.49161e+09	4.95954e+09	4.64012e+09	5.35281e+09	3.01183e+09	5.31481e+09	4.54883e+09	5.05048e+09	4.12684e+09	3.05972e+09	6.53257e+09
Phenylpyruvic acid	2.20054e+10	3.90737e+10	1.80958e+10	1.16582e+10	1.92698e+10	1.8728e+10	1.99911e+10	3.1403e+10	4.03676e+10	2.39315e+10	3.53404e+10	2.55906e+10	3.01412e+10	4.18795e+10	5.4472e+10	3.20461e+10	3.40238e+10	8.30767e+09	3.35997e+10	2.72943e+10	3.08749e+10	1.72804e+10	1.95482e+10	3.62614e+10	2.95283e+10	2.89067e+10	3.21758e+10	3.25595e+10
Phloroglucinol	9.37819e+09	9.22365e+09	1.02288e+10	5.7607e+09	7.90286e+09	8.22887e+09	6.08966e+09	3.11921e+09	6.00985e+09	1.16303e+10	8.58847e+09	5.90873e+09	1.25666e+10	1.07653e+10	6.92343e+09	2.83583e+09	1.11979e+10	1.28887e+10	9.15042e+09	1.06136e+10	1.21098e+10	1.02583e+10	8.93737e+09	5.44732e+09	8.24942e+09	7.95539e+09	4.55298e+09	1.00761e+10
Pipecolic acid	3.53855e+10	3.78454e+10	3.1671e+10	3.29821e+10	2.23039e+10	2.60143e+10	2.4789e+10	2.74191e+10	3.59466e+10	1.75497e+10	1.80032e+10	2.58971e+10	6.64074e+09	3.0704e+10	4.17483e+10	3.00452e+10	1.07699e+10	6.34206e+09	3.60014e+10	6.45212e+09	6.05424e+09	6.91312e+09	8.2118e+09	6.96582e+09	7.81403e+09	3.15745e+10	2.84448e+10	3.01753e+10
Pipenzolate	2.97094e+07	1.91262e+07	1.6243e+07	2.06351e+07	6.34236e+07	1.88794e+08	3.90527e+07	9.94247e+07	1.55729e+07	4.76209e+07	3.17823e+07	2.96689e+07	1.61618e+07	2.81581e+07	1.95588e+07	2.9782e+07	1.16254e+07	1.3209e+07	1.68552e+07	1.31596e+07	1.13604e+07	1.19475e+07	1.3119e+07	2.16045e+07	1.45173e+07	1.4751e+07	1.77054e+07	2.53316e+07
Pirbuterol	3.77109e+09	2.89013e+08	2.13701e+08	3.00529e+08	3.22842e+08	1.68283e+08	3.17754e+08	7.76554e+08	1.85245e+09	3.13064e+08	7.86612e+08	4.66116e+08	3.92006e+08	2.55279e+08	1.53822e+08	2.70144e+08	1.94363e+08	3.42672e+08	2.94863e+08	2.52908e+08	2.4096e+08	3.01373e+08	2.71545e+08	6.49423e+09	1.68679e+08	6.07594e+09	1.71631e+08	1.876e+08
Porphobilinogen	1.50457e+09	2.57114e+09	1.29174e+09	9.89667e+08	1.45882e+09	2.16147e+09	1.30257e+09	2.37905e+09	1.58802e+09	1.42034e+09	1.76989e+09	2.23194e+09	1.41502e+09	2.11781e+09	3.17874e+09	5.10617e+08	1.98039e+09	1.76989e+09	6.16706e+08	2.01926e+09	6.46574e+08	9.36302e+08	9.42034e+08	2.23633e+09	1.3787e+09	2.09688e+09	1.458e+09	2.59299e+09
Prolinamide	3.01756e+09	1.27327e+10	1.13685e+10	1.42018e+10	1.07503e+10	6.90708e+09	1.10147e+10	1.19467e+10	1.02518e+10	1.77723e+10	6.48747e+09	1.27735e+10	5.95479e+09	7.86594e+09	1.06471e+10	1.73015e+10	1.66441e+09	1.45255e+10	5.37831e+09	8.69898e+09	4.83899e+09	1.61854e+10	5.14646e+09	1.37127e+09	4.84028e+09	8.74888e+09	1.10041e+10	8.73644e+09
Proline	6.21316e+10	6.86743e+10	3.94719e+10	5.02704e+10	4.58131e+10	4.83154e+10	3.72084e+10	4.09053e+10	7.02435e+10	5.32201e+10	3.90628e+10	5.52532e+10	2.16599e+10	4.51523e+10	7.2881e+10	3.88966e+10	2.687e+10	2.52537e+10	6.51978e+10	2.31466e+10	2.15313e+10	2.07113e+10	2.11515e+10	2.2987e+10	2.17828e+10	6.34324e+10	4.60959e+10	4.39288e+10
Propachlor ESA	2.50297e+08	2.18389e+08	2.56518e+08	2.80518e+08	1.61324e+08	2.40556e+08	1.62764e+08	3.06227e+08	2.87739e+08	2.75756e+08	2.49356e+08	3.42186e+08	5.53571e+07	1.90173e+08	1.87196e+08	3.30206e+08	1.2419e+08	1.87244e+08	3.37877e+08	2.23042e+08	2.68678e+08	2.19465e+08	1.45902e+08	1.99065e+08	9.94924e+07	1.27589e+08	4.92831e+07	3.04131e+08
Protocatechuic acid	1.79431e+09	2.37882e+09	1.00311e+09	1.12045e+09	2.06742e+09	3.90324e+09	1.84734e+09	2.03594e+09	2.28621e+09	1.87153e+09	1.62398e+09	1.57894e+09	1.52366e+09	1.94071e+09	1.91967e+09	2.22566e+09	1.33344e+09	3.21745e+09	2.05148e+09	1.23884e+09	2.97514e+09	1.73526e+09	6.19281e+08	6.59531e+08	1.5953e+09	1.80397e+09	1.29367e+09	1.46684e+09
Purine	7.87269e+08	6.40481e+08	2.76795e+08	2.41929e+08	1.75673e+09	1.56733e+09	1.78299e+09	2.55271e+09	1.51584e+09	2.44179e+09	1.06256e+09	4.04054e+09	1.051e+09	1.26267e+09	1.348e+09	2.75319e+09	8.50326e+08	2.20637e+09	1.23992e+09	3.38173e+08	1.36394e+09	1.07096e+09	1.16339e+09	1.69888e+09	1.86796e+09	1.3791e+09	2.34435e+09	3.27118e+09
Putrescine	5.54586e+09	1.02388e+09	5.99482e+08	1.60271e+09	2.78949e+09	8.26962e+08	5.94902e+08	7.01267e+08	9.37978e+08	1.34906e+09	1.15468e+09	1.44307e+09	1.51868e+09	6.40572e+08	8.70513e+08	5.57688e+08	3.27759e+08	1.1193e+09	1.83614e+09	3.09887e+09	2.99722e+08	1.40261e+09	5.22328e+09	3.789e+08	4.44809e+08	1.09472e+09	9.23323e+08	1.42714e+09
Pyridoxamine	3.56441e+09	3.90923e+09	3.48366e+09	5.58505e+09	5.83213e+09	3.89821e+09	4.2271e+09	3.90038e+09	3.49914e+09	4.58611e+09	4.61336e+09	7.66683e+09	3.8561e+09	3.67498e+09	4.13437e+09	5.78299e+09	2.59948e+09	4.09216e+09	4.96866e+09	2.80417e+09	2.85771e+09	2.79167e+09	2.51199e+09	5.31078e+08	2.57748e+09	3.11168e+09	5.71317e+09	4.96209e+09
Pyridoxine	1.7715e+09	1.58622e+09	1.65808e+09	1.53654e+09	1.89935e+09	1.85256e+09	2.18068e+09	1.77372e+09	1.59948e+09	2.66155e+09	2.14504e+09	2.11724e+09	6.82099e+08	9.60694e+08	1.86592e+09	1.35333e+09	1.0745e+09	5.43481e+09	1.52181e+09	1.2164e+09	2.06774e+09	1.61245e+09	8.52422e+08	1.49537e+09	8.95277e+08	1.6107e+09	1.28547e+09	5.33791e+09
Quercetin	4.78739e+08	1.16812e+10	8.55048e+08	2.29737e+09	6.05319e+08	1.14085e+10	2.12419e+09	8.40465e+08	2.1333e+09	2.75191e+08	1.26024e+09	2.85785e+08	3.20753e+09	2.40696e+09	7.89865e+09	4.52453e+08	3.60523e+09	4.5737e+09	3.84293e+09	3.55427e+08	1.145e+09	3.62168e+08	1.93851e+09	2.8828e+08	3.31957e+09	4.57018e+08	2.07794e+10	3.20105e+08
Quinoline	8.50714e+08	6.88558e+08	6.8805e+08	6.20086e+08	5.58331e+08	6.35965e+08	4.78929e+08	6.53237e+08	6.85805e+08	5.34552e+08	7.06474e+08	8.59023e+08	5.22534e+08	5.98844e+08	6.00117e+08	6.63475e+08	8.26111e+08	5.72587e+08	7.08819e+08	5.59247e+08	5.44312e+08	5.21274e+08	3.58376e+08	2.90941e+08	4.61828e+08	5.57283e+08	6.01232e+08	6.94916e+08
RKK	1.01291e+10	5.63151e+09	9.04479e+09	4.10906e+09	6.23939e+09	3.96701e+09	4.97114e+09	6.11825e+09	5.48671e+09	6.21789e+09	7.91346e+09	8.23917e+09	1.06442e+10	1.02096e+10	6.02692e+09	8.51467e+09	2.01218e+10	1.11627e+10	4.47238e+09	9.36111e+09	1.01523e+10	7.54296e+09	9.83958e+09	8.77511e+09	8.38782e+09	9.8218e+09	4.90456e+09	4.17366e+09
RLH	5.57351e+08	3.77161e+08	1.13323e+09	4.35443e+08	6.56092e+08	6.02275e+08	6.20035e+08	6.54626e+08	4.33152e+08	6.2306e+08	6.11406e+08	6.69235e+08	4.62764e+08	4.99208e+08	5.15949e+08	6.51284e+08	7.55245e+08	8.95185e+08	3.75804e+08	4.46628e+08	1.14048e+09	6.91549e+08	5.09064e+08	3.22954e+08	3.81997e+08	8.44237e+08	3.73163e+08	2.56178e+08
RQH	2.54962e+08	2.46099e+08	2.74026e+08	2.12409e+08	2.666e+08	2.22495e+08	2.08484e+08	2.82895e+08	3.27152e+08	2.3626e+08	4.62011e+08	3.23152e+08	3.07299e+08	3.81965e+08	3.10264e+08	3.79468e+08	2.20939e+08	2.65684e+08	3.19248e+08	3.48309e+08	2.93563e+08	1.25763e+08	2.70373e+08	2.3748e+08	2.4443e+08	2.42958e+08	4.26893e+08	5.419e+08
Resorufin	1.64665e+10	1.10651e+10	4.50552e+09	5.74661e+09	1.03586e+10	1.20819e+10	9.22811e+09	1.18352e+10	1.42001e+10	1.28784e+10	1.13276e+10	4.75929e+09	1.87121e+10	1.5559e+10	1.14363e+10	6.77736e+09	1.47275e+10	2.07952e+10	1.24251e+10	1.00101e+10	1.94268e+10	2.00436e+10	9.54252e+09	1.17018e+10	7.70705e+09	1.43179e+10	1.59643e+10	8.73894e+09
S-Adenosylmethionine	1.13534e+09	1.59127e+08	9.63445e+08	6.71831e+08	7.98845e+08	6.57886e+08	6.71004e+08	1.07738e+09	1.41916e+09	2.90423e+08	7.10675e+08	2.6395e+09	6.10221e+08	9.53624e+08	4.49567e+07	2.32995e+09	4.27746e+07	6.21903e+08	2.30328e+09	9.53509e+08	3.94651e+08	7.56057e+08	4.69225e+08	6.49345e+08	2.3216e+08	3.56063e+08	1.44323e+09	1.12727e+09
SB236057A	2.03432e+10	2.2471e+10	9.33311e+09	2.02115e+10	1.89422e+10	1.93749e+10	6.77151e+09	1.75634e+10	1.71505e+10	1.74281e+10	1.96866e+10	2.16058e+10	1.52305e+10	6.88177e+09	1.66668e+10	2.05413e+10	2.9369e+10	2.33927e+10	9.19399e+09	1.24172e+10	1.67048e+10	2.21952e+10	1.53465e+10	2.14946e+10	1.90517e+10	2.52727e+10	1.86994e+10	2.2001e+10
SLK	1.64798e+09	1.95246e+09	1.34157e+09	1.1028e+09	1.91792e+09	1.88085e+09	1.47678e+09	1.50941e+09	2.37371e+09	2.2197e+09	1.65829e+09	3.91206e+09	3.76718e+08	1.67244e+09	1.966e+09	2.18151e+09	5.46294e+08	3.69414e+08	2.2694e+09	2.84985e+08	3.2046e+08	2.46628e+08	3.82131e+08	2.69296e+08	2.88219e+08	2.10475e+09	1.381e+09	1.67513e+09
SNK	1.45347e+09	1.6607e+09	1.53148e+09	1.90634e+09	1.57622e+09	1.60288e+09	1.31395e+09	1.83121e+09	2.27804e+09	1.71569e+09	2.13296e+09	2.27826e+09	2.20639e+09	1.66504e+09	2.20442e+09	1.55528e+09	1.54337e+09	1.68558e+09	1.99014e+09	1.92002e+09	1.99514e+09	1.71195e+09	1.73497e+09	1.96761e+09	1.52845e+09	1.47034e+09	2.23657e+09	2.29582e+09
Salicylamide	6.40977e+08	6.1595e+08	7.15418e+08	5.70129e+08	6.63079e+08	7.36967e+08	6.51188e+08	7.43382e+08	7.82023e+08	7.06424e+08	7.07692e+08	7.37832e+08	7.55035e+08	9.17195e+08	7.61333e+08	6.46485e+08	6.64887e+08	6.45712e+08	7.45266e+08	7.37306e+08	6.33105e+08	7.55583e+08	4.88877e+08	6.45361e+08	6.51638e+08	6.44579e+08	6.33526e+08	7.34062e+08
Sinapinic acid	1.79465e+09	9.10518e+08	1.42554e+09	1.35008e+09	1.72484e+09	2.19432e+09	2.02215e+09	1.57103e+09	6.76973e+09	2.07895e+09	1.0924e+09	7.38779e+08	1.19221e+09	1.60775e+09	1.65952e+09	9.90038e+08	1.73747e+09	1.47443e+09	9.25103e+08	2.44521e+09	2.36516e+09	1.17514e+09	2.34845e+09	1.22175e+09	5.62866e+08	1.97902e+09	6.49478e+08	9.3959e+08
Soyasaponin I	5.69496e+07	2.95204e+07	1.7936e+08	6.67818e+07	3.82635e+08	2.32775e+08	5.39198e+08	1.66369e+07	2.41239e+07	5.51752e+07	9.28791e+07	7.79334e+07	4.61046e+07	1.20603e+08	4.38657e+07	2.02527e+07	2.58143e+07	1.30107e+08	2.62173e+07	3.82226e+07	3.20345e+07	7.36428e+07	2.45235e+07	2.04093e+07	1.37227e+07	6.59949e+07	5.04608e+07	4.5627e+07
Spermidine	2.1884e+10	4.36479e+10	7.40286e+10	9.15228e+10	3.39013e+10	9.86818e+10	4.62288e+10	6.57172e+10	5.78825e+10	5.8505e+10	3.06447e+10	2.42985e+10	4.6675e+10	6.06423e+10	4.2442e+10	2.71983e+10	1.46996e+10	1.0516e+11	2.0848e+11	8.03143e+10	1.86548e+10	7.08994e+10	1.25986e+11	2.85042e+10	3.43104e+10	3.06864e+10	4.39426e+10	5.3748e+10
Spermine	1.23402e+09	3.08637e+08	1.78635e+09	1.83949e+09	1.37636e+09	1.49921e+09	1.14275e+09	1.58465e+09	1.58816e+09	2.3589e+09	2.63068e+08	7.59396e+08	8.18338e+08	8.80425e+08	1.41752e+09	1.24743e+09	1.44413e+09	2.00046e+09	2.09315e+09	1.61009e+09	1.06716e+09	1.96929e+09	1.68937e+09	1.6038e+09	2.14946e+08	1.19342e+09	1.04117e+09	1.39609e+09
Sphingosine (d18:1)	3.45347e+09	7.4395e+09	8.07664e+09	1.02762e+10	6.56428e+09	1.41808e+10	8.35801e+09	1.15299e+10	1.43842e+10	1.12116e+10	7.99714e+09	6.17639e+09	7.92653e+09	2.76108e+09	3.01113e+09	12077252054	1.33019e+10	1.17945e+10	1.25877e+10	1.73996e+10	8.44574e+09	1.60375e+10	8.41737e+09	1.41803e+10	7.62184e+09	1.01032e+10	2.11358e+09	6.19301e+09
Stearamide	4.42015e+08	6.87784e+08	9.58635e+08	1.09147e+09	6.45563e+08	1.4579e+09	8.46381e+08	1.14592e+09	8.71605e+08	3.76066e+08	6.30132e+08	8.73098e+08	1.17788e+09	2.15123e+08	5.14686e+08	4.497e+08	6.72493e+08	1.33471e+09	1.36483e+09	9.72918e+08	6.68807e+08	9.88549e+08	7.47375e+08	8.54872e+08	9.24999e+08	1.08829e+09	1.61516e+08	5.94242e+08
Stearic acid	1.33808e+08	1.31953e+08	1.66784e+08	2.09675e+08	7.11831e+07	1.96153e+08	5.79461e+07	2.0003e+08	2.82454e+08	8.32268e+07	9.35759e+07	7.79754e+07	6.47893e+07	1.70977e+08	2.39492e+08	2.12873e+08	5.90205e+07	2.01096e+08	1.02108e+08	6.98814e+07	1.07751e+08	7.42914e+07	7.74642e+07	6.89371e+07	5.98946e+07	7.72067e+07	1.00448e+08	1.12448e+08
Stearidonoyl glycine	5.25576e+08	9.77584e+08	9.31142e+08	8.25203e+08	6.25659e+08	7.03938e+08	7.25576e+08	9.0458e+08	9.00399e+08	1.06419e+09	8.10792e+08	8.45657e+08	9.96349e+08	5.79184e+08	5.5006e+08	8.93807e+08	5.38986e+08	7.98778e+08	6.81367e+08	9.29374e+08	9.79733e+08	9.20177e+08	9.78804e+08	1.29133e+09	1.07597e+09	5.7037e+08	9.56823e+08	1.03088e+09
Stearoyl ethanolamide	5.22027e+09	2.28794e+09	3.75097e+09	3.8058e+09	3.70144e+09	7.45396e+09	3.15312e+09	1.06139e+10	1.00363e+10	5.44417e+09	2.29423e+09	2.61109e+09	7.30141e+09	1.41838e+09	2.3689e+09	4.01367e+09	6.29291e+09	5.10761e+09	2.55103e+09	6.23114e+09	1.30113e+10	9.2628e+09	5.53897e+09	2.32009e+09	1.90293e+09	4.15723e+09	3.51167e+09	2.08519e+09
Suberic acid	4.92441e+09	7.2581e+09	4.14305e+09	3.75505e+09	4.84379e+09	6.69458e+09	4.4346e+09	7.84424e+09	4.99741e+09	5.48596e+09	6.91397e+09	9.53524e+09	7.78937e+09	7.3714e+09	8.70494e+09	5.48786e+09	1.02478e+10	7.74065e+09	6.24682e+09	8.43591e+09	6.65466e+09	6.50172e+09	4.44357e+09	5.95116e+09	9.04576e+09	6.61647e+09	6.48728e+09	1.05543e+10
Succinic acid	5.01574e+09	1.20091e+10	5.19471e+09	6.49534e+09	1.42232e+10	7.28342e+09	8.58666e+09	9.89803e+09	1.36608e+10	6.35011e+09	8.26774e+09	1.04284e+10	6.14568e+09	7.35188e+09	1.04821e+10	5.00711e+09	6.99117e+09	3.88645e+10	5.17249e+09	4.53712e+09	5.85644e+09	3.47598e+09	5.83438e+09	5.56648e+09	4.52405e+09	3.27937e+10	7.96371e+09	5.63957e+09
Syringic acid	7.39329e+08	3.95494e+08	4.18805e+08	2.90408e+08	3.46814e+09	2.25838e+09	7.83604e+09	4.83743e+09	4.02156e+09	1.06979e+09	3.55137e+08	6.77116e+08	7.28763e+08	2.73733e+08	6.60497e+08	3.35554e+08	4.00177e+09	1.32123e+09	3.5933e+08	9.81855e+08	7.97988e+08	6.01287e+08	2.14178e+09	2.81204e+09	4.29429e+08	1.35813e+10	4.8012e+08	1.00054e+09
T-2 Triol	6.12222e+08	9.58449e+08	1.20944e+09	9.26779e+08	7.80909e+08	1.05966e+09	1.00993e+09	8.65486e+08	6.97304e+08	1.05465e+09	1.42078e+09	8.79515e+08	2.18363e+09	1.24894e+09	9.53375e+08	3.32312e+08	7.77893e+08	1.02069e+09	9.0854e+08	1.02346e+09	1.74539e+09	6.92834e+08	7.16128e+08	1.08999e+09	1.03673e+09	8.28863e+08	9.77084e+08	8.30437e+08
TLK	9.43076e+08	1.3146e+09	7.14373e+08	6.75237e+08	1.28666e+09	1.7947e+09	9.10588e+08	1.20379e+09	1.55991e+09	2.56643e+09	1.02016e+09	2.31545e+09	3.86911e+08	1.18272e+09	1.21255e+09	1.32963e+09	4.5452e+08	2.86762e+08	1.92345e+09	2.16855e+08	1.23781e+08	1.72306e+08	3.38658e+08	1.10908e+08	1.44338e+08	8.24671e+08	1.30006e+09	1.39056e+09
TPH	8.5424e+07	1.20395e+08	5.19693e+07	4.69142e+07	1.06334e+08	1.33452e+08	1.00789e+08	1.95587e+08	1.9484e+08	5.46635e+08	2.30879e+08	2.46024e+08	4.06363e+07	1.50195e+08	1.95194e+08	1.06423e+08	1.08262e+08	5.39092e+07	3.31753e+08	1.05931e+08	1.46361e+08	1.0815e+08	5.17833e+07	6.29525e+07	8.41164e+07	6.73348e+07	2.75176e+08	1.3643e+08
Taurine	2.21696e+10	2.1511e+10	2.56044e+10	2.68351e+10	2.17065e+10	1.84763e+10	1.25245e+10	1.64734e+10	2.85081e+10	2.5314e+10	2.32321e+10	3.03593e+10	1.45894e+10	1.22486e+10	1.86052e+10	3.21254e+10	1.55605e+10	1.2717e+10	2.95714e+10	2.66375e+10	1.35541e+10	2.41636e+10	1.71797e+10	3.18604e+10	2.53586e+10	2.41411e+10	1.0369e+10	1.0079e+10
Taurochenodeoxycholic acid	1.20756e+10	1.0654e+08	1.37539e+10	6.28522e+09	4.66436e+09	8.7581e+09	6.13045e+09	7.16959e+09	1.1603e+10	1.17606e+10	3.00938e+10	1.20343e+10	1.22693e+10	2.39899e+09	1.34782e+08	7.66464e+09	1.21053e+09	5.65439e+08	3.23882e+08	2.41933e+09	5.80316e+09	2.09585e+09	2.02101e+09	1.09789e+10	2.12556e+09	5.13031e+08	5.39557e+09	6.56187e+09
Taurodeoxycholic Acid (sodium salt)	3.20539e+08	1.03251e+08	4.1423e+08	7.46434e+07	4.45646e+08	6.11161e+07	1.25726e+08	5.64366e+07	3.01252e+08	3.74199e+08	1.2049e+08	5.01342e+08	8.2409e+07	1.32518e+08	1.62481e+08	1.83484e+08	1.12651e+08	3.3308e+08	2.25628e+08	3.74708e+08	9.39477e+07	5.52009e+08	8.15387e+07	7.14385e+08	3.16923e+08	1.43852e+08	2.79408e+08	8.29043e+07
Tauroursodeoxycholic acid	2.41251e+10	1.89758e+10	2.12332e+10	2.08558e+10	1.49022e+10	5.50921e+09	4.30715e+09	4.53701e+09	2.21537e+10	1.89102e+10	5.15426e+10	5.92483e+10	1.94091e+10	1.8258e+10	2.17713e+10	8.98826e+10	1.17596e+10	3.66425e+09	4.93555e+10	3.1659e+10	1.33001e+10	3.63185e+10	2.48407e+10	7.45034e+10	2.8208e+10	1.83058e+10	5.5049e+09	8.88715e+09
Testosterone propionate	3.83324e+08	3.66893e+08	5.18908e+08	1.35338e+08	3.14964e+08	6.31608e+08	1.22064e+08	6.51534e+08	2.67877e+08	3.45539e+08	4.49938e+08	6.87565e+08	5.15344e+08	2.32047e+08	3.13604e+08	3.94015e+08	2.16887e+08	3.12986e+08	2.68785e+08	3.28783e+08	7.12606e+08	3.92715e+08	3.41215e+08	4.13281e+08	5.68841e+08	3.38349e+08	4.61078e+08	3.11148e+08
Tetradecanedioic acid	5.3602e+08	8.08065e+08	6.87263e+08	5.00888e+08	4.12828e+08	4.14511e+08	4.43353e+08	4.48288e+08	4.72386e+08	6.60484e+08	1.16378e+09	6.22761e+08	1.4868e+09	8.25069e+08	4.55424e+09	3.75447e+09	3.16683e+09	1.04146e+09	4.4797e+09	5.96248e+08	7.46396e+08	7.88707e+08	7.9358e+08	7.65917e+08	1.19681e+09	7.17306e+08	1.07932e+09	3.06114e+09
Thiamine	4.17489e+10	5.2698e+10	4.43618e+10	4.60735e+10	1.34176e+11	7.18607e+08	4.70597e+08	1.00592e+11	6.51189e+08	5.98299e+10	5.68093e+10	8.53646e+10	7.9961e+10	4.36612e+10	9.58332e+10	6.23373e+10	1.20321e+11	1.40471e+11	5.46357e+10	7.10481e+08	6.6931e+10	6.33032e+10	5.41601e+10	6.89499e+10	6.78596e+10	8.61577e+10	7.19956e+10	9.42024e+10
Thiofentanyl	5.498e+09	2.76018e+09	2.51055e+09	1.50262e+09	2.53004e+09	5.56169e+09	5.45914e+09	1.84726e+09	1.44128e+09	1.86781e+09	5.02541e+09	1.41809e+10	8.39966e+08	2.60854e+09	9.36177e+08	1.2029e+09	2.71772e+09	1.51236e+09	2.49559e+09	2.2682e+09	6.39743e+08	1.17108e+09	2.68192e+09	1.61099e+09	2.93988e+08	1.97319e+09	8.83337e+09	3.74779e+09
Threonine	1.46419e+10	9.95144e+09	1.21074e+10	1.3459e+10	6.23746e+09	3.59148e+09	7.28293e+09	7.23094e+09	1.47734e+10	9.62573e+09	7.45378e+09	7.65225e+09	2.76846e+09	1.51198e+10	1.59692e+10	1.39325e+10	3.14486e+09	1.89465e+09	1.01157e+10	2.46098e+09	1.6078e+09	2.71029e+09	4.26114e+09	2.53691e+09	2.39925e+09	1.22271e+10	9.5081e+09	1.33158e+10
Thymidine	2.17688e+10	1.27756e+10	7.62791e+09	1.35443e+10	9.06418e+09	8.08519e+09	1.10495e+10	7.99695e+09	8.32683e+09	1.37386e+10	1.14511e+10	9.1814e+09	1.23801e+10	1.8484e+09	5.85828e+09	7.9378e+09	1.3009e+10	1.21675e+10	8.53345e+09	8.8282e+09	4.35205e+09	1.32375e+10	1.39399e+10	9.78905e+09	9.67135e+09	2.33114e+10	6.61931e+09	7.32935e+09
Thymine	2.21744e+10	1.84726e+10	1.12484e+10	1.69157e+10	1.56967e+10	1.38104e+10	1.41206e+10	1.17506e+10	1.4245e+10	2.04659e+10	1.89553e+10	1.43062e+10	1.84405e+10	9.37832e+09	1.17399e+10	1.39962e+10	1.64795e+10	1.77232e+10	1.42435e+10	1.41458e+10	1.03199e+10	1.65063e+10	1.78439e+10	1.72483e+10	1.38261e+10	2.16268e+10	1.12967e+10	1.50374e+10
Tiglic acid	2.38253e+09	3.31669e+09	1.33971e+10	1.02265e+09	3.28649e+09	2.11906e+09	6.71296e+08	8.78534e+08	4.64367e+10	1.07652e+09	4.4609e+09	1.1105e+09	8.95003e+08	1.6639e+09	1.28509e+09	1.37059e+09	1.94889e+10	8.39182e+08	1.01427e+10	3.47148e+08	2.20713e+09	9.18795e+08	1.07028e+09	6.9692e+08	7.25692e+08	8.91091e+08	1.55802e+09	2.019e+09
Tixocortol pivalate	4.30268e+08	3.46763e+08	4.03716e+08	4.61696e+08	4.15132e+08	3.32134e+08	2.84605e+08	3.5513e+08	4.31217e+08	1.85934e+08	2.73563e+08	2.39921e+08	3.1999e+08	3.7695e+08	4.06085e+08	1.83289e+08	7.09544e+07	3.9402e+08	4.16299e+08	4.47654e+08	2.30177e+08	2.8347e+08	2.89579e+08	1.5037e+08	2.36651e+08	2.60117e+08	3.85849e+08	3.18389e+08
Tolycaine	4.62973e+09	9.87001e+09	3.02602e+09	1.29288e+10	1.955e+10	1.80256e+10	8.75546e+09	1.14377e+10	1.10394e+10	1.30881e+10	7.41162e+09	2.32143e+10	6.75572e+09	5.59013e+09	1.03445e+10	1.16906e+10	6.3754e+09	1.04072e+10	1.19866e+10	2.67887e+09	4.70195e+09	4.33713e+09	5.33219e+09	6.92698e+09	3.42331e+09	1.06137e+10	1.28718e+10	1.78761e+10
Tramadol N-Oxide	2.76206e+08	1.72855e+08	3.03755e+08	9.56813e+07	2.52059e+08	4.60504e+07	2.16682e+08	2.12894e+08	1.95734e+08	2.67211e+08	3.15438e+08	2.31083e+08	4.26361e+08	2.8697e+08	2.82844e+08	3.6314e+08	1.46191e+08	2.65534e+08	2.71542e+08	1.6213e+08	2.01999e+08	2.8946e+08	1.6315e+08	4.13544e+08	2.98425e+08	4.03002e+08	3.45794e+08	8.9373e+08
Tridecylic acid	6.90333e+09	8.06001e+09	8.26288e+09	8.97085e+09	6.02915e+09	9.1726e+09	9.19869e+09	6.09183e+09	6.16463e+09	7.77973e+09	1.26967e+10	8.60317e+09	1.46905e+10	1.1249e+10	2.39462e+10	1.14929e+10	1.74833e+10	2.89658e+10	9.00218e+09	1.18968e+10	1.89245e+10	2.01815e+10	1.58471e+10	1.30842e+10	1.21426e+10	1.3522e+10	1.43631e+10	1.36196e+10
Tridemorph	9.42111e+07	8.60423e+07	1.24203e+08	8.96132e+07	1.26294e+08	1.25003e+08	9.73128e+07	1.19876e+08	8.77042e+07	9.69217e+07	9.59919e+07	1.39851e+08	9.99658e+07	4.74344e+07	5.77782e+07	1.06775e+08	8.52647e+07	1.06812e+08	7.37059e+07	1.01725e+08	1.73782e+08	9.17265e+07	1.07225e+08	8.99371e+07	3.21235e+07	9.70139e+07	1.02672e+08	2.87042e+07
Triethyl phosphate	3.68746e+09	4.73112e+09	6.38865e+09	4.94229e+09	3.64572e+09	3.84613e+09	3.42872e+09	4.08605e+09	5.17562e+09	8.46278e+09	4.05691e+09	3.02797e+09	9.48737e+09	2.814e+09	3.13464e+09	4.48562e+09	7.11049e+09	4.79231e+09	5.53351e+09	9.43916e+09	5.64173e+09	9.99925e+09	5.22944e+09	7.63033e+09	5.14432e+09	7.25468e+09	4.64805e+09	3.70892e+09
Triethyleneglycol bis(2-ethylhexanoate)	2.62802e+08	8.30968e+09	2.35305e+07	7.3404e+07	2.2779e+07	7.39227e+07	4.78476e+07	2.02787e+07	2.04525e+07	3.02307e+07	2.4342e+07	4.78857e+07	1.17689e+09	3.30063e+07	6.23756e+07	3.29532e+07	3.78986e+07	3.11169e+07	1.24827e+07	2.41765e+09	3.51674e+07	3.53154e+08	4.4109e+07	3.62629e+09	2.32232e+07	7.80406e+07	2.42011e+07	6.22376e+07
Tris(2-ethylhexyl) phosphate	6.49188e+07	3.66924e+07	1.17164e+08	6.61618e+07	1.11812e+08	1.00586e+08	6.25925e+07	6.39997e+07	8.24748e+07	8.20279e+07	4.93763e+07	1.08851e+08	1.16479e+08	3.96577e+07	9.19029e+07	7.40084e+07	6.91001e+07	1.04592e+08	8.47886e+07	1.12007e+08	7.17087e+07	1.06702e+08	7.90148e+07	9.52063e+07	9.77769e+07	1.08105e+08	8.4461e+07	1.22339e+08
Tyramine	4.02817e+08	5.35874e+08	2.08421e+09	1.72965e+09	5.05178e+09	6.93381e+09	1.52895e+09	4.58618e+09	3.14852e+09	2.0197e+09	5.1338e+09	1.50785e+08	1.05934e+09	2.11098e+10	1.72779e+09	3.42569e+09	6.18412e+08	3.72249e+09	2.52111e+09	1.41459e+09	2.87132e+09	7.60338e+08	9.20349e+09	7.72597e+08	6.19909e+08	2.99934e+09	2.33207e+09	5.43711e+09
Tyrosol	1.57587e+09	1.45818e+10	1.23269e+09	1.6931e+10	4.45684e+09	4.62344e+09	1.72144e+09	2.93553e+09	1.82735e+09	2.99371e+10	2.34896e+10	1.3174e+10	3.38883e+10	1.94394e+10	1.83555e+10	2.06827e+10	1.3645e+10	2.33665e+10	2.13734e+10	1.5141e+10	5.44988e+09	3.34583e+09	1.04917e+10	2.24733e+10	3.72446e+08	8.52709e+09	4.55806e+09	9.78464e+09
Undecanoic acid	1.0494e+09	1.5894e+09	1.63494e+09	1.59412e+09	1.47292e+09	1.37421e+09	1.29254e+09	1.56496e+09	1.02903e+09	1.25089e+09	2.04738e+09	1.34223e+09	1.47515e+09	1.3287e+09	1.83198e+09	1.57943e+09	1.77041e+09	2.72428e+09	2.21015e+09	1.77071e+09	2.24732e+09	2.76128e+09	1.95612e+09	1.86306e+09	1.27122e+09	1.7766e+09	1.55269e+09	1.49465e+09
Uracil	2.47809e+10	3.78837e+10	3.19263e+10	3.37265e+10	3.06312e+10	2.55152e+10	2.50757e+10	2.36882e+10	1.77254e+10	4.13616e+10	4.46549e+10	3.80374e+10	4.49239e+10	4.04414e+10	3.24302e+10	4.60391e+10	3.57614e+10	3.6558e+10	3.68471e+10	2.92771e+10	3.3856e+10	4.27853e+10	3.94658e+10	3.65375e+10	1.70904e+10	3.68708e+10	2.30724e+10	3.3317e+10
Uric acid	2.39063e+09	1.89825e+09	1.58201e+09	1.37782e+09	1.23945e+09	6.93197e+08	1.00372e+09	1.24168e+09	1.2802e+09	1.84855e+09	2.08097e+09	2.03895e+09	1.83729e+09	2.86729e+09	2.49037e+09	1.47093e+09	2.49245e+09	1.67981e+09	1.21606e+09	1.39359e+09	1.84298e+09	2.42183e+09	1.83651e+09	2.58698e+09	2.05249e+09	3.48375e+09	7.74584e+08	1.11839e+09
Uridine	6.19131e+09	1.92636e+09	4.28313e+09	2.86878e+09	1.14956e+09	1.21206e+09	1.23884e+09	1.18071e+09	1.3017e+09	2.06719e+09	3.59931e+09	2.57428e+09	2.3024e+09	2.66338e+09	5.32428e+09	2.92389e+09	7.44056e+09	2.18753e+09	2.2409e+09	1.09081e+09	3.109e+09	2.23527e+09	2.03637e+09	1.92083e+09	3.95501e+09	8.91623e+09	1.55138e+09	2.89307e+09
Urocanic acid	4.42042e+10	3.56709e+10	2.81232e+10	9.96219e+09	1.68708e+10	3.48252e+10	2.43806e+10	2.56359e+10	3.25243e+10	1.3312e+10	1.07744e+10	1.6226e+10	6.56924e+09	3.45585e+10	3.24488e+10	9.64939e+09	2.61479e+10	4.11849e+09	3.00051e+10	1.23471e+10	7.95731e+09	1.7511e+10	3.05859e+09	1.2836e+10	1.54507e+10	3.79977e+10	3.18054e+10	3.61422e+10
VLH	1.21408e+09	1.61361e+09	6.22185e+08	1.09509e+09	1.47055e+09	2.22196e+09	8.3827e+08	1.84543e+09	5.12704e+08	4.84609e+08	1.66747e+09	3.75442e+09	2.06377e+08	3.74423e+08	8.86185e+08	1.28297e+09	3.41928e+08	1.72024e+08	9.23724e+08	1.90584e+08	1.47433e+08	1.03935e+08	1.50936e+08	2.40017e+08	1.89787e+08	5.57543e+08	6.089e+08	3.71542e+08
VLK	3.64994e+09	5.30279e+09	3.54366e+09	2.56716e+09	6.23132e+09	7.84469e+09	4.19568e+09	4.52761e+09	5.73056e+09	5.21248e+09	6.2984e+09	1.27327e+10	5.86979e+08	1.7143e+09	2.79866e+09	6.42762e+09	1.74766e+09	5.1397e+08	1.00925e+10	4.77807e+08	4.56318e+08	4.70314e+08	8.26545e+08	9.42057e+08	7.03475e+08	2.49773e+09	1.52002e+09	5.24795e+09
VNK	5.20086e+08	2.82201e+08	2.71459e+08	1.99168e+08	1.3757e+08	5.82227e+07	1.71393e+08	1.71739e+08	6.36992e+08	4.40514e+07	1.97845e+08	6.8872e+08	3.62026e+07	6.24554e+08	3.98944e+08	3.03094e+08	5.99013e+07	4.33659e+07	1.45173e+08	4.82653e+07	3.14527e+07	3.04298e+07	3.13756e+07	3.17402e+07	2.99152e+07	6.55778e+07	1.57005e+08	7.16877e+07
Valeric acid	4.77862e+10	4.86431e+10	5.61467e+10	5.40688e+10	4.4694e+10	3.51731e+10	4.40312e+10	6.13845e+10	4.92091e+10	7.07981e+10	7.6895e+10	4.16171e+10	7.88181e+10	4.0929e+10	3.32503e+10	6.86625e+10	4.88566e+10	4.9414e+10	7.0523e+10	5.84514e+10	5.82645e+10	6.63979e+10	8.68648e+10	5.06437e+10	5.1641e+10	5.71941e+10	5.05952e+10	5.68372e+10
Valylproline	9.01338e+09	2.63279e+10	2.33998e+10	1.35167e+10	1.26887e+10	1.87621e+10	2.19759e+10	1.72765e+10	2.85182e+10	8.93116e+09	9.47893e+09	1.67873e+10	1.92533e+10	1.02541e+10	1.04369e+10	2.44878e+10	7.24946e+09	1.26326e+10	6.39498e+10	4.25533e+09	3.02834e+09	3.46956e+09	3.39166e+09	6.03256e+09	4.80626e+09	9.15029e+09	2.75241e+10	1.549e+10
Vitamin E Acetate	4.53033e+08	2.62549e+08	5.94321e+08	3.97974e+08	6.42692e+08	4.84001e+08	4.83623e+08	4.71658e+08	7.18124e+08	7.52807e+08	8.87722e+08	8.20624e+08	1.29404e+09	3.58105e+08	5.96864e+08	7.2309e+08	5.46254e+08	1.13949e+09	5.53655e+08	9.16557e+08	6.86999e+08	1.04402e+09	5.14123e+08	8.68809e+08	4.52589e+08	9.57979e+08	6.45966e+08	5.97686e+08
WKK	2.41847e+08	6.26349e+08	5.03175e+08	3.05744e+08	4.83754e+08	4.63331e+08	2.79366e+08	6.78213e+08	3.3742e+08	4.90801e+08	4.69672e+08	2.13076e+08	9.1058e+08	3.34162e+08	7.70989e+08	5.02254e+08	5.40047e+08	7.70932e+08	4.35408e+08	3.80383e+08	4.21133e+08	4.11228e+08	7.4274e+08	7.34136e+08	1.63381e+08	6.93593e+08	1.38266e+09	6.49902e+08
XLR11 N-(4-hydroxypentyl) metabolite-d5	9.45833e+09	9.88583e+09	1.12395e+10	9.99673e+09	1.64571e+10	7.87858e+09	7.50962e+09	1.17664e+10	9.53617e+09	1.19935e+10	9.84451e+09	1.02031e+10	1.33742e+10	4.84538e+09	8.13187e+09	1.20305e+10	2.82682e+10	1.53041e+10	1.05408e+10	1.16234e+10	1.95358e+10	8.5486e+09	1.45286e+10	1.02274e+10	5.37398e+09	8.983e+09	7.33853e+09	4.8874e+09
Xanthine	6.57289e+10	7.43371e+10	5.15484e+10	6.25934e+10	6.35878e+10	5.77876e+10	5.03545e+10	5.21204e+10	4.29907e+10	7.77734e+10	6.89063e+10	7.52906e+10	6.28304e+10	9.59165e+10	8.28751e+10	7.17185e+10	6.95829e+10	6.55135e+10	5.90507e+10	4.71692e+10	6.35281e+10	6.0458e+10	6.48839e+10	6.76447e+10	4.85215e+10	8.32033e+10	5.04017e+10	6.12322e+10
Xanthosine	1.49531e+09	1.0897e+09	6.80216e+08	2.46335e+08	5.27511e+08	3.41794e+08	5.88224e+08	4.51347e+08	4.56459e+08	2.60911e+08	5.36326e+08	2.76274e+09	7.23809e+08	6.62994e+08	2.36886e+09	7.68822e+08	1.95402e+09	2.59023e+08	1.10799e+08	9.96698e+07	3.66156e+07	1.09096e+09	1.24424e+09	5.71654e+08	5.94692e+08	1.39868e+09	2.88426e+08	7.14637e+08
Xanthurenic acid	4.36773e+09	4.21197e+09	5.48055e+09	4.82791e+09	4.30258e+09	2.98534e+09	4.59887e+09	4.93318e+09	5.92835e+09	5.02034e+09	4.50983e+09	4.53489e+09	6.50944e+09	5.29162e+09	5.19155e+09	1.65371e+09	1.59206e+09	4.4091e+09	2.08712e+09	6.4365e+09	3.40271e+09	4.99332e+09	3.59995e+09	5.13309e+09	3.30513e+09	4.78177e+09	4.57386e+09	4.5087e+09
YLK	6.34611e+08	9.8363e+08	7.54805e+08	5.48038e+08	1.01748e+09	1.51612e+09	8.57269e+08	9.55888e+08	9.94071e+08	2.09057e+08	6.77401e+08	2.23613e+09	1.69089e+08	6.31271e+08	8.62018e+08	9.76416e+08	3.33264e+08	1.45492e+08	2.24401e+09	4.35382e+07	9.31759e+07	1.27033e+08	1.33891e+08	6.02982e+07	3.69975e+07	1.10588e+09	1.04665e+09	8.21781e+08
Zolpidem-d6	5.03997e+07	7.36597e+07	8.45526e+07	9.56177e+07	4.73204e+07	6.99994e+07	4.43446e+07	5.46497e+07	9.8806e+07	7.46676e+07	4.09692e+07	5.77828e+07	1.85247e+08	5.57404e+07	1.8252e+08	8.5683e+07	1.10716e+08	1.6765e+08	6.98775e+07	1.40474e+08	9.81182e+07	9.68843e+07	1.56279e+08	5.24858e+07	8.20012e+07	6.07469e+07	8.0281e+07	3.10812e+08
[(1S,6S,7R)-6-(acetyloxy)-1-[(3-methylbutanoyl)oxy]-4a,5,6,7a-tetrahydro-1H-spiro[cyclopenta[c]pyran-7,2'-oxirane]-4-yl]methyl 3-methylbutanoate	4.3854e+09	3.22693e+09	6.8376e+09	6.69418e+09	5.20666e+09	2.76758e+09	5.42411e+09	6.42729e+09	2.26836e+09	6.68381e+09	6.34845e+09	5.36427e+09	8.33806e+09	6.85932e+09	5.9883e+09	3.89386e+09	5.5222e+09	6.82491e+09	6.80791e+09	7.28407e+09	5.69297e+09	6.62651e+09	3.7237e+09	8.07262e+09	7.97745e+09	5.00502e+09	6.51371e+09	4.94567e+09
[(3R,4S)-3-[(6-Fluoro-3,4-dihydro-1-isoquinolinyl)methyl]-1-(4-morpholinylcarbonyl)-4-piperidinyl]acetic acid	5.22619e+08	2.93898e+08	2.37e+08	6.69928e+08	6.57761e+08	7.37903e+08	5.65748e+08	9.49136e+08	7.24986e+08	2.63453e+08	1.79098e+08	3.26853e+08	4.21726e+08	2.7297e+08	4.89643e+08	1.08032e+08	1.85421e+08	2.43976e+08	3.39004e+08	8.16664e+08	8.78168e+08	5.99106e+08	6.84793e+08	5.57416e+08	1.51509e+08	1.10898e+08	8.31858e+08	2.39407e+08
[(3R,4S)-3-[(6-Methoxy-3,4-dihydro-1-isoquinolinyl)methyl]-1-(4-morpholinylcarbonyl)-4-piperidinyl]acetic acid	2.69943e+09	3.48799e+09	3.52638e+09	3.85489e+09	2.98166e+09	2.45403e+08	1.30073e+09	3.34252e+09	3.34643e+09	2.28077e+09	2.68425e+08	2.87498e+09	3.72842e+09	2.84238e+09	1.25155e+08	3.16897e+09	2.59169e+09	3.80514e+09	2.07065e+09	3.09727e+09	3.41759e+09	2.46494e+09	2.8103e+09	3.12321e+09	2.80568e+09	2.50562e+09	2.5816e+07	3.24495e+09
[3,5-di(tert-butyl)-1H-pyrazol-1-yl](4-methyl-1,2,3-thiadiazol-5-yl)methanone	6.8401e+08	4.59469e+08	3.99642e+08	7.14843e+08	7.93077e+08	8.08445e+08	9.26912e+08	8.07609e+08	1.30795e+09	1.46715e+09	1.57305e+08	3.79757e+08	4.65499e+08	1.78823e+09	1.02244e+09	5.02673e+09	1.75882e+08	3.81342e+08	1.07663e+09	5.08111e+08	9.66682e+08	1.12865e+09	1.1273e+09	2.72743e+08	1.1612e+09	4.02648e+08	1.47417e+09	9.79032e+09
[4-(9H-fluoren-9-yl)piperazino][1-(4-methoxyphenyl)-5-methyl-1H-pyrazol-4-yl]methanone	6.67603e+08	1.11949e+09	1.63197e+08	7.93844e+08	8.82601e+08	9.80475e+08	6.91303e+08	1.06987e+09	8.70298e+07	4.42658e+07	9.16039e+08	6.35406e+08	7.87063e+08	1.41108e+09	7.32415e+08	1.50035e+08	4.39984e+08	6.48432e+08	7.88371e+08	6.00532e+08	7.72421e+08	6.06581e+08	6.92694e+08	4.54556e+08	9.26138e+08	1.04158e+09	8.89218e+08	8.04437e+08
[5-(2-methylimidazo[1,2-a]pyridin-3-yl)-1H-pyrazol-1-yl][4-(trifluoromethyl)phenyl]methanone	5.97544e+08	4.61266e+09	5.66906e+08	1.2426e+09	4.00972e+08	1.0227e+09	1.2324e+09	1.03649e+09	1.08307e+08	7.41005e+07	2.23314e+09	9.46045e+08	4.8919e+08	1.46388e+08	8.26841e+08	2.73404e+09	1.17703e+08	1.3005e+09	3.30965e+08	1.1844e+09	7.2666e+08	3.8946e+08	6.43446e+08	1.30308e+09	2.2075e+09	1.7795e+09	1.20001e+08	4.03842e+07
all-cis-4,7,10,13,16-Docosapentaenoic acid	5.83537e+09	8.98229e+09	7.28789e+09	4.53255e+09	9.59093e+09	9.43223e+09	9.06692e+09	7.62155e+09	1.1808e+10	6.92607e+09	7.97817e+09	1.64096e+10	1.00996e+10	1.11824e+10	6.68907e+09	1.03934e+10	6.41759e+09	4.87673e+09	8.25408e+09	1.11239e+10	4.40476e+09	9.76724e+09	4.65769e+09	1.01895e+10	1.01025e+10	9.57746e+09	1.04986e+10	8.75787e+09
bicyclo[2.2.2]oct-2-en-1-yl 4-methylbenzene-1-sulfonate	2.47803e+07	2.31378e+07	2.09394e+07	2.19539e+07	1.61079e+07	1.10095e+07	8.25827e+06	2.37309e+07	2.63641e+07	3.21178e+07	3.52061e+07	3.45924e+07	4.5191e+07	1.71757e+07	2.84301e+07	8.47719e+06	5.85807e+06	1.21135e+07	2.03202e+07	1.84506e+07	2.75864e+07	2.16509e+07	2.19151e+07	2.76996e+07	2.31583e+07	2.52169e+07	2.80778e+07	2.20085e+07
cis,cis-Muconic acid	1.63481e+08	1.79406e+08	1.72068e+08	1.81224e+08	1.79632e+08	1.76504e+08	1.57535e+08	2.09844e+08	1.87254e+08	1.94037e+08	1.51445e+08	1.64007e+08	1.38784e+08	1.61895e+08	1.83577e+08	1.76335e+08	1.34246e+08	1.41522e+08	1.98442e+08	1.51205e+08	1.24674e+08	1.47681e+08	1.33133e+08	1.35934e+08	1.29104e+08	1.7908e+08	1.74641e+08	1.92523e+08
cis-12-Octadecenoic acid methyl ester	1.3872e+08	4.54821e+08	1.87366e+08	2.44087e+09	7.5033e+08	3.98643e+09	2.28831e+08	3.30975e+08	4.71414e+08	3.05755e+09	1.99062e+08	2.42966e+09	1.35689e+08	7.52832e+07	1.06001e+09	3.50896e+08	1.42636e+08	1.31345e+08	2.61466e+08	2.48898e+08	3.60052e+08	1.12572e+08	4.83626e+08	4.29023e+08	1.82144e+09	2.3361e+09	1.94136e+09	1.04539e+08
ethyl 4-(1,3-dimethyl-2,6-dioxo-1,2,3,6-tetrahydropyrimidin-4-yl)tetrahydropyrazine-1(2H)-carboxylate	4.13905e+09	4.34843e+09	6.57745e+09	6.20873e+09	6.64248e+09	3.2632e+09	5.39025e+09	3.4774e+09	2.89891e+09	2.99075e+10	1.92093e+10	1.22096e+10	2.21479e+10	2.61832e+10	1.94114e+10	3.73265e+09	3.26358e+10	2.0437e+10	2.23043e+10	2.49534e+10	1.0288e+10	1.27669e+10	1.3891e+10	2.49265e+10	1.13173e+10	1.60398e+10	7.02272e+09	1.60332e+10
methyl 2-(6-hydroxy-3-oxo-3H-xanthen-9-yl)benzoate	4.46673e+09	1.39299e+09	7.92932e+09	7.52135e+09	5.64218e+09	3.7128e+09	8.57596e+09	2.98973e+09	7.63586e+09	1.28263e+09	1.21975e+09	5.84461e+09	3.85284e+09	4.08513e+09	3.08645e+09	1.65964e+09	3.56722e+09	1.61974e+09	1.21932e+09	2.28195e+09	8.91056e+09	1.60547e+09	6.05307e+09	7.20752e+09	6.17041e+09	8.11471e+09	4.21143e+09	2.06019e+09
methyl 2-cyano-3-{1-[3-(1H-imidazol-1-yl)propyl]-1H-pyrrol-2-yl}acrylate	8.79605e+08	6.40937e+08	1.52747e+09	6.13295e+08	1.57614e+09	1.37153e+09	6.95612e+08	2.36207e+09	1.30859e+09	1.60541e+09	1.88475e+09	2.06287e+09	1.04664e+09	8.6406e+08	1.10247e+09	1.62718e+09	5.09188e+08	2.47904e+09	2.56818e+08	1.65585e+09	5.55988e+08	9.1815e+08	5.05593e+08	9.29896e+08	2.99261e+08	1.90069e+09	6.46128e+08	1.34188e+09
methyl N-cyano-4-(5-nitropyridin-2-yl)tetrahydropyrazine-1(2H)-carbimidothioate	1.25653e+09	8.87691e+08	1.45157e+09	1.14389e+09	6.82444e+08	9.0305e+08	1.83377e+09	9.28225e+08	2.47633e+09	1.19213e+09	9.99784e+08	1.10803e+09	1.21324e+09	2.85462e+09	1.36619e+09	1.18102e+09	9.47869e+08	1.64269e+09	5.86379e+08	1.61902e+09	7.69184e+08	1.20084e+09	1.28129e+09	1.33204e+09	1.54518e+09	1.23995e+09	1.51426e+09	1.11801e+09
o-Toluidine	5.25101e+08	1.23862e+09	9.88812e+08	5.73169e+08	6.30271e+08	6.37992e+08	5.42886e+08	1.09827e+09	7.16603e+08	1.06883e+09	6.11384e+08	6.19473e+08	5.16344e+08	6.33934e+08	1.47403e+09	6.02761e+08	8.10749e+08	9.18287e+08	5.61233e+08	1.09087e+09	1.00867e+09	1.31906e+09	2.42308e+08	1.0541e+09	4.64375e+08	1.1194e+09	4.50181e+08	5.55661e+08
quinoxaline-2,3-diol	1.26168e+08	1.38458e+08	1.32795e+08	1.39862e+08	1.38633e+08	1.36219e+08	1.21579e+08	1.61949e+08	1.44515e+08	1.49751e+08	1.16879e+08	1.26574e+08	1.07108e+08	1.24944e+08	1.41677e+08	1.36089e+08	1.03606e+08	1.09221e+08	1.5315e+08	1.16694e+08	9.62182e+07	1.13974e+08	1.02747e+08	1.04909e+08	9.96374e+07	1.38207e+08	1.34781e+08	1.48582e+08
tert-Butyl N-[1-(aminocarbonyl)-3-methylbutyl]carbamate	9.47948e+09	2.80313e+10	7.21632e+09	1.94014e+10	4.93991e+10	2.5821e+10	2.23702e+10	2.98955e+10	1.56164e+10	4.56927e+10	2.87617e+10	6.21313e+10	8.75523e+09	2.05595e+10	1.14948e+10	2.84015e+10	6.39786e+09	1.38532e+10	2.71519e+10	2.91561e+09	9.48609e+09	5.48267e+09	6.93671e+09	5.93953e+09	3.90285e+09	1.266e+10	3.98895e+10	3.56381e+10
trans-10-Heptadecenoic acid	2.64886e+09	3.11209e+09	2.15747e+09	2.41386e+09	2.71216e+09	2.86103e+09	2.3762e+09	2.10575e+09	2.09214e+09	2.31205e+09	3.18328e+09	2.50016e+09	3.99763e+09	2.85121e+09	5.95462e+09	3.40884e+09	5.1818e+09	6.84776e+09	3.0893e+09	2.3413e+09	6.29121e+09	5.06476e+09	2.33399e+09	2.70711e+09	2.59619e+09	2.46665e+09	2.48022e+09	4.50294e+09
trans-3-Indoleacrylic acid	4.24291e+11	3.04802e+11	3.94154e+11	3.32671e+11	2.4553e+11	1.91097e+11	1.96968e+11	2.14597e+11	3.34905e+11	2.4227e+11	1.83407e+11	2.1044e+11	5.88992e+10	3.37051e+11	3.58286e+11	3.59196e+11	1.26592e+11	8.69386e+10	3.30532e+09	5.3497e+10	7.10608e+10	6.20666e+10	1.18353e+11	6.28161e+10	6.14214e+10	3.90657e+11	2.7489e+11	3.57845e+11
trans-Cinnamic acid	3.33142e+09	8.71444e+09	1.96119e+09	3.76233e+09	9.17858e+09	1.80394e+10	6.74586e+09	1.0557e+10	6.30283e+09	3.40151e+09	3.63161e+09	4.92729e+09	1.08492e+09	3.86103e+09	4.0897e+09	5.73366e+09	2.43107e+09	8.05054e+09	4.95727e+09	1.31072e+09	1.08736e+10	1.78361e+09	3.29208e+09	2.01712e+09	1.08213e+09	5.87239e+09	6.61342e+09	5.06383e+09
trans-Petroselinic acid	2.62472e+10	1.87984e+10	2.7047e+10	1.71172e+10	1.63607e+10	1.80443e+10	1.59303e+10	1.55098e+10	2.20959e+10	2.24081e+10	2.51999e+10	2.17875e+10	2.37504e+10	1.97694e+10	1.61237e+10	2.45896e+10	1.97889e+10	1.93726e+10	1.69473e+10	2.15272e+10	2.49058e+10	1.88949e+10	2.06633e+10	2.07838e+10	1.94646e+10	2.5811e+10	1.4926e+10	1.39276e+10
{(2R,4S,5R)-5-[1-Methyl-3-(2-thienyl)-1H-pyrazol-5-yl]-1-azabicyclo[2.2.2]oct-2-yl}methyl isopropylcarbamate	3.64121e+07	3.6011e+07	7.41123e+07	6.56642e+07	7.39232e+07	1.19468e+08	5.13678e+07	8.71449e+07	4.55173e+07	3.77238e+07	4.16522e+07	3.18621e+07	5.12302e+07	4.16089e+07	9.27551e+07	6.562e+07	2.77225e+07	6.61697e+07	8.10118e+07	3.49544e+07	7.28955e+07	8.15059e+07	2.85169e+07	2.77409e+07	3.63596e+07	6.34389e+07	3.51566e+07	3.26005e+07
{(3S)-3-[5-(1-Methyl-1H-imidazol-5-yl)-1,3,4-oxadiazol-2-yl]-1-pyrrolidinyl}(4-pyridinyl)methanone	5.28772e+08	1.4276e+09	2.78079e+08	1.09343e+08	1.8514e+09	4.42972e+08	1.50068e+09	2.25651e+09	4.59523e+08	5.51978e+08	2.53655e+08	3.33653e+09	7.78719e+07	7.25216e+07	3.8432e+08	7.26595e+07	7.02318e+08	3.57959e+08	1.91965e+09	4.07147e+08	2.8549e+08	6.3887e+07	3.60596e+08	5.77225e+08	9.41014e+07	7.43822e+07	3.4057e+08	7.01707e+08
{[(3-chloro-4-fluoroanilino)(imino)methyl]amino}methanimidamide hydrochloride	3.36965e+08	5.50337e+08	5.18868e+08	1.14667e+09	6.61043e+08	7.181e+08	8.60539e+08	8.08895e+08	3.74688e+08	6.65205e+08	6.66943e+08	9.00366e+08	5.11031e+08	3.45307e+08	5.79667e+08	4.87671e+08	4.88912e+08	6.86773e+08	9.06199e+08	3.53358e+08	6.53122e+08	4.28371e+08	6.06106e+08	7.25704e+08	2.81524e+08	4.88948e+08	3.52105e+08	6.20691e+08
Aminobutyric acid (GABA)	1.49224e+09	1.12705e+09	1.90465e+09	1.94106e+09	1.6518e+09	1.35158e+09	1.45436e+09	2.68312e+09	2.73933e+09	1.64393e+09	3.32426e+09	2.49046e+09	2.5643e+09	3.44075e+09	3.0987e+09	2.6493e+09	3.99392e+09	2.01173e+09	1.24566e+09	1.96802e+09	1.18538e+09	2.29169e+09	1.1117e+09	1.62237e+09	1.98579e+09	2.60923e+09	2.29377e+09	2.4083e+09
Aspartylphenylalanine	1.68325e+09	7.24502e+08	6.77963e+09	1.01808e+09	1.13713e+09	9.70552e+08	7.16062e+08	3.38373e+08	6.94219e+08	7.52787e+08	1.09334e+08	6.3678e+08	1.67145e+08	4.89082e+08	6.26268e+08	1.27995e+09	4.90456e+08	1.67609e+08	7.15975e+08	7.78829e+07	2.50284e+08	1.80655e+08	4.31643e+08	1.70088e+08	8.95886e+07	4.73777e+08	1.53091e+09	3.5446e+08
Cyano-3-hydroxycinnamic acid	9.20273e+08	1.20138e+09	1.25078e+09	3.08916e+09	1.37828e+09	1.15425e+09	9.96785e+08	1.6975e+09	1.06098e+09	2.7199e+09	2.64577e+09	1.64755e+09	3.41281e+09	2.54623e+09	2.7551e+09	1.47409e+09	1.82882e+09	2.57037e+09	1.86404e+09	1.62395e+09	2.10858e+09	1.30528e+09	1.16922e+09	2.50165e+09	8.6788e+08	2.10829e+09	1.24329e+09	1.51562e+09
Eleostearic acid	4.09106e+10	4.71723e+10	4.32631e+10	4.15465e+10	3.86026e+10	4.119e+10	3.68211e+10	3.53512e+10	3.97001e+10	4.0235e+10	3.99979e+10	3.75865e+10	4.22332e+10	3.89599e+10	3.52185e+10	4.48751e+10	3.25813e+10	4.81551e+10	4.19003e+10	4.17838e+10	4.44847e+10	4.19017e+10	3.97075e+10	3.4881e+10	2.15743e+10	5.11571e+10	3.79112e+10	2.50485e+10
Lactose	7.16115e+08	6.85485e+08	7.88397e+08	7.55596e+08	5.92553e+08	7.21556e+08	1.29058e+09	8.64316e+08	6.45425e+08	1.28518e+09	6.27037e+08	6.56077e+08	7.76866e+08	1.05774e+09	1.10755e+09	5.05948e+08	1.43835e+09	1.03358e+09	6.06145e+08	8.14697e+08	9.74488e+08	8.85792e+08	8.31886e+08	7.73582e+08	9.58203e+08	3.5947e+08	7.92573e+08	6.77661e+08
Linolenoyl ethanolamide	5.95141e+08	3.71382e+08	4.41059e+08	4.38477e+08	3.01162e+08	4.1377e+08	4.33926e+08	5.62706e+08	2.87582e+08	4.46687e+08	4.23746e+08	5.4557e+08	4.24997e+08	4.87056e+08	4.40028e+08	4.48819e+08	6.93842e+08	5.26297e+08	3.30109e+08	4.13282e+08	4.64367e+08	5.39599e+08	3.82477e+08	2.65185e+08	4.18763e+08	2.85557e+08	4.31692e+08	3.83494e+08
Propylaminopentiophenone	3.29086e+08	3.39441e+08	5.7239e+08	4.4137e+08	6.88401e+08	4.43758e+08	5.27272e+08	5.35402e+08	6.84035e+08	4.82454e+08	3.57937e+08	4.12226e+08	6.21868e+08	3.1559e+08	4.58447e+08	2.05564e+08	3.77635e+08	4.88811e+08	3.76427e+08	6.35445e+08	6.49034e+08	6.26618e+08	5.46029e+08	6.82696e+08	5.66607e+08	3.96509e+08	3.59608e+08	4.64649e+08
Pyrrolidinobutiophenone	5.63546e+08	5.11558e+08	1.05823e+09	8.1802e+08	7.05007e+08	7.40445e+08	6.69329e+08	6.73442e+08	6.23466e+08	1.03154e+09	7.40805e+08	4.96511e+08	1.30442e+09	4.34506e+08	5.86247e+08	7.87953e+08	6.13594e+08	4.84598e+08	6.28601e+08	7.82852e+08	8.34107e+08	1.06808e+09	5.07294e+08	8.36912e+08	5.57181e+08	7.47567e+08	5.95845e+08	4.92585e+08
Pyrrolidinovalerophenone	3.13422e+08	2.3202e+08	1.94529e+08	2.65145e+08	2.32384e+08	2.40832e+08	1.03801e+08	1.57758e+08	2.76718e+08	2.66833e+08	2.41004e+08	2.92158e+08	3.25729e+08	2.46877e+08	2.54672e+08	3.24579e+08	2.3076e+08	3.12088e+08	1.23794e+08	2.03829e+08	2.97348e+08	2.61524e+08	2.60578e+08	2.69241e+08	2.60053e+08	1.69269e+08	2.13716e+08	2.01851e+08
Alanine	1.65988e+10	1.89533e+10	1.59654e+10	1.81079e+10	1.53868e+10	1.89275e+10	1.2919e+10	1.54763e+10	1.95705e+10	2.08954e+10	1.23874e+10	2.29014e+10	7.89017e+09	3.10628e+10	2.07201e+10	2.60375e+10	8.80819e+09	7.47805e+09	1.30521e+10	6.4428e+09	9.64193e+09	6.01517e+09	6.74802e+09	9.21014e+09	7.20263e+09	2.5039e+10	1.96652e+10	2.90331e+10
Estradiol-17-glucuronide	7.0213e+07	1.37867e+08	6.47487e+07	5.19087e+07	1.15223e+08	5.48161e+07	1.57195e+07	3.83267e+07	7.40266e+07	1.13516e+07	2.0768e+08	9.62869e+07	2.94504e+08	1.07307e+08	7.79003e+07	1.2111e+08	1.3272e+08	1.39984e+08	2.11372e+08	5.96431e+07	1.6327e+08	1.36503e+08	2.62724e+08	7.53168e+07	6.92671e+08	2.41227e+08	4.08708e+08	1.17542e+08
Hydroxythiofentanyl	5.98161e+09	4.48058e+09	1.01724e+10	3.59032e+09	4.87802e+09	5.92124e+09	4.10087e+09	3.93877e+09	8.20001e+09	1.13805e+10	7.58262e+09	6.08346e+09	1.07599e+10	1.02065e+10	7.8761e+09	7.70746e+09	5.63206e+09	8.29698e+09	8.03498e+09	6.40416e+09	6.78138e+09	6.86991e+09	7.70094e+09	8.49801e+09	8.62277e+09	1.03593e+10	1.23689e+10	1.55566e+10
Muricholic acid	3.50116e+10	4.07477e+10	6.64456e+10	5.08144e+10	5.11024e+10	3.97496e+10	4.52546e+10	5.21728e+10	5.01535e+10	4.23228e+10	4.21879e+10	4.50473e+10	5.33319e+10	3.16914e+10	3.49161e+10	5.98766e+10	4.89746e+10	1.12243e+10	4.73121e+10	5.11909e+10	3.11793e+10	6.24326e+10	3.91454e+10	5.52866e+10	4.68877e+10	3.96005e+10	1.72341e+10	3.1978e+10

## Sheet: Figure6
Linoleic acid				Linolenic acid				8,11,14-Eicosatrienoic acid
FR	ABA	ABA+P		FR	ABA	ABA+P		FR	ABA	ABA+P
2.02882	0.900291	1.72662		0.14599	0.0730547	0.119662		0.0981342	0.0215222	0.0523582
2.03767	1.40026	1.8194		0.146121	0.0976218	0.128178		0.103777	0.0382087	0.0603001
2.2446	1.5344	1.83858		0.159807	0.0994055	0.142877		0.110803	0.0426306	0.0690972
2.43869	1.72812	2.11356		0.165367	0.110416	0.149912		0.113489	0.0526906	0.100278
2.49931	1.7602	2.41955		0.180775	0.118126	0.163139		0.121604	0.0553567	0.127685
2.64532	2.06596	2.47648		0.182784	0.128656	0.166982		0.179317	0.0628867	0.127896
2.78295	2.09863	2.5275		0.21797	0.132959	0.219531		0.194555	0.0842915	0.139363
2.88365	2.16837	3.1762		0.245588	0.150121	0.228214		0.215784	0.0856837	0.17584
Arachidonic acid				Docosahexaenoic acid				PUFA
FR	ABA	ABA+P		FR	ABA	ABA+P		FR	ABA	ABA+P
0.166456	0.064168	0.134441		0.145049	0.071659	0.129716		0.33718	0.244799	0.31539
0.197108	0.069611	0.151962		0.147348	0.090368	0.132751		0.348853	0.291635	0.323619
0.21794	0.072307	0.173128		0.161788	0.107152	0.145392		0.355056	0.297015	0.323682
0.221728	0.083098	0.243996		0.180152	0.119397	0.172235		0.360068	0.298584	0.336036
0.306708	0.127026	0.263645		0.186263	0.133486	0.183518		0.363372	0.306842	0.336682
0.330623	0.132182	0.265137		0.204792	0.138085	0.231112		0.390464	0.322256	0.337691
0.332722	0.157703	0.364645		0.221078	0.153912	0.289958		0.437099	0.335012	0.355086
0.41428	0.184399			0.249688	0.16168			0.471234	0.342366	0.445931

## Sheet: RNA-seq Probiotic60vspbs60
Gene_id	Gene name	Gene description	FC(Prob_60min/Blank_60min)	Log2FC(Prob_60min/Blank_60min)	Pvalue	Padjust	Significant	Regulate	P60_1	P60_2	P60_3	K60_1	K60_2	K60_3	Prob_60min	Blank_60min
ENSMUSG00000000126	Wnt9a	wingless-type MMTV integration site family, member 9A [Source:MGI Symbol;Acc:MGI:2446084]	21.9766	4.4579	0.0153512	1	yes	up	0.04	0.04	0.15	0	0	0	0.0766667	0
ENSMUSG00000001504	Irx2	Iroquois homeobox 2 [Source:MGI Symbol;Acc:MGI:1197526]	9.94164	3.31348	0.0243478	1	yes	up	0.1	0.34	0.32	0.36	0	0	0.253333	0.12
ENSMUSG00000002578	Ikzf4	IKAROS family zinc finger 4 [Source:MGI Symbol;Acc:MGI:1343139]	4.27842	2.09708	0.0239486	1	yes	up	0.09	0.13	0.15	0.03	0.04	0.03	0.123333	0.0333333
ENSMUSG00000004552	Ctse	cathepsin E [Source:MGI Symbol;Acc:MGI:107361]	0.400731	-1.31929	6.22e-05	0.00592575	yes	down	1.18	1.19	1.31	1.68	2.65	4.37	1.22667	2.9
ENSMUSG00000005681	Apoa2	apolipoprotein A-II [Source:MGI Symbol;Acc:MGI:88050]	0.469003	-1.09233	0.0144736	0.191559	yes	down	7.48	3	6.21	5.81	15.23	11.15	5.56333	10.73
ENSMUSG00000009633	G0s2	G0/G1 switch gene 2 [Source:MGI Symbol;Acc:MGI:1316737]	2.36255	1.24034	4.49e-06	0.000800791	yes	up	11.39	11.32	10.11	5.49	2.83	4.52	10.94	4.28
ENSMUSG00000013338	Fer1l4	fer-1-like 4 (C. elegans) [Source:MGI Symbol;Acc:MGI:1921812]	0.44586	-1.16534	0.00433417	0.096288	yes	down	0.25	0.33	0.29	0.29	1	0.92	0.29	0.736667
ENSMUSG00000016283	H2-M2	histocompatibility 2, M region locus 2 [Source:MGI Symbol;Acc:MGI:95914]	0.283851	-1.8168	0.00583593	1	yes	down	0.32	0.25	0.26	0.59	0.92	1.38	0.276667	0.963333
ENSMUSG00000018916	Csf2	colony stimulating factor 2 (granulocyte-macrophage) [Source:MGI Symbol;Acc:MGI:1339752]	0.288123	-1.79524	0.0186672	1	yes	down	0.7	0.62	0.32	0.48	1.89	2.88	0.546667	1.75
ENSMUSG00000019970	Sgk1	serum/glucocorticoid regulated kinase 1 [Source:MGI Symbol;Acc:MGI:1340062]	0.471511	-1.08464	2.74e-05	0.00316314	yes	down	2.33	2.86	1.43	2.99	3.82	5.33	2.20667	4.04667
ENSMUSG00000020226	Slc5a4b	solute carrier family 5 (neutral amino acid transporters, system A), member 4b [Source:MGI Symbol;Acc:MGI:1890478]	0.376052	-1.411	1.51e-05	0.0020284	yes	down	1.47	0.49	0.8	1.71	2.71	2.6	0.92	2.34
ENSMUSG00000021319	Sfrp4	secreted frizzled-related protein 4 [Source:MGI Symbol;Acc:MGI:892010]	7.80518	2.96443	0.0499444	1	yes	up	0.18	0.13	0.16	0	0	0.07	0.156667	0.0233333
ENSMUSG00000021416	Eci3	enoyl-Coenzyme A delta isomerase 3 [Source:MGI Symbol;Acc:MGI:1916373]	0.42773	-1.22523	0.0055821	0.110785	yes	down	2.37	0.95	0.99	1.73	3.63	3.71	1.43667	3.02333
ENSMUSG00000021567	Nkd2	naked cuticle 2 [Source:MGI Symbol;Acc:MGI:1919543]	0.0934017	-3.42041	0.0476842	1	yes	down	0.14	0	0	0.06	0.07	0.11	0.0466667	0.08
ENSMUSG00000021575	Ahrr	aryl-hydrocarbon receptor repressor [Source:MGI Symbol;Acc:MGI:1333776]	2.89298	1.53256	0.0247556	1	yes	up	0.2	0.22	0.22	0.02	0.39	0.11	0.213333	0.173333
ENSMUSG00000022598	Psca	prostate stem cell antigen [Source:MGI Symbol;Acc:MGI:1919623]	0.436194	-1.19696	0.00335777	0.0826036	yes	down	3.56	4.07	2.02	2.92	6.97	10.5	3.21667	6.79667
ENSMUSG00000024032	Tff1	trefoil factor 1 [Source:MGI Symbol;Acc:MGI:88135]	0.254381	-1.97494	0.000410262	0.0209346	yes	down	11.3	11.6	11.91	16.36	44.58	68.52	11.6033	43.1533
ENSMUSG00000024354	Slc23a1	solute carrier family 23 (nucleobase transporters), member 1 [Source:MGI Symbol;Acc:MGI:1341903]	0.441978	-1.17795	0.00378888	0.0890183	yes	down	1.19	0.41	0.34	1.08	1.75	1.4	0.646667	1.41
ENSMUSG00000025243	Slc6a20b	solute carrier family 6 (neurotransmitter transporter), member 20B [Source:MGI Symbol;Acc:MGI:1336891]	0.403373	-1.30981	0.00238958	0.066038	yes	down	0.48	0.14	0.13	0.43	0.59	0.55	0.25	0.523333
ENSMUSG00000025726	Slc28a1	solute carrier family 28 (sodium-coupled nucleoside transporter), member 1 [Source:MGI Symbol;Acc:MGI:3605073]	0.232329	-2.10576	0.000326168	0.0182083	yes	down	0.32	0.17	0.09	0.29	1.2	0.9	0.193333	0.796667
ENSMUSG00000026166	Ccl20	chemokine (C-C motif) ligand 20 [Source:MGI Symbol;Acc:MGI:1329031]	0.444317	-1.17034	0.000380434	0.0197992	yes	down	23.38	29	25.88	35.85	54.54	76.19	26.0867	55.5267
ENSMUSG00000028539	Artn	artemin [Source:MGI Symbol;Acc:MGI:1333791]	3.77308	1.91574	0.00844172	1	yes	up	0.26	0.72	0.69	0.18	0.16	0.06	0.556667	0.133333
ENSMUSG00000029377	Ereg	epiregulin [Source:MGI Symbol;Acc:MGI:107508]	2.06119	1.04348	0.0445041	1	yes	up	0.34	0.39	0.27	0.16	0.15	0.15	0.333333	0.153333
ENSMUSG00000030708	Dnajb13	DnaJ heat shock protein family (Hsp40) member B13 [Source:MGI Symbol;Acc:MGI:1916637]	0.484074	-1.0467	0.00233573	0.0654436	yes	down	1.01	0.59	0.63	1.17	1.68	1.53	0.743333	1.46
ENSMUSG00000030769	Slc5a11	solute carrier family 5 (sodium/glucose cotransporter), member 11 [Source:MGI Symbol;Acc:MGI:1919316]	0.499765	-1.00068	0.00561262	0.110919	yes	down	3.89	1.53	1.16	1.78	3.72	5.09	2.19333	3.53
ENSMUSG00000030790	Adm	adrenomedullin [Source:MGI Symbol;Acc:MGI:108058]	2.15745	1.10932	1.85e-07	6.73e-05	yes	up	8.16	11.14	9.18	3.74	4.02	5.11	9.49333	4.29
ENSMUSG00000031425	Plp1	proteolipid protein (myelin) 1 [Source:MGI Symbol;Acc:MGI:97623]	2.04344	1.031	0.0441422	1	yes	up	0.98	0.94	0.51	0.16	0.44	0.26	0.81	0.286667
ENSMUSG00000031444	F10	coagulation factor X [Source:MGI Symbol;Acc:MGI:103107]	0.285142	-1.81025	0.0071875	1	yes	down	0.33	0.06	0.42	0.39	1.1	0.63	0.27	0.706667
ENSMUSG00000031480	Thsd1	thrombospondin, type I, domain 1 [Source:MGI Symbol;Acc:MGI:1929096]	0.30803	-1.69886	0.0214198	1	yes	down	0.06	0.1	0.04	0.17	0.16	0.36	0.0666667	0.23
ENSMUSG00000032372	Plscr2	phospholipid scramblase 2 [Source:MGI Symbol;Acc:MGI:1270860]	0.085599	-3.54626	0.0360323	1	yes	down	0	0.04	0	0.18	0.25	0.26	0.0133333	0.23
ENSMUSG00000032739	Pram1	PML-RAR alpha-regulated adaptor molecule 1 [Source:MGI Symbol;Acc:MGI:3576625]	0.289703	-1.78735	0.0256899	1	yes	down	0.2	0.13	0.09	0.54	0.41	0.28	0.14	0.41
ENSMUSG00000033863	Klf9	Kruppel-like factor 9 [Source:MGI Symbol;Acc:MGI:1333856]	2.15896	1.11033	6.94e-07	0.000197076	yes	up	1.64	2.45	2.3	0.79	1.06	0.95	2.13	0.933333
ENSMUSG00000034168	Irf2bpl	interferon regulatory factor 2 binding protein-like [Source:MGI Symbol;Acc:MGI:2442463]	2.51872	1.33269	3.29e-24	2.15e-20	yes	up	11.39	15.14	16.2	5.29	4.76	5.97	14.2433	5.34
ENSMUSG00000036067	Slc2a6	solute carrier family 2 (facilitated glucose transporter), member 6 [Source:MGI Symbol;Acc:MGI:2443286]	2.75735	1.46328	0.0465374	1	yes	up	0.31	0.3	0.37	0.16	0.11	0.34	0.326667	0.203333
ENSMUSG00000036492	Rnf39	ring finger protein 39 [Source:MGI Symbol;Acc:MGI:2156378]	2.42001	1.27501	9.39e-05	0.008014	yes	up	2.53	4.45	3.71	0.89	1.38	1.4	3.56333	1.22333
ENSMUSG00000037188	Grhl3	grainyhead like transcription factor 3 [Source:MGI Symbol;Acc:MGI:2655333]	2.32546	1.21751	0.0079204	0.133929	yes	up	0.55	0.84	0.86	0.4	0.3	0.21	0.75	0.303333
ENSMUSG00000037797	Adh4	alcohol dehydrogenase 4 (class II), pi polypeptide [Source:MGI Symbol;Acc:MGI:1349472]	0.43537	-1.19968	2.37e-05	0.00283608	yes	down	3.08	2.31	2.21	5.98	9.14	5.79	2.53333	6.97
ENSMUSG00000038128	Camk4	calcium/calmodulin-dependent protein kinase IV [Source:MGI Symbol;Acc:MGI:88258]	0.308946	-1.69457	0.0426879	1	yes	down	0.1	0.13	0.02	0.21	0.24	0.31	0.0833333	0.253333
ENSMUSG00000038152	5033430I15Rik	RIKEN cDNA 5033430I15 gene [Source:MGI Symbol;Acc:MGI:1923250]	2.16241	1.11264	0.0454694	1	yes	up	0.71	1.03	2.05	0.72	1.03	1.56	1.26333	1.10333
ENSMUSG00000038704	Aspdh	aspartate dehydrogenase domain containing [Source:MGI Symbol;Acc:MGI:1915602]	0.463937	-1.108	0.0115332	0.167362	yes	down	3.84	1.58	1.99	2.54	5.96	4.45	2.47	4.31667
ENSMUSG00000039481	Nrtn	neurturin [Source:MGI Symbol;Acc:MGI:108417]	2.98711	1.57875	2.37e-07	8.17e-05	yes	up	8.61	6.14	6.68	2.69	1.71	2.3	7.14333	2.23333
ENSMUSG00000039556	Ppp1r3f	protein phosphatase 1, regulatory subunit 3F [Source:MGI Symbol;Acc:MGI:1859617]	2.61382	1.38616	0.0296653	1	yes	up	0.46	0.42	0.74	0.11	0.14	0.14	0.54	0.13
ENSMUSG00000039824	Myl6b	myosin, light polypeptide 6B [Source:MGI Symbol;Acc:MGI:1917789]	2.22634	1.15467	0.0156524	0.200367	yes	up	1.59	2.29	1.71	0.99	0.85	0.58	1.86333	0.806667
ENSMUSG00000042087	4933440N22Rik	RIKEN cDNA 4933440N22 gene [Source:MGI Symbol;Acc:MGI:1921721]	2.42789	1.2797	0.000135314	0.00998648	yes	up	3.23	2.16	1.96	1.18	0.91	0.8	2.45	0.963333
ENSMUSG00000043993	2900052L18Rik	RIKEN cDNA 2900052L18 gene [Source:MGI Symbol;Acc:MGI:1924085]	2.00689	1.00496	0.0070561	0.125774	yes	up	2.41	4.02	2.51	2.54	0.94	1.19	2.98	1.55667
ENSMUSG00000045455	Gm9797	predicted pseudogene 9797 [Source:MGI Symbol;Acc:MGI:3704349]	2.25693	1.17436	0.00440378	0.0970095	yes	up	54.34	70.49	65.82	55.54	64.25	45.75	63.55	55.18
ENSMUSG00000046229	Scand1	SCAN domain-containing 1 [Source:MGI Symbol;Acc:MGI:1343132]	4.62179	2.20845	3.92e-12	3.66e-09	yes	up	20.71	10.53	12.29	2.56	2.76	3.47	14.51	2.93
ENSMUSG00000047632	Fgfbp3	fibroblast growth factor binding protein 3 [Source:MGI Symbol;Acc:MGI:1919764]	2.30089	1.20219	0.003258	0.0809111	yes	up	1.54	1.86	1.36	0.85	0.51	0.58	1.58667	0.646667
ENSMUSG00000049866	Arl4c	ADP-ribosylation factor-like 4C [Source:MGI Symbol;Acc:MGI:2445172]	2.34391	1.22892	0.00884608	0.142339	yes	up	0.32	0.82	0.54	0.31	0.16	0.2	0.56	0.223333
ENSMUSG00000050395	Tnfsf15	tumor necrosis factor (ligand) superfamily, member 15 [Source:MGI Symbol;Acc:MGI:2180140]	0.368167	-1.44157	1.47e-06	0.000337639	yes	down	0.3	0.51	0.37	0.76	1.05	1.08	0.393333	0.963333
ENSMUSG00000051246	Msantd1	Myb/SANT-like DNA-binding domain containing 1 [Source:MGI Symbol;Acc:MGI:2684990]	0.387581	-1.36743	0.0385199	1	yes	down	0.74	0.51	0.44	0.89	0.96	1	0.563333	0.95
ENSMUSG00000051639	Fbl-ps2	fibrillarin, pseudogene 2 [Source:MGI Symbol;Acc:MGI:3644887]	0.409268	-1.28888	0.00743527	0.129849	yes	down	0.52	2.44	1.12	2.98	2.31	3.96	1.36	3.08333
ENSMUSG00000052565	H1f3	H1.3 linker histone, cluster member [Source:MGI Symbol;Acc:MGI:107502]	2.02831	1.02028	0.0136832	0.185035	yes	up	0.22	0.62	0.43	0.25	0.11	0.22	0.423333	0.193333
ENSMUSG00000053093	Myh7	myosin, heavy polypeptide 7, cardiac muscle, beta [Source:MGI Symbol;Acc:MGI:2155600]	0.478108	-1.06459	0.00666993	0.121844	yes	down	0.36	0.56	0.11	0.89	1.09	0.57	0.343333	0.85
ENSMUSG00000053706	B430305J03Rik	RIKEN cDNA B430305J03 gene [Source:MGI Symbol;Acc:MGI:3697707]	9.37968	3.22954	7.51e-05	1	yes	up	0.36	0.72	0.19	0	0.11	0.02	0.423333	0.0433333
ENSMUSG00000054716	Zfp771	zinc finger protein 771 [Source:MGI Symbol;Acc:MGI:2442050]	3.36282	1.74967	2.32e-10	1.52e-07	yes	up	8.66	5.96	6.06	1.91	1.82	2.58	6.89333	2.10333
ENSMUSG00000056412	Psenen-ps	presenilin enhancer gamma secretase subunit, pseudogene [Source:MGI Symbol;Acc:MGI:3649201]	0.176249	-2.50431	0.000324581	1	yes	down	15.59	4.51	0	38.6	19.68	30.92	6.7	29.7333
ENSMUSG00000057132	Rpgrip1	retinitis pigmentosa GTPase regulator interacting protein 1 [Source:MGI Symbol;Acc:MGI:1932134]	0.400365	-1.32061	0.00118378	0.0417937	yes	down	2.49	0.91	0.33	3.36	2.81	2.63	1.24333	2.93333
ENSMUSG00000058070	Eml1	echinoderm microtubule associated protein like 1 [Source:MGI Symbol;Acc:MGI:1915769]	0.342074	-1.54762	0.0491479	1	yes	down	0.11	0.15	0.08	0.1	0.32	0.51	0.113333	0.31
ENSMUSG00000058385	H2bc8	H2B clustered histone 8 [Source:MGI Symbol;Acc:MGI:2448386]	2.97854	1.5746	4.13e-05	0.00437517	yes	up	7.61	18.16	14.14	6.13	2.26	3.58	13.3033	3.99
ENSMUSG00000059195	Gm12715	predicted gene 12715 [Source:MGI Symbol;Acc:MGI:3650759]	0.0527672	-4.24422	0.0218776	1	yes	down	0	0	0	0.31	0.19	0.17	0	0.223333
ENSMUSG00000059654	Reg1	regenerating islet-derived 1 [Source:MGI Symbol;Acc:MGI:97895]	0.395095	-1.33973	0.023864	0.249389	yes	down	239.13	97.7	97.88	199.65	393.18	437.01	144.903	343.28
ENSMUSG00000059991	Nptx2	neuronal pentraxin 2 [Source:MGI Symbol;Acc:MGI:1858209]	2.34703	1.23083	0.0270941	1	yes	up	0.42	0.8	0.57	0.24	0.36	0.12	0.596667	0.24
ENSMUSG00000063160	Numbl	numb-like [Source:MGI Symbol;Acc:MGI:894702]	2.1156	1.08107	0.0461855	1	yes	up	0.33	0.35	0.42	0.11	0.28	0.59	0.366667	0.326667
ENSMUSG00000064140	Trim38	tripartite motif-containing 38 [Source:MGI Symbol;Acc:MGI:2684869]	0.442499	-1.17625	0.00502047	0.1051	yes	down	1.29	0.47	0.62	1.17	2.44	2.08	0.793333	1.89667
ENSMUSG00000066072	Cyp4a10	cytochrome P450, family 4, subfamily a, polypeptide 10 [Source:MGI Symbol;Acc:MGI:88611]	0.485507	-1.04244	0.0315393	0.287546	yes	down	0.55	0.36	0.35	0.72	0.73	1.02	0.42	0.823333
ENSMUSG00000066315	Gm12918	predicted gene 12918 [Source:MGI Symbol;Acc:MGI:3652005]	0.000162414	-12.588	6.88e-25	8.99e-21	yes	down	0	0.01	0	139.75	235.64	156.33	0.00333333	177.24
ENSMUSG00000067297	Ifit1bl2	interferon induced protein with tetratricopeptide repeats 1B like 2 [Source:MGI Symbol;Acc:MGI:2148249]	0.271045	-1.8834	4.84e-10	2.63e-07	yes	down	8.86	7.84	6.41	18.71	27.56	34.59	7.70333	26.9533
ENSMUSG00000068397	Gm10240	predicted gene 10240 [Source:MGI Symbol;Acc:MGI:3704454]	0.421254	-1.24724	0.00376915	0.0887423	yes	down	41.53	54.82	18.31	91.89	65.75	80.14	38.22	79.26
ENSMUSG00000069270	H2ac6	H2A clustered histone 6 [Source:MGI Symbol;Acc:MGI:2448287]	3.64828	1.86722	0.000419316	0.0210674	yes	up	0.49	1.7	1.01	0.39	0.11	0.32	1.06667	0.273333
ENSMUSG00000071478	H2ac7	H2A clustered histone 7 [Source:MGI Symbol;Acc:MGI:2448289]	3.62768	1.85905	0.0284146	1	yes	up	2.68	3.25	1.35	1.01	0.57	0.2	2.42667	0.593333
ENSMUSG00000072244	Trim6	tripartite motif-containing 6 [Source:MGI Symbol;Acc:MGI:2137352]	2.59042	1.37319	0.0197714	1	yes	up	0.28	0.81	0.41	0.2	0.08	0.11	0.5	0.13
ENSMUSG00000072612	Gm10382	predicted gene 10382 [Source:MGI Symbol;Acc:MGI:3647829]	2.94718	1.55934	1.13e-06	0.000288692	yes	up	11.93	5.62	6.9	2.36	1.82	3.65	8.15	2.61
ENSMUSG00000072688	Gm10399	predicted gene 10399 [Source:MGI Symbol;Acc:MGI:3704255]	6.32229	2.66045	0.00714316	1	yes	up	1.8	1.37	1.1	0.21	0.26	0.49	1.42333	0.32
ENSMUSG00000073408	Mucl3	mucin like 3 [Source:MGI Symbol;Acc:MGI:2685476]	0.283205	-1.82008	0.00918586	0.144921	yes	down	0.69	1.07	1.29	0.99	3.87	5.21	1.01667	3.35667
ENSMUSG00000074210	E130208F15Rik	RIKEN cDNA E130208F15 gene [Source:MGI Symbol;Acc:MGI:3767226]	333.746	8.38261	2.2e-11	1.8e-08	yes	up	3.74	1.48	1.93	0	0	0	2.38333	0
ENSMUSG00000074506	Gm10705	predicted gene 10705 [Source:MGI Symbol;Acc:MGI:3708678]	0.478068	-1.06471	0.00567902	0.111725	yes	down	6.78	10.06	28.2	28.11	22.49	33.62	15.0133	28.0733
ENSMUSG00000074580	4931440P22Rik	RIKEN cDNA 4931440P22 gene [Source:MGI Symbol;Acc:MGI:1918254]	2.01474	1.01059	0.0465907	1	yes	up	0.88	0.91	0.81	0.39	0.52	0.95	0.866667	0.62
ENSMUSG00000074639	Rdh16f2	RDH16 family member 2 [Source:MGI Symbol;Acc:MGI:3583955]	0.396763	-1.33365	0.0447858	1	yes	down	0.61	0.32	0.23	0.61	0.94	1.19	0.386667	0.913333
ENSMUSG00000074896	Ifit3	interferon-induced protein with tetratricopeptide repeats 3 [Source:MGI Symbol;Acc:MGI:1101055]	0.47707	-1.06773	0.0350533	0.300855	yes	down	0.42	0.67	0.65	0.85	1.91	0.64	0.58	1.13333
ENSMUSG00000075296	Aldh3b2	aldehyde dehydrogenase 3 family, member B2 [Source:MGI Symbol;Acc:MGI:2147613]	0.190995	-2.3884	0.0467454	1	yes	down	0.03	0	0.09	0.11	0.34	0.17	0.04	0.206667
ENSMUSG00000076138	Gm26377	predicted gene, 26377 [Source:MGI Symbol;Acc:MGI:5456154]	0.352226	-1.50543	0.0137418	1	yes	down	0	0	0	0	0	0	0	0
ENSMUSG00000079165	Sap25	sin3 associated polypeptide [Source:MGI Symbol;Acc:MGI:3802945]	0.484674	-1.04491	0.00664706	0.121677	yes	down	1.79	4.59	2.66	3.68	6.03	5.54	3.01333	5.08333
ENSMUSG00000079516	Reg3a	regenerating islet-derived 3 alpha [Source:MGI Symbol;Acc:MGI:109408]	0.45377	-1.13997	0.0140405	0.188253	yes	down	36.48	19	16.81	33.31	54.02	61.77	24.0967	49.7
ENSMUSG00000079710	Dynlt2a2	dynein light chain Tctex-type 2A2 [Source:MGI Symbol;Acc:MGI:3809205]	2.26556	1.17987	0.0102335	0.155442	yes	up	0.85	1.31	1.06	0.36	1.13	0.24	1.07333	0.576667
ENSMUSG00000081022	Gm15936	predicted gene 15936 [Source:MGI Symbol;Acc:MGI:3802030]	0.246785	-2.01867	0.0454723	1	yes	down	1.06	0.38	0.62	1.36	3.47	2.64	0.686667	2.49
ENSMUSG00000081344	Gm14303	predicted gene 14303 [Source:MGI Symbol;Acc:MGI:3651379]	0.408941	-1.29004	0.000140784	0.010217	yes	down	1489.34	484	1263.83	1448.23	1809.4	1660.7	1079.06	1639.44
ENSMUSG00000081738	Hmgb1-ps2	high mobility group box 1, pseudogene 2 [Source:MGI Symbol;Acc:MGI:3768537]	5.74659	2.52271	0.0364556	1	yes	up	0.77	1.61	1.54	0	0.64	0	1.30667	0.213333
ENSMUSG00000082016	Pgam1-ps2	phosphoglycerate mutase 1, pseudogene 2 [Source:MGI Symbol;Acc:MGI:3645709]	518.134	9.01718	0.0210256	0.234186	yes	up	0	24.9	10.35	0	0	0	11.75	0
ENSMUSG00000082381	Gm12928	predicted gene 12928 [Source:MGI Symbol;Acc:MGI:3652022]	23.1805	4.53484	0.0127409	1	yes	up	1.67	0.44	0.3	0	0	0	0.803333	0
ENSMUSG00000082908	Gm13736	predicted gene 13736 [Source:MGI Symbol;Acc:MGI:3650137]	0.491139	-1.0258	0.022165	0.241145	yes	down	36.99	72.81	48.9	76.55	82.63	65.76	52.9	74.98
ENSMUSG00000083170	Gm14405	predicted gene 14405 [Source:MGI Symbol;Acc:MGI:3649815]	0.0264799	-5.23896	0.000785402	1	yes	down	0	0	0	0.27	0.17	0.13	0	0.19
ENSMUSG00000083396	Gm15542	predicted gene 15542 [Source:MGI Symbol;Acc:MGI:3782990]	2.16792	1.11631	0.00881835	0.142215	yes	up	2.55	4.27	2.11	1.06	2.06	0.75	2.97667	1.29
ENSMUSG00000083813	Gm15502	predicted gene 15502 [Source:MGI Symbol;Acc:MGI:3782949]	0.0809791	-3.62631	0.0308446	1	yes	down	0	11.75	0	38.77	24.57	18.62	3.91667	27.32
ENSMUSG00000084838	Gm10241	predicted pseudogene 10241 [Source:MGI Symbol;Acc:MGI:3704461]	20.4277	4.35245	0.0101125	1	yes	up	7.96	0	29.46	0	1.4	0	12.4733	0.466667
ENSMUSG00000085017	Gm13412	predicted gene 13412 [Source:MGI Symbol;Acc:MGI:3650612]	3.164	1.66175	0.0321208	1	yes	up	2.01	2.12	1.41	0.75	0.58	0.27	1.84667	0.533333
ENSMUSG00000085595	Gm16090	predicted gene 16090 [Source:MGI Symbol;Acc:MGI:3801885]	2.7021	1.43408	0.0216513	1	yes	up	0.9	1.31	0.68	0.54	0.46	0.04	0.963333	0.346667
ENSMUSG00000085787	Gm13092	predicted gene 13092 [Source:MGI Symbol;Acc:MGI:3649661]	0.207238	-2.27064	0.00263042	1	yes	down	0	14.35	24.6	78.11	42.35	21.13	12.9833	47.1967
ENSMUSG00000085887	Arhgap27os3	Rho GTPase activating protein 27, opposite strand 3 [Source:MGI Symbol;Acc:MGI:3650159]	2.05313	1.03782	0.0381566	0.314275	yes	up	0.56	1.22	0.39	0.33	0.35	0.31	0.723333	0.33
ENSMUSG00000085917	Gm15899	predicted gene 15899 [Source:MGI Symbol;Acc:MGI:3801945]	11.1989	3.48528	0.0243209	1	yes	up	48.56	62.19	1.06	0	0	5.66	37.27	1.88667
ENSMUSG00000086216	Gm13610	predicted gene 13610 [Source:MGI Symbol;Acc:MGI:3651297]	5.95454	2.57399	0.00618741	1	yes	up	1.67	0.77	1.49	0.56	0	0	1.31	0.186667
ENSMUSG00000086384	Banf2os	barrier to autointegration factor 2, opposite strand [Source:MGI Symbol;Acc:MGI:3650982]	0.0516425	-4.2753	0.0203575	1	yes	down	0	0	0	0.64	0.59	0.69	0	0.64
ENSMUSG00000089766	Gm16538	predicted gene 16538 [Source:MGI Symbol;Acc:MGI:4414958]	0.0631773	-3.98445	0.0421216	1	yes	down	0	0	0	0.1	0.19	0.22	0	0.17
ENSMUSG00000090062	Galnt6os	polypeptide N-acetylgalactosaminyltransferase 6, opposite strand [Source:MGI Symbol;Acc:MGI:1916281]	2.00499	1.00359	0.0486477	1	yes	up	1.64	2.57	1.45	1.33	0.59	0.58	1.88667	0.833333
ENSMUSG00000090171	Ugt1a2	UDP glucuronosyltransferase 1 family, polypeptide A2 [Source:MGI Symbol;Acc:MGI:3576049]	0.413094	-1.27546	0.000324003	0.0182083	yes	down	0.91	0.49	1.23	1.53	2.11	2.39	0.876667	2.01
ENSMUSG00000090381	Gm6158	predicted gene 6158 [Source:MGI Symbol;Acc:MGI:3779562]	0.135714	-2.88136	0.0283203	0.273025	yes	down	2.17	0	1.81	11.02	4.81	11.64	1.32667	9.15667
ENSMUSG00000090387	Gm17056	predicted gene 17056 [Source:MGI Symbol;Acc:MGI:4937883]	0.122106	-3.03379	0.0374772	1	yes	down	0.03	0.03	0	0.07	0.17	0.21	0.02	0.15
ENSMUSG00000090576	Gm17055	predicted gene 17055 [Source:MGI Symbol;Acc:MGI:4937882]	3.63977	1.86385	0.000530462	0.0244856	yes	up	0.73	1.03	0.63	0.34	0.17	0.13	0.796667	0.213333
ENSMUSG00000091172	Gm17120	predicted gene 17120 [Source:MGI Symbol;Acc:MGI:4937947]	0.323447	-1.6284	0.0129922	1	yes	down	0.96	0.67	0.46	2.19	1.86	1.99	0.696667	2.01333
ENSMUSG00000091471	Gm20538	predicted gene 20538 [Source:MGI Symbol;Acc:MGI:5142003]	12.6759	3.66401	0.0300449	1	yes	up	0.32	0.5	0.22	0.09	0	0	0.346667	0.03
ENSMUSG00000091623	Gm17092	predicted gene 17092 [Source:MGI Symbol;Acc:MGI:4937919]	3.24408	1.69781	0.00142552	0.0472629	yes	up	1.1	1.12	1.31	0.22	0.43	0.2	1.17667	0.283333
ENSMUSG00000091890	A830073O21Rik	RIKEN cDNA A830073O21 gene [Source:MGI Symbol;Acc:MGI:2443692]	2.50321	1.32378	0.00425634	0.0961413	yes	up	0.51	1.06	0.75	0.41	0.31	0.16	0.773333	0.293333
ENSMUSG00000092395	Gm20463	predicted gene 20463 [Source:MGI Symbol;Acc:MGI:5141928]	0.381107	-1.39173	0.0169145	0.206702	yes	down	9.96	0.79	13.75	27.16	14.15	15.21	8.16667	18.84
ENSMUSG00000093553	Gm20633	predicted gene 20633 [Source:MGI Symbol;Acc:MGI:5313080]	2.70289	1.4345	0.000110795	0.00882511	yes	up	1.2	1.32	1.14	0.56	0.4	0.29	1.22	0.416667
ENSMUSG00000093610	Cyp2c53-ps	cytochrome P450, family 2, subfamily c, polypeptide 53, pseudogene [Source:MGI Symbol;Acc:MGI:3646306]	15.1371	3.92001	0.0390657	1	yes	up	0.15	0.5	2.55	0	0	0.18	1.06667	0.06
ENSMUSG00000094328	Tdpoz9	TD and POZ domain containing 9 [Source:MGI Symbol;Acc:MGI:3702970]	2.00121	1.00087	0.0376031	0.311879	yes	up	0.56	1.45	0.89	0.64	0.24	0.48	0.966667	0.453333
ENSMUSG00000094627	Gm10182	predicted pseudogene 10182 [Source:MGI Symbol;Acc:MGI:3704327]	0.307538	-1.70117	0.000200928	0.0130583	yes	down	19.41	27.8	44.38	98.15	72.14	52.43	30.53	74.24
ENSMUSG00000094955	Gm3699	predicted gene 3699 [Source:MGI Symbol;Acc:MGI:3781875]	0.23305	-2.10129	0.0263775	1	yes	down	0	0	0	0	0	0	0	0
ENSMUSG00000095180	Rhox5	reproductive homeobox 5 [Source:MGI Symbol;Acc:MGI:97538]	2.3429	1.22829	0.0252594	1	yes	up	2.18	3.01	1.73	0.49	0.85	1.39	2.30667	0.91
ENSMUSG00000095562	Gm55594	predicted gene, 55594 [Source:MGI Symbol;Acc:MGI:6847656]	2.99011	1.5802	6.95e-06	0.00109758	yes	up	82.35	83.3	54.73	19.48	19.41	16.13	73.46	18.34
ENSMUSG00000095766	Gm21182	predicted gene, 21182 [Source:MGI Symbol;Acc:MGI:5434537]	0.253181	-1.98176	0.0302328	1	yes	down	0.47	0.49	0	1.66	0.88	0.91	0.32	1.15
ENSMUSG00000097078	Gm26566	predicted gene, 26566 [Source:MGI Symbol;Acc:MGI:5477060]	3.42093	1.77439	0.0311982	1	yes	up	0.51	1.64	0.76	0.25	0.18	0.35	0.97	0.26
ENSMUSG00000097185	Gm26596	predicted gene, 26596 [Source:MGI Symbol;Acc:MGI:5477090]	3.50133	1.8079	0.00456629	1	yes	up	0.64	0.39	0.48	0.09	0.23	0.1	0.503333	0.14
ENSMUSG00000097559	D430018E03Rik	RIKEN cDNA D430018E03 gene [Source:MGI Symbol;Acc:MGI:3045245]	2.65817	1.41044	0.0339792	1	yes	up	0.18	0.35	0.23	0.1	0.11	0.06	0.253333	0.09
ENSMUSG00000097640	Gm20033	predicted gene, 20033 [Source:MGI Symbol;Acc:MGI:5012218]	2.41368	1.27123	0.0462329	1	yes	up	1.79	2.74	0.98	1.16	0.27	0.59	1.83667	0.673333
ENSMUSG00000097845	A230020J21Rik	RIKEN cDNA A230020J21 gene [Source:MGI Symbol;Acc:MGI:3704207]	11.3989	3.51082	0.000127727	1	yes	up	3.13	0.85	1.33	0.05	0.05	0.3	1.77	0.133333
ENSMUSG00000098306	Gm28040	predicted gene, 28040 [Source:MGI Symbol;Acc:MGI:5547776]	0.474846	-1.07447	0.0087938	0.142168	yes	down	0.67	1.09	1.34	1.46	1.91	2.91	1.03333	2.09333
ENSMUSG00000098371	Gm28037	predicted gene, 28037 [Source:MGI Symbol;Acc:MGI:5547773]	6.11031	2.61125	0.0316038	1	yes	up	1.21	0.95	2.02	0.63	0	0	1.39333	0.21
ENSMUSG00000098404	Mrip-ps	Mom radiation induced polyposis, pseudogene [Source:MGI Symbol;Acc:MGI:3645947]	0.145517	-2.78074	0.000160074	1	yes	down	0	0.29	0.65	1.67	3.4	1.25	0.313333	2.10667
ENSMUSG00000098678	Mroh6	maestro heat-like repeat family member 6 [Source:MGI Symbol;Acc:MGI:5011755]	0.470427	-1.08796	0.022538	0.243318	yes	down	0.37	0.35	0.4	0.8	0.69	0.77	0.373333	0.753333
ENSMUSG00000099478	Gm28370	predicted gene 28370 [Source:MGI Symbol;Acc:MGI:5579076]	0.491329	-1.02524	0.000196286	0.0128205	yes	down	1.33	0.84	0.72	1.76	2.04	1.8	0.963333	1.86667
ENSMUSG00000099583	H3c4	H3 clustered histone 4 [Source:MGI Symbol;Acc:MGI:2448322]	3.99174	1.99702	0.0207265	1	yes	up	0.52	0.84	0.75	0.33	0.06	0.13	0.703333	0.173333
ENSMUSG00000099923	1700105P06Rik	RIKEN cDNA 1700105P06 gene [Source:MGI Symbol;Acc:MGI:1915479]	7.38426	2.88445	0.00975305	1	yes	up	0.67	0.16	0.22	0.03	0.07	0.03	0.35	0.0433333
ENSMUSG00000099931	Gm29358	predicted gene 29358 [Source:MGI Symbol;Acc:MGI:5580064]	2.30675	1.20586	0.0123908	0.174778	yes	up	0.99	1.31	0.48	0.17	0.51	0.27	0.926667	0.316667
ENSMUSG00000100017	2410022M11Rik	RIKEN cDNA 2410022M11 gene [Source:MGI Symbol;Acc:MGI:1917005]	2.25454	1.17283	0.00524148	0.107409	yes	up	1.32	1.22	1.23	0.49	0.57	0.52	1.25667	0.526667
ENSMUSG00000100220	Gm29331	predicted gene 29331 [Source:MGI Symbol;Acc:MGI:5580037]	0.164191	-2.60655	1.28e-06	0.000310124	yes	down	0	2.51	1.8	6.03	8.58	8.18	1.43667	7.59667
ENSMUSG00000100707	Gm28523	predicted gene 28523 [Source:MGI Symbol;Acc:MGI:5579229]	0.45034	-1.15091	0.00208416	0.061596	yes	down	1.06	0.96	0.77	2.15	1.96	1.73	0.93	1.94667
ENSMUSG00000101249	Gm29216	predicted gene 29216 [Source:MGI Symbol;Acc:MGI:5579922]	0.397671	-1.33035	0.00125335	0.0431993	yes	down	1407.45	2736.92	4018.03	5829.18	6027.3	6378.06	2720.8	6078.18
ENSMUSG00000102101	Zbtb11os1	zinc finger and BTB domain containing 11, opposite strand 1 [Source:MGI Symbol;Acc:MGI:1913641]	2.24508	1.16677	0.0310739	1	yes	up	1.22	1.29	1.03	0.59	0.33	0.56	1.18	0.493333
ENSMUSG00000102824	Pdcd5-ps	programmed cell death 5, pseudogene [Source:MGI Symbol;Acc:MGI:3782009]	0.421998	-1.24469	0.00062376	0.0274769	yes	down	8.5	16.55	17.61	24.91	35.72	25.33	14.22	28.6533
ENSMUSG00000103092	Pcdha5	protocadherin alpha 5 [Source:MGI Symbol;Acc:MGI:1298371]	0.0104179	-6.58478	8.26e-07	1	yes	down	0	0	0	0.19	0.22	0.19	0	0.2
ENSMUSG00000103115	Gm37584	predicted gene, 37584 [Source:MGI Symbol;Acc:MGI:5610812]	5.21511	2.3827	0.0446022	1	yes	up	0.24	0.44	0.5	0.1	0	0.11	0.393333	0.07
ENSMUSG00000103145	Gm37744	predicted gene, 37744 [Source:MGI Symbol;Acc:MGI:5610972]	16.9864	4.08631	0.0346934	1	yes	up	0.14	0.14	0.13	0	0	0	0.136667	0
ENSMUSG00000103553	Gm38218	predicted gene, 38218 [Source:MGI Symbol;Acc:MGI:5611446]	0.152236	-2.71562	0.00200475	1	yes	down	0.03	0.03	0.03	0.17	0.2	0.13	0.03	0.166667
ENSMUSG00000103579	Gm37113	predicted gene, 37113 [Source:MGI Symbol;Acc:MGI:5610341]	0.353598	-1.49982	0.0190213	1	yes	down	0.48	0.36	0.38	0.91	0.92	1.4	0.406667	1.07667
ENSMUSG00000103711	Tstd1	thiosulfate sulfurtransferase (rhodanese)-like domain containing 1 [Source:MGI Symbol;Acc:MGI:3648482]	0.462645	-1.11202	0.00169222	0.0534908	yes	down	11.54	6.12	6.44	9.33	19.75	18.3	8.03333	15.7933
ENSMUSG00000104925	Gm43061	predicted gene 43061 [Source:MGI Symbol;Acc:MGI:5663198]	5.99769	2.58441	0.0478659	1	yes	up	0.18	0.19	0.14	0.05	0.03	0	0.17	0.0266667
ENSMUSG00000105137	Gm42869	predicted gene 42869 [Source:MGI Symbol;Acc:MGI:5663006]	8.00035	3.00006	0.0165322	1	yes	up	0.23	0.44	0.09	0	0.03	0.06	0.253333	0.03
ENSMUSG00000105356	Gm42603	predicted gene 42603 [Source:MGI Symbol;Acc:MGI:5662740]	5.2142	2.38245	0.0377385	1	yes	up	0.22	0.23	0.18	0.03	0.03	0.06	0.21	0.04
ENSMUSG00000105597	4633401B06Rik	RIKEN cDNA 4633401B06 gene [Source:MGI Symbol;Acc:MGI:1918078]	2.76499	1.46727	0.0136331	1	yes	up	1.44	2.55	1.12	0.25	0.87	0.61	1.70333	0.576667
ENSMUSG00000106224	Gm43823	predicted gene 43823 [Source:MGI Symbol;Acc:MGI:5663960]	3.21268	1.68378	0.014657	1	yes	up	0.31	1.04	0.67	0.13	0.15	0.31	0.673333	0.196667
ENSMUSG00000106978	N4bp2os	NEDD4 binding protein 2, opposite strand [Source:MGI Symbol;Acc:MGI:1921484]	2.40617	1.26674	0.0160571	0.202661	yes	up	1.17	0.87	0.66	0.47	0.48	0.37	0.9	0.44
ENSMUSG00000107253	Gm43634	predicted gene 43634 [Source:MGI Symbol;Acc:MGI:5663771]	0.0520232	-4.2647	0.00609446	1	yes	down	0.19	0	0	0.33	1.53	0.91	0.0633333	0.923333
ENSMUSG00000108108	Gm44270	predicted gene, 44270 [Source:MGI Symbol;Acc:MGI:5690662]	2.96088	1.56603	0.014069	1	yes	up	0.88	1.39	0.93	0.38	0.3	0.34	1.06667	0.34
ENSMUSG00000108818	Gm44869	predicted gene 44869 [Source:MGI Symbol;Acc:MGI:5753445]	0.103921	-3.26644	0.0201427	1	yes	down	0	0.85	0.66	4.43	3.24	4.23	0.503333	3.96667
ENSMUSG00000108954	Gm44901	predicted gene 44901 [Source:MGI Symbol;Acc:MGI:5753477]	2.51188	1.32877	0.00419878	0.0955553	yes	up	0.61	0.57	0.45	0.31	0.19	0.12	0.543333	0.206667
ENSMUSG00000109168	Gm44709	predicted gene 44709 [Source:MGI Symbol;Acc:MGI:5753285]	0.342255	-1.54685	0.00546809	0.109723	yes	down	1.32	2.85	5.58	8.62	6.49	10.99	3.25	8.7
ENSMUSG00000109799	Gm45515	predicted gene 45515 [Source:MGI Symbol;Acc:MGI:5791351]	2.16704	1.11572	0.0392298	0.318693	yes	up	0.64	1.38	0.45	0.38	0.25	0.43	0.823333	0.353333
ENSMUSG00000110633	Gm32122	predicted gene, 32122 [Source:MGI Symbol;Acc:MGI:5591281]	0.486548	-1.03935	0.00867262	0.141436	yes	down	0.75	0.5	0.53	0.94	1.4	1.16	0.593333	1.16667
ENSMUSG00000110790	Gm47079	predicted gene, 47079 [Source:MGI Symbol;Acc:MGI:6095803]	17.1208	4.09768	0.0346713	1	yes	up	0.06	0.08	0.04	0	0	0	0.06	0
ENSMUSG00000111312	Gm47205	predicted gene, 47205 [Source:MGI Symbol;Acc:MGI:6096005]	33.3848	5.06112	0.00445115	1	yes	up	0.45	0.05	0.04	0	0	0	0.18	0
ENSMUSG00000111390	Gm48796	predicted gene, 48796 [Source:MGI Symbol;Acc:MGI:6098500]	0.37463	-1.41646	0.00726598	0.128005	yes	down	0.31	0.1	0.17	0.37	0.48	0.62	0.193333	0.49
ENSMUSG00000111421	Gm47643	predicted gene, 47643 [Source:MGI Symbol;Acc:MGI:6096720]	12.7446	3.67181	0.0310502	1	yes	up	0.08	0.15	0.04	0	0	0.02	0.09	0.00666667
ENSMUSG00000111692	Gm49373	predicted gene, 49373 [Source:MGI Symbol;Acc:MGI:6121591]	0.295456	-1.75898	0.0435026	1	yes	down	0	0.26	0.08	0.35	0.4	0.37	0.113333	0.373333
ENSMUSG00000112336	Gm47766	predicted gene, 47766 [Source:MGI Symbol;Acc:MGI:6096919]	19.4992	4.28534	0.00658951	1	yes	up	1.51	0.3	0.89	0	0	0.12	0.9	0.04
ENSMUSG00000112346	Gm48768	predicted gene, 48768 [Source:MGI Symbol;Acc:MGI:6098457]	2.41467	1.27183	0.000417782	0.0210674	yes	up	1.55	1.38	1.46	0.67	0.53	0.54	1.46333	0.58
ENSMUSG00000112963	Gm6093	predicted gene 6093 [Source:MGI Symbol;Acc:MGI:3648840]	0.0525734	-4.24952	0.0222257	1	yes	down	0	0	0	0.13	0.12	0.06	0	0.103333
ENSMUSG00000113688	A930027P06Rik	RIKEN cDNA A930027P06 gene [Source:MGI Symbol;Acc:MGI:3026956]	16.8523	4.07487	0.0363998	1	yes	up	0.07	0.05	0.08	0	0	0	0.0666667	0
ENSMUSG00000114016	Gm47258	predicted gene, 47258 [Source:MGI Symbol;Acc:MGI:6096089]	3.33692	1.73852	0.0449057	1	yes	up	0.45	0.71	0.47	0.09	0.16	0.2	0.543333	0.15
ENSMUSG00000114102	Gm48048	predicted gene, 48048 [Source:MGI Symbol;Acc:MGI:6097366]	84.538	6.40153	0.00451561	1	yes	up	0.32	10.71	3.04	0.05	0	0	4.69	0.0166667
ENSMUSG00000114165	Gm47513	predicted gene, 47513 [Source:MGI Symbol;Acc:MGI:6096505]	13.6885	3.77489	0.0227309	1	yes	up	0.18	0.23	0.1	0	0.03	0	0.17	0.01
ENSMUSG00000114788	Gm48899	predicted gene, 48899 [Source:MGI Symbol;Acc:MGI:6098665]	0.034402	-4.86136	0.00339481	1	yes	down	0	0.07	0	1	0.54	0.43	0.0233333	0.656667
ENSMUSG00000115368	Gm48942	predicted gene, 48942 [Source:MGI Symbol;Acc:MGI:6118263]	0.454295	-1.1383	0.0314304	0.287546	yes	down	1.41	1.21	0.92	1.38	3.17	2.64	1.18	2.39667
ENSMUSG00000116114	Gm35853	predicted gene, 35853 [Source:MGI Symbol;Acc:MGI:5595012]	2.62448	1.39203	0.00672505	0.121844	yes	up	0.78	1.34	0.72	0.42	0.34	0.25	0.946667	0.336667
ENSMUSG00000116121	Gm49486	predicted gene, 49486 [Source:MGI Symbol;Acc:MGI:6155161]	0.458142	-1.12613	0.0307655	1	yes	down	0.28	0.27	0.32	0.53	0.74	0.51	0.29	0.593333
ENSMUSG00000116220	A430088P11Rik	RIKEN cDNA A430088P11 gene [Source:MGI Symbol;Acc:MGI:3605804]	2.52206	1.3346	0.0384933	1	yes	up	0.35	0.27	0.27	0.11	0.06	0.1	0.296667	0.09
ENSMUSG00000116679	Gm49739	predicted gene, 49739 [Source:MGI Symbol;Acc:MGI:6215227]	0.214007	-2.22427	0.0417672	1	yes	down	0	34.18	16.39	32.41	36.6	69.94	16.8567	46.3167
ENSMUSG00000117789	Gm50388	predicted gene, 50388 [Source:MGI Symbol;Acc:MGI:6303291]	2.00229	1.00165	0.0109057	0.161521	yes	up	1.6	0.97	0.71	0.74	0.54	0.28	1.09333	0.52
ENSMUSG00000119967	-	novel transcript	6.35128	2.66705	0.0185014	1	yes	up	0.27	0.36	0.29	0.1	0.04	0	0.306667	0.0466667
ENSMUSG00000119979	-	novel transcript	3.00653	1.5881	0.0085675	1	yes	up	3.21	4.61	1.69	1.42	0.82	0.64	3.17	0.96
ENSMUSG00000120022	-	novel transcript, antisense to Iws1	2.18086	1.12489	0.0366096	1	yes	up	1.13	2.42	3.24	1.15	0.94	0.87	2.26333	0.986667
ENSMUSG00000120025	-	novel transcript	2.5988	1.37785	0.000864916	0.0345517	yes	up	11.51	18.31	15.75	5.13	3.65	6.46	15.19	5.08
ENSMUSG00000120055	-	novel transcript	3.08832	1.62682	0.00774465	1	yes	up	1.18	1.29	1.15	0.66	0.27	0.15	1.20667	0.36
ENSMUSG00000120121	-	novel transcript	3.73292	1.9003	0.0270173	1	yes	up	0.51	0.72	0.58	0.24	0.16	0.05	0.603333	0.15
ENSMUSG00000120193	Gm36457	predicted gene, 36457 [Source:NCBI gene (formerly Entrezgene);Acc:102640387]	3.13637	1.6491	0.012745	1	yes	up	1.07	1.42	1.43	0.13	1	0.33	1.30667	0.486667
ENSMUSG00000120304	-	novel transcript	10.3164	3.36687	0.00442334	1	yes	up	6.14	2.41	2.32	0.49	0.41	0	3.62333	0.3
ENSMUSG00000120632	-	novel transcript, antisense to Gtdc1	17.5729	4.13528	0.00843156	1	yes	up	0.22	0.14	0.13	0	0.03	0	0.163333	0.01
ENSMUSG00000120826	-	novel transcript, antisense to Hexim2	2.07511	1.05319	0.0257607	0.261064	yes	up	1.07	1.46	1.17	0.47	0.58	0.62	1.23333	0.556667
ENSMUSG00000121053	-	novel transcript, sense intronic to Ndufaf2	2.6667	1.41506	0.00807692	0.135615	yes	up	0.83	1.09	0.49	0.39	0.27	0.19	0.803333	0.283333
ENSMUSG00000121082	-	novel transcript, antisense to Dennd6b	2.0777	1.05499	0.00832914	0.138427	yes	up	0.95	1.6	1.07	0.63	0.4	0.62	1.20667	0.55
ENSMUSG00000121115	-	novel transcript	12.6261	3.65834	0.00730828	1	yes	up	0.36	0.14	0.27	0.03	0	0.03	0.256667	0.02
ENSMUSG00000121215	-	novel transcript	2.68619	1.42556	0.0370651	1	yes	up	0.68	0.93	0.78	0.44	0.3	0.09	0.796667	0.276667
ENSMUSG00002074955	Snord3b4	small nucleolar RNA, C/D box 3B4 [Source:MGI Symbol;Acc:MGI:97988]	0.222386	-2.16886	0.0463066	1	yes	down	0	16.77	21.45	34.45	38.57	35.86	12.74	36.2933
ENSMUSG00002075453	Snord3b3	small nucleolar RNA, C/D box 3B3 [Source:MGI Symbol;Acc:MGI:97987]	0.222386	-2.16886	0.0463066	1	yes	down	0	16.77	21.45	34.45	38.57	35.86	12.74	36.2933
ENSMUSG00002075931	Snord3b2	small nucleolar RNA, C/D box 3B2 [Source:MGI Symbol;Acc:MGI:97986]	0.222386	-2.16886	0.0463066	1	yes	down	0	16.77	21.45	34.45	38.57	35.86	12.74	36.2933
ENSMUSG00002076650	Snord3b1	small nucleolar RNA, C/D box 3B1 [Source:MGI Symbol;Acc:MGI:97985]	0.222386	-2.16886	0.0463066	1	yes	down	0	16.77	21.45	34.45	38.57	35.86	12.74	36.2933

## Sheet: RNA-seq probiotic6020
Gene_id	Gene name	Gene description	FC(Prob_60min/Prob_20min)	Log2FC(Prob_60min/Prob_20min)	Pvalue	Padjust	Significant	Regulate	P60_1	P60_2	P60_3	P20_1	P20_2	P20_3	Prob_60min	Prob_20min
ENSMUSG00000000392	Fap	fibroblast activation protein [Source:MGI Symbol;Acc:MGI:109608]	0.227592	-2.13548	0.0484804	1	yes	down	0.06	0.06	0.04	0.36	0.29	0.32	0.0533333	0.323333
ENSMUSG00000001627	Ifrd1	interferon-related developmental regulator 1 [Source:MGI Symbol;Acc:MGI:1316717]	2.04761	1.03394	2.44e-23	6.11e-21	yes	up	57.96	66.85	50.53	35.67	29.76	31.7	58.4467	32.3767
ENSMUSG00000003541	Ier3	immediate early response 3 [Source:MGI Symbol;Acc:MGI:104814]	3.17646	1.66742	1.02e-40	5.92e-38	yes	up	63.26	60.44	59.6	15.77	17.51	21.34	61.1	18.2067
ENSMUSG00000003545	Fosb	FBJ osteosarcoma oncogene B [Source:MGI Symbol;Acc:MGI:95575]	2.37982	1.25085	1.26e-12	1.53e-10	yes	up	6.81	9.14	6.72	2.6	3.53	2.43	7.55667	2.85333
ENSMUSG00000004552	Ctse	cathepsin E [Source:MGI Symbol;Acc:MGI:107361]	0.476061	-1.07078	0.00205365	0.0367668	yes	down	1.18	1.19	1.31	1.5	2.05	3.85	1.22667	2.46667
ENSMUSG00000005968	Tuft1	tuftelin 1 [Source:MGI Symbol;Acc:MGI:109572]	2.06177	1.04388	7.96e-27	2.33e-24	yes	up	42.1	51.35	40.81	19.45	18.11	16.99	44.7533	18.1833
ENSMUSG00000009246	Trpm5	transient receptor potential cation channel, subfamily M, member 5 [Source:MGI Symbol;Acc:MGI:1861718]	0.391384	-1.35334	0.00242563	1	yes	down	0.2	0.35	0.35	0.49	0.61	1.01	0.3	0.703333
ENSMUSG00000014599	Csf1	colony stimulating factor 1 (macrophage) [Source:MGI Symbol;Acc:MGI:1339753]	2.70075	1.43336	0.00104634	1	yes	up	0.6	1.21	1	0.18	0.28	0.45	0.936667	0.303333
ENSMUSG00000015312	Gadd45b	growth arrest and DNA-damage-inducible 45 beta [Source:MGI Symbol;Acc:MGI:107776]	2.82856	1.50007	1.51e-35	6.97e-33	yes	up	78.82	70.48	68.73	20.18	26.03	27.79	72.6767	24.6667
ENSMUSG00000017418	Arl5b	ADP-ribosylation factor-like 5B [Source:MGI Symbol;Acc:MGI:1923119]	2.16474	1.11419	9.97e-22	2.35e-19	yes	up	12.94	18.04	12.58	7.67	5.95	7.97	14.52	7.19667
ENSMUSG00000018899	Irf1	interferon regulatory factor 1 [Source:MGI Symbol;Acc:MGI:96590]	3.53458	1.82154	6.14e-54	5.68e-51	yes	up	25.22	27.16	25.53	8.08	6.98	7.74	25.97	7.6
ENSMUSG00000019577	Pdk4	pyruvate dehydrogenase kinase, isoenzyme 4 [Source:MGI Symbol;Acc:MGI:1351481]	2.28698	1.19344	3.75e-25	1.02e-22	yes	up	17.63	19.22	15.39	7.88	6.76	7.08	17.4133	7.24
ENSMUSG00000019850	Tnfaip3	tumor necrosis factor, alpha-induced protein 3 [Source:MGI Symbol;Acc:MGI:1196377]	6.5982	2.72207	4.5e-144	5.41e-140	yes	up	24.15	25.64	22.81	3.16	3.45	3.8	24.2	3.47
ENSMUSG00000020044	Timp3	tissue inhibitor of metalloproteinase 3 [Source:MGI Symbol;Acc:MGI:98754]	2.14645	1.10195	1.6e-05	0.000693953	yes	up	1.41	2.39	1.69	0.84	0.81	0.68	1.83	0.776667
ENSMUSG00000020205	Phlda1	pleckstrin homology like domain, family A, member 1 [Source:MGI Symbol;Acc:MGI:1096880]	2.31789	1.21281	6.29e-34	2.44e-31	yes	up	39.49	42.99	41.11	15.06	16.51	18.39	41.1967	16.6533
ENSMUSG00000020226	Slc5a4b	solute carrier family 5 (neutral amino acid transporters, system A), member 4b [Source:MGI Symbol;Acc:MGI:1890478]	0.447517	-1.15999	0.000422613	0.0108712	yes	down	1.47	0.49	0.8	1.9	2.01	2.01	0.92	1.97333
ENSMUSG00000020363	Gfpt2	glutamine fructose-6-phosphate transaminase 2 [Source:MGI Symbol;Acc:MGI:1338883]	16.8879	4.07792	0.0373739	1	yes	up	0.07	0.14	0.02	0	0	0	0.0766667	0
ENSMUSG00000020423	Btg2	BTG anti-proliferation factor 2 [Source:MGI Symbol;Acc:MGI:108384]	2.18749	1.12927	1.38e-45	9.77e-43	yes	up	96.15	112.05	103.17	42.45	43.16	49.38	103.79	44.9967
ENSMUSG00000020467	Efemp1	epidermal growth factor-containing fibulin-like extracellular matrix protein 1 [Source:MGI Symbol;Acc:MGI:1339998]	0.331868	-1.59132	0.021808	1	yes	down	0.24	0.18	0.22	0.3	0.61	0.73	0.213333	0.546667
ENSMUSG00000021025	Nfkbia	nuclear factor of kappa light polypeptide gene enhancer in B cells inhibitor, alpha [Source:MGI Symbol;Acc:MGI:104741]	4.14427	2.05112	6.41e-121	2.57e-117	yes	up	228.28	220.35	206.07	51.04	49.86	50.6	218.233	50.5
ENSMUSG00000021250	Fos	FBJ osteosarcoma oncogene [Source:MGI Symbol;Acc:MGI:95574]	2.10926	1.07674	1.7e-34	7.55e-32	yes	up	110.19	139.5	124.44	49.99	60.49	54.61	124.71	55.03
ENSMUSG00000021367	Edn1	endothelin 1 [Source:MGI Symbol;Acc:MGI:95283]	3.2074	1.6814	3.47e-18	6.51e-16	yes	up	10.4	8.45	8.01	2.54	2.47	2.97	8.95333	2.66
ENSMUSG00000021575	Ahrr	aryl-hydrocarbon receptor repressor [Source:MGI Symbol;Acc:MGI:1333776]	2.5682	1.36076	0.0419406	1	yes	up	0.2	0.22	0.22	0.1	0.04	0.1	0.213333	0.08
ENSMUSG00000022528	Hes1	hes family bHLH transcription factor 1 [Source:MGI Symbol;Acc:MGI:104853]	2.55486	1.35324	4.76e-34	1.97e-31	yes	up	49.41	44.02	46.43	17.87	16.94	17.87	46.62	17.56
ENSMUSG00000022602	Arc	activity regulated cytoskeletal-associated protein [Source:MGI Symbol;Acc:MGI:88067]	11.3487	3.50445	7.63e-54	6.55e-51	yes	up	6.41	9.25	9.67	0.57	0.95	0.59	8.44333	0.703333
ENSMUSG00000022863	Btg3	BTG anti-proliferation factor 3 [Source:MGI Symbol;Acc:MGI:109532]	3.04235	1.60519	8.86e-16	1.25e-13	yes	up	7.79	10.95	8.74	3.73	3.09	3.28	9.16	3.36667
ENSMUSG00000023034	Nr4a1	nuclear receptor subfamily 4, group A, member 1 [Source:MGI Symbol;Acc:MGI:1352454]	4.35368	2.12224	1.17e-50	9.36e-48	yes	up	23.64	23.84	17.85	4.62	4.53	3.95	21.7767	4.36667
ENSMUSG00000024030	Abcg1	ATP binding cassette subfamily G member 1 [Source:MGI Symbol;Acc:MGI:107704]	3.26046	1.70508	0.036725	1	yes	up	0.15	0.17	0.24	0.17	0.03	0.04	0.186667	0.08
ENSMUSG00000024032	Tff1	trefoil factor 1 [Source:MGI Symbol;Acc:MGI:88135]	0.312399	-1.67854	0.00257276	0.0435188	yes	down	11.3	11.6	11.91	16.24	26.48	62.72	11.6033	35.1467
ENSMUSG00000024052	Lpin2	lipin 2 [Source:MGI Symbol;Acc:MGI:1891341]	2.05967	1.04241	5.07e-31	1.84e-28	yes	up	37.72	51.1	38.86	18.28	17.76	18.11	42.56	18.05
ENSMUSG00000024354	Slc23a1	solute carrier family 23 (nucleobase transporters), member 1 [Source:MGI Symbol;Acc:MGI:1341903]	0.443897	-1.1717	0.00609313	0.0784532	yes	down	1.19	0.41	0.34	1.28	1.63	1.65	0.646667	1.52
ENSMUSG00000024401	Tnf	tumor necrosis factor [Source:MGI Symbol;Acc:MGI:104798]	7.82718	2.96849	8.09e-18	1.43e-15	yes	up	4.23	5.3	4.3	0.6	0.57	0.5	4.61	0.556667
ENSMUSG00000024521	Pmaip1	phorbol-12-myristate-13-acetate-induced protein 1 [Source:MGI Symbol;Acc:MGI:1930146]	2.67274	1.41832	3.95e-41	2.49e-38	yes	up	84.55	95.23	67.3	29.06	28.17	29.81	82.36	29.0133
ENSMUSG00000024912	Fosl1	fos-like antigen 1 [Source:MGI Symbol;Acc:MGI:107179]	4.93908	2.30424	1.21e-05	1	yes	up	1.71	2.46	2.34	0.26	0.33	0.35	2.17	0.313333
ENSMUSG00000025243	Slc6a20b	solute carrier family 6 (neurotransmitter transporter), member 20B [Source:MGI Symbol;Acc:MGI:1336891]	0.492362	-1.02221	0.0273442	1	yes	down	0.48	0.14	0.13	0.38	0.5	0.4	0.25	0.426667
ENSMUSG00000025652	Tmem89	transmembrane protein 89 [Source:MGI Symbol;Acc:MGI:1916634]	0.180061	-2.47345	0.0112559	1	yes	down	0.18	0.38	0	1.04	1.16	0.66	0.186667	0.953333
ENSMUSG00000026064	Ptp4a1	protein tyrosine phosphatase 4a1 [Source:MGI Symbol;Acc:MGI:1277096]	2.45341	1.29479	3.47e-16	5.28e-14	yes	up	7.16	12.88	7.88	4.67	3.31	3.71	9.30667	3.89667
ENSMUSG00000026166	Ccl20	chemokine (C-C motif) ligand 20 [Source:MGI Symbol;Acc:MGI:1329031]	6.34856	2.66643	1.44e-35	6.94e-33	yes	up	23.38	29	25.88	4.36	4.65	3.06	26.0867	4.02333
ENSMUSG00000026185	Igfbp5	insulin-like growth factor binding protein 5 [Source:MGI Symbol;Acc:MGI:96440]	0.339462	-1.55868	0.0145421	1	yes	down	0.09	0.13	0.07	0.07	0.39	0.3	0.0966667	0.253333
ENSMUSG00000026193	Fn1	fibronectin 1 [Source:MGI Symbol;Acc:MGI:95566]	0.208941	-2.25883	0.0205719	1	yes	down	0.26	0	0.04	0.45	0.39	0.08	0.1	0.306667
ENSMUSG00000026249	Serpine2	serine (or cysteine) peptidase inhibitor, clade E, member 2 [Source:MGI Symbol;Acc:MGI:101780]	0.1193	-3.06733	0.0435848	1	yes	down	0	0	0.1	0.16	0.19	0.25	0.0333333	0.2
ENSMUSG00000026347	Tmem163	transmembrane protein 163 [Source:MGI Symbol;Acc:MGI:1919410]	0.0895065	-3.48186	0.0483817	1	yes	down	0.03	0	0	0.19	0.55	0.15	0.01	0.296667
ENSMUSG00000026586	Prrx1	paired related homeobox 1 [Source:MGI Symbol;Acc:MGI:97712]	0.4593	-1.12249	0.000647026	0.0150912	yes	down	1.11	0.79	0.69	1.38	1.84	1.79	0.863333	1.67
ENSMUSG00000026628	Atf3	activating transcription factor 3 [Source:MGI Symbol;Acc:MGI:109384]	4.02308	2.0083	1.38e-115	4.15e-112	yes	up	88.63	114.21	108.39	24.72	24.29	24.49	103.743	24.5
ENSMUSG00000026819	Slc25a25	solute carrier family 25 (mitochondrial carrier, phosphate carrier), member 25 [Source:MGI Symbol;Acc:MGI:1915913]	2.24683	1.16789	1.92e-30	6.39e-28	yes	up	18.73	21.25	19.18	7.98	7.87	7.83	19.72	7.89333
ENSMUSG00000027313	Chac1	ChaC, cation transport regulator 1 [Source:MGI Symbol;Acc:MGI:1916315]	2.47185	1.30559	7.41e-16	1.07e-13	yes	up	15.21	22.46	21.48	6.5	7.37	8.71	19.7167	7.52667
ENSMUSG00000027338	Prnd	prion like protein doppel [Source:MGI Symbol;Acc:MGI:1346999]	3.11679	1.64006	0.0455008	1	yes	up	0.21	0.57	0.33	0.2	0	0.18	0.37	0.126667
ENSMUSG00000027660	Skil	SKI-like [Source:MGI Symbol;Acc:MGI:106203]	2.18627	1.12847	7.3e-20	1.51e-17	yes	up	8.67	12.11	8.01	4.15	3.75	4.7	9.59667	4.2
ENSMUSG00000027797	Dclk1	doublecortin-like kinase 1 [Source:MGI Symbol;Acc:MGI:1330861]	0.470301	-1.08834	0.0177122	1	yes	down	0.23	0.22	0.15	0.26	0.35	0.28	0.2	0.296667
ENSMUSG00000028017	Egf	epidermal growth factor [Source:MGI Symbol;Acc:MGI:95290]	2.34789	1.23136	0.0375912	1	yes	up	0.81	0.68	0.2	0.24	0.18	0.18	0.563333	0.2
ENSMUSG00000028128	F3	coagulation factor III [Source:MGI Symbol;Acc:MGI:88381]	2.67307	1.4185	1.84e-24	4.9e-22	yes	up	24.38	33.42	22.2	9.34	10.05	8.58	26.6667	9.32333
ENSMUSG00000028195	Ccn1	cellular communication network factor 1 [Source:MGI Symbol;Acc:MGI:88613]	3.42902	1.7778	1.31e-80	3.15e-77	yes	up	65.05	79.82	75.3	19.56	22.54	18.7	73.39	20.2667
ENSMUSG00000028214	Gem	GTP binding protein (gene overexpressed in skeletal muscle) [Source:MGI Symbol;Acc:MGI:99844]	2.4425	1.28836	0.000276044	0.00772987	yes	up	1.97	3.07	1.68	1.06	0.79	0.75	2.24	0.866667
ENSMUSG00000028680	Plk3	polo like kinase 3 [Source:MGI Symbol;Acc:MGI:109604]	2.36594	1.24241	1.39e-29	4.5e-27	yes	up	35.24	35.88	31.3	13.64	12.55	14.83	34.14	13.6733
ENSMUSG00000028967	Errfi1	ERBB receptor feedback inhibitor 1 [Source:MGI Symbol;Acc:MGI:1921405]	2.08764	1.06188	4.1e-34	1.76e-31	yes	up	64.07	83.76	73.37	34.56	32.12	33.36	73.7333	33.3467
ENSMUSG00000029378	Areg	amphiregulin [Source:MGI Symbol;Acc:MGI:88068]	2.18598	1.12828	5.18e-64	8.9e-61	yes	up	307.42	356.93	318.41	140.22	140.33	144.13	327.587	141.56
ENSMUSG00000029380	Cxcl1	chemokine (C-X-C motif) ligand 1 [Source:MGI Symbol;Acc:MGI:108068]	15.0613	3.91278	2.04e-14	2.66e-12	yes	up	5.68	4.68	5.64	0.5	0.18	0.36	5.33333	0.346667
ENSMUSG00000030107	Usp18	ubiquitin specific peptidase 18 [Source:MGI Symbol;Acc:MGI:1344364]	0.111752	-3.16162	0.00315655	1	yes	down	0.2	0.08	0	0.35	0.12	2.18	0.0933333	0.883333
ENSMUSG00000030366	Ceacam12	CEA cell adhesion molecule 12 [Source:MGI Symbol;Acc:MGI:1914565]	2.3037	1.20395	0.0229798	1	yes	up	0.98	3.34	2	0.49	0.85	1.31	2.10667	0.883333
ENSMUSG00000030623	Prss23os	protease, serine 23, opposite strand [Source:MGI Symbol;Acc:MGI:1916654]	4.60757	2.20401	7.67e-05	1	yes	up	1.96	2.92	1.25	0.31	0.7	0.22	2.04333	0.41
ENSMUSG00000030790	Adm	adrenomedullin [Source:MGI Symbol;Acc:MGI:108058]	2.98638	1.5784	1.83e-12	2.2e-10	yes	up	8.16	11.14	9.18	2.44	3.98	3.06	9.49333	3.16
ENSMUSG00000030921	Trim30a	tripartite motif-containing 30A [Source:MGI Symbol;Acc:MGI:98178]	0.112857	-3.14744	0.0021581	1	yes	down	0.05	0.05	0.02	0.13	0.02	0.86	0.04	0.336667
ENSMUSG00000031444	F10	coagulation factor X [Source:MGI Symbol;Acc:MGI:103107]	0.280617	-1.83333	0.00503606	1	yes	down	0.33	0.06	0.42	0.52	0.81	1.43	0.27	0.92
ENSMUSG00000031530	Dusp4	dual specificity phosphatase 4 [Source:MGI Symbol;Acc:MGI:2442191]	2.04796	1.03419	1.19e-31	4.48e-29	yes	up	49.38	59.36	61.73	24.4	27.09	27.41	56.8233	26.3
ENSMUSG00000031972	Acta1	actin alpha 1, skeletal muscle [Source:MGI Symbol;Acc:MGI:87902]	3.30244	1.72353	9.31e-61	1.24e-57	yes	up	115.41	158.42	156.22	44.74	39.62	37.43	143.35	40.5967
ENSMUSG00000032238	Rora	RAR-related orphan receptor alpha [Source:MGI Symbol;Acc:MGI:104661]	3.23801	1.69511	0.0393598	1	yes	up	0.15	0.14	0.07	0.05	0.03	0.02	0.12	0.0333333
ENSMUSG00000032315	Cyp1a1	cytochrome P450, family 1, subfamily a, polypeptide 1 [Source:MGI Symbol;Acc:MGI:88588]	2.13635	1.09515	2.55e-13	3.21e-11	yes	up	16	17.24	25.01	8.43	7.97	9.45	19.4167	8.61667
ENSMUSG00000032496	Ltf	lactotransferrin [Source:MGI Symbol;Acc:MGI:96837]	2.44214	1.28814	0.0449339	1	yes	up	0.67	0.71	1.4	1.27	0.21	0.82	0.926667	0.766667
ENSMUSG00000032501	Trib1	tribbles pseudokinase 1 [Source:MGI Symbol;Acc:MGI:2443397]	2.19516	1.13432	3.36e-49	2.53e-46	yes	up	41.9	49.71	48.41	18.97	20.38	20.56	46.6733	19.97
ENSMUSG00000032661	Oas3	2'-5' oligoadenylate synthetase 3 [Source:MGI Symbol;Acc:MGI:2180850]	0.284239	-1.81482	0.0160681	1	yes	down	0.15	0.11	0.06	0.07	0.15	1.07	0.106667	0.43
ENSMUSG00000033187	BC016579	cDNA sequence, BC016579 [Source:MGI Symbol;Acc:MGI:2384848]	2.34094	1.22709	4.83e-16	7.26e-14	yes	up	11.98	13.39	11.91	4.23	5.73	5.14	12.4267	5.03333
ENSMUSG00000033355	Rtp4	receptor transporter protein 4 [Source:MGI Symbol;Acc:MGI:1915025]	0.145878	-2.77717	0.0149173	1	yes	down	0.48	0.36	0.52	0.72	1.01	7.41	0.453333	3.04667
ENSMUSG00000033730	Egr3	early growth response 3 [Source:MGI Symbol;Acc:MGI:1306780]	8.66444	3.11511	2.73e-09	1	yes	up	0.69	1.15	0.83	0.14	0.25	0.11	0.89	0.166667
ENSMUSG00000033863	Klf9	Kruppel-like factor 9 [Source:MGI Symbol;Acc:MGI:1333856]	3.22233	1.68811	1.26e-11	1.33e-09	yes	up	1.64	2.45	2.3	0.54	0.58	0.75	2.13	0.623333
ENSMUSG00000034168	Irf2bpl	interferon regulatory factor 2 binding protein-like [Source:MGI Symbol;Acc:MGI:2442463]	2.08172	1.05778	2.54e-16	4.01e-14	yes	up	11.39	15.14	16.2	5.56	6.78	7.1	14.2433	6.48
ENSMUSG00000034765	Dusp5	dual specificity phosphatase 5 [Source:MGI Symbol;Acc:MGI:2685183]	2.65826	1.41048	2.85e-56	3.12e-53	yes	up	40.07	45.33	40.29	14.68	14.73	15.45	41.8967	14.9533
ENSMUSG00000034855	Cxcl10	chemokine (C-X-C motif) ligand 10 [Source:MGI Symbol;Acc:MGI:1352450]	37.511	5.22924	2.61e-17	4.35e-15	yes	up	6.58	6.67	5.71	0.15	0.15	0.23	6.32	0.176667
ENSMUSG00000035356	Nfkbiz	nuclear factor of kappa light polypeptide gene enhancer in B cells inhibitor, zeta [Source:MGI Symbol;Acc:MGI:1931595]	4.82397	2.27022	1.45e-76	2.9e-73	yes	up	42.9	38.54	31.07	7.48	7.03	7.76	37.5033	7.42333
ENSMUSG00000036067	Slc2a6	solute carrier family 2 (facilitated glucose transporter), member 6 [Source:MGI Symbol;Acc:MGI:2443286]	3.36889	1.75227	0.0277127	1	yes	up	0.31	0.3	0.37	0.11	0.11	0.11	0.326667	0.11
ENSMUSG00000036390	Gadd45a	growth arrest and DNA-damage-inducible 45 alpha [Source:MGI Symbol;Acc:MGI:107799]	2.00932	1.00671	6.03e-34	2.41e-31	yes	up	154.99	160.84	138.12	68.72	72.88	72.55	151.317	71.3833
ENSMUSG00000036492	Rnf39	ring finger protein 39 [Source:MGI Symbol;Acc:MGI:2156378]	2.44877	1.29206	9.19e-05	0.00313824	yes	up	2.53	4.45	3.71	1.36	1.28	1	3.56333	1.21333
ENSMUSG00000037053	Azgp1	alpha-2-glycoprotein 1, zinc [Source:MGI Symbol;Acc:MGI:103163]	0.499803	-1.00057	0.0307185	1	yes	down	1.31	0.74	0.73	1.73	1.8	1.52	0.926667	1.68333
ENSMUSG00000037211	Spry1	sprouty RTK signaling antagonist 1 [Source:MGI Symbol;Acc:MGI:1345139]	2.1648	1.11424	1.05e-17	1.84e-15	yes	up	13.2	17.72	16.49	7.47	7.16	6.06	15.8033	6.89667
ENSMUSG00000037797	Adh4	alcohol dehydrogenase 4 (class II), pi polypeptide [Source:MGI Symbol;Acc:MGI:1349472]	0.435751	-1.19842	1.8e-05	0.00075595	yes	down	3.08	2.31	2.21	4.39	8.13	6.29	2.53333	6.27
ENSMUSG00000037868	Egr2	early growth response 2 [Source:MGI Symbol;Acc:MGI:95296]	11.6295	3.53972	1.19e-55	1.19e-52	yes	up	6.3	8.66	8.3	1.15	0.56	0.99	7.75333	0.9
ENSMUSG00000037887	Dusp8	dual specificity phosphatase 8 [Source:MGI Symbol;Acc:MGI:106626]	2.64327	1.40233	8.92e-31	3.15e-28	yes	up	9.67	11.36	13.05	4.3	3.38	4.04	11.36	3.90667
ENSMUSG00000037921	Ddx60	DExD/H box helicase 60 [Source:MGI Symbol;Acc:MGI:2384570]	0.216535	-2.20733	0.034427	0.233228	yes	down	0.21	0.17	0.11	0.36	0.2	1.62	0.163333	0.726667
ENSMUSG00000038065	Mturn	maturin, neural progenitor differentiation regulator homolog (Xenopus) [Source:MGI Symbol;Acc:MGI:1915485]	2.29652	1.19945	0.038879	1	yes	up	0.26	0.63	0.32	0.08	0.14	0.08	0.403333	0.1
ENSMUSG00000038152	5033430I15Rik	RIKEN cDNA 5033430I15 gene [Source:MGI Symbol;Acc:MGI:1923250]	2.42684	1.27908	0.0307826	1	yes	up	0.71	1.03	2.05	0.15	1.07	0.91	1.26333	0.71
ENSMUSG00000038508	Gdf15	growth differentiation factor 15 [Source:MGI Symbol;Acc:MGI:1346047]	2.16373	1.11352	2.49e-19	5e-17	yes	up	25.57	30.98	31.93	12.39	13.11	13.4	29.4933	12.9667
ENSMUSG00000038843	Gcnt1	glucosaminyl (N-acetyl) transferase 1, core 2 [Source:MGI Symbol;Acc:MGI:95676]	0.343522	-1.54153	0.0249142	1	yes	down	0.07	0.16	0.06	0.19	0.29	0.24	0.0966667	0.24
ENSMUSG00000039568	Ubald1	UBA-like domain containing 1 [Source:MGI Symbol;Acc:MGI:1916255]	2.2995	1.20132	2.26e-26	6.48e-24	yes	up	20.51	27.5	25.36	11.58	12.1	10.91	24.4567	11.53
ENSMUSG00000039697	Ncoa7	nuclear receptor coactivator 7 [Source:MGI Symbol;Acc:MGI:2444847]	2.74956	1.4592	9.93e-20	2.02e-17	yes	up	12.06	16.53	10.96	4.04	3.46	3.62	13.1833	3.70667
ENSMUSG00000039942	Ptger4	prostaglandin E receptor 4 (subtype EP4) [Source:MGI Symbol;Acc:MGI:104311]	2.36066	1.23919	7.5e-15	1.02e-12	yes	up	5.36	6.72	6.37	2.56	2.59	2.25	6.15	2.46667
ENSMUSG00000040152	Thbs1	thrombospondin 1 [Source:MGI Symbol;Acc:MGI:98737]	7.3205	2.87194	6.52e-10	5.67e-08	yes	up	4.09	7.17	5.37	0.41	0.6	1.09	5.54333	0.7
ENSMUSG00000041773	Enc1	ectodermal-neural cortex 1 [Source:MGI Symbol;Acc:MGI:109610]	2.28575	1.19267	5.63e-26	1.57e-23	yes	up	9.54	12.4	12.28	4.9	4.62	4.68	11.4067	4.73333
ENSMUSG00000041842	Fhdc1	FH2 domain containing 1 [Source:MGI Symbol;Acc:MGI:2684972]	2.43044	1.28121	1.03e-40	5.92e-38	yes	up	14.77	19.3	17.45	6.91	6.61	6.46	17.1733	6.66
ENSMUSG00000042677	Zc3h12a	zinc finger CCCH type containing 12A [Source:MGI Symbol;Acc:MGI:2385891]	2.11228	1.0788	1.29e-18	2.5e-16	yes	up	19.17	18.78	15.25	7.47	7.79	7.88	17.7333	7.71333
ENSMUSG00000044211	Gm7887	predicted gene 7887 [Source:MGI Symbol;Acc:MGI:3648251]	0.0472881	-4.40238	0.0492525	1	yes	down	0	0	0	0	2.61	0	0	0.87
ENSMUSG00000045502	Hcar2	hydroxycarboxylic acid receptor 2 [Source:MGI Symbol;Acc:MGI:1933383]	12.5905	3.65427	0.0294867	1	yes	up	0.07	0.23	0.24	0	0	0.04	0.18	0.0133333
ENSMUSG00000046157	Tmem229b	transmembrane protein 229B [Source:MGI Symbol;Acc:MGI:2444389]	2.05977	1.04248	0.0387915	1	yes	up	0.45	0.51	0.54	0.22	0.23	0.16	0.5	0.203333
ENSMUSG00000046223	Plaur	plasminogen activator, urokinase receptor [Source:MGI Symbol;Acc:MGI:97612]	3.01072	1.59011	5.67e-17	9.2e-15	yes	up	22.31	27.9	16.06	5.61	7.55	6.79	22.09	6.65
ENSMUSG00000047407	Tgif1	TGFB-induced factor homeobox 1 [Source:MGI Symbol;Acc:MGI:1194497]	2.22843	1.15603	3.7e-40	2.02e-37	yes	up	60.94	70.43	62.28	28.9	28.82	26.38	64.55	28.0333
ENSMUSG00000047446	Arl4a	ADP-ribosylation factor-like 4A [Source:MGI Symbol;Acc:MGI:99437]	2.10463	1.07357	2.46e-20	5.46e-18	yes	up	32.21	34.62	31.55	17.05	16.42	16.34	32.7933	16.6033
ENSMUSG00000047501	Cldn4	claudin 4 [Source:MGI Symbol;Acc:MGI:1313314]	3.73308	1.90037	6.09e-138	3.66e-134	yes	up	284.97	354.24	341.06	78.95	81.86	87.63	326.757	82.8133
ENSMUSG00000047641	Krt87	keratin 87 [Source:MGI Symbol;Acc:MGI:3665486]	0.346488	-1.52912	0.0171779	1	yes	down	0.21	0.16	0.19	0.6	0.33	0.61	0.186667	0.513333
ENSMUSG00000047793	Sned1	sushi, nidogen and EGF-like domains 1 [Source:MGI Symbol;Acc:MGI:3045960]	0.379102	-1.39934	0.00434318	1	yes	down	0.14	0.09	0.05	0.19	0.18	0.18	0.0933333	0.183333
ENSMUSG00000048106	4632415L05Rik	RIKEN cDNA 4632415L05 gene [Source:MGI Symbol;Acc:MGI:1918058]	18.2758	4.19186	0.0434733	1	yes	up	0	0.76	0.15	0.03	0	0	0.303333	0.01
ENSMUSG00000048834	Vstm2a	V-set and transmembrane domain containing 2A [Source:MGI Symbol;Acc:MGI:2384826]	0.063086	-3.98654	0.0478574	1	yes	down	0	0	0	0.05	0.05	0.08	0	0.06
ENSMUSG00000048905	Bnip5	BCL2 interacting protein 5 [Source:MGI Symbol;Acc:MGI:1925441]	2.07411	1.05249	8.33e-08	5.44e-06	yes	up	2.92	2.51	3.3	1.12	1.02	1.94	2.91	1.36
ENSMUSG00000049892	Rasd1	RAS, dexamethasone-induced 1 [Source:MGI Symbol;Acc:MGI:1270848]	3.75005	1.90691	1.12e-10	1.06e-08	yes	up	4.45	5.27	4.72	1.04	0.94	1.67	4.81333	1.21667
ENSMUSG00000050395	Tnfsf15	tumor necrosis factor (ligand) superfamily, member 15 [Source:MGI Symbol;Acc:MGI:2180140]	3.58057	1.84019	0.000260839	1	yes	up	0.3	0.51	0.37	0.12	0.1	0.08	0.393333	0.1
ENSMUSG00000051331	Cacna1c	calcium channel, voltage-dependent, L type, alpha 1C subunit [Source:MGI Symbol;Acc:MGI:103013]	2.60232	1.3798	0.0328089	1	yes	up	0.48	0.32	0.28	0.2	0.12	0.01	0.36	0.11
ENSMUSG00000051397	Tacstd2	tumor-associated calcium signal transducer 2 [Source:MGI Symbol;Acc:MGI:1861606]	0.350171	-1.51387	0.0120898	1	yes	down	0.41	0.34	0.23	0.74	0.53	1.4	0.326667	0.89
ENSMUSG00000052837	Junb	jun B proto-oncogene [Source:MGI Symbol;Acc:MGI:96647]	2.95164	1.56152	2.43e-56	2.92e-53	yes	up	148.99	132.32	132.59	40.66	42.79	49.85	137.967	44.4333
ENSMUSG00000053175	Bcl3	B cell leukemia/lymphoma 3 [Source:MGI Symbol;Acc:MGI:88140]	2.33267	1.22198	6.38e-16	9.35e-14	yes	up	16.76	18.64	17.81	5.76	5.88	5.97	17.7367	5.87
ENSMUSG00000056313	Tcim	transcriptional and immune response regulator [Source:MGI Symbol;Acc:MGI:1916318]	2.62975	1.39492	1.4e-62	2.1e-59	yes	up	118.19	140.45	116.95	43.16	44.41	47.64	125.197	45.07
ENSMUSG00000056749	Nfil3	nuclear factor, interleukin 3, regulated [Source:MGI Symbol;Acc:MGI:109495]	2.67862	1.42149	1.31e-30	4.48e-28	yes	up	18.36	20.65	20.6	7.32	6.58	7.2	19.87	7.03333
ENSMUSG00000056904	Gm5620	predicted gene 5620 [Source:MGI Symbol;Acc:MGI:3647798]	0.111306	-3.1674	0.00921715	1	yes	down	0.09	0.03	0.07	0.33	0.8	0.26	0.0633333	0.463333
ENSMUSG00000057132	Rpgrip1	retinitis pigmentosa GTPase regulator interacting protein 1 [Source:MGI Symbol;Acc:MGI:1932134]	0.468935	-1.09254	0.0162031	0.14925	yes	down	2.49	0.91	0.33	2.05	3.5	1.77	1.24333	2.44
ENSMUSG00000058070	Eml1	echinoderm microtubule associated protein like 1 [Source:MGI Symbol;Acc:MGI:1915769]	0.332345	-1.58925	0.0347763	1	yes	down	0.11	0.15	0.08	0.21	0.33	0.24	0.113333	0.26
ENSMUSG00000058427	Cxcl2	chemokine (C-X-C motif) ligand 2 [Source:MGI Symbol;Acc:MGI:1340094]	113.368	6.82488	2.1e-07	1	yes	up	1.2	2.26	1.15	0	0	0	1.53667	0
ENSMUSG00000059654	Reg1	regenerating islet-derived 1 [Source:MGI Symbol;Acc:MGI:97895]	0.460185	-1.11972	0.0197047	0.16896	yes	down	239.13	97.7	97.88	265.71	287.8	349.08	144.903	300.863
ENSMUSG00000059991	Nptx2	neuronal pentraxin 2 [Source:MGI Symbol;Acc:MGI:1858209]	2.3017	1.2027	0.0330898	1	yes	up	0.42	0.8	0.57	0.17	0.21	0.35	0.596667	0.243333
ENSMUSG00000066315	Gm12918	predicted gene 12918 [Source:MGI Symbol;Acc:MGI:3652005]	0.00043583	-11.1639	0.00427092	0.0610793	yes	down	0	0.01	0	123.84	75.61	0	0.00333333	66.4833
ENSMUSG00000067010	Vmn2r10	vomeronasal 2, receptor 10 [Source:MGI Symbol;Acc:MGI:1316730]	14.9012	3.89736	0.0497294	1	yes	up	0.02	0.04	0.02	0	0	0	0.0266667	0
ENSMUSG00000067203	H2-K2	histocompatibility 2, K region locus 2 [Source:MGI Symbol;Acc:MGI:95906]	3.42444	1.77587	0.00511732	1	yes	up	1.14	2.17	1.62	0.62	0.21	0.51	1.64333	0.446667
ENSMUSG00000067771	Pwwp4a	PWWP domain containing 4A [Source:MGI Symbol;Acc:MGI:3710618]	24.0657	4.5889	0.0156461	1	yes	up	0.18	0.14	0	0	0	0	0.106667	0
ENSMUSG00000069114	Zbtb10	zinc finger and BTB domain containing 10 [Source:MGI Symbol;Acc:MGI:2139883]	2.63404	1.39727	0.0101878	1	yes	up	0.14	0.27	0.21	0.08	0.08	0.06	0.206667	0.0733333
ENSMUSG00000069136	A130006I12Rik	RIKEN cDNA A130006I12 gene [Source:MGI Symbol;Acc:MGI:2441774]	16.82	4.07211	0.0336807	1	yes	up	1.98	2.14	0.86	0	0	0	1.66	0
ENSMUSG00000069170	Adgrv1	adhesion G protein-coupled receptor V1 [Source:MGI Symbol;Acc:MGI:1274784]	0.207707	-2.26738	0.0318741	1	yes	down	0.23	0.05	0.09	0.42	0.34	0.36	0.123333	0.373333
ENSMUSG00000070908	Gm13288	predicted gene 13288 [Source:MGI Symbol;Acc:MGI:3701985]	0.0658055	-3.92565	0.0178033	1	yes	down	0	0	0.03	0.06	0.11	0.2	0.01	0.123333
ENSMUSG00000071613	Gm10340	predicted gene 10340 [Source:MGI Symbol;Acc:MGI:3641969]	2.61868	1.38884	7.72e-05	0.00275409	yes	up	1.12	1.4	1.35	0.48	0.59	0.32	1.29	0.463333
ENSMUSG00000073538	E330020D12Rik	Riken cDNA E330020D12 gene [Source:MGI Symbol;Acc:MGI:3761270]	2.30491	1.20471	0.0275363	1	yes	up	0.53	1.49	1.02	0.55	0.5	0.18	1.01333	0.41
ENSMUSG00000073724	Pramel4	PRAME like 4 [Source:MGI Symbol;Acc:MGI:2156377]	0.473893	-1.07737	0.0346984	1	yes	down	0.68	0.22	0.31	0.65	0.8	1.08	0.403333	0.843333
ENSMUSG00000074580	4931440P22Rik	RIKEN cDNA 4931440P22 gene [Source:MGI Symbol;Acc:MGI:1918254]	2.06742	1.04783	0.0448847	1	yes	up	0.88	0.91	0.81	0.89	0.24	0.93	0.866667	0.686667
ENSMUSG00000074639	Rdh16f2	RDH16 family member 2 [Source:MGI Symbol;Acc:MGI:3583955]	0.374319	-1.41766	0.031236	1	yes	down	0.61	0.32	0.23	0.9	0.9	1.13	0.386667	0.976667
ENSMUSG00000074896	Ifit3	interferon-induced protein with tetratricopeptide repeats 3 [Source:MGI Symbol;Acc:MGI:1101055]	0.406377	-1.29911	0.0212006	1	yes	down	0.42	0.67	0.65	0.67	0.64	2.68	0.58	1.33
ENSMUSG00000075254	Heg1	heart development protein with EGF-like domains 1 [Source:MGI Symbol;Acc:MGI:1924696]	2.1191	1.08346	8.32e-08	5.44e-06	yes	up	1.7	3.66	3.12	1.66	0.87	2.12	2.82667	1.55
ENSMUSG00000076138	Gm26377	predicted gene, 26377 [Source:MGI Symbol;Acc:MGI:5456154]	0.363318	-1.46069	0.0306865	1	yes	down	0	0	0	0	0	0	0	0
ENSMUSG00000078901	Gm14440	predicted gene 14440 [Source:MGI Symbol;Acc:MGI:3702430]	0.395869	-1.3369	0.0228828	1	yes	down	0.08	10.74	0.2	0.6	0.97	0.27	3.67333	0.613333
ENSMUSG00000079018	Ly6c1	lymphocyte antigen 6 complex, locus C1 [Source:MGI Symbol;Acc:MGI:96882]	0.165138	-2.59826	0.00793575	1	yes	down	0.32	0.32	0.28	0.23	0.94	3.62	0.306667	1.59667
ENSMUSG00000079710	Dynlt2a2	dynein light chain Tctex-type 2A2 [Source:MGI Symbol;Acc:MGI:3809205]	2.34824	1.23158	0.00486648	1	yes	up	0.85	1.31	1.06	0.45	0.39	0.72	1.07333	0.52
ENSMUSG00000081343	Gm16071	predicted gene 16071 [Source:MGI Symbol;Acc:MGI:3801777]	2.66515	1.41422	0.0117084	1	yes	up	2.74	3	2.51	1.35	0.58	1.02	2.75	0.983333
ENSMUSG00000081344	Gm14303	predicted gene 14303 [Source:MGI Symbol;Acc:MGI:3651379]	0.449633	-1.15318	0.00210405	0.0374458	yes	down	1489.34	484	1263.83	1826.92	1661.28	1786.28	1079.06	1758.16
ENSMUSG00000084792	1700056N10Rik	RIKEN cDNA 1700056N10 gene [Source:MGI Symbol;Acc:MGI:1920642]	0.386109	-1.37292	0.0359491	1	yes	down	0.79	0.5	0.29	1.57	1.4	0.9	0.526667	1.29
ENSMUSG00000084917	Gm17477	predicted gene, 17477 [Source:MGI Symbol;Acc:MGI:4937111]	4.26779	2.09349	0.00496559	1	yes	up	0.62	0.32	0.48	0.08	0.03	0.21	0.473333	0.106667
ENSMUSG00000084960	B430010I23Rik	RIKEN cDNA B430010I23 gene [Source:MGI Symbol;Acc:MGI:1926099]	3.58866	1.84345	0.00537895	1	yes	up	0.83	0.91	0.96	0.27	0.19	0.19	0.9	0.216667
ENSMUSG00000085408	C530005A16Rik	RIKEN cDNA C530005A16 gene [Source:MGI Symbol;Acc:MGI:3612454]	2.07876	1.05573	0.040726	1	yes	up	0.55	0.86	0.69	0.26	0.46	0.22	0.7	0.313333
ENSMUSG00000085457	1110046J04Rik	RIKEN cDNA 1110046J04 gene [Source:MGI Symbol;Acc:MGI:1916058]	2.02979	1.02133	0.0334619	1	yes	up	1.13	1.51	1.48	0.82	0.77	0.97	1.37333	0.853333
ENSMUSG00000085887	Arhgap27os3	Rho GTPase activating protein 27, opposite strand 3 [Source:MGI Symbol;Acc:MGI:3650159]	3.86297	1.94971	0.00132257	1	yes	up	0.56	1.22	0.39	0.28	0.15	0.1	0.723333	0.176667
ENSMUSG00000085917	Gm15899	predicted gene 15899 [Source:MGI Symbol;Acc:MGI:3801945]	18.4705	4.20715	0.0126332	1	yes	up	48.56	62.19	1.06	0	0	5.44	37.27	1.81333
ENSMUSG00000086269	Tmcc3os	transmembrane and coiled coil domains 3, opposite strand [Source:MGI Symbol;Acc:MGI:3801736]	12.9495	3.69482	0.0256595	1	yes	up	0.14	0.14	0.06	0	0	0.02	0.113333	0.00666667
ENSMUSG00000086417	Gm12996	predicted gene 12996 [Source:MGI Symbol;Acc:MGI:3650481]	0.0828845	-3.59275	0.0391605	1	yes	down	0	0	0.16	0.35	1.16	0.54	0.0533333	0.683333
ENSMUSG00000086486	Ift88os	intraflagellar transport 88, opposite strand [Source:MGI Symbol;Acc:MGI:1919181]	6.29487	2.65418	0.0450441	1	yes	up	0.41	0.25	0.03	0.04	0.03	0.04	0.23	0.0366667
ENSMUSG00000086992	Gm15941	predicted gene 15941 [Source:MGI Symbol;Acc:MGI:3802081]	8.44511	3.07812	0.0354304	1	yes	up	0.91	0.42	0.45	0	0.16	0.24	0.593333	0.133333
ENSMUSG00000087458	Gm13999	predicted gene 13999 [Source:MGI Symbol;Acc:MGI:3651905]	0.0568446	-4.13683	0.049839	1	yes	down	0	0	0	0	0.39	0.36	0	0.25
ENSMUSG00000087502	Gm16091	predicted gene 16091 [Source:MGI Symbol;Acc:MGI:3802007]	2.56939	1.36143	1.6e-05	0.000693953	yes	up	5.93	8.36	5.96	2.4	2.08	2.93	6.75	2.47
ENSMUSG00000089748	Matr3-ps2	matrin 3, pseudogene 2 [Source:MGI Symbol;Acc:MGI:1298410]	3.49604	1.80572	0.026597	1	yes	up	0.52	0.4	0.39	0.18	0.14	0.04	0.436667	0.12
ENSMUSG00000090214	Gm15657	predicted gene 15657 [Source:MGI Symbol;Acc:MGI:3783100]	2.41304	1.27085	2.57e-07	1.54e-05	yes	up	15.49	18.41	10.96	5.53	6.36	5.59	14.9533	5.82667
ENSMUSG00000090622	A930033H14Rik	RIKEN cDNA A930033H14 gene [Source:MGI Symbol;Acc:MGI:2444562]	2.47655	1.30833	0.0383659	1	yes	up	0.35	0.72	0.25	0.21	0.18	0.11	0.44	0.166667
ENSMUSG00000091191	Gm17334	predicted gene, 17334 [Source:MGI Symbol;Acc:MGI:4936968]	3.13413	1.64807	1.38e-05	0.000605464	yes	up	1.39	1.43	0.97	0.35	0.52	0.27	1.26333	0.38
ENSMUSG00000093610	Cyp2c53-ps	cytochrome P450, family 2, subfamily c, polypeptide 53, pseudogene [Source:MGI Symbol;Acc:MGI:3646306]	98.1096	6.61632	5.66e-06	1	yes	up	0.15	0.5	2.55	0	0	0	1.06667	0
ENSMUSG00000094328	Tdpoz9	TD and POZ domain containing 9 [Source:MGI Symbol;Acc:MGI:3702970]	17.6186	4.13903	5.64e-07	1	yes	up	0.56	1.45	0.89	0.13	0	0.03	0.966667	0.0533333
ENSMUSG00000094622	Gm3055	predicted gene 3055 [Source:MGI Symbol;Acc:MGI:3809197]	2.21209	1.14541	0.000912154	0.0201059	yes	up	2.03	2.84	1.54	1.44	1.72	0.72	2.13667	1.29333
ENSMUSG00000095662	H2al1g	H2A histone family member L1G [Source:MGI Symbol;Acc:MGI:3710577]	17.9655	4.16716	0.029493	1	yes	up	0.3	1.46	1.17	0	0	0	0.976667	0
ENSMUSG00000095960	Gm13120	predicted gene 13120 [Source:MGI Symbol;Acc:MGI:3651691]	0.0890533	-3.48919	0.0468818	1	yes	down	0	0.05	0	0.22	0.1	0.26	0.0166667	0.193333
ENSMUSG00000096569	Amy2a2	amylase 2a2 [Source:MGI Symbol;Acc:MGI:3711220]	0.0610536	-4.03378	0.0287476	1	yes	down	0	0.01	0	0.02	0	0.27	0.00333333	0.0966667
ENSMUSG00000096751	Gm28373	predicted gene 28373 [Source:MGI Symbol;Acc:MGI:5579079]	3.36942	1.7525	9.94e-05	1	yes	up	1.41	1.12	0.75	0.39	0.22	0.33	1.09333	0.313333
ENSMUSG00000096770	Amy2a4	amylase 2a4 [Source:MGI Symbol;Acc:MGI:3711258]	0.0610536	-4.03378	0.0287476	1	yes	down	0	0.01	0	0.02	0	0.27	0.00333333	0.0966667
ENSMUSG00000096967	Gm26621	predicted gene, 26621 [Source:MGI Symbol;Acc:MGI:5477115]	2.6509	1.40648	4.54e-06	0.000227955	yes	up	2.47	2.5	2.2	1.38	1.13	1.49	2.39	1.33333
ENSMUSG00000097030	Gm26693	predicted gene, 26693 [Source:MGI Symbol;Acc:MGI:5477187]	0.0360427	-4.79415	0.00479812	1	yes	down	0	0	0	0.43	0.33	0.42	0	0.393333
ENSMUSG00000097069	Gm16998	predicted gene, 16998 [Source:MGI Symbol;Acc:MGI:4439922]	2.40813	1.26791	0.045663	1	yes	up	1.01	0.8	1.47	0.46	0.5	0.33	1.09333	0.43
ENSMUSG00000097472	Gm26586	predicted gene, 26586 [Source:MGI Symbol;Acc:MGI:5477080]	2.70683	1.4366	0.00111256	1	yes	up	2	1.92	1.1	0.69	0.53	0.55	1.67333	0.59
ENSMUSG00000097515	1700040D17Rik	RIKEN cDNA 1700040D17 gene [Source:MGI Symbol;Acc:MGI:1923852]	5.76619	2.52762	0.0218642	1	yes	up	0.84	0.62	0.62	0.09	0.17	0.09	0.693333	0.116667
ENSMUSG00000098678	Mroh6	maestro heat-like repeat family member 6 [Source:MGI Symbol;Acc:MGI:5011755]	0.464802	-1.10531	0.0267849	1	yes	down	0.37	0.35	0.4	0.75	0.98	0.57	0.373333	0.766667
ENSMUSG00000099609	Gm29008	predicted gene 29008 [Source:MGI Symbol;Acc:MGI:5579714]	2.6318	1.39605	0.0392785	1	yes	up	22.54	30.85	20.1	9.75	6.2	7.15	24.4967	7.7
ENSMUSG00000099746	Ppnr	per-pentamer repeat gene [Source:MGI Symbol;Acc:MGI:1349458]	0.273162	-1.87217	0.0358547	1	yes	down	0.05	0.06	0.05	0.19	0.07	0.3	0.0533333	0.186667
ENSMUSG00000100865	Gm9320	predicted gene 9320 [Source:MGI Symbol;Acc:MGI:3645000]	2.85556	1.51377	3.19e-06	0.000162354	yes	up	2.66	2.97	2.59	0.99	0.72	0.92	2.74	0.876667
ENSMUSG00000102143	Gm38057	predicted gene, 38057 [Source:MGI Symbol;Acc:MGI:5611285]	2.09753	1.06869	0.0244853	1	yes	up	0.41	0.79	0.67	0.3	0.33	0.21	0.623333	0.28
ENSMUSG00000102206	Pcdha11	protocadherin alpha 11 [Source:MGI Symbol;Acc:MGI:1298372]	0.133584	-2.90418	0.0353347	1	yes	down	0	0.04	0	0.02	0.15	0.09	0.0133333	0.0866667
ENSMUSG00000102496	Gm36989	predicted gene, 36989 [Source:MGI Symbol;Acc:MGI:5610217]	2.42757	1.27951	8.74e-05	0.00302434	yes	up	2.32	2.55	1.8	1.01	0.92	0.68	2.22333	0.87
ENSMUSG00000103046	Gm37309	predicted gene, 37309 [Source:MGI Symbol;Acc:MGI:5610537]	2.3684	1.24391	0.00226713	1	yes	up	1.98	2.44	1.47	0.88	0.57	0.91	1.96333	0.786667
ENSMUSG00000103145	Gm37744	predicted gene, 37744 [Source:MGI Symbol;Acc:MGI:5610972]	14.9581	3.90285	0.0481218	1	yes	up	0.14	0.14	0.13	0	0	0	0.136667	0
ENSMUSG00000103199	Gm37648	predicted gene, 37648 [Source:MGI Symbol;Acc:MGI:5610876]	5.08479	2.34619	0.029647	1	yes	up	0.42	0.22	0.07	0.03	0.05	0.05	0.236667	0.0433333
ENSMUSG00000103553	Gm38218	predicted gene, 38218 [Source:MGI Symbol;Acc:MGI:5611446]	0.239216	-2.06362	0.0400992	1	yes	down	0.03	0.03	0.03	0.13	0.12	0.07	0.03	0.106667
ENSMUSG00000103966	Gm37120	predicted gene, 37120 [Source:MGI Symbol;Acc:MGI:5610348]	0.403863	-1.30806	0.0252856	1	yes	down	0.17	0.11	0.03	0.26	0.23	0.24	0.103333	0.243333
ENSMUSG00000103983	Gm20045	predicted gene, 20045 [Source:MGI Symbol;Acc:MGI:5012230]	3.54097	1.82414	0.000278204	1	yes	up	0.68	0.49	0.23	0.12	0.16	0.1	0.466667	0.126667
ENSMUSG00000104280	Rps2-ps11	ribosomal protein S2, pseudogene 11 [Source:MGI Symbol;Acc:MGI:3648819]	12.0531	3.59133	0.03306	1	yes	up	0.73	0.33	0.39	0.11	0	0	0.483333	0.0366667
ENSMUSG00000104293	Gm38043	predicted gene, 38043 [Source:MGI Symbol;Acc:MGI:5611271]	0.449283	-1.1543	0.0422661	1	yes	down	0.07	0.18	0.13	0.17	0.25	0.38	0.126667	0.266667
ENSMUSG00000104347	Gm37689	predicted gene, 37689 [Source:MGI Symbol;Acc:MGI:5610917]	0.062988	-3.98878	0.0466109	1	yes	down	0	0	0	5.81	3.46	7.83	0	5.7
ENSMUSG00000104597	B230334C09Rik	RIKEN cDNA B230334C09 gene [Source:MGI Symbol;Acc:MGI:2442224]	0.0896641	-3.47933	0.0459203	1	yes	down	0.01	0	0	0.02	0.03	0.03	0.00333333	0.0266667
ENSMUSG00000104814	Gm42979	predicted gene 42979 [Source:MGI Symbol;Acc:MGI:5663116]	2.66443	1.41382	3.43e-05	0.00132341	yes	up	2.14	2.59	1.74	1.03	0.58	0.69	2.15667	0.766667
ENSMUSG00000104823	Gm43182	predicted gene 43182 [Source:MGI Symbol;Acc:MGI:5663319]	12.7989	3.67794	0.0254625	1	yes	up	0.13	0.14	0.12	0.03	0	0	0.13	0.01
ENSMUSG00000105071	Gm43336	predicted gene 43336 [Source:MGI Symbol;Acc:MGI:5663473]	0.329713	-1.60072	0.00968014	1	yes	down	0.15	0.1	0.05	0.18	0.31	0.4	0.1	0.296667
ENSMUSG00000105368	Gm43759	predicted gene 43759 [Source:MGI Symbol;Acc:MGI:5663896]	2.58297	1.36903	0.0104257	1	yes	up	1.59	1.6	1.25	0.51	0.55	0.57	1.48	0.543333
ENSMUSG00000105776	Gm43292	predicted gene 43292 [Source:MGI Symbol;Acc:MGI:5663429]	3.45644	1.78929	0.0109172	1	yes	up	0.36	0.57	0.41	0.09	0.14	0.14	0.446667	0.123333
ENSMUSG00000105929	Gm43693	predicted gene 43693 [Source:MGI Symbol;Acc:MGI:5663830]	18.1396	4.18107	0.0258388	1	yes	up	0.25	0.13	0.29	0	0	0	0.223333	0
ENSMUSG00000106087	Gm43609	predicted gene 43609 [Source:MGI Symbol;Acc:MGI:5663746]	3.15125	1.65592	8.68e-10	7.39e-08	yes	up	3.48	3.78	2.35	1.04	0.88	0.98	3.20333	0.966667
ENSMUSG00000106224	Gm43823	predicted gene 43823 [Source:MGI Symbol;Acc:MGI:5663960]	5.39238	2.43092	0.00333303	1	yes	up	0.31	1.04	0.67	0	0.19	0.16	0.673333	0.116667
ENSMUSG00000106665	Gm43389	predicted gene 43389 [Source:MGI Symbol;Acc:MGI:5663526]	3.06834	1.61746	0.0080286	1	yes	up	0.69	1.1	0.34	0.11	0.39	0.16	0.71	0.22
ENSMUSG00000106870	Gm43681	predicted gene 43681 [Source:MGI Symbol;Acc:MGI:5663818]	2.55276	1.35206	0.00186455	1	yes	up	1.62	1.77	1.1	0.54	0.4	0.72	1.49667	0.553333
ENSMUSG00000107171	Gm42572	predicted gene 42572 [Source:MGI Symbol;Acc:MGI:5662709]	4.14568	2.05161	0.0015692	1	yes	up	0.38	0.52	0.3	0.08	0.1	0.1	0.4	0.0933333
ENSMUSG00000107191	Gm43579	predicted gene 43579 [Source:MGI Symbol;Acc:MGI:5663716]	0.271045	-1.8834	0.0178223	1	yes	down	0.2	0.21	0.27	1.49	0.39	0.53	0.226667	0.803333
ENSMUSG00000107278	Gm42600	predicted gene 42600 [Source:MGI Symbol;Acc:MGI:5662737]	2.49915	1.32144	0.0408552	1	yes	up	0.32	0.3	0.25	0.13	0.09	0.11	0.29	0.11
ENSMUSG00000107374	Gm43172	predicted gene 43172 [Source:MGI Symbol;Acc:MGI:5663309]	6.48277	2.69661	0.0334254	1	yes	up	0.26	0.29	0.12	0.07	0.04	0	0.223333	0.0366667
ENSMUSG00000107379	Gm43126	predicted gene 43126 [Source:MGI Symbol;Acc:MGI:5663263]	0.180263	-2.47182	0.0126118	1	yes	down	0	3.21	0	4.23	5.73	4.83	1.07	4.93
ENSMUSG00000107699	Gm43970	predicted gene, 43970 [Source:MGI Symbol;Acc:MGI:5690362]	2.04799	1.03421	0.0394678	1	yes	up	0.29	0.56	0.79	0.17	0.27	0.31	0.546667	0.25
ENSMUSG00000107962	Gm43980	predicted gene, 43980 [Source:MGI Symbol;Acc:MGI:5690372]	2.05716	1.04065	3.95e-05	0.00150334	yes	up	5.02	5.98	4.57	2.5	1.83	2.84	5.19	2.39
ENSMUSG00000108024	Gm43912	predicted gene, 43912 [Source:MGI Symbol;Acc:MGI:5690304]	2.92925	1.55053	0.0197267	1	yes	up	3.39	6.43	3.27	0.73	1.81	1.54	4.36333	1.36
ENSMUSG00000108053	Gm43890	predicted gene, 43890 [Source:MGI Symbol;Acc:MGI:5690282]	4.55558	2.18764	2.65e-05	1	yes	up	0.85	0.84	0.88	0.3	0.09	0.15	0.856667	0.18
ENSMUSG00000108108	Gm44270	predicted gene, 44270 [Source:MGI Symbol;Acc:MGI:5690662]	2.7408	1.4546	0.0274818	1	yes	up	0.88	1.39	0.93	0.53	0.25	0.33	1.06667	0.37
ENSMUSG00000109052	Gm45012	predicted gene 45012 [Source:MGI Symbol;Acc:MGI:5753588]	3.08043	1.62313	0.0398944	1	yes	up	0.65	0.77	0.32	0.14	0.09	0.31	0.58	0.18
ENSMUSG00000109157	Gm44829	predicted gene 44829 [Source:MGI Symbol;Acc:MGI:5753405]	0.377515	-1.40539	0.00659391	1	yes	down	0.39	0.21	0.11	0.74	0.53	0.54	0.236667	0.603333
ENSMUSG00000109279	Gm45220	predicted gene 45220 [Source:MGI Symbol;Acc:MGI:5753796]	2.25612	1.17385	0.00596878	1	yes	up	1.07	1.09	0.9	0.34	0.59	0.36	1.02	0.43
ENSMUSG00000109617	Gm7669	predicted gene 7669 [Source:MGI Symbol;Acc:MGI:3648911]	11.785	3.55888	0.0351334	1	yes	up	0.18	0.14	0.29	0.05	0	0	0.203333	0.0166667
ENSMUSG00000109799	Gm45515	predicted gene 45515 [Source:MGI Symbol;Acc:MGI:5791351]	4.14747	2.05223	0.00141458	1	yes	up	0.64	1.38	0.45	0.1	0.26	0.2	0.823333	0.186667
ENSMUSG00000109807	Gm45244	predicted gene 45244 [Source:MGI Symbol;Acc:MGI:5791080]	0.445511	-1.16647	0.0207819	1	yes	down	0.29	0.52	0.32	0.95	0.8	0.62	0.376667	0.79
ENSMUSG00000110910	4921534A09Rik	RIKEN cDNA 4921534A09 gene [Source:MGI Symbol;Acc:MGI:2444504]	6.41974	2.68251	0.0335946	1	yes	up	0.19	0.14	0.22	0	0.05	0.03	0.183333	0.0266667
ENSMUSG00000111517	Or4a39	olfactory receptor family 4subfamily A member 39 [Source:MGI Symbol;Acc:MGI:3031072]	0.0513287	-4.28409	0.0278469	1	yes	down	0	0	0	0.01	0.08	0.03	0	0.04
ENSMUSG00000111539	Gm48372	predicted gene, 48372 [Source:MGI Symbol;Acc:MGI:6097846]	5.22001	2.38405	0.0342744	1	yes	up	0.17	0.2	0.26	0.03	0.03	0.06	0.21	0.04
ENSMUSG00000111551	Gm48128	predicted gene, 48128 [Source:MGI Symbol;Acc:MGI:6097487]	2.1031	1.07252	0.00370341	0.0560808	yes	up	1.05	1.21	0.69	0.29	0.57	0.48	0.983333	0.446667
ENSMUSG00000111729	Gm48038	predicted gene, 48038 [Source:MGI Symbol;Acc:MGI:6097354]	8.91891	3.15687	0.0303481	1	yes	up	0.36	1.52	3.02	0.12	0.5	0	1.63333	0.206667
ENSMUSG00000111936	Gm47540	predicted gene, 47540 [Source:MGI Symbol;Acc:MGI:6096548]	6.93386	2.79366	0.0119451	1	yes	up	0.18	0.38	0.13	0	0.02	0.07	0.23	0.03
ENSMUSG00000112545	1300014J16Rik	RIKEN cDNA 1300014J16 gene [Source:MGI Symbol;Acc:MGI:1921410]	2.02526	1.01811	0.00323956	0.0518892	yes	up	1.16	1.46	1.24	0.68	0.47	0.66	1.28667	0.603333
ENSMUSG00000112847	Gm47573	predicted gene, 47573 [Source:MGI Symbol;Acc:MGI:6096604]	2.45718	1.297	0.0487953	1	yes	up	0.4	0.58	0.3	0.17	0.16	0.16	0.426667	0.163333
ENSMUSG00000112925	Gm31763	predicted gene, 31763 [Source:MGI Symbol;Acc:MGI:5590922]	2.87116	1.52163	0.0407958	1	yes	up	0.6	1.58	0.35	0.61	0.27	0.07	0.843333	0.316667
ENSMUSG00000112963	Gm6093	predicted gene 6093 [Source:MGI Symbol;Acc:MGI:3648840]	0.0628891	-3.99105	0.0474266	1	yes	down	0	0	0	0.13	0.06	0.08	0	0.09
ENSMUSG00000113569	Gm48035	predicted gene, 48035 [Source:MGI Symbol;Acc:MGI:6097350]	2.74333	1.45593	0.00804019	1	yes	up	0.96	1.69	1.43	0.54	0.66	0.2	1.36	0.466667
ENSMUSG00000113918	Gm6566	predicted gene 6566 [Source:MGI Symbol;Acc:MGI:3647745]	2.10137	1.07133	0.0146609	1	yes	up	2.43	1.84	2.75	1.27	1.07	0.84	2.34	1.06
ENSMUSG00000114025	Gm49331	predicted gene, 49331 [Source:MGI Symbol;Acc:MGI:6121516]	2.02815	1.02016	0.00621784	0.0796449	yes	up	2.7	3.22	3	1.69	1.09	1.36	2.97333	1.38
ENSMUSG00000114133	Btf3l4b	basic transcription factor 3 like 4B [Source:MGI Symbol;Acc:MGI:5012260]	2.03229	1.02311	0.046649	1	yes	up	0.93	1.04	0.5	0.44	0.32	0.39	0.823333	0.383333
ENSMUSG00000114299	Gm47791	predicted gene, 47791 [Source:MGI Symbol;Acc:MGI:6096961]	3.00307	1.58644	4.34e-05	0.00164346	yes	up	20.42	25.91	23.82	5.72	5.62	10.27	23.3833	7.20333
ENSMUSG00000114369	Gm41077	predicted gene, 41077 [Source:MGI Symbol;Acc:MGI:5623962]	2.0739	1.05234	0.0150446	1	yes	up	1.87	2.06	1.41	1.01	0.75	0.68	1.78	0.813333
ENSMUSG00000116226	Gm49502	predicted gene, 49502 [Source:MGI Symbol;Acc:MGI:6155188]	2.25919	1.17581	0.010464	1	yes	up	1.08	1.29	0.82	0.34	0.49	0.5	1.06333	0.443333
ENSMUSG00000116305	Lncppara	long noncoding RNA near Ppara [Source:MGI Symbol;Acc:MGI:5568843]	0.38308	-1.38428	0.000803446	1	yes	down	1.72	0.86	1.04	2.77	3.56	2.73	1.20667	3.02
ENSMUSG00000117050	1700023B13Rik	RIKEN cDNA 1700023B13 gene [Source:MGI Symbol;Acc:MGI:1920529]	3.11606	1.63973	0.000437687	1	yes	up	2.72	3.64	2.4	0.74	0.7	1.22	2.92	0.886667
ENSMUSG00000117165	Gm49832	predicted gene, 49832 [Source:MGI Symbol;Acc:MGI:6270499]	0.135523	-2.88339	0.00657001	1	yes	down	0	137.95	0	251.07	171.34	168.1	45.9833	196.837
ENSMUSG00000117975	Itprip	inositol 1,4,5-triphosphate receptor interacting protein [Source:MGI Symbol;Acc:MGI:3042776]	3.0713	1.61885	5.62e-11	5.58e-09	yes	up	1.95	2.83	2.63	0.91	0.74	0.65	2.47	0.766667
ENSMUSG00000118000	4933403J19Rik	RIKEN cDNA 4933403J19 gene [Source:MGI Symbol;Acc:MGI:1918271]	7.70337	2.94549	0.0484272	1	yes	up	0.21	0.07	0.3	0.04	0.04	0	0.193333	0.0266667
ENSMUSG00000118038	Gm9895	predicted gene 9895 [Source:MGI Symbol;Acc:MGI:3642802]	2.98004	1.57533	8.68e-12	9.65e-10	yes	up	9.56	8.85	8.45	3.3	3.81	5.04	8.95333	4.05
ENSMUSG00000118064	Gm50210	predicted gene, 50210 [Source:MGI Symbol;Acc:MGI:6302997]	2.47312	1.30633	0.0250678	1	yes	up	0.29	0.75	0.82	0.38	0.16	0.15	0.62	0.23
ENSMUSG00000119979	-	novel transcript	2.40201	1.26424	0.0313766	1	yes	up	3.21	4.61	1.69	1.5	0.98	1.22	3.17	1.23333
ENSMUSG00000120025	-	novel transcript	2.03696	1.02642	0.0106308	1	yes	up	11.51	18.31	15.75	5.11	6.69	8.75	15.19	6.85
ENSMUSG00000120092	-	novel transcript	3.43978	1.78232	0.00130217	1	yes	up	1.99	3.04	2.42	1.04	0.53	0.47	2.48333	0.68
ENSMUSG00000120539	-	novel transcript	3.03733	1.6028	1.46e-08	1.1e-06	yes	up	2.15	3.2	1.82	0.79	0.82	0.62	2.39	0.743333
ENSMUSG00000120709	-	novel transcript	2.70118	1.43359	0.0390318	1	yes	up	0.52	0.88	0.48	0.13	0.2	0.33	0.626667	0.22
ENSMUSG00000120803	-	novel transcript, sense intronic to Larp4b	3.09661	1.63069	0.0483188	1	yes	up	0.29	0.22	0.37	0.11	0.11	0.05	0.293333	0.09
ENSMUSG00000120826	-	novel transcript, antisense to Hexim2	2.71886	1.443	0.00592013	1	yes	up	1.07	1.46	1.17	0.29	0.51	0.48	1.23333	0.426667
ENSMUSG00000121057	-	novel transcript, antisense to Foxk1	2.80625	1.48864	0.0151174	1	yes	up	0.75	1.63	1.62	0.59	0.49	0.26	1.33333	0.446667
ENSMUSG00002076896	Gm55431	predicted gene, 55431 [Source:MGI Symbol;Acc:MGI:6847332]	0.32437	-1.62429	0.0310631	1	yes	down	52.68	33.47	93.27	173.65	124.05	146.2	59.8067	147.967
