# Supplementary material for: Streptococcus salivarius subsp. thermophilus CCFM1312 enhanced mice resilience to activity-based anorexia
Source: Royal Society of Chemistry journal article supplement (doi:10.1039/d3fo04663j), 2024-01-01
Supplement: d3fo04663j2.pdf [file d3fo04663j2.pdf]

## Supplementary Materials

Table S1 Primers information

| Primer Name                     | Sequence (5'-3')                 |
|---------------------------------|----------------------------------|
| <i><math>\beta</math>-actin</i> | F-5'--CCTTCCAGCAGATGTGGATCA-3'   |
|                                 | R-5'--CTCAGTAACAGTCCGCCTAGAA-3'  |
| <i>Ghrl</i>                     | F-5'--GAAAGGAATCCAAGAAGCCACC-3'  |
|                                 | R-5'--GGAGCATTGAACCTGATTTCCA-3'  |
| <i>Pcskl</i>                    | F-5'--AGCTGGACCTTCATGTGATACC-3'  |
|                                 | R-5'--GCTAGCCTCTGGATCATAGTTGG-3' |
| <i>Goat</i>                     | F-5'--GTGCTGGTCTGTAATGGTGA-3'    |
|                                 | R-5'--GCAATGATGAGTTGGGTATG-3'    |
| <i>Agrp</i>                     | F-5'--CTTTGGCGGAGGTGCTAGAT-3'    |
|                                 | R-5'--TGCGACTACAGAGGTTTCGTG-3'   |
| <i>Npy</i>                      | F-5'--TAGGTAACAAGCGAATGGG-3'     |
|                                 | R-5'--GAGATAGAGCGAGGGTCAG-3'     |
| <i>Pomc</i>                     | F-5'--ACCTCACCACGGAAAGCAAC-3'    |
|                                 | R-5'--TCAGTCAAGGGCTGTTCATCTC-3'  |

Table S2 Differential metabolites between the ABA and FR group

| Name                              | P-values | VIP values  |
|-----------------------------------|----------|-------------|
| 2,4-di-tert-Butylphenol           | 0.00082  | 2.025914566 |
| 3-(4-Hydroxyphenyl)propionic acid | 1.10E-05 | 2.421638491 |
| 3-Hydroxybutyric acid             | 0.007081 | 1.786648881 |
| 3-Methylsalicylic acid            | 0.006801 | 1.777759996 |
| 3-Phenyllactic acid               | 0.04162  | 1.363420845 |
| 4-Chlorophenol                    | 0.018626 | 1.58541271  |
| 4-Ethylphenol                     | 0.000314 | 2.156005781 |
| 4-Hydroxybenzaldehyde             | 0.031694 | 1.421736909 |
| 4-Phenylbutyric acid              | 0.041417 | 1.379175701 |
| 5-Hydroxyindole-3-acetic acid     | 0.00341  | 1.888700121 |
| 5-Hydroxylysine                   | 0.027473 | 1.514478035 |
| 6-Gingerol                        | 0.036999 | 1.381499671 |
| 8Z,11Z,14Z-Eicosatrienoic acid    | 0.021618 | 1.564966198 |
| Acetylcholine                     | 0.018224 | 1.482932919 |
| Anandamide (AEA)                  | 0.00131  | 1.98777474  |
| Arachidonic acid                  | 0.0288   | 1.527726028 |
| Aspartylphenylalanine             | 0.026023 | 1.553896776 |
| Azelaic acid                      | 3.02E-06 | 2.483185446 |
| Bilirubin                         | 0.01034  | 1.687725373 |
| Caffeic acid                      | 0.014569 | 1.553846523 |
| Carvedilol                        | 0.010412 | 1.652928119 |
| Chlorogenic acid                  | 0.031019 | 1.487720269 |
| Cholic acid                       | 0.000455 | 2.084105753 |
| Choline                           | 0.000163 | 2.253260773 |
| cis,cis-Muconic acid              | 0.018079 | 1.565359294 |
| Creatine                          | 0.000326 | 2.126632824 |
| D-Carnitine                       | 2.06E-05 | 2.387324875 |
| Dodecanedioic acid                | 0.008352 | 1.669472796 |
| Gabapentin                        | 0.00123  | 1.989908178 |
| Guanidinosuccinic acid            | 0.028934 | 1.461618301 |
| Hexadecanamide                    | 0.009218 | 1.73751955  |
| Hexadecanedioic acid              | 0.018685 | 1.546448536 |
| Hexanoylcarnitine                 | 0.002826 | 1.81932675  |
| Hypoxanthine                      | 0.012633 | 1.611301722 |
| Isoleucine                        | 0.047159 | 1.388755156 |
| Linoleoyl ethanolamide            | 0.033299 | 1.445790709 |
| L-Saccharopine                    | 0.028907 | 1.422362598 |
| L-Threonine                       | 0.033817 | 1.44397619  |
| L-Tyrosine                        | 0.017027 | 1.609856766 |
| Myristic acid                     | 2.79E-05 | 2.354983988 |
| N-Acetylalanine                   | 0.000803 | 2.078879229 |

---

|                       |          |             |
|-----------------------|----------|-------------|
| N-Acetyl-L-methionine | 0.01352  | 1.632567965 |
| Palmitoylcarnitine    | 0.004094 | 1.84142905  |
| Penbutolol            | 0.000635 | 2.068159767 |
| Pentadecanoic acid    | 9.31E-05 | 2.257620068 |
| Perindopril           | 0.000615 | 2.117114699 |
| Phenylacetaldehyde    | 0.000746 | 2.065828624 |
| Pipecolic acid        | 0.039574 | 1.426534804 |
| Suberic acid          | 0.014412 | 1.606196815 |
| Tetradecanedioic acid | 0.001143 | 1.958864709 |
| Thiamine              | 0.038795 | 1.41924004  |
| Tridecylic acid       | 0.005539 | 1.732218932 |
| Tyrosol               | 4.10E-05 | 2.34312349  |
| Uracil                | 0.00372  | 1.838373878 |
| Uric acid             | 0.033374 | 1.409524046 |
| Vitamin E Acetate     | 0.032094 | 1.451070232 |
| Xanthine              | 0.016959 | 1.548638037 |

---

Table S3 Differential metabolites between the ABA and ABA+P group

| Name                           | P values | VIP values |
|--------------------------------|----------|------------|
| 3,5-Dihydroxybenzoic acid      | 0.007064 | 2.176553   |
| 3-tert-Butyladipic acid        | 0.041745 | 1.78273    |
| 4-Chlorophenol                 | 0.038747 | 1.758657   |
| 4-Ethylphenol                  | 0.041599 | 1.739441   |
| 5-Hydroxylysine                | 0.02463  | 1.819797   |
| 6-Gingerol                     | 0.019327 | 1.885859   |
| 8Z,11Z,14Z-Eicosatrienoic acid | 0.04984  | 1.689328   |
| Anandamide (AEA)               | 0.024609 | 1.905776   |
| Bilirubin                      | 0.036426 | 1.712416   |
| Cafestol                       | 0.045623 | 1.700934   |
| Chlorogenic acid               | 0.029052 | 1.888062   |
| Fluoxetine                     | 0.022101 | 1.924792   |
| Gabapentin                     | 0.000616 | 2.62333118 |
| Glycyl-L-leucine               | 0.020155 | 1.917377   |
| INH                            | 0.009143 | 2.13192256 |
| Leucylproline                  | 0.021622 | 1.962753   |
| Linoleic Acid                  | 0.041779 | 1.794814   |
| Linolenic Acid                 | 0.039819 | 1.806837   |
| L-Saccharopine                 | 0.041971 | 1.652961   |
| Methionine                     | 0.003603 | 2.30559178 |
| N6-Methyladenine               | 0.022864 | 1.870709   |
| Penbutolol                     | 0.0429   | 1.736262   |
| Phenylacetaldehyde             | 0.036367 | 1.82244    |
| Tyrosol                        | 0.00443  | 2.3677183  |
| Valylproline                   | 0.021764 | 1.916081   |

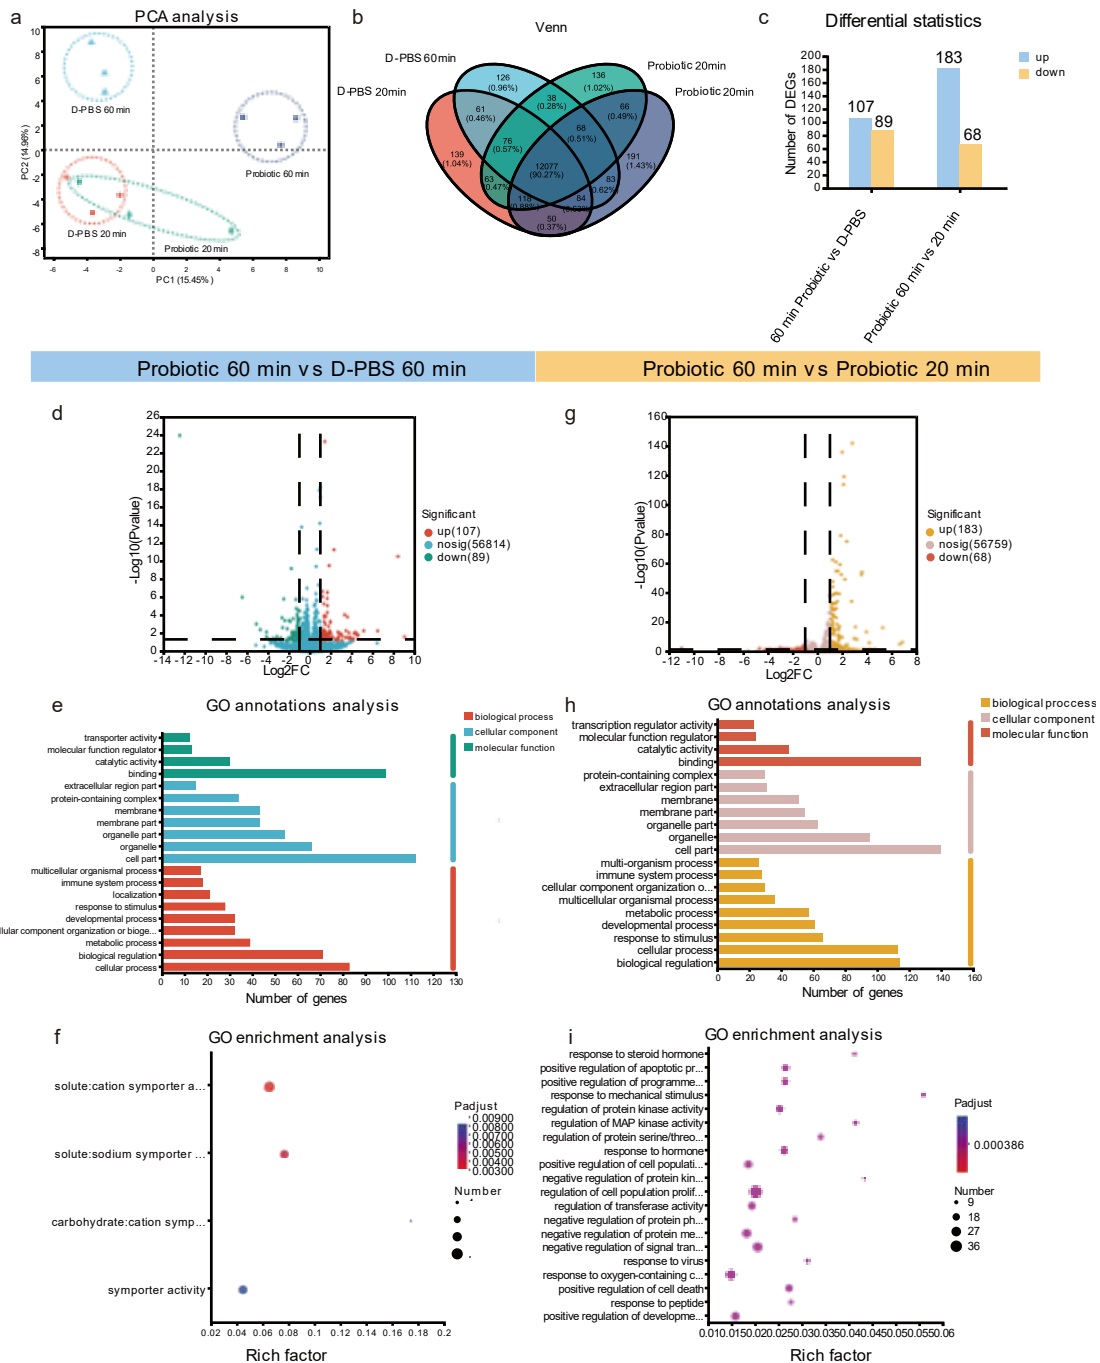

**Figure S1. RNA-Seq analysis of probiotic intervention in intestinal organoids.**

Intestinal organoids were subjected to a 20-minute and 60-minute exposure to both D-PBS and fermented supernatant, followed by collection for RNA sequencing. (a) PCA (Principal Component Analysis). (b) Venn analysis. (c) Differential expression statistics. (d) Volcano plot illustrating differential expression for the 60-minute probiotic and D-PBS intervention. (e) Gene Ontology (GO) annotations analysis for the 60-minute probiotic and D-PBS intervention. (f) GO enrichment analysis for the 60-minute probiotic and D-PBS intervention. (g) Volcano plot showing differential expression for the probiotic intervention at 60 minutes compared to 20 minutes. (h) GO annotations analysis for comparing 60-minute and 20-minute probiotic intervention. (i) GO enrichment analysis for comparing 60-minute and 20-minute probiotic intervention. Genes with  $p < 0.05$  and  $FC > 2$  are

identified as differentially expressed genes.

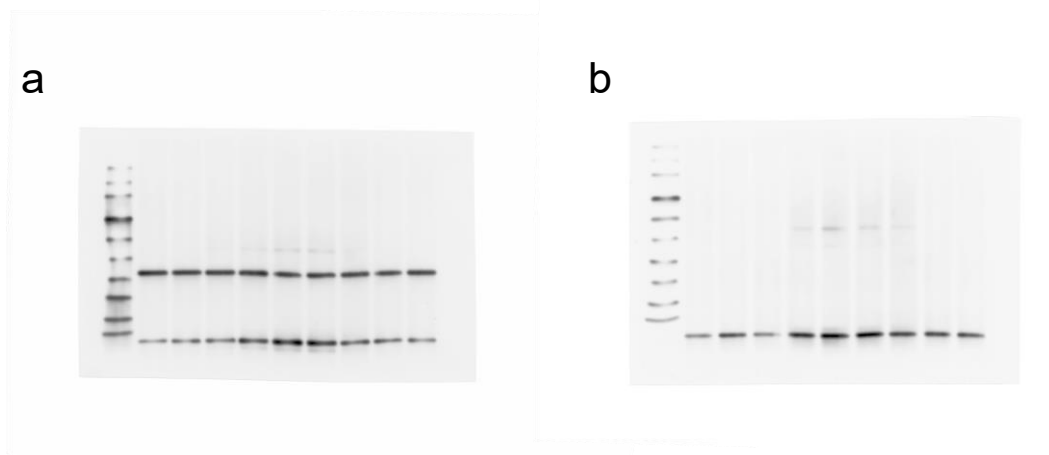

**Figure S2. Protein expression of AgRP and NPY.**
